# Supplementary material
Source: MDPI journal article supplement (https://www.mdpi.com/1424-2818/12/3/103)
Supplement: s1 [file s1]

## Sheet: Data
Table S1. SNP profiles of 66 non-vinifera rootstock accessions, genotyped at 18 K loci. Original dataset was filtered based on SNP call quality (p50GC < 0.54), GenTrain score (> 0.6) and monomorphic loci, resulting in 14,180 SNP loci. “A”: homozygous for dominant allele; “B”: heterozygous for recessive allele; “U”: missing data.
dbSNP_ID	Chromosome	Position	Strand	Allele	136	28	223	164	177	83	173	55	214	154	99	184	171	69	39	6	206	176	127	118	217	198	224	96	41	10	134	129	43	42	153	150	81	4	172	125	70	40	114	155	161	29	56	19	112
ae_A_C_chr1_11028575	1	11028575	-	T/G	A	A	A	A	A	A	A	A	A	A	A	A	A	A	A	A	A	A	A	A	A	A	A	A	A	A	A	A	A	A	A	A	A	A	A	A	A	A	H	A	A	A	A	A	A
ae_A_C_chr1_6610767	1	6610767	+	A/C	A	A	A	A	A	A	A	A	A	A	A	H	B	A	H	U	A	U	A	A	A	A	A	A	A	A	U	H	A	A	A	A	A	A	A	U	A	A	A	U	A	H	A	A	A
ae_A_C_chr10_random_180028	10	180028	-	T/G	H	A	A	A	A	A	A	A	A	A	A	A	A	A	A	A	A	A	A	A	A	A	A	A	A	A	A	A	H	A	A	H	A	A	A	A	H	A	H	A	A	A	A	H	A
ae_A_C_chr11_6021770	11	6021770	+	A/C	H	H	A	A	H	A	A	A	H	A	A	H	A	H	A	A	H	A	H	A	H	H	A	H	H	A	A	H	A	A	A	A	A	H	A	A	A	A	A	A	A	A	H	A	H
ae_A_C_chr12_21420343	12	21420343	-	T/G	A	H	H	A	H	A	A	A	A	A	A	H	A	A	A	A	H	H	H	H	H	A	A	H	H	H	H	H	A	A	A	A	A	H	A	H	A	A	A	H	H	A	A	A	H
ae_A_C_chr13_15308643	13	15308643	+	A/C	A	A	A	A	A	A	A	A	A	A	A	A	A	A	A	A	A	A	A	A	A	A	A	A	A	A	A	A	A	A	A	A	A	A	A	A	A	A	A	A	A	A	A	A	A
ae_A_C_chr13_15857974	13	15857974	+	A/C	A	A	A	A	H	A	A	H	B	A	A	H	A	B	A	B	B	H	B	H	B	H	A	U	B	A	A	A	A	H	A	A	A	B	A	A	A	H	H	A	A	B	A	A	A
ae_A_C_chr13_19656629	13	19656629	-	T/G	A	H	A	H	A	H	A	A	A	A	A	H	A	H	A	A	A	A	A	A	A	A	A	H	A	A	A	A	A	A	B	A	A	A	A	A	A	A	A	A	H	A	B	A	B
ae_A_C_chr16_6089065	16	6089065	+	A/C	A	H	H	H	A	H	H	H	A	A	H	A	H	H	A	H	A	H	H	A	A	A	A	H	H	H	A	H	H	H	A	A	H	A	A	A	A	A	H	A	H	A	A	H	H
ae_A_C_chr18_11509390	18	11509390	+	A/C	A	A	A	H	A	B	H	A	A	A	A	H	H	A	A	B	A	B	A	H	A	A	B	U	A	A	B	H	A	H	A	A	H	A	A	B	A	B	A	B	A	H	A	H	A
ae_A_C_chr19_12471978	19	12471978	-	T/G	A	H	H	H	H	H	H	H	H	H	H	H	H	H	A	H	H	H	H	H	H	H	H	H	H	H	H	H	H	H	H	A	H	H	H	H	H	A	H	H	H	H	H	H	H
ae_A_C_chr19_1247823	19	1247823	+	A/C	A	A	A	A	H	H	A	A	A	A	A	A	A	A	A	H	A	A	A	H	A	A	A	A	A	A	A	A	A	A	A	A	A	A	H	A	H	B	A	A	A	A	A	A	A
ae_A_C_chr19_6113897	19	6113897	-	T/G	A	A	A	A	A	U	A	A	A	A	A	A	A	A	A	A	A	A	A	U	A	A	A	A	A	A	A	A	A	A	A	A	A	A	A	A	A	A	A	A	A	H	A	A	A
ae_A_C_chr5_11986143	5	11986143	+	A/C	A	H	A	B	A	U	A	A	A	H	A	A	H	A	A	H	A	A	A	A	A	A	A	A	A	H	H	A	A	A	A	A	B	A	A	B	A	A	A	H	H	H	A	A	H
ae_A_C_chr5_19820004	5	19820004	+	A/C	A	A	A	A	A	A	A	A	A	A	A	A	A	A	A	A	A	A	A	A	A	A	A	A	A	A	A	A	A	A	A	A	A	A	A	A	A	A	A	A	A	A	A	A	A
ae_A_C_chr6_7411421	6	7411421	-	T/G	A	A	A	A	A	A	A	A	A	A	A	A	A	A	A	A	A	A	A	A	A	A	A	A	A	A	A	A	H	A	A	A	A	A	A	A	A	A	A	A	A	A	A	A	A
ae_A_C_chr7_10968312	7	10968312	-	T/G	B	B	A	B	A	U	A	H	A	B	H	A	H	H	A	B	B	B	H	H	A	B	H	B	B	H	B	H	A	H	H	A	B	B	B	B	H	H	A	B	B	H	H	H	H
ae_A_C_chr7_17769886	7	17769886	-	T/G	H	H	A	H	H	H	H	A	A	H	A	H	H	A	A	H	A	A	A	H	A	H	H	H	A	H	H	A	H	H	A	A	H	A	A	H	H	H	H	H	A	H	A	H	A
ae_A_C_chr8_10484101	8	10484101	-	T/G	A	A	A	A	H	H	B	A	A	A	A	A	H	A	A	A	A	A	A	A	A	A	A	A	A	A	A	A	B	A	A	H	A	A	A	A	B	A	A	A	A	H	A	A	A
ae_A_G_chr1_12009877	1	12009877	+	A/G	A	A	A	A	A	A	U	A	A	A	A	A	A	A	A	A	A	A	A	A	A	A	A	A	A	A	A	A	A	A	A	A	A	A	H	A	A	A	A	A	A	A	A	A	A
ae_A_G_chr1_15463774	1	15463774	-	T/C	A	A	A	A	A	A	A	A	A	A	A	A	A	A	A	A	A	A	A	A	A	A	A	A	A	A	A	A	A	A	A	A	A	A	A	A	A	A	A	A	A	A	A	A	A
ae_A_G_chr1_22233155	1	22233155	-	T/C	A	A	A	A	A	A	A	A	A	A	A	A	A	A	A	A	A	A	A	A	A	A	A	A	A	A	A	A	A	A	A	A	A	A	A	A	A	A	A	A	A	A	A	A	A
ae_A_G_chr1_3658518	1	3658518	+	A/G	H	B	A	H	H	H	H	A	A	A	A	H	H	H	A	H	H	B	H	H	H	A	A	A	B	H	A	H	A	B	A	A	H	H	H	H	A	A	H	H	H	H	B	A	B
ae_A_G_chr1_4654425	1	4654425	-	T/C	A	A	A	A	A	A	A	A	A	A	A	A	A	A	A	A	A	B	A	A	A	A	U	A	A	A	A	A	A	A	A	A	A	A	H	A	A	A	A	A	A	A	A	A	A
ae_A_G_chr1_5617181	1	5617181	+	A/G	B	B	B	B	B	B	H	B	B	B	B	H	H	B	A	B	B	H	B	B	B	H	B	H	B	B	B	B	A	B	B	A	B	B	H	B	B	B	H	B	B	B	B	H	B
ae_A_G_chr10_12978440	10	12978440	+	A/G	A	U	A	H	A	U	H	A	A	H	A	H	A	H	A	H	A	A	A	A	A	A	A	H	A	H	A	A	A	H	H	A	U	A	H	H	A	A	A	H	H	A	H	A	H
ae_A_G_chr10_16111486	10	16111486	-	T/C	A	A	A	A	A	H	A	A	A	A	A	A	A	A	A	A	A	A	A	A	A	A	H	A	A	A	A	A	A	A	A	A	A	A	A	A	A	A	A	A	A	A	A	A	A
ae_A_G_chr10_246947	10	246947	+	A/G	A	A	A	A	A	A	A	A	A	A	A	A	A	A	A	A	A	A	A	A	A	A	A	A	A	A	A	A	A	A	A	A	A	A	A	A	A	A	A	A	A	A	A	A	A
ae_A_G_chr10_3640271	10	3640271	+	A/G	H	B	H	H	B	H	A	H	B	B	B	B	A	B	A	A	B	B	B	A	B	B	H	B	B	B	H	B	A	B	B	A	H	B	B	H	A	B	H	H	B	B	B	H	B
ae_A_G_chr10_9530772	10	9530772	-	T/C	A	H	A	A	A	U	A	A	A	B	A	A	A	A	A	A	A	A	A	A	A	A	A	U	A	B	H	A	H	B	A	A	A	A	A	H	A	A	H	A	H	A	A	A	U
ae_A_G_chr11_15743909	11	15743909	+	A/G	B	H	H	B	B	B	H	B	B	B	B	U	B	B	B	H	B	H	B	B	B	B	B	H	B	B	H	B	H	B	B	B	B	H	H	H	B	U	B	B	H	H	B	B	B
ae_A_G_chr11_16645109	11	16645109	-	T/C	A	A	A	A	A	A	A	A	A	A	A	A	A	A	A	A	A	A	A	A	A	A	A	A	A	A	A	A	H	A	A	A	A	A	A	A	A	A	A	A	A	A	A	A	A
ae_A_G_chr11_19599651	11	19599651	+	A/G	A	A	A	A	A	A	H	A	A	A	A	A	A	A	A	A	A	A	A	A	A	A	A	A	A	A	H	A	A	A	A	A	A	A	A	A	A	A	A	H	A	A	A	A	A
ae_A_G_chr11_9896355	11	9896355	+	A/G	A	A	A	A	A	U	H	A	A	A	A	A	A	A	A	A	A	H	A	A	A	A	A	A	A	A	A	A	A	A	A	A	A	A	A	A	A	A	A	A	A	A	A	A	A
ae_A_G_chr12_14220095	12	14220095	-	T/C	A	A	A	H	H	A	H	B	A	A	A	A	B	A	H	A	A	A	A	U	A	A	B	H	A	A	H	A	B	A	H	B	H	U	A	H	A	A	A	A	A	U	A	H	A
ae_A_G_chr12_18531691	12	18531691	-	T/C	A	A	A	A	A	A	A	A	A	A	H	A	A	A	A	A	A	A	A	A	A	A	A	A	A	A	A	A	A	A	A	A	H	A	A	A	A	A	A	B	A	A	A	A	A
ae_A_G_chr12_19009966	12	19009966	-	T/C	H	B	B	A	B	A	H	B	H	H	B	H	H	B	B	A	H	H	H	H	B	H	B	B	H	B	A	H	H	H	B	H	A	B	H	A	B	B	A	H	H	H	H	A	B
ae_A_G_chr12_19507013	12	19507013	+	A/G	H	H	H	A	A	U	A	H	H	B	B	H	A	A	A	B	A	B	B	H	H	U	H	H	A	H	H	H	A	H	A	A	H	A	H	H	B	A	U	H	H	A	A	H	H
ae_A_G_chr12_2679578	12	2679578	-	T/C	A	A	A	H	A	H	A	A	A	H	A	H	A	A	A	H	A	A	A	A	A	A	A	A	A	A	H	A	A	H	A	A	H	A	A	B	A	A	H	B	A	U	A	A	A
ae_A_G_chr12_3134412	12	3134412	+	A/G	A	H	A	A	A	U	A	A	A	A	A	A	A	A	A	A	A	H	A	A	A	A	A	A	A	H	A	A	A	A	A	A	A	A	A	A	A	A	A	H	H	A	A	A	H
ae_A_G_chr12_4102780	12	4102780	+	A/G	A	A	A	A	A	A	A	A	A	A	A	A	A	A	A	A	A	A	A	A	A	A	A	A	A	A	A	A	A	A	A	A	A	A	A	A	A	A	A	A	A	A	A	A	A
ae_A_G_chr12_5525641	12	5525641	+	A/G	A	A	A	A	A	A	A	A	A	A	A	A	A	A	A	A	A	H	A	A	A	A	A	A	A	A	H	A	A	A	A	A	A	A	A	H	A	A	A	H	A	A	A	A	A
ae_A_G_chr13_14408449	13	14408449	+	A/G	H	A	H	B	H	U	H	A	B	B	A	A	H	H	A	H	H	H	A	H	A	A	H	H	H	H	B	H	A	H	H	A	B	H	A	B	A	H	H	B	H	H	A	A	A
ae_A_G_chr13_20648581	13	20648581	+	A/G	A	A	A	A	A	H	A	A	A	A	A	A	A	H	A	A	A	H	A	A	A	A	H	H	A	H	A	A	A	H	A	A	A	A	A	A	A	A	A	A	A	H	H	A	H
ae_A_G_chr13_21220933	13	21220933	+	A/G	A	H	A	A	A	H	A	A	A	H	H	H	A	H	A	A	A	A	A	A	A	A	A	A	A	A	A	A	A	A	A	A	A	A	H	A	A	H	A	A	A	A	A	A	A
ae_A_G_chr13_2195752	13	2195752	+	A/G	A	A	A	A	A	A	A	A	A	A	A	A	A	A	A	A	A	A	A	A	A	A	A	A	A	A	A	A	A	A	A	H	A	A	A	A	B	A	H	A	A	A	A	A	A
ae_A_G_chr13_23166542	13	23166542	+	A/G	A	A	A	A	A	A	A	A	A	A	A	A	A	A	A	A	A	A	A	A	A	A	A	A	A	A	A	A	A	A	A	A	A	A	H	A	A	A	A	A	A	A	A	A	A
ae_A_G_chr13_2724386	13	2724386	+	A/G	A	A	A	A	A	U	H	A	A	A	A	A	A	A	A	A	A	A	A	A	A	A	A	A	A	A	A	A	H	A	A	A	A	A	A	A	A	A	A	A	A	A	A	A	A
ae_A_G_chr13_random_2437813	13	2437813	+	A/G	H	H	A	A	A	H	H	A	A	A	A	A	A	A	H	H	H	A	A	A	H	H	A	A	A	H	H	B	H	H	A	A	A	A	A	H	A	H	A	A	H	A	B	H	B
ae_A_G_chr14_1705885	14	1705885	-	T/C	B	B	H	B	B	U	A	H	B	B	B	B	H	B	A	B	B	U	B	B	B	B	B	H	B	B	B	B	H	B	B	A	B	B	B	B	A	B	H	B	B	B	B	H	B
ae_A_G_chr14_19155190	14	19155190	-	T/C	A	A	A	A	A	A	H	A	A	A	A	A	A	A	A	A	A	H	A	A	A	A	A	A	A	A	A	A	A	A	A	A	A	A	A	A	A	A	A	A	A	A	A	A	A
ae_A_G_chr14_29523697	14	29523697	+	A/G	A	A	A	A	A	A	A	A	A	A	A	A	A	A	A	A	A	A	A	A	A	A	A	A	A	A	A	A	A	A	A	A	A	A	A	H	A	A	A	A	A	A	A	A	A
ae_A_G_chr14_7561321	14	7561321	-	T/C	A	A	A	A	A	A	A	A	A	A	A	A	A	A	A	A	A	A	A	A	A	A	A	A	A	A	A	A	A	A	A	A	A	A	A	A	A	A	A	A	A	A	A	A	A
ae_A_G_chr15_190284	15	190284	+	A/G	H	A	A	A	A	A	A	H	A	H	B	A	A	H	A	A	A	H	A	A	A	A	A	H	A	A	A	A	A	A	A	A	U	H	A	A	A	H	A	A	A	H	A	A	A
ae_A_G_chr15_6274632	15	6274632	+	A/G	H	B	A	B	H	U	A	A	H	B	H	A	A	H	A	U	H	A	H	A	H	A	A	B	H	B	U	B	H	B	A	A	U	A	H	U	H	H	A	U	B	A	B	A	B
ae_A_G_chr16_18304928	16	18304928	-	T/C	H	H	H	H	H	H	A	H	H	A	H	H	U	H	A	H	A	H	H	U	H	A	H	H	H	H	A	H	H	H	U	A	H	H	H	H	A	A	A	A	H	H	H	A	H
ae_A_G_chr16_19273650	16	19273650	+	A/G	A	A	H	H	A	A	H	A	A	H	A	A	A	A	A	U	A	A	A	A	A	A	H	A	A	H	H	H	H	A	A	A	H	H	A	H	A	A	A	H	H	U	A	A	A
ae_A_G_chr17_10010543	17	10010543	+	A/G	A	A	A	A	A	U	H	A	A	A	A	A	A	A	A	A	A	A	A	A	A	A	A	A	A	A	A	A	A	A	A	A	A	A	A	A	A	A	A	A	A	H	A	A	A
ae_A_G_chr17_11510574	17	11510574	+	A/G	A	A	A	A	A	A	A	A	A	A	A	A	A	A	A	A	A	A	A	A	A	A	A	A	A	A	A	A	A	A	A	A	A	A	A	A	A	A	A	A	A	H	A	A	A
ae_A_G_chr18_12994881	18	12994881	+	A/G	H	H	B	B	B	U	H	B	A	H	B	B	B	B	B	H	B	B	H	B	B	B	A	H	H	H	H	H	B	H	H	H	B	B	B	A	B	H	B	H	H	H	B	H	H
ae_A_G_chr18_26039726	18	26039726	-	T/C	A	A	A	A	A	A	A	A	A	A	A	A	A	A	A	A	A	A	H	A	H	A	A	H	H	A	A	A	A	A	A	A	A	H	H	A	A	A	B	A	A	H	A	A	A
ae_A_G_chr18_4127660	18	4127660	-	T/C	A	A	A	A	A	A	A	A	A	H	H	H	A	H	A	A	B	A	H	H	H	A	A	H	A	A	A	H	A	A	A	A	A	H	A	A	A	A	A	A	A	A	A	A	A
ae_A_G_chr18_6104262	18	6104262	-	T/C	H	H	A	H	H	U	H	A	A	H	A	A	H	A	A	B	A	H	A	A	H	H	A	H	A	H	H	H	H	H	H	A	H	A	H	H	A	A	H	B	H	H	A	H	H
ae_A_G_chr18_7570978	18	7570978	-	T/C	A	A	A	A	A	U	H	A	A	A	A	H	H	A	A	A	A	B	A	A	A	A	A	A	A	A	A	A	A	A	A	A	A	A	H	A	A	A	A	H	H	H	A	H	A
ae_A_G_chr18_9041880	18	9041880	+	A/G	A	A	A	A	H	A	H	A	A	A	A	A	A	U	A	A	A	A	A	A	A	A	A	A	A	A	A	A	A	A	A	A	A	A	A	A	H	A	A	A	A	A	A	A	A
ae_A_G_chr19_18821107	19	18821107	-	T/C	A	A	A	H	A	H	A	A	A	A	A	A	H	A	A	H	A	H	A	A	A	A	A	A	A	A	H	H	A	A	A	A	H	A	H	H	A	A	A	H	A	A	A	A	A
ae_A_G_chr19_22745026	19	22745026	-	T/C	A	A	A	A	H	H	H	A	A	H	A	A	H	A	A	A	A	A	A	A	A	H	A	A	H	A	A	A	H	A	A	A	B	A	A	A	A	A	A	H	H	A	A	A	A
ae_A_G_chr19_5644705	19	5644705	+	A/G	H	H	H	H	H	U	H	U	H	H	H	H	H	H	B	H	H	H	H	U	B	H	H	H	H	H	H	H	H	H	H	B	H	H	H	H	H	H	H	H	H	H	H	H	A
ae_A_G_chr19_7551981	19	7551981	+	A/G	A	A	A	A	A	A	A	A	A	A	A	A	A	H	A	A	A	B	H	A	A	H	A	A	A	A	B	A	H	H	H	A	A	A	H	B	A	A	H	B	A	A	A	H	A
ae_A_G_chr3_11779551	3	11779551	-	T/C	A	A	A	A	A	A	H	A	A	A	A	A	A	A	A	A	A	A	A	A	A	A	A	A	A	A	A	A	A	A	A	A	A	A	A	A	A	A	A	A	A	A	A	A	A
ae_A_G_chr3_2648300	3	2648300	+	A/G	A	A	A	A	A	A	A	A	A	A	A	A	A	A	A	A	A	H	A	A	A	A	A	A	A	A	A	A	A	A	A	A	A	A	H	A	A	A	A	A	A	A	A	A	A
ae_A_G_chr3_6502774	3	6502774	+	A/G	A	B	A	A	H	U	H	A	H	H	A	A	A	H	A	A	B	H	H	A	H	H	A	H	A	B	H	H	H	B	H	A	H	B	A	H	A	A	H	H	H	H	H	H	B
ae_A_G_chr3_9412258	3	9412258	-	T/C	A	A	A	A	A	H	H	A	A	A	A	A	A	A	A	A	A	A	A	A	A	A	A	A	A	A	A	A	H	A	A	A	A	A	A	A	A	A	A	A	A	A	A	A	A
ae_A_G_chr3_random_849292	3	849292	+	A/G	A	A	A	A	A	A	A	A	A	A	A	A	A	A	A	A	A	A	A	A	A	A	A	A	A	A	A	A	A	A	A	A	A	A	A	A	A	A	A	A	A	A	A	A	A
ae_A_G_chr4_11509339	4	11509339	-	T/C	H	H	H	H	A	H	A	A	A	A	A	A	H	A	A	B	A	A	A	A	A	A	A	A	A	H	B	H	A	A	A	A	H	H	A	H	A	A	A	B	H	A	A	A	B
ae_A_G_chr4_16781778	4	16781778	+	A/G	A	A	A	A	A	A	A	A	A	A	A	A	A	A	A	A	A	A	A	A	A	A	A	A	A	A	A	A	A	A	A	A	A	A	A	A	A	A	A	A	A	A	A	A	A
ae_A_G_chr4_18171703	4	18171703	+	A/G	A	A	A	A	A	A	A	A	A	A	A	A	A	A	A	A	A	A	A	A	A	A	A	A	A	A	A	A	A	A	A	A	A	A	A	A	A	A	A	A	A	A	A	A	A
ae_A_G_chr4_3637800	4	3637800	+	A/G	A	A	A	A	A	A	A	A	A	A	A	H	A	A	A	A	A	A	A	A	A	A	A	A	A	A	H	A	A	A	A	A	A	A	H	A	A	A	A	A	A	A	A	A	A
ae_A_G_chr4_9515269	4	9515269	-	T/C	A	A	A	A	A	A	A	A	A	A	A	A	A	A	A	A	A	A	A	A	A	A	A	A	A	A	A	A	H	A	A	A	A	A	A	A	A	A	A	A	A	A	A	A	A
ae_A_G_chr5_11016065	5	11016065	+	A/G	H	H	B	H	U	H	H	B	B	H	B	H	H	H	B	H	H	H	H	B	B	H	B	H	H	H	H	H	H	H	H	B	H	H	H	H	B	B	H	H	B	B	B	H	H
ae_A_G_chr5_14924800	5	14924800	+	A/G	A	A	A	H	H	A	H	A	A	A	B	U	H	B	A	H	U	B	U	A	B	A	U	H	A	A	H	B	H	B	U	A	H	U	B	H	H	U	A	H	H	B	A	H	A
ae_A_G_chr5_16400994	5	16400994	+	A/G	A	H	A	H	A	H	A	H	H	H	A	H	H	H	A	H	A	A	A	A	A	A	B	U	A	H	H	B	A	A	A	A	H	B	A	U	U	B	U	H	H	A	A	H	H
ae_A_G_chr5_2208442	5	2208442	+	A/G	A	H	H	H	A	H	H	A	A	A	A	A	A	A	A	H	A	A	A	A	A	A	A	A	A	H	H	A	H	A	A	A	H	A	A	A	H	A	H	H	H	H	A	A	H
ae_A_G_chr5_6616200	5	6616200	-	T/C	A	A	A	A	A	A	H	A	A	A	A	A	A	A	A	A	A	A	A	A	A	A	A	A	A	A	A	H	A	H	A	A	A	A	A	A	A	A	H	A	A	A	A	A	A
ae_A_G_chr6_13919398	6	13919398	+	A/G	B	B	H	H	H	U	A	H	B	B	B	B	H	B	A	B	B	B	B	A	B	B	A	H	B	B	H	B	H	B	B	A	H	B	B	H	A	A	A	H	B	H	B	H	B
ae_A_G_chr6_1703286	6	1703286	+	A/G	A	A	A	A	A	U	H	A	A	A	A	H	A	A	A	A	A	B	A	A	A	A	A	A	A	A	A	A	A	A	A	A	A	A	H	A	A	A	A	A	A	A	A	A	A
ae_A_G_chr7_13414136	7	13414136	-	T/C	A	A	A	A	A	B	A	A	A	A	A	A	H	A	A	A	A	A	A	A	A	A	A	A	A	A	A	A	A	A	A	A	A	A	A	A	A	A	A	A	A	A	A	A	A
ae_A_G_chr7_15812619	7	15812619	-	T/C	A	A	A	A	A	A	A	A	A	A	H	A	A	B	A	A	B	A	H	H	H	A	A	H	A	A	A	A	A	A	H	A	A	H	A	A	H	A	A	A	A	A	A	A	A
ae_A_G_chr7_16777504	7	16777504	-	T/C	A	A	A	A	A	A	A	A	A	A	A	A	A	A	A	A	A	A	A	A	A	A	A	A	A	A	A	A	A	A	A	A	A	A	A	A	A	A	A	A	A	A	A	A	A
ae_A_G_chr7_20676768	7	20676768	-	T/C	H	B	H	B	B	B	H	H	B	B	B	B	B	B	A	B	B	B	B	B	B	B	B	H	B	B	B	B	H	B	B	H	B	B	H	B	H	B	H	B	B	B	B	H	B
ae_A_G_chr7_2196512	7	2196512	+	A/G	B	H	B	H	B	A	A	A	H	B	B	B	A	B	H	A	H	H	H	H	B	H	H	H	B	H	H	B	H	B	H	B	A	H	H	H	A	A	H	H	H	H	H	B	H
ae_A_G_chr7_5592008	7	5592008	-	T/C	H	A	H	H	H	H	A	U	A	H	A	A	A	A	U	H	B	H	A	B	B	A	H	H	B	A	H	H	A	H	A	A	H	H	H	H	H	A	H	H	H	B	H	U	A
ae_A_G_chr7_785867	7	785867	+	A/G	H	H	A	H	H	H	H	A	H	H	H	A	H	H	A	H	H	H	H	H	H	H	H	H	H	H	H	H	H	H	H	H	H	H	H	H	H	H	H	H	H	U	H	H	H
ae_A_G_chr7_8994956	7	8994956	-	T/C	A	A	A	A	A	A	A	A	A	A	A	A	A	A	A	A	A	A	A	A	A	A	A	A	A	A	A	A	U	A	A	A	A	A	A	A	A	A	A	A	A	A	A	A	A
ae_A_G_chr8_11440804	8	11440804	+	A/G	B	B	H	B	H	B	H	B	B	B	B	B	H	B	A	B	B	H	B	B	B	B	B	B	B	B	B	B	A	B	B	A	B	B	H	B	H	B	B	B	B	B	B	H	B
ae_A_G_chr8_17271873	8	17271873	-	T/C	A	B	H	B	B	U	A	A	A	B	A	A	H	A	A	B	A	A	U	A	A	A	A	A	A	A	H	A	H	A	U	A	H	A	A	H	A	A	A	H	A	A	U	A	A
ae_A_G_chr8_22162388	8	22162388	+	A/G	A	H	A	A	A	A	H	A	A	A	A	A	A	H	A	A	A	A	A	A	A	H	A	U	A	H	A	A	A	A	B	A	A	A	A	A	A	A	A	A	H	A	A	A	B
ae_A_G_chr8_3638139	8	3638139	-	T/C	H	B	H	B	B	B	H	H	B	B	B	B	A	B	B	B	B	B	B	B	B	B	B	B	B	B	B	B	H	B	B	B	B	B	B	B	B	B	H	B	B	B	B	H	B
ae_A_G_chr8_4133769	8	4133769	-	T/C	A	A	A	A	A	A	A	A	A	A	A	A	A	A	A	U	A	U	A	A	A	A	A	A	A	A	U	A	H	A	A	A	A	A	A	U	A	A	A	U	A	A	A	A	A
ae_A_G_chr8_5620322	8	5620322	-	T/C	A	A	A	H	A	H	A	A	A	H	A	A	A	A	A	H	A	H	A	A	A	A	A	A	A	A	A	A	A	A	A	A	H	A	H	A	A	A	A	A	A	A	A	A	A
ae_A_G_chr9_16875880	9	16875880	-	T/C	H	A	A	A	U	A	A	H	A	A	A	U	A	A	A	A	A	A	A	A	A	A	U	A	A	A	H	A	A	A	U	A	A	A	A	U	A	A	A	A	A	A	A	H	A
ae_A_G_chr9_18849920	9	18849920	+	A/G	H	H	H	H	B	A	A	H	B	A	B	A	A	H	A	A	A	A	B	H	B	A	A	H	B	H	A	A	A	H	A	A	A	H	H	A	A	A	A	A	H	H	B	A	H
ae_A_G_chr9_222767	9	222767	+	A/G	H	H	A	H	B	U	A	H	B	H	B	B	A	B	A	B	B	H	B	B	B	H	B	U	B	H	H	B	H	H	B	A	B	B	H	H	A	B	A	H	H	B	B	A	H
ae_A_G_chr9_5101894	9	5101894	+	A/G	A	A	A	A	A	A	A	A	A	A	A	A	A	A	A	A	A	A	A	A	A	A	A	A	A	A	A	A	A	A	A	A	A	A	A	A	A	A	A	A	A	A	A	A	A
ae_A_G_chr9_5654412	9	5654412	-	T/C	B	A	A	A	H	A	A	A	U	A	A	H	B	H	A	U	A	A	A	A	A	H	A	A	U	A	A	A	A	A	A	A	A	A	H	A	U	A	A	A	A	B	U	U	A
ae_A_G_chr9_7069625	9	7069625	+	A/G	A	A	A	A	A	A	A	A	A	A	A	A	A	A	A	A	A	A	A	A	A	A	A	A	A	A	A	A	A	A	A	A	A	A	A	H	A	A	A	A	A	A	A	A	A
ae_A_G_chrUn_14770387	UN	14770387	+	A/G	A	A	A	A	H	A	A	A	A	A	A	A	A	A	A	A	A	A	A	A	A	A	A	A	A	A	A	A	A	A	A	A	A	A	A	A	A	A	A	A	A	A	A	A	A
ae_A_G_chrUn_17743455	UN	17743455	+	A/G	A	A	A	A	A	A	A	A	A	A	A	A	A	A	A	A	A	B	A	A	A	A	A	A	A	A	A	A	A	A	A	A	A	A	A	A	A	A	A	A	A	A	A	A	A
ae_A_G_chrUn_21404448	UN	21404448	-	T/C	B	B	H	B	B	B	H	B	B	H	B	B	B	B	B	B	B	B	B	B	B	B	B	H	B	H	B	B	B	B	B	H	B	B	B	B	B	B	B	H	H	B	B	H	B
ae_A_G_chrUn_28300065	UN	28300065	-	T/C	A	A	A	A	A	A	H	A	A	A	A	A	A	A	A	A	A	A	A	A	A	A	A	A	A	A	A	A	A	A	A	A	A	A	A	A	A	A	A	A	A	A	A	A	A
ae_A_G_chrUn_33400570	UN	33400570	+	A/G	A	A	A	H	A	A	H	A	A	A	A	A	A	A	A	A	A	A	A	A	A	A	A	A	A	A	H	A	A	A	A	A	A	A	A	H	A	A	A	H	A	A	A	H	A
ae_A_G_chrUn_36749389	UN	36749389	-	T/C	A	A	A	A	H	A	A	A	A	A	A	A	A	A	A	A	A	A	A	A	A	A	A	A	A	A	A	A	A	A	A	A	A	A	A	A	A	A	A	A	A	A	A	A	A
ae_A_G_chrUn_7295086	UN	7295086	+	A/G	H	A	H	H	H	H	A	H	H	H	H	H	H	H	A	U	H	H	H	H	H	H	H	H	U	H	H	H	H	H	H	A	H	H	H	U	H	H	A	U	H	H	H	A	H
ae_C_A_chr1_16512242	1	16512242	-	T/G	B	B	B	B	B	B	B	B	B	B	B	B	B	B	B	B	B	B	B	B	B	B	B	B	B	B	H	B	H	B	B	B	B	B	B	H	B	B	B	H	B	B	B	B	B
ae_C_A_chr1_19396648	1	19396648	+	A/C	B	B	B	B	B	B	H	B	B	B	B	B	B	B	B	B	B	B	B	B	B	B	B	B	B	B	B	B	H	B	B	B	B	B	B	B	B	B	B	B	B	B	B	B	B
ae_C_A_chr10_8510629	10	8510629	-	T/G	B	B	H	B	B	U	H	H	B	B	H	B	B	H	B	B	B	B	B	B	B	H	H	U	H	H	H	B	B	H	B	B	B	B	H	H	H	B	B	H	B	H	H	H	H
ae_C_A_chr12_1704447	12	1704447	-	T/G	B	B	B	B	B	B	B	B	B	B	B	B	B	B	B	B	B	B	B	B	B	B	B	B	B	B	B	B	B	B	B	B	B	B	B	B	B	B	B	B	B	B	B	B	B
ae_C_A_chr12_6484660	12	6484660	+	A/C	B	B	B	B	B	B	H	B	B	B	B	B	B	B	B	B	B	B	B	B	B	B	B	B	B	B	B	B	B	B	B	B	B	B	B	B	B	B	B	B	B	H	B	B	B
ae_C_A_chr12_random_222840	12	222840	-	T/G	H	B	B	H	H	H	H	H	B	B	H	H	H	B	H	H	H	H	B	H	H	H	H	H	H	B	H	H	H	H	H	H	B	H	H	U	H	H	H	H	B	H	B	H	B
ae_C_A_chr14_19789067	14	19789067	+	A/C	B	B	B	B	H	B	B	B	H	B	B	H	B	B	B	B	B	B	B	H	B	B	U	B	B	H	B	B	B	B	B	B	B	B	B	B	B	H	B	B	B	B	H	B	H
ae_C_A_chr14_20097630	14	20097630	+	A/C	A	H	B	H	H	U	H	B	A	A	B	B	H	A	A	A	A	A	A	B	A	A	A	H	U	A	A	A	B	H	B	H	H	U	A	A	B	H	H	A	H	H	B	H	B
ae_C_A_chr14_3175972	14	3175972	+	A/C	B	B	B	B	B	B	H	B	B	B	B	B	B	B	B	B	B	B	B	B	B	B	B	B	B	B	B	B	H	B	B	H	H	B	B	H	H	B	B	H	B	B	B	B	B
ae_C_A_chr16_10974718	16	10974718	-	T/G	B	B	B	H	U	B	B	B	B	B	B	B	B	H	B	U	B	H	U	B	H	H	B	B	B	H	B	B	B	H	B	B	B	H	B	B	B	H	B	B	B	B	H	B	B
ae_C_A_chr16_239149	16	239149	+	A/C	B	B	B	B	B	H	H	B	B	B	B	B	B	B	B	B	B	B	B	B	B	B	B	B	B	B	B	B	B	B	B	B	B	B	B	B	B	B	B	B	B	B	B	B	B
ae_C_A_chr18_15870025	18	15870025	-	T/G	B	B	B	B	H	B	U	B	B	B	B	B	B	B	B	B	B	B	B	B	B	B	B	B	B	B	B	H	H	B	B	B	B	B	B	B	H	B	B	B	B	B	B	B	B
ae_C_A_chr18_random_2310881	18	2310881	-	T/G	B	H	B	B	B	A	H	B	B	H	B	B	B	B	B	A	B	B	B	B	B	H	B	U	B	H	H	B	B	B	B	B	B	B	B	B	B	B	B	H	B	B	B	B	H
ae_C_A_chr19_11000781	19	11000781	+	A/C	B	B	B	B	B	B	B	B	B	B	B	B	B	B	B	B	B	B	B	B	B	B	B	B	B	B	B	B	B	B	B	B	B	B	B	B	B	B	B	B	B	B	B	B	B
ae_C_A_chr2_16528761	2	16528761	-	T/G	A	H	B	H	A	U	H	H	B	A	B	B	H	B	H	A	H	A	B	H	H	H	A	H	H	H	A	H	H	H	H	B	B	B	H	A	H	A	H	A	H	A	B	U	A
ae_C_A_chr2_9146205	2	9146205	+	A/C	H	A	B	A	B	A	B	U	B	A	B	H	H	B	B	A	B	A	B	B	B	H	B	H	B	A	A	H	B	H	B	B	A	B	H	A	B	B	H	A	A	U	B	H	A
ae_C_A_chr3_12292441	3	12292441	-	T/G	H	H	H	H	H	B	H	H	H	H	H	H	B	B	B	B	H	B	H	H	H	H	H	H	H	H	B	H	B	H	H	B	B	H	H	B	H	H	B	B	H	H	H	H	B
ae_C_A_chr3_8915616	3	8915616	-	T/G	H	H	H	B	H	H	B	B	B	H	B	H	H	B	H	H	B	U	B	B	B	B	H	B	H	H	H	H	H	H	H	B	H	H	U	H	B	H	H	H	H	B	H	H	H
ae_C_A_chr4_11000446	4	11000446	+	A/C	H	B	B	B	H	B	H	H	A	B	H	B	B	B	B	B	B	B	B	B	H	B	H	B	A	B	B	B	B	B	B	B	B	H	B	B	H	H	B	B	B	H	B	B	B
ae_C_A_chr4_21182561	4	21182561	+	A/C	H	B	B	H	B	U	B	B	B	H	B	B	B	B	B	H	B	B	B	B	B	H	B	B	B	B	H	H	B	H	B	B	U	B	B	H	B	B	H	H	H	B	B	H	B
ae_C_A_chr4_22630893	4	22630893	-	T/G	H	H	H	H	H	B	B	H	A	H	H	A	H	A	B	B	A	B	A	B	H	A	H	H	H	H	B	H	B	A	A	B	A	H	B	B	B	H	H	B	A	B	A	H	B
ae_C_A_chr6_11015022	6	11015022	+	A/C	B	B	B	B	B	B	H	B	B	B	B	B	B	B	B	H	B	B	B	B	B	B	B	B	B	B	B	B	B	B	B	B	B	B	B	H	B	B	B	B	B	B	B	B	B
ae_C_A_chr6_21253947	6	21253947	+	A/C	B	B	B	B	B	B	H	B	B	B	B	B	B	B	B	B	B	B	B	B	B	B	B	B	B	B	B	B	B	B	B	B	B	B	B	B	B	B	B	B	B	B	B	B	B
ae_C_A_chr7_14047666	7	14047666	-	T/G	A	H	H	U	A	B	H	U	A	H	A	H	H	A	B	H	A	H	H	B	H	H	H	A	A	H	B	A	B	A	A	B	H	A	H	H	H	U	B	H	H	A	A	U	H
ae_C_A_chr7_14403858	7	14403858	+	A/C	B	H	B	B	B	H	B	B	B	H	B	B	B	B	B	A	B	H	B	B	B	B	B	H	B	H	H	B	B	B	B	B	B	B	B	H	B	B	H	H	B	B	B	B	B
ae_C_A_chr8_15801620	8	15801620	-	T/G	B	B	B	B	H	B	H	B	B	B	B	B	B	B	B	B	B	B	B	H	B	B	H	B	B	B	A	B	H	B	B	B	B	B	B	A	B	H	B	A	B	H	B	B	B
ae_C_A_chr9_22265234	9	22265234	+	A/C	B	H	H	H	U	H	H	B	H	H	H	B	B	B	B	B	B	B	B	U	B	B	H	B	H	B	B	H	H	H	H	B	B	H	H	B	H	U	B	H	H	B	H	H	H
ae_C_A_chrUn_2188445	UN	2188445	-	T/G	H	H	H	H	H	U	H	U	U	H	H	H	B	H	B	U	B	H	H	H	H	U	H	B	H	H	B	B	H	H	H	B	H	H	H	B	B	H	H	B	H	H	H	H	H
ae_C_A_chrUn_40970057	UN	40970057	-	T/G	H	H	H	H	H	H	H	H	B	B	H	H	H	H	H	H	H	B	H	H	H	H	H	H	H	H	H	H	H	H	H	H	H	H	B	H	H	B	H	H	H	H	H	U	H
ae_C_T_chr1_250099	1	250099	-	T/C	B	B	B	B	B	B	B	B	B	B	B	B	B	B	B	B	B	H	B	B	B	B	B	B	B	B	B	B	H	B	B	B	B	H	B	B	B	B	B	B	B	H	B	B	B
ae_C_T_chr1_7112638	1	7112638	-	T/C	B	B	B	B	B	B	B	B	B	B	B	B	B	B	B	B	B	B	B	B	B	B	B	B	B	B	B	B	B	B	B	B	B	B	B	B	B	B	B	B	B	B	B	B	B
ae_C_T_chr10_10531662	10	10531662	-	T/C	B	B	B	B	B	B	B	B	U	B	B	B	B	B	B	B	B	B	B	A	B	B	H	B	B	B	B	B	B	B	B	B	B	B	B	B	B	H	B	B	B	H	B	B	B
ae_C_T_chr10_12028126	10	12028126	+	A/G	H	A	H	A	A	U	B	H	A	A	A	H	B	A	H	U	A	A	A	A	A	A	A	A	A	A	A	A	B	A	A	B	A	A	A	A	H	B	H	A	A	A	A	H	A
ae_C_T_chr10_13908940	10	13908940	+	A/G	B	H	B	H	H	B	B	H	H	H	A	H	B	B	B	A	H	A	H	B	H	H	H	H	B	B	H	H	H	H	H	B	H	H	H	A	B	U	H	A	H	H	H	H	B
ae_C_T_chr10_3226429	10	3226429	-	T/C	H	B	B	B	H	B	B	H	H	B	H	A	B	H	B	B	B	B	B	B	A	H	H	B	H	B	B	B	H	B	H	B	B	B	B	B	H	H	B	B	B	B	B	B	B
ae_C_T_chr10_5623054	10	5623054	+	A/G	B	B	B	B	B	B	B	B	B	B	B	B	B	B	B	B	B	B	B	B	H	B	B	B	B	B	B	B	B	B	B	B	B	B	B	B	B	B	B	B	B	B	B	B	B
ae_C_T_chr11_10862321	11	10862321	+	A/G	B	H	B	B	B	B	B	B	H	B	B	H	B	H	B	B	B	B	H	B	H	B	H	H	B	H	B	B	B	B	H	B	B	H	B	B	B	H	B	B	B	B	H	B	H
ae_C_T_chr11_11335247	11	11335247	+	A/G	U	B	B	B	B	H	H	B	B	B	B	B	H	B	B	B	B	B	B	H	B	H	H	B	B	B	H	H	B	H	B	B	B	B	B	H	H	H	U	H	H	B	B	H	B
ae_C_T_chr11_14246811	11	14246811	-	T/C	B	B	B	U	B	H	B	B	B	B	B	B	B	B	B	B	B	B	B	B	H	B	B	H	B	B	B	B	H	B	B	B	U	B	B	B	B	U	B	B	B	B	B	B	B
ae_C_T_chr11_18582591	11	18582591	-	T/C	B	H	B	A	B	U	H	B	B	A	B	B	H	B	B	A	B	B	B	B	B	H	B	H	B	H	A	H	H	H	B	B	A	B	B	A	B	B	H	A	H	B	B	H	B
ae_C_T_chr11_2170849	11	2170849	-	T/C	B	B	B	B	B	B	B	B	B	B	B	B	B	B	B	B	B	B	B	B	B	B	B	B	B	B	B	H	B	B	B	B	B	B	B	B	B	B	B	B	B	B	B	B	B
ae_C_T_chr12_10296309	12	10296309	+	A/G	B	H	B	A	H	H	H	H	A	A	A	A	H	H	B	A	A	H	A	H	A	A	H	H	A	H	A	A	H	A	A	B	A	A	A	A	H	H	H	H	H	A	A	B	H
ae_C_T_chr12_13220353	12	13220353	+	A/G	B	B	B	B	B	B	B	B	B	B	B	U	B	B	B	B	B	B	B	B	B	B	B	B	B	B	B	B	B	B	B	B	B	B	B	B	B	B	B	B	B	B	B	B	B
ae_C_T_chr12_15177907	12	15177907	-	T/C	H	H	H	H	H	H	H	H	H	H	H	H	B	H	B	H	H	H	H	H	H	U	H	H	H	H	H	H	H	H	H	B	H	H	H	H	H	U	H	U	H	H	H	H	H
ae_C_T_chr12_15662583	12	15662583	-	T/C	H	H	U	H	H	H	H	H	H	H	H	H	H	H	B	U	H	H	H	H	U	H	H	H	H	H	H	H	U	H	H	U	H	H	H	H	H	H	H	H	H	B	H	H	H
ae_C_T_chr12_19940392	12	19940392	+	A/G	B	B	B	B	B	B	B	B	B	B	B	B	B	A	B	U	B	B	B	B	A	B	B	B	B	B	B	B	B	B	B	B	B	B	B	B	B	B	B	B	B	B	B	B	B
ae_C_T_chr12_20970253	12	20970253	+	A/G	B	B	B	B	B	B	B	B	B	B	B	B	B	B	B	B	B	H	H	B	B	B	B	B	B	B	B	B	B	B	B	B	B	B	B	B	B	B	B	B	B	B	B	B	B
ae_C_T_chr12_21942395	12	21942395	-	T/C	B	B	B	B	B	B	B	B	B	B	B	H	B	B	B	B	B	H	B	B	B	B	B	B	B	B	B	H	B	B	B	B	B	B	H	B	B	B	B	H	B	B	B	B	B
ae_C_T_chr12_22406150	12	22406150	+	A/G	B	B	B	B	B	B	H	B	B	B	B	B	H	B	B	B	B	B	B	B	B	B	B	B	B	B	H	B	B	B	B	B	B	B	B	H	B	B	B	B	B	B	B	B	B
ae_C_T_chr13_10002445	13	10002445	-	T/C	H	H	H	H	H	H	H	B	H	U	H	H	H	A	B	H	H	H	H	H	A	H	H	H	H	H	H	A	H	H	H	B	H	H	A	U	U	H	H	H	H	B	A	H	U
ae_C_T_chr13_24144231	13	24144231	+	A/G	H	H	B	H	H	H	H	H	H	H	H	H	H	H	B	H	H	H	H	H	H	H	B	H	H	H	H	H	B	H	H	B	H	H	H	H	B	H	B	H	H	H	U	H	U
ae_C_T_chr13_4632083	13	4632083	-	T/C	A	A	H	A	H	H	H	U	H	A	H	H	H	H	B	H	H	U	H	A	A	H	H	H	H	A	H	H	B	H	A	B	A	A	H	H	B	A	H	H	H	H	H	H	H
ae_C_T_chr13_6120199	13	6120199	+	A/G	B	B	B	B	B	B	B	B	B	B	B	B	B	B	B	B	B	B	B	B	B	B	H	H	B	B	B	B	B	B	B	B	B	B	B	B	H	H	B	B	B	B	B	B	B
ae_C_T_chr13_7084481	13	7084481	+	A/G	B	B	H	U	B	B	B	B	B	H	B	B	B	B	B	H	B	B	B	B	B	H	B	B	B	H	H	B	B	H	B	B	H	B	B	H	B	B	H	H	H	B	B	B	B
ae_C_T_chr14_11447291	14	11447291	-	T/C	A	B	B	H	B	B	B	B	H	B	B	B	H	B	B	H	B	H	H	B	H	B	B	B	H	B	H	H	B	B	H	B	B	H	B	B	B	H	B	B	B	H	B	H	B
ae_C_T_chr14_16833185	14	16833185	+	A/G	B	B	B	B	B	B	H	B	B	B	B	B	B	B	B	H	B	B	B	H	B	B	B	B	B	B	B	B	B	B	B	B	B	B	B	B	B	B	B	B	B	H	B	B	B
ae_C_T_chr14_21693204	14	21693204	-	T/C	B	B	B	B	B	B	H	B	B	B	B	B	B	B	B	B	B	B	B	B	B	B	B	B	B	B	B	B	B	B	B	B	B	B	B	B	B	B	B	B	B	B	B	B	B
ae_C_T_chr14_23180125	14	23180125	+	A/G	B	B	B	B	B	B	H	B	B	B	B	B	B	B	B	B	B	B	B	H	B	B	B	B	B	B	B	B	B	B	B	B	B	B	B	B	B	H	B	B	B	B	B	B	B
ae_C_T_chr14_24187125	14	24187125	-	T/C	B	B	B	H	B	U	H	B	B	B	B	B	B	B	B	A	B	B	B	B	B	B	B	B	B	B	A	B	B	B	B	B	H	B	B	A	B	B	B	H	B	B	B	B	B
ae_C_T_chr14_25602467	14	25602467	-	T/C	U	B	B	B	B	H	B	B	B	H	B	B	B	B	B	H	B	B	B	U	B	B	B	U	B	B	A	U	H	B	B	B	H	B	H	A	B	B	B	A	B	B	B	H	B
ae_C_T_chr14_26094150	14	26094150	-	T/C	B	B	H	B	B	B	B	B	B	H	B	B	B	B	H	B	B	B	B	B	B	B	B	U	B	B	B	B	B	B	B	B	B	B	B	B	B	B	B	B	B	B	B	H	B
ae_C_T_chr14_27547990	14	27547990	-	T/C	B	H	B	A	B	U	B	A	H	A	H	B	H	B	B	H	B	A	H	A	H	H	H	H	B	H	H	H	B	B	B	B	H	B	H	A	A	A	B	H	H	H	B	B	B
ae_C_T_chr14_8570862	14	8570862	-	T/C	H	H	B	A	B	U	B	B	B	A	H	A	H	B	B	A	B	A	B	B	B	U	B	B	H	H	A	H	H	A	U	B	A	B	H	A	H	B	H	A	A	B	B	H	B
ae_C_T_chr14_9959506	14	9959506	-	T/C	H	H	H	H	H	H	H	H	H	H	H	H	H	H	H	H	U	H	H	H	H	H	H	H	H	H	H	H	B	H	H	B	H	H	H	H	U	H	H	H	H	H	H	H	H
ae_C_T_chr15_15563060	15	15563060	+	A/G	B	B	B	B	H	B	B	B	B	B	B	B	B	B	B	B	B	B	B	B	B	B	B	B	B	B	B	B	H	B	B	B	B	B	B	B	B	B	B	B	B	A	B	B	B
ae_C_T_chr15_1736382	15	1736382	-	T/C	B	B	B	B	B	B	B	B	B	B	B	B	H	B	B	H	B	H	B	B	B	B	B	B	B	B	H	B	B	B	B	B	B	B	B	H	B	B	B	B	B	B	B	B	B
ae_C_T_chr15_4659239	15	4659239	-	T/C	H	H	B	B	H	U	U	H	H	H	B	H	H	H	B	H	H	H	U	H	H	H	B	B	H	B	H	B	B	H	B	B	B	H	H	H	B	B	H	H	H	H	H	H	B
ae_C_T_chr15_8137144	15	8137144	-	T/C	H	H	H	H	H	H	H	H	H	H	H	H	H	H	B	U	H	U	H	U	H	H	H	H	H	H	U	H	H	H	H	B	H	H	H	U	H	B	H	H	H	H	H	H	H
ae_C_T_chr15_9672077	15	9672077	-	T/C	B	B	B	B	B	B	B	B	B	B	B	B	B	B	B	B	B	B	B	B	B	B	B	B	B	B	B	B	B	B	B	B	B	B	B	B	B	B	B	B	B	B	B	B	B
ae_C_T_chr16_11478844	16	11478844	-	T/C	B	B	B	H	B	B	B	B	B	B	B	B	B	U	B	B	B	H	B	B	B	H	B	H	B	B	A	B	H	B	B	B	H	B	A	A	B	B	H	A	B	B	B	H	B
ae_C_T_chr16_11907365	16	11907365	+	A/G	B	B	B	B	B	U	U	B	B	B	B	B	B	B	B	B	B	B	B	B	B	B	B	B	B	B	B	B	B	B	B	B	B	B	B	B	B	B	B	B	B	B	B	B	B
ae_C_T_chr16_13071916	16	13071916	-	T/C	B	B	B	H	B	U	B	U	U	B	H	B	B	B	B	U	H	H	H	B	B	B	U	H	B	B	B	H	B	B	B	B	H	B	U	B	B	B	B	B	B	B	B	B	B
ae_C_T_chr16_15358163	16	15358163	-	T/C	B	B	H	B	B	H	B	B	B	B	B	B	B	B	B	H	B	B	B	B	B	B	B	B	B	B	H	H	B	B	B	B	B	B	B	H	B	B	B	H	B	B	B	B	B
ae_C_T_chr16_20314337	16	20314337	-	T/C	H	H	U	H	H	H	H	H	H	H	H	H	H	H	B	H	H	B	H	H	H	H	H	H	H	H	B	H	H	H	H	B	H	H	H	H	U	H	H	H	H	H	H	U	H
ae_C_T_chr16_7100979	16	7100979	-	T/C	A	H	H	B	B	U	H	H	B	B	H	H	A	A	A	A	B	A	H	A	H	A	H	H	B	H	H	H	A	B	B	A	B	H	H	H	H	A	A	H	H	A	B	A	H
ae_C_T_chr16_random_316152	16	316152	-	T/C	B	B	B	B	B	B	H	B	B	B	B	B	B	B	B	B	B	B	B	B	B	B	B	B	B	B	H	B	B	B	B	B	B	B	B	H	B	B	B	B	B	B	B	B	B
ae_C_T_chr17_1232702	17	1232702	-	T/C	B	B	B	B	B	B	B	A	B	B	B	B	B	B	H	U	B	B	B	H	B	B	H	B	H	B	B	B	H	B	B	B	B	B	B	B	A	B	B	B	B	B	B	A	B
ae_C_T_chr17_3193684	17	3193684	-	T/C	H	H	B	H	B	B	B	B	H	B	B	B	B	B	B	B	B	B	H	B	B	H	B	U	H	H	B	B	B	B	A	B	H	B	H	B	H	H	B	B	B	B	H	B	H
ae_C_T_chr17_4691093	17	4691093	+	A/G	B	B	B	B	B	B	B	B	B	B	B	B	B	B	B	B	B	B	B	B	B	B	H	B	B	B	B	B	B	B	B	B	B	B	B	B	B	B	B	B	B	B	B	B	B
ae_C_T_chr18_1708637	18	1708637	-	T/C	B	B	B	B	B	B	H	B	B	B	B	B	B	B	B	B	B	B	B	B	B	B	B	B	B	B	B	B	B	B	B	B	B	B	B	B	B	B	B	B	B	B	B	B	B
ae_C_T_chr18_20281014	18	20281014	-	T/C	B	A	H	A	H	H	B	U	B	H	H	H	H	H	B	U	B	A	A	B	H	A	U	H	U	A	H	H	B	A	A	B	A	U	H	H	H	B	B	H	A	H	A	B	A
ae_C_T_chr18_24643380	18	24643380	-	T/C	H	H	B	B	H	H	H	B	B	H	H	H	H	B	U	H	H	H	B	B	B	B	B	U	B	H	B	B	H	B	B	U	B	B	B	H	B	B	B	B	B	H	B	H	H
ae_C_T_chr18_28099326	18	28099326	+	A/G	B	B	B	B	H	U	H	H	B	B	H	U	B	U	B	H	U	B	H	H	H	H	H	H	H	B	H	H	B	H	B	B	U	B	H	H	B	U	B	U	H	H	B	B	B
ae_C_T_chr18_731856	18	731856	+	A/G	B	B	B	B	B	B	H	B	B	B	B	B	B	B	B	B	B	B	B	B	B	B	B	B	B	B	B	B	B	B	B	B	B	B	B	B	B	B	B	B	B	B	B	B	B
ae_C_T_chr18_8545672	18	8545672	-	T/C	B	H	B	H	H	H	B	B	B	H	B	H	H	B	B	H	B	B	B	B	B	H	H	H	B	H	H	H	H	H	B	B	H	H	B	H	H	B	H	H	H	B	B	B	H
ae_C_T_chr19_11498061	19	11498061	-	T/C	B	H	H	H	B	B	H	H	H	B	B	H	H	H	B	H	H	H	H	H	B	H	B	B	H	H	H	H	B	H	H	B	H	H	B	H	B	B	H	B	H	H	H	H	H
ae_C_T_chr19_15401908	19	15401908	-	T/C	H	A	H	A	A	U	B	H	A	A	A	A	A	A	B	U	A	H	A	H	A	A	H	H	A	A	U	H	B	A	A	B	A	A	A	U	B	U	H	U	A	B	A	B	U
ae_C_T_chr19_16821449	19	16821449	+	A/G	H	H	B	H	H	U	H	H	B	B	B	H	A	B	A	A	B	A	B	B	B	H	B	H	B	H	B	B	A	B	B	A	A	B	H	H	H	B	B	A	H	H	B	A	H
ae_C_T_chr19_17823473	19	17823473	-	T/C	B	B	B	B	B	B	H	B	B	B	B	H	B	B	B	H	B	H	B	H	H	B	H	H	B	B	H	B	B	H	B	B	H	H	H	B	H	H	B	H	B	U	B	B	B
ae_C_T_chr19_19802985	19	19802985	+	A/G	H	A	H	A	A	H	B	H	A	H	A	H	A	A	U	H	B	B	U	A	A	B	B	H	A	A	A	A	H	A	A	B	B	A	A	A	H	H	U	A	H	A	A	B	A
ae_C_T_chr19_3184510	19	3184510	+	A/G	B	H	H	H	H	B	H	H	H	H	H	H	B	H	B	B	H	H	H	H	H	H	H	H	H	H	B	H	H	H	H	B	H	H	H	B	H	H	B	B	H	U	H	B	H
ae_C_T_chr19_4175000	19	4175000	-	T/C	U	H	B	B	A	H	B	H	H	B	A	A	H	H	B	A	B	A	B	B	H	U	B	H	U	A	A	A	B	H	A	B	B	A	A	A	B	U	H	U	H	H	H	U	A
ae_C_T_chr2_4207091	2	4207091	+	A/G	A	A	H	A	B	H	H	H	A	A	H	H	H	A	B	A	A	A	H	H	A	A	H	H	B	A	H	A	B	A	H	B	A	H	A	H	B	B	H	H	A	H	A	H	A
ae_C_T_chr2_6212991	2	6212991	-	T/C	B	B	B	B	H	B	H	B	B	B	B	B	B	B	B	B	B	B	B	B	B	B	B	B	B	B	B	B	B	B	B	B	B	B	B	B	H	B	B	B	B	B	B	B	B
ae_C_T_chr2_684788	2	684788	-	T/C	H	H	B	H	H	H	H	B	B	H	A	H	H	B	B	H	B	H	B	H	B	H	B	H	B	H	H	A	B	H	B	B	H	B	H	H	B	H	H	H	B	A	B	H	H
ae_C_T_chr2_7145174	2	7145174	+	A/G	B	B	B	B	H	B	B	B	B	B	B	B	B	B	B	B	B	H	B	B	B	B	A	B	B	B	B	B	B	B	B	B	B	B	H	B	B	B	B	B	B	B	B	B	B
ae_C_T_chr3_1299778	3	1299778	-	T/C	B	H	H	H	H	H	B	H	H	H	H	H	H	H	B	H	H	H	H	U	H	H	B	H	H	H	H	H	H	H	H	B	H	H	H	H	B	B	B	H	H	H	H	H	H
ae_C_T_chr3_8428695	3	8428695	+	A/G	B	H	B	B	B	B	H	B	B	B	B	B	B	B	H	B	B	A	B	B	B	B	B	B	B	B	B	H	H	B	B	B	B	B	H	H	B	B	H	H	B	B	B	B	B
ae_C_T_chr4_2170526	4	2170526	-	T/C	H	B	B	H	U	B	B	B	B	B	B	B	H	B	B	A	B	A	B	B	H	H	H	H	B	H	H	B	H	H	H	B	H	U	B	B	H	B	H	B	H	H	H	H	H
ae_C_T_chr4_23602042	4	23602042	-	T/C	B	B	B	B	B	B	B	B	B	B	B	B	B	B	H	B	B	B	B	B	B	B	B	B	B	B	B	B	B	B	B	H	B	B	B	B	H	U	B	B	B	B	B	B	B
ae_C_T_chr4_4578811	4	4578811	-	T/C	H	B	B	H	H	B	B	H	B	B	H	H	B	B	B	B	B	B	A	B	A	B	H	H	A	H	B	H	B	H	A	B	H	B	B	B	H	B	B	B	H	H	H	B	B
ae_C_T_chr4_738383	4	738383	+	A/G	B	B	B	B	B	B	B	B	B	B	B	B	B	B	B	B	B	H	B	B	B	B	B	B	B	B	B	B	B	B	B	B	B	B	B	B	B	B	B	B	B	B	B	B	B
ae_C_T_chr5_18798110	5	18798110	-	T/C	B	H	B	H	B	B	B	B	U	U	U	H	B	H	B	B	H	B	U	B	H	U	B	B	H	H	B	H	B	H	H	B	U	B	B	B	B	B	B	B	U	U	H	B	U
ae_C_T_chr5_3649267	5	3649267	-	T/C	B	B	B	B	B	B	B	B	B	B	B	B	B	B	B	B	B	B	B	B	B	B	B	B	B	B	B	B	B	B	B	B	B	B	B	B	B	B	B	B	B	B	B	B	B
ae_C_T_chr5_7573595	5	7573595	-	T/C	B	B	B	B	B	B	H	B	B	B	B	B	B	B	B	B	B	H	B	B	B	H	B	B	B	B	B	H	B	B	B	B	B	B	H	B	B	B	B	B	B	B	B	H	B
ae_C_T_chr5_8094465	5	8094465	+	A/G	B	B	H	B	B	B	H	B	B	B	B	H	H	B	B	B	B	B	B	U	U	B	U	B	B	H	B	B	B	U	B	B	H	B	B	B	B	B	B	B	H	B	B	B	H
ae_C_T_chr5_9048060	5	9048060	-	T/C	B	H	B	H	B	H	H	B	B	H	B	B	H	B	B	H	B	B	B	B	B	H	B	H	B	H	H	H	B	H	B	B	H	B	B	H	B	B	H	H	H	B	B	H	H
ae_C_T_chr5_9554337	5	9554337	-	T/C	H	B	B	B	B	U	B	B	B	B	B	H	B	H	B	B	B	B	B	B	H	B	B	B	H	B	B	B	B	B	B	B	B	H	B	B	B	B	B	B	B	B	B	B	B
ae_C_T_chr6_13418549	6	13418549	+	A/G	H	H	H	B	U	U	H	U	H	B	B	U	U	B	B	B	B	U	B	B	B	U	B	U	H	H	H	B	H	H	B	B	U	B	U	H	B	B	U	H	H	B	U	H	H
ae_C_T_chr6_14410760	6	14410760	+	A/G	B	B	B	B	B	B	B	B	B	B	B	B	B	B	B	B	B	B	B	B	B	B	B	B	B	B	B	B	B	B	B	B	B	B	B	H	B	B	B	H	B	B	B	B	B
ae_C_T_chr6_18798120	6	18798120	-	T/C	B	B	B	B	B	B	B	B	B	B	B	B	B	B	B	B	B	B	B	B	B	B	B	B	B	B	B	B	B	B	B	B	B	B	B	B	B	B	B	B	B	B	B	B	B
ae_C_T_chr6_19821606	6	19821606	+	A/G	B	B	B	B	B	B	B	B	B	B	B	U	U	B	H	B	B	B	B	B	B	B	U	B	U	B	B	U	B	B	U	B	B	B	B	B	B	U	B	B	B	B	B	B	B
ae_C_T_chr6_20275907	6	20275907	+	A/G	B	B	B	B	B	B	B	B	B	B	B	B	B	B	B	B	B	B	B	B	B	B	B	B	B	B	B	B	H	B	B	B	B	B	B	B	B	B	B	B	B	H	B	B	B
ae_C_T_chr6_6151691	6	6151691	-	T/C	B	B	B	B	B	B	B	B	B	B	B	B	B	B	B	B	B	B	B	B	B	B	B	B	B	B	B	B	B	B	B	B	B	B	B	B	B	B	B	B	B	B	B	B	B
ae_C_T_chr6_6561546	6	6561546	+	A/G	B	B	B	B	B	B	B	B	B	B	B	B	B	B	B	B	B	B	B	B	B	B	B	B	B	B	B	B	B	B	H	B	B	B	B	B	B	B	B	B	B	H	B	B	B
ae_C_T_chr6_8548027	6	8548027	+	A/G	B	B	B	B	B	U	H	B	B	B	B	B	B	B	B	B	B	B	B	B	B	B	B	B	B	B	B	B	B	B	B	B	B	B	B	B	B	B	B	B	B	B	B	B	B
ae_C_T_chr7_11451080	7	11451080	-	T/C	B	B	B	B	B	U	H	B	B	B	B	B	B	B	B	B	B	B	B	B	B	B	B	B	B	B	B	B	B	B	B	B	U	B	U	B	B	B	B	B	B	B	B	B	B
ae_C_T_chr7_13055383	7	13055383	+	A/G	B	B	B	B	B	B	B	B	B	B	B	B	B	B	B	B	B	B	B	B	B	B	B	B	B	B	B	B	B	B	B	B	B	H	B	B	B	B	B	B	B	H	B	B	B
ae_C_T_chr7_14877833	7	14877833	-	T/C	B	B	B	B	B	B	B	B	B	B	B	B	B	B	B	B	B	B	B	B	B	B	B	B	B	B	B	B	B	B	B	B	B	B	B	B	B	B	B	B	B	B	B	B	B
ae_C_T_chr7_19252919	7	19252919	+	A/G	B	B	B	B	B	B	H	B	B	B	B	B	B	B	B	B	U	B	U	B	B	B	B	B	B	B	B	B	B	B	B	B	B	B	B	B	B	B	B	B	B	B	B	B	U
ae_C_T_chr8_11915730	8	11915730	-	T/C	B	B	B	H	B	U	H	B	B	B	B	B	H	B	A	H	B	H	B	B	B	B	B	B	B	B	H	B	H	B	B	B	H	B	H	H	H	B	B	H	B	H	B	B	B
ae_C_T_chr8_12405612	8	12405612	+	A/G	H	B	B	H	H	U	H	H	B	H	B	B	B	B	B	A	B	H	B	B	B	H	B	B	B	B	A	B	B	A	B	A	H	B	H	A	B	B	A	A	B	B	B	A	B
ae_C_T_chr8_19223758	8	19223758	-	T/C	B	B	B	H	B	B	U	B	H	B	B	B	B	B	B	B	B	B	B	B	B	H	H	H	B	H	H	H	H	U	B	B	H	B	B	H	H	B	H	H	H	H	H	U	B
ae_C_T_chr8_257399	8	257399	-	T/C	H	H	B	H	B	H	B	B	B	H	B	H	H	B	B	A	B	A	B	B	B	H	B	U	B	H	A	H	B	H	B	B	A	B	H	A	B	B	H	A	H	B	B	H	B
ae_C_T_chr9_10536058	9	10536058	+	A/G	B	B	H	B	B	B	B	B	B	B	B	B	B	B	B	B	B	B	H	B	B	B	B	B	B	B	B	H	B	B	B	B	B	B	B	H	B	B	B	H	B	A	B	B	B
ae_C_T_chr9_11099124	9	11099124	-	T/C	H	H	H	H	B	H	B	H	H	H	H	H	H	B	U	H	H	B	H	H	H	B	H	H	H	H	H	H	U	H	H	U	H	H	H	H	U	H	B	H	H	H	H	H	H
ae_C_T_chr9_12948624	9	12948624	-	T/C	H	H	H	H	B	H	B	H	B	H	B	B	A	B	A	A	H	H	B	B	B	H	A	H	B	B	A	H	A	B	B	A	H	B	H	A	A	H	A	A	B	H	B	A	B
ae_C_T_chr9_14427040	9	14427040	-	T/C	H	H	H	H	B	H	H	H	B	B	B	H	H	B	H	H	B	H	H	B	H	H	B	H	B	B	H	B	H	H	H	H	H	H	H	H	H	B	H	H	H	H	H	H	B
ae_C_T_chr9_19840231	9	19840231	-	T/C	B	B	B	B	B	B	B	B	B	B	H	B	B	U	B	B	H	B	B	B	B	B	B	B	B	B	B	U	B	B	B	B	B	B	B	B	B	B	B	B	B	B	B	B	B
ae_C_T_chr9_20411010	9	20411010	-	T/C	H	H	H	B	H	H	H	B	H	H	B	B	H	H	B	H	B	H	B	B	B	H	H	H	H	H	H	B	H	H	B	H	H	B	H	H	H	B	B	H	H	H	H	H	H
ae_C_T_chr9_2225124	9	2225124	+	A/G	A	B	B	B	H	B	B	B	B	B	U	U	B	A	B	B	B	B	B	B	H	B	U	B	B	B	B	B	B	B	A	B	B	B	B	B	B	B	B	B	B	B	B	B	B
ae_C_T_chrUn_11424446	UN	11424446	-	T/C	A	H	B	H	A	H	H	H	A	A	A	A	H	A	B	H	A	A	A	A	A	A	H	A	A	A	H	A	H	A	A	B	H	A	A	H	H	H	H	H	A	A	A	H	H
ae_C_T_chrUn_13375345	UN	13375345	-	T/C	H	H	B	B	B	B	H	B	B	A	H	B	H	H	B	B	H	H	A	H	H	H	H	H	B	B	U	H	B	H	B	B	B	H	B	H	H	B	B	U	B	B	H	H	B
ae_C_T_chrUn_21735774	UN	21735774	-	T/C	B	H	B	H	B	B	B	B	B	H	B	H	B	B	B	H	B	B	H	B	H	H	B	H	B	H	H	B	B	B	H	U	H	H	B	H	B	U	B	B	B	B	B	B	H
ae_C_T_chrUn_31784492	UN	31784492	-	T/C	B	B	B	B	B	B	B	B	B	B	B	B	B	B	B	B	B	B	U	U	B	B	B	B	B	B	B	B	B	B	B	B	B	B	B	B	B	B	B	B	B	H	B	B	B
ae_C_T_chrUn_39289213	UN	39289213	-	T/C	B	B	B	B	B	B	B	B	B	B	B	B	B	B	H	B	B	B	B	B	B	B	B	B	B	B	B	B	B	B	B	B	B	B	B	B	H	B	H	B	B	B	B	B	B
ae_C_T_chrUn_8262021	UN	8262021	-	T/C	B	H	H	H	U	B	B	H	H	B	H	H	H	H	B	B	B	H	B	U	H	B	U	B	B	H	B	H	B	U	B	B	U	B	H	B	H	U	H	H	U	B	H	B	H
ae_G_A_chr1_13964176	1	13964176	-	T/C	A	A	B	B	B	B	B	B	B	A	U	B	H	B	B	H	B	B	B	B	B	A	B	B	B	B	H	B	B	A	B	B	B	B	B	H	B	B	B	H	A	B	B	H	B
ae_G_A_chr1_16901068	1	16901068	+	A/G	B	B	B	B	B	B	H	B	B	B	B	B	B	B	B	B	B	A	B	B	B	B	H	B	B	B	B	B	H	H	B	B	B	B	H	B	B	B	H	B	B	H	B	B	B
ae_G_A_chr1_5144110	1	5144110	+	A/G	A	A	A	A	A	A	A	A	A	A	A	A	B	A	B	A	A	A	A	A	A	A	A	A	A	A	U	A	H	A	A	H	A	A	A	U	A	A	B	A	A	A	A	A	A
ae_G_A_chr1_745121	1	745121	+	A/G	B	B	B	B	B	B	B	B	B	B	B	B	B	B	B	B	B	B	B	B	B	B	B	B	B	B	B	B	B	B	B	B	B	B	B	B	B	B	B	B	B	B	B	B	B
ae_G_A_chr10_11518237	10	11518237	-	T/C	B	B	B	B	B	H	B	B	B	B	B	H	B	B	B	U	B	A	B	B	B	H	B	B	B	B	U	H	B	B	B	B	H	B	B	U	H	B	B	U	B	B	B	B	B
ae_G_A_chr10_14974827	10	14974827	-	T/C	H	H	H	H	H	H	B	H	H	H	H	H	B	H	B	B	H	B	H	H	H	B	H	H	H	H	B	H	B	H	H	B	H	H	H	B	B	H	B	B	H	H	H	B	H
ae_G_A_chr10_16403065	10	16403065	+	A/G	B	B	B	B	B	B	B	B	B	B	B	B	B	B	B	B	B	H	B	B	B	B	B	B	B	B	B	B	B	B	H	B	B	B	B	B	B	B	B	B	B	B	B	B	B
ae_G_A_chr10_5178423	10	5178423	+	A/G	A	A	A	A	A	A	A	A	A	A	A	A	A	A	A	A	A	A	A	A	A	A	A	A	A	A	A	A	A	A	A	A	A	A	A	A	A	A	H	A	A	A	A	A	A
ae_G_A_chr10_6657762	10	6657762	+	A/G	B	B	B	B	B	B	B	B	B	B	B	H	B	B	B	U	B	B	B	H	B	B	B	B	B	B	B	B	B	B	B	B	B	B	B	B	B	B	B	B	B	B	B	B	B
ae_G_A_chr10_7063400	10	7063400	+	A/G	B	B	B	B	B	H	H	B	B	B	B	B	B	B	U	B	B	B	B	B	B	B	B	B	B	B	B	B	B	B	B	B	B	B	B	B	B	B	B	B	B	B	B	B	B
ae_G_A_chr10_7547524	10	7547524	+	A/G	B	B	B	B	B	B	H	B	B	B	B	B	B	B	B	B	B	H	B	B	B	B	B	B	B	B	B	B	H	H	B	B	B	B	B	A	H	B	B	A	B	U	B	B	B
ae_G_A_chr10_790360	10	790360	+	A/G	B	B	B	B	B	B	B	B	B	B	B	B	B	B	B	B	B	B	B	B	B	B	B	B	B	B	B	B	B	B	B	B	B	B	B	B	B	B	B	B	B	H	B	B	B
ae_G_A_chr10_9055589	10	9055589	+	A/G	B	B	B	B	B	B	B	B	B	B	B	B	B	B	B	B	B	B	B	B	B	B	B	B	B	B	B	B	B	B	B	B	B	B	B	B	B	B	B	B	B	B	B	B	U
ae_G_A_chr11_13792532	11	13792532	-	T/C	B	H	B	A	B	H	H	B	B	H	B	B	H	B	B	A	B	A	B	B	B	H	B	H	B	H	A	H	H	H	B	B	A	B	H	A	B	H	H	A	H	B	B	H	B
ae_G_A_chr11_15180475	11	15180475	-	T/C	B	H	H	H	B	U	B	B	H	H	B	B	B	B	B	H	B	B	B	A	H	H	A	U	B	H	H	H	B	B	B	B	H	B	H	A	H	A	H	H	H	B	B	B	H
ae_G_A_chr11_17142988	11	17142988	-	T/C	B	H	B	H	B	B	B	B	B	H	B	B	B	B	B	B	B	H	B	B	B	B	B	H	B	H	B	H	B	B	B	B	H	B	B	B	B	B	B	B	H	B	B	B	B
ae_G_A_chr11_2653758	11	2653758	-	T/C	B	H	B	H	B	H	H	B	B	B	B	B	B	B	B	B	B	B	B	B	B	B	B	B	B	B	H	B	B	B	B	B	H	B	B	H	B	B	B	B	H	A	B	B	B
ae_G_A_chr11_3133753	11	3133753	+	A/G	B	B	B	B	B	B	B	B	B	B	B	B	B	B	B	B	B	B	B	B	B	B	B	B	B	B	B	B	B	B	B	B	B	B	B	B	B	B	B	B	B	B	B	B	B
ae_G_A_chr11_6538306	11	6538306	+	A/G	H	H	A	B	A	U	H	H	A	B	A	A	B	A	B	B	A	H	A	H	A	H	A	H	A	H	B	H	B	H	A	B	B	A	H	B	B	A	B	B	H	A	A	B	A
ae_G_A_chr11_722816	11	722816	+	A/G	B	B	B	B	B	B	B	B	B	B	B	B	B	B	B	B	B	B	B	B	B	B	B	B	B	B	B	B	B	B	B	B	B	B	B	B	B	B	B	B	B	H	B	B	B
ae_G_A_chr11_9373684	11	9373684	-	T/C	B	B	B	B	B	B	B	B	B	B	B	B	B	B	B	B	B	B	B	B	B	B	B	B	B	B	B	B	B	B	B	B	B	B	B	B	B	B	B	B	B	B	B	B	B
ae_G_A_chr12_11809331	12	11809331	-	T/C	B	U	B	B	B	B	B	B	B	B	H	H	B	B	B	B	B	B	B	H	U	B	U	H	H	B	U	U	B	B	H	B	B	U	H	U	H	H	B	B	B	B	B	B	B
ae_G_A_chr12_14681873	12	14681873	-	T/C	H	H	H	H	H	H	H	H	H	H	H	H	B	H	H	H	H	H	H	B	H	B	H	H	H	H	B	H	H	H	H	U	H	U	H	H	H	H	H	H	H	H	H	H	H
ae_G_A_chr12_5999407	12	5999407	-	T/C	B	H	H	B	B	B	B	B	B	B	B	B	B	B	B	B	B	H	B	B	B	B	B	B	B	H	B	B	B	H	B	B	B	B	B	B	B	B	H	B	H	B	B	B	H
ae_G_A_chr13_10487138	13	10487138	-	T/C	H	H	H	H	H	H	H	H	B	H	H	H	H	H	B	H	H	H	H	B	H	H	H	H	H	H	H	H	H	H	H	B	H	H	H	H	B	H	H	H	H	H	H	H	H
ae_G_A_chr13_16810548	13	16810548	+	A/G	B	B	B	B	B	B	B	B	B	B	B	B	B	B	B	B	H	H	B	B	B	B	B	B	B	B	B	B	B	B	H	B	B	B	B	B	B	B	B	B	B	B	B	B	B
ae_G_A_chr13_17736241	13	17736241	-	T/C	U	B	B	H	B	U	H	H	B	B	B	H	B	B	H	H	B	H	B	B	B	B	B	B	H	B	B	B	B	B	B	B	B	H	U	B	B	U	B	B	B	B	B	B	B
ae_G_A_chr13_21755293	13	21755293	-	T/C	B	B	B	B	B	B	B	H	B	B	B	B	B	H	B	B	B	H	B	H	H	B	B	U	B	B	H	H	B	B	B	B	H	H	H	H	H	H	B	H	B	H	B	B	B
ae_G_A_chr13_22251550	13	22251550	-	T/C	H	H	B	B	B	H	B	B	H	B	B	B	H	H	B	H	H	H	H	H	H	H	B	H	H	H	H	H	B	H	B	B	B	B	B	H	B	B	H	H	H	B	H	B	H
ae_G_A_chr13_3659759	13	3659759	-	T/C	B	B	B	B	B	U	H	B	B	B	B	B	B	B	B	B	B	B	B	H	B	B	H	B	B	B	B	B	B	B	B	B	B	B	B	B	B	B	B	B	B	B	B	B	B
ae_G_A_chr13_729960	13	729960	+	A/G	B	B	H	A	B	U	B	B	B	H	B	B	B	B	B	A	B	B	B	B	B	H	B	B	B	B	H	B	B	H	B	B	A	B	B	A	B	B	H	H	H	B	B	B	B
ae_G_A_chr13_8578178	13	8578178	+	A/G	H	H	B	B	A	B	B	H	B	H	H	A	B	H	H	B	B	B	B	A	B	B	A	H	B	B	B	H	H	B	B	H	B	B	H	H	H	A	H	B	B	H	B	A	B
ae_G_A_chr14_10528310	14	10528310	+	A/G	B	B	B	B	B	B	B	B	B	B	B	B	B	B	B	B	B	B	B	B	B	B	B	B	B	B	H	B	B	B	B	B	B	B	B	H	B	B	B	B	B	B	B	B	B
ae_G_A_chr14_12531924	14	12531924	-	T/C	B	B	H	H	H	B	A	H	B	B	A	B	A	H	H	A	A	A	B	A	H	H	A	H	B	B	H	B	H	H	H	H	H	B	B	A	H	H	H	U	U	H	H	B	H
ae_G_A_chr14_14921777	14	14921777	+	A/G	B	H	H	B	B	H	U	H	H	B	B	B	B	B	H	B	H	B	B	B	B	B	B	U	B	H	H	B	H	H	H	B	B	H	B	U	B	B	H	B	B	B	H	H	H
ae_G_A_chr14_17329040	14	17329040	+	A/G	B	H	B	B	B	B	B	B	B	H	B	B	B	B	B	B	B	H	B	B	B	H	B	U	B	H	H	H	B	B	B	B	B	B	H	H	H	U	B	B	H	B	B	B	B
ae_G_A_chr14_23709326	14	23709326	-	T/C	H	B	B	H	B	B	B	B	H	B	H	H	B	A	B	B	A	B	H	B	H	H	B	U	B	H	B	B	B	B	A	B	H	H	B	B	B	B	B	B	B	B	H	B	H
ae_G_A_chr14_2680535	14	2680535	+	A/G	B	H	B	A	B	H	B	B	H	B	B	B	B	B	B	B	B	B	B	B	B	A	B	B	B	H	B	B	B	A	B	B	H	B	B	B	B	B	H	B	A	B	H	B	H
ae_G_A_chr14_27086237	14	27086237	+	A/G	B	H	H	B	H	H	H	H	A	B	A	A	B	A	B	B	B	H	H	B	H	H	B	B	B	H	H	B	B	H	A	B	H	A	H	H	B	H	B	H	H	B	A	B	A
ae_G_A_chr14_3638032	14	3638032	+	A/G	H	H	H	H	H	H	H	H	H	H	U	B	H	H	H	U	B	H	H	H	H	H	B	H	H	H	H	H	U	H	H	B	H	B	U	H	U	H	A	H	H	H	H	H	H
ae_G_A_chr15_11606748	15	11606748	-	T/C	B	B	B	B	B	B	B	B	B	B	B	B	B	B	B	B	B	B	B	B	B	H	B	B	B	H	H	H	H	B	B	B	B	B	B	H	B	B	B	H	B	B	B	H	B
ae_G_A_chr15_17027656	15	17027656	-	T/C	B	H	B	A	B	B	B	H	A	A	H	A	H	A	H	B	A	B	A	A	H	H	A	U	A	H	B	H	H	H	A	B	A	H	A	B	B	A	H	B	H	B	A	B	A
ae_G_A_chr15_20020249	15	20020249	+	A/G	B	B	B	B	H	H	B	B	B	H	B	H	A	H	B	H	B	B	B	B	H	B	B	U	B	B	B	B	B	H	B	B	B	H	B	B	H	B	A	B	B	B	B	B	B
ae_G_A_chr15_3715739	15	3715739	+	A/G	H	H	H	H	H	H	H	H	H	H	H	H	H	H	B	H	H	H	H	H	H	H	H	H	H	H	H	H	H	H	H	U	H	H	H	H	H	H	H	H	H	H	H	H	H
ae_G_A_chr15_5683236	15	5683236	-	T/C	H	H	H	H	H	B	H	H	H	H	H	H	H	H	B	H	H	H	H	H	H	H	H	H	H	H	H	H	H	H	H	B	H	H	H	H	B	H	U	H	H	H	H	H	H
ae_G_A_chr15_7161538	15	7161538	-	T/C	B	B	B	B	B	B	B	B	B	B	B	H	B	B	B	B	B	B	B	H	B	B	B	B	B	B	B	B	B	B	B	B	B	B	B	B	B	B	B	B	B	B	B	B	B
ae_G_A_chr16_16331689	16	16331689	-	T/C	B	B	H	B	B	B	H	B	B	B	B	B	H	B	B	B	B	B	B	B	B	B	B	B	B	B	H	B	H	B	B	B	B	B	B	B	B	B	B	H	B	B	B	B	B
ae_G_A_chr16_17306068	16	17306068	-	T/C	B	B	B	B	B	B	B	B	B	B	B	B	B	B	B	B	B	B	B	B	B	B	B	H	B	B	B	B	B	H	B	B	B	B	B	B	B	B	B	B	B	B	B	H	B
ae_G_A_chr16_1767279	16	1767279	+	A/G	B	B	B	B	B	B	B	B	B	B	B	B	B	B	B	B	B	B	B	B	B	B	B	H	B	B	B	B	B	B	B	B	B	B	B	B	B	B	B	B	B	B	B	H	B
ae_G_A_chr16_18792971	16	18792971	-	T/C	B	B	B	B	B	B	B	B	B	B	B	B	B	B	B	B	B	H	B	B	B	B	B	B	H	B	B	B	B	B	B	B	B	H	B	B	B	B	B	B	B	B	B	B	B
ae_G_A_chr16_20731146	16	20731146	+	A/G	B	B	B	A	B	U	B	B	B	B	U	B	B	B	B	A	B	B	U	B	B	B	U	B	U	B	B	A	B	U	B	B	U	B	B	B	B	U	B	B	B	B	U	B	B
ae_G_A_chr16_2684169	16	2684169	+	A/G	B	B	B	B	B	B	B	B	B	B	B	B	B	B	B	B	B	B	B	B	B	B	B	B	B	B	B	B	B	B	B	B	B	B	B	B	B	B	B	B	B	B	B	B	B
ae_G_A_chr16_8104218	16	8104218	+	A/G	H	B	B	B	B	B	B	B	B	B	B	B	B	B	B	B	B	B	B	B	B	B	B	B	B	B	H	B	B	B	B	B	B	B	B	H	B	B	B	H	B	B	B	B	B
ae_G_A_chr17_12501521	17	12501521	-	T/C	B	B	B	B	B	B	B	H	B	B	B	B	H	B	B	B	B	B	B	B	B	B	H	B	B	B	B	B	B	B	B	B	B	B	B	B	H	B	B	B	B	B	B	B	B
ae_G_A_chr17_14864872	17	14864872	+	A/G	B	B	H	B	H	B	H	H	B	B	B	B	B	B	H	B	B	B	B	B	B	B	B	H	B	B	B	B	H	B	B	A	B	B	B	B	B	B	B	B	B	B	B	H	B
ae_G_A_chr17_1723730	17	1723730	-	T/C	B	B	A	H	B	H	H	B	B	A	H	H	H	B	B	A	B	A	H	A	B	H	B	U	B	B	A	A	B	B	H	B	H	B	B	A	B	B	H	A	B	H	B	B	B
ae_G_A_chr17_5143443	17	5143443	+	A/G	B	B	B	B	B	B	B	B	B	B	B	B	B	B	B	B	B	B	B	B	B	B	B	B	B	B	B	B	B	B	B	B	B	B	B	B	B	B	B	B	B	B	B	B	B
ae_G_A_chr17_6143950	17	6143950	+	A/G	H	H	B	B	A	B	H	H	A	B	A	A	H	A	B	B	A	H	A	H	A	H	B	H	A	H	B	B	B	H	A	B	H	A	H	B	H	B	B	B	H	H	A	H	H
ae_G_A_chr17_7095090	17	7095090	-	T/C	B	B	H	B	B	B	B	H	B	B	B	B	B	B	B	B	B	B	H	B	B	B	B	B	B	B	B	B	H	B	B	B	B	B	B	B	B	B	H	H	B	B	B	H	B
ae_G_A_chr17_9063850	17	9063850	+	A/G	B	B	B	B	B	B	B	B	B	H	B	B	B	B	B	B	B	B	B	B	B	B	B	U	B	B	H	B	B	B	B	B	B	B	H	B	B	B	H	H	B	B	B	B	B
ae_G_A_chr18_11005801	18	11005801	-	T/C	B	B	B	B	B	B	H	B	U	B	B	B	B	B	B	B	B	B	B	B	B	B	B	B	B	B	B	B	B	B	B	B	B	B	B	B	B	B	B	B	B	B	B	B	B
ae_G_A_chr18_14380454	18	14380454	+	A/G	H	B	B	B	B	B	B	B	B	B	B	B	B	B	B	B	H	B	B	B	H	B	B	U	H	B	B	U	B	B	B	B	B	B	B	B	B	B	B	B	B	B	B	B	B
ae_G_A_chr18_17349338	18	17349338	+	A/G	B	H	B	H	B	A	H	B	U	H	B	B	B	B	B	H	B	U	B	B	B	B	H	U	B	H	H	H	B	H	B	B	H	B	B	H	B	B	B	H	H	B	B	H	H
ae_G_A_chr18_25653210	18	25653210	-	T/C	B	H	H	H	B	B	B	B	A	B	B	B	B	B	B	B	B	B	B	B	H	B	B	H	B	H	B	B	B	H	B	H	H	H	B	B	H	B	B	B	H	H	A	B	H
ae_G_A_chr18_29078922	18	29078922	+	A/G	H	B	H	H	H	H	B	H	B	B	B	H	B	B	B	B	B	A	A	B	B	B	B	B	B	B	H	A	H	A	H	B	H	H	B	B	B	A	H	B	B	H	H	B	B
ae_G_A_chr18_3658766	18	3658766	-	T/C	B	B	B	B	B	B	U	B	B	B	B	B	B	B	B	B	B	H	B	B	B	B	B	B	B	B	B	B	B	B	B	B	B	B	B	B	B	B	B	B	B	B	B	B	B
ae_G_A_chr18_5609746	18	5609746	-	T/C	B	B	B	B	B	H	H	H	B	B	B	B	B	B	B	B	B	B	B	B	B	B	B	B	B	B	B	B	B	B	B	B	B	B	B	B	B	B	B	B	B	B	B	B	B
ae_G_A_chr18_random_2744018	18	2744018	+	A/G	B	B	B	B	B	A	B	B	B	B	B	B	B	B	B	H	B	B	B	B	B	B	B	B	B	B	B	B	B	B	B	B	B	B	B	B	B	B	B	B	B	B	B	B	B
ae_G_A_chr18_random_3386348	18	3386348	+	A/G	A	H	B	A	A	H	B	B	A	H	B	B	H	A	B	B	H	B	A	B	A	B	H	H	H	H	A	H	H	H	A	B	A	H	A	B	H	B	H	H	A	A	H	H	H
ae_G_A_chr19_10514363	19	10514363	-	T/C	H	H	B	B	B	B	B	B	B	H	H	U	H	B	B	B	B	B	B	U	B	H	U	H	B	H	H	H	B	H	H	B	B	H	B	H	B	B	H	H	H	B	B	H	B
ae_G_A_chr19_16378709	19	16378709	-	T/C	H	B	B	B	H	B	H	B	B	H	B	B	B	B	B	B	B	H	H	H	H	H	B	H	B	B	U	B	H	B	B	H	H	H	H	H	B	B	B	B	B	H	B	H	B
ae_G_A_chr19_20817564	19	20817564	+	A/G	H	B	H	B	H	B	H	H	H	U	U	H	H	H	H	H	H	H	U	H	U	H	H	H	H	B	H	H	H	H	H	H	H	H	H	H	H	H	H	B	H	U	H	H	B
ae_G_A_chr19_212383	19	212383	-	T/C	B	B	B	B	U	B	B	B	B	B	B	B	B	B	B	B	B	B	B	B	B	B	B	B	B	B	B	B	H	B	B	B	B	B	B	B	B	B	B	B	B	B	B	B	B
ae_G_A_chr19_8552840	19	8552840	+	A/G	B	B	B	B	B	B	H	B	B	B	B	B	B	B	B	B	B	B	B	B	B	B	B	B	B	B	B	B	B	B	B	B	B	B	B	B	B	B	B	B	B	B	B	B	B
ae_G_A_chr19_9535449	19	9535449	-	T/C	H	A	H	A	A	H	B	H	A	A	A	H	H	A	U	A	A	B	A	A	A	H	A	H	A	A	A	H	H	H	A	B	A	A	H	A	H	A	B	A	A	A	A	B	A
ae_G_A_chr2_13046659	2	13046659	+	A/G	H	B	B	B	H	B	H	B	H	B	B	B	H	H	B	B	B	H	H	B	B	H	B	B	H	B	H	U	H	B	B	B	B	B	U	B	B	H	B	H	B	H	B	H	B
ae_G_A_chr2_18023306	2	18023306	-	T/C	B	B	B	B	B	B	B	B	B	H	B	B	B	B	B	B	B	B	B	B	B	B	B	U	B	B	B	B	B	B	B	B	B	B	B	B	B	B	B	B	H	B	B	B	H
ae_G_A_chr2_3173947	2	3173947	-	T/C	B	B	B	B	B	B	B	B	B	B	B	B	B	H	B	B	B	B	H	B	B	B	B	B	B	B	B	B	B	B	B	B	B	B	B	B	B	B	B	B	B	B	B	B	B
ae_G_A_chr2_4715740	2	4715740	-	T/C	B	H	B	B	B	B	B	B	B	H	B	B	B	B	B	H	B	A	H	B	B	B	B	U	B	H	B	B	B	B	B	B	B	B	H	B	B	B	B	B	B	B	B	B	H
ae_G_A_chr2_5683137	2	5683137	+	A/G	B	B	B	H	B	B	H	U	B	B	B	B	B	B	U	A	B	B	B	H	H	H	H	B	B	B	H	B	H	H	B	H	B	B	B	H	B	H	H	H	H	B	H	B	H
ae_G_A_chr2_9411474	2	9411474	-	T/C	H	H	B	H	H	H	H	B	U	H	H	H	B	H	B	H	H	B	H	H	H	H	H	H	H	H	U	H	B	B	B	B	H	B	H	B	B	H	B	U	H	U	H	H	H
ae_G_A_chr3_15701125	3	15701125	+	A/G	A	A	H	A	A	A	A	A	A	U	A	A	H	U	B	A	A	A	U	A	U	A	U	A	A	A	B	A	B	A	U	B	A	H	A	A	A	U	H	U	A	A	A	A	A
ae_G_A_chr3_18083815	3	18083815	+	A/G	B	H	B	H	B	H	H	H	B	B	B	B	B	B	B	H	B	B	B	B	B	H	H	B	B	B	H	B	B	B	B	B	H	B	B	H	H	H	B	H	B	B	B	B	B
ae_G_A_chr3_18510549	3	18510549	-	T/C	B	B	H	B	B	B	H	H	B	B	B	B	H	B	A	B	B	B	B	B	B	B	B	B	B	B	H	B	B	B	B	B	B	B	B	B	B	B	B	H	B	B	B	H	B
ae_G_A_chr3_2196949	3	2196949	-	T/C	B	H	B	H	H	U	B	B	B	H	H	B	H	B	B	A	B	H	B	B	B	H	B	B	H	H	A	H	B	B	B	B	A	H	H	A	B	B	B	A	H	H	B	H	H
ae_G_A_chr3_3630309	3	3630309	-	T/C	B	B	B	B	B	B	H	B	B	B	B	B	B	B	B	B	B	B	B	B	B	B	B	B	B	B	B	B	B	B	B	B	B	B	B	B	B	B	B	B	B	B	B	B	B
ae_G_A_chr3_6983646	3	6983646	-	T/C	B	B	B	B	H	B	B	B	B	B	H	B	B	B	B	B	B	B	B	B	B	B	B	B	H	B	B	B	B	H	B	B	B	B	B	B	B	B	B	B	B	B	B	B	B
ae_G_A_chr3_7935347	3	7935347	-	T/C	H	B	B	H	B	U	H	B	B	B	B	B	B	B	B	B	B	B	B	B	B	B	B	B	B	B	A	B	B	H	B	B	B	B	B	A	B	B	H	A	B	B	B	H	B
ae_G_A_chr4_17281785	4	17281785	+	A/G	B	B	B	B	B	B	B	B	B	B	B	B	B	B	B	B	B	B	B	B	B	B	B	B	B	B	B	B	H	B	B	B	B	B	B	H	B	B	B	B	B	B	B	B	B
ae_G_A_chr4_17743239	4	17743239	-	T/C	B	B	B	B	B	B	H	B	B	B	B	B	B	B	B	B	B	B	B	B	B	B	B	B	B	B	B	B	B	B	B	B	B	B	B	B	B	B	B	B	B	B	B	B	B
ae_G_A_chr4_20191525	4	20191525	+	A/G	H	B	B	B	B	H	H	B	B	B	B	B	B	B	B	B	B	B	B	B	B	B	B	B	B	B	B	B	B	B	H	B	B	B	B	B	B	B	B	B	B	B	B	H	U
ae_G_A_chr4_20750085	4	20750085	-	T/C	H	H	H	H	A	B	B	H	A	H	A	H	B	A	B	B	A	B	A	A	A	A	A	A	A	H	B	H	B	H	A	B	U	A	H	B	B	H	B	B	H	H	A	B	B
ae_G_A_chr4_22160093	4	22160093	+	A/G	B	B	B	B	H	B	B	B	B	B	B	U	B	B	B	B	B	B	B	B	B	B	B	B	B	B	B	H	B	B	B	B	B	B	B	B	B	B	B	B	B	B	B	B	B
ae_G_A_chr4_6088748	4	6088748	-	T/C	A	A	H	A	A	A	A	H	A	A	A	H	H	A	B	A	A	A	A	A	A	A	A	A	A	H	H	A	B	A	A	B	A	A	A	A	A	A	U	A	A	U	A	U	B
ae_G_A_chr4_8522504	4	8522504	+	A/G	B	B	B	B	B	U	H	B	B	B	B	B	B	B	B	B	H	B	B	B	B	B	B	B	B	B	B	B	B	B	B	B	B	B	B	B	B	B	B	B	B	B	B	B	B
ae_G_A_chr5_13916997	5	13916997	+	A/G	B	B	B	B	B	B	B	B	B	B	B	B	B	B	B	U	B	B	B	B	B	B	B	B	B	B	B	H	B	B	B	B	H	B	B	U	B	B	B	B	B	B	B	B	B
ae_G_A_chr5_14378563	5	14378563	+	A/G	B	B	B	A	H	B	H	B	B	B	B	B	B	B	B	H	B	H	B	B	B	B	B	B	B	B	B	B	B	B	B	B	H	B	B	B	H	B	B	B	H	B	B	B	B
ae_G_A_chr5_21270879	5	21270879	+	A/G	H	A	H	B	H	B	B	B	A	B	B	H	B	A	B	B	B	H	B	H	B	B	B	H	B	A	B	B	B	H	B	B	B	B	B	B	B	H	B	B	A	H	A	H	A
ae_G_A_chr5_22267971	5	22267971	-	T/C	H	H	B	H	H	H	B	H	U	H	A	U	H	B	B	A	B	H	B	U	H	H	A	H	H	H	H	H	U	B	U	B	H	H	H	H	B	H	B	H	H	B	B	H	H
ae_G_A_chr5_23204037	5	23204037	+	A/G	B	B	B	H	B	U	H	B	B	B	B	B	B	B	B	B	B	H	B	B	B	H	B	B	B	B	B	B	B	B	B	B	B	B	H	B	B	B	B	B	B	B	B	B	B
ae_G_A_chr5_279247	5	279247	+	A/G	A	A	H	A	B	H	H	U	U	A	A	A	H	U	H	A	A	A	A	H	A	A	H	H	U	A	A	A	B	A	A	B	A	H	A	A	H	A	H	A	A	A	U	H	A
ae_G_A_chr5_5557577	5	5557577	+	A/G	B	B	B	B	B	B	H	H	B	B	H	B	B	B	B	B	B	B	B	H	H	B	H	H	H	B	B	H	H	B	B	B	B	B	B	B	H	B	B	B	B	H	B	B	B
ae_G_A_chr5_random_127400	5	127400	+	A/G	B	B	B	B	H	B	B	B	B	B	B	B	B	B	B	B	B	B	B	B	B	B	B	H	B	B	B	B	B	B	B	B	B	B	B	B	B	H	B	B	B	B	B	B	B
ae_G_A_chr6_3696932	6	3696932	+	A/G	B	H	H	B	H	B	B	B	B	A	B	H	B	A	B	B	H	B	A	B	A	B	B	H	B	H	B	B	B	B	H	B	B	H	B	B	H	B	B	B	B	H	H	B	H
ae_G_A_chr6_4153548	6	4153548	-	T/C	B	B	B	B	H	B	B	H	B	B	B	H	H	B	B	B	B	B	B	B	B	B	B	B	A	B	B	B	B	B	B	B	B	H	H	B	H	B	B	B	B	B	B	H	B
ae_G_A_chr6_755352	6	755352	+	A/G	H	H	B	H	H	H	B	H	H	A	H	H	H	A	A	H	A	A	H	A	H	A	A	H	H	H	H	H	H	B	H	B	B	A	A	B	H	A	H	H	H	H	B	B	H
ae_G_A_chr7_1677797	7	1677797	+	A/G	B	H	H	H	H	H	H	H	H	H	H	H	H	H	B	H	H	H	H	B	H	H	B	H	H	H	H	H	B	H	H	B	H	H	H	H	B	B	H	H	H	H	H	B	H
ae_G_A_chr7_17303545	7	17303545	-	T/C	B	B	B	B	B	B	B	B	B	B	A	H	B	H	B	B	H	A	B	B	H	H	B	B	B	B	B	B	B	B	B	B	B	H	B	B	B	B	B	B	B	B	B	B	B
ae_G_A_chr7_3169303	7	3169303	-	T/C	B	B	H	H	B	B	B	B	B	B	B	B	B	B	U	B	H	B	A	B	H	B	B	B	B	B	B	B	B	H	B	B	B	B	B	B	B	B	B	B	H	B	H	B	B
ae_G_A_chr7_5126819	7	5126819	-	T/C	B	B	B	B	B	B	B	B	B	B	B	B	B	B	B	B	B	B	B	B	B	B	B	B	U	B	B	B	B	B	B	B	B	B	B	B	B	B	B	B	B	B	B	B	B
ae_G_A_chr7_9488793	7	9488793	-	T/C	B	B	B	B	B	B	B	B	B	B	B	B	B	B	B	B	B	B	B	B	B	B	B	B	B	B	B	B	B	B	B	B	B	B	B	B	B	B	B	B	B	B	B	B	B
ae_G_A_chr8_10953490	8	10953490	-	T/C	B	B	B	B	B	B	B	B	B	B	B	B	B	B	B	B	B	B	B	B	B	B	B	B	B	B	B	B	B	B	B	B	B	B	B	B	B	B	B	B	B	H	B	B	B
ae_G_A_chr8_13374975	8	13374975	+	A/G	B	B	B	B	B	B	B	B	B	B	B	A	B	B	B	B	B	B	U	B	B	B	B	B	B	B	B	B	B	B	B	B	B	B	H	B	B	B	B	B	B	H	B	B	B
ae_G_A_chr8_1684263	8	1684263	+	A/G	B	B	B	B	H	B	H	B	B	B	B	B	B	B	B	B	B	B	B	B	B	B	B	B	B	B	B	B	H	B	B	B	B	B	B	B	B	B	B	B	B	B	B	B	B
ae_G_A_chr8_18235668	8	18235668	+	A/G	B	B	B	B	B	B	B	B	B	B	B	B	B	B	B	B	B	B	B	B	B	B	B	B	B	B	B	B	B	B	B	B	B	B	B	B	B	B	B	B	B	H	B	B	B
ae_G_A_chr8_21161935	8	21161935	-	T/C	H	H	H	H	B	U	H	B	H	H	H	A	A	A	B	A	A	A	A	H	H	H	B	U	B	H	H	H	H	H	A	B	H	A	A	H	A	B	B	H	H	H	H	H	A
ae_G_A_chr8_8520557	8	8520557	-	T/C	A	H	H	A	A	A	B	B	A	A	A	U	A	H	B	A	H	A	A	B	U	U	A	H	A	A	A	A	B	H	H	B	A	H	H	A	H	U	H	A	A	H	U	H	A
ae_G_A_chr9_19322980	9	19322980	+	A/G	B	B	B	B	B	H	B	B	B	B	B	B	B	B	B	B	B	B	B	B	B	B	B	B	B	B	B	B	B	B	B	B	B	B	B	B	B	B	B	B	B	B	B	B	B
ae_G_A_chr9_2698879	9	2698879	-	T/C	B	B	H	B	B	B	H	B	B	B	U	H	H	H	H	B	H	B	B	H	B	H	H	B	B	B	B	B	B	B	B	H	B	B	B	B	H	B	H	B	B	B	B	B	B
ae_G_A_chr9_7573501	9	7573501	+	A/G	B	B	H	H	B	B	H	B	H	H	B	B	B	U	U	B	H	B	B	U	B	B	B	U	B	H	U	B	B	B	B	B	H	B	B	U	H	B	H	B	H	B	H	B	B
ae_G_A_chr9_9479351	9	9479351	+	A/G	B	B	B	B	B	B	H	B	B	B	B	B	B	B	B	B	B	B	B	B	B	B	B	B	B	B	B	B	B	H	B	B	B	B	B	H	B	B	H	H	B	B	B	B	B
ae_G_A_chrUn_16798123	UN	16798123	-	T/C	H	H	H	H	H	H	H	H	H	H	H	H	H	H	B	H	H	H	H	H	H	H	H	H	H	H	H	H	B	H	H	U	H	H	H	H	H	H	H	H	H	H	H	H	H
ae_G_A_chrUn_1755582	UN	1755582	-	T/C	H	A	H	H	A	B	B	H	H	A	A	H	B	H	B	B	A	B	A	B	A	H	B	A	A	A	H	B	B	A	A	B	H	A	B	H	B	B	H	H	A	H	A	B	A
ae_G_A_chrUn_24727967	UN	24727967	-	T/C	B	B	B	B	B	B	B	B	B	B	B	B	B	B	B	B	B	B	B	B	B	B	B	B	B	B	B	B	B	B	B	B	B	B	B	B	B	B	B	B	B	B	B	B	B
ae_G_A_chrUn_2770990	UN	2770990	-	T/C	B	B	B	B	B	B	H	B	B	B	B	B	B	B	B	B	B	B	B	B	B	B	B	B	B	B	B	B	B	B	B	B	B	B	B	B	B	H	B	B	B	B	B	B	B
ae_G_A_chrUn_27768149	UN	27768149	-	T/C	B	B	B	B	B	B	H	B	B	B	B	B	B	B	B	B	B	B	B	B	B	B	B	B	B	B	B	B	B	B	B	B	B	B	H	B	B	B	B	B	B	B	B	B	B
ae_G_A_chrUn_32363458	UN	32363458	+	A/G	H	H	H	H	H	B	B	H	A	H	H	B	B	B	B	B	A	B	B	B	H	H	H	H	H	H	H	H	B	H	H	B	H	H	B	H	B	B	H	H	A	H	A	H	H
ae_G_A_chrUn_39819168	UN	39819168	+	A/G	B	B	B	B	B	B	H	H	B	B	B	B	H	B	B	H	B	B	B	B	B	B	B	B	B	B	B	B	B	B	B	A	B	B	B	B	B	B	B	B	B	B	B	B	B
ae_G_A_chrUn_40084471	UN	40084471	+	A/G	B	B	B	B	B	B	B	B	B	B	B	B	B	B	B	B	B	H	B	B	B	B	U	B	B	B	B	B	B	B	B	B	B	B	B	B	B	B	B	B	B	B	B	B	B
ae_G_A_chrUn_42896631	UN	42896631	-	T/C	B	B	B	B	B	B	B	B	B	B	B	B	B	B	B	B	B	B	B	B	B	B	B	B	B	B	A	B	B	B	B	B	B	B	H	H	B	B	B	H	B	H	B	B	B
ae_G_T_chr1_12492270	1	12492270	+	A/C	H	H	H	A	A	A	H	H	A	A	A	H	H	A	B	H	A	A	A	H	A	A	H	H	A	A	B	H	B	H	A	B	A	A	A	H	H	H	B	B	H	H	A	B	A
ae_G_T_chr10_11053133	10	11053133	-	T/G	B	B	B	B	B	B	B	B	B	B	B	B	H	B	B	H	B	B	B	B	B	B	B	B	B	B	H	B	B	H	B	B	B	B	B	B	B	B	B	H	B	B	B	B	B
ae_G_T_chr10_1239020	10	1239020	+	A/C	B	B	B	B	B	B	B	B	B	B	B	B	B	B	B	B	B	B	B	B	B	B	B	B	B	B	B	B	H	B	B	B	B	B	B	B	H	B	B	B	B	B	B	B	B
ae_G_T_chr11_7532030	11	7532030	-	T/G	B	H	H	H	H	H	H	H	H	H	H	H	B	H	B	B	H	B	H	B	H	H	B	H	H	H	H	H	B	H	H	B	H	H	H	H	B	B	B	H	H	H	H	B	H
ae_G_T_chr12_16582490	12	16582490	+	A/C	H	H	H	H	H	H	H	H	B	H	H	H	H	H	H	H	H	H	U	H	H	H	H	H	H	H	H	U	H	H	H	H	H	H	H	H	H	H	H	H	U	H	B	H	H
ae_G_T_chr13_11952742	13	11952742	+	A/C	H	H	B	H	B	H	H	H	B	H	H	H	H	H	B	H	H	H	H	H	B	H	H	U	U	H	H	A	B	H	H	B	B	H	H	H	H	H	H	H	H	H	H	H	H
ae_G_T_chr14_18318907	14	18318907	-	T/G	B	B	B	B	B	B	H	B	B	B	B	B	B	B	B	B	B	B	B	B	B	B	B	B	B	B	B	B	B	B	B	B	B	B	B	B	B	B	B	B	B	B	B	B	B
ae_G_T_chr14_4158319	14	4158319	-	T/G	H	A	H	H	B	H	A	H	H	B	B	B	H	B	H	A	A	B	H	H	B	H	H	U	B	A	A	H	A	H	H	H	H	H	B	H	H	H	H	H	H	H	H	B	H
ae_G_T_chr15_12197010	15	12197010	+	A/C	H	B	B	B	B	H	B	B	B	H	B	B	B	H	B	B	B	B	B	B	B	B	B	H	H	B	B	A	B	B	B	B	H	B	B	B	B	B	B	B	B	B	B	B	B
ae_G_T_chr17_16882965	17	16882965	+	A/C	U	B	B	H	H	H	B	H	B	H	H	B	B	H	B	B	H	B	B	H	B	B	B	H	H	B	H	U	B	B	B	B	B	H	B	B	B	B	B	B	B	H	B	U	B
ae_G_T_chr18_21263416	18	21263416	-	T/G	B	B	H	B	B	B	H	H	B	B	H	B	B	B	A	A	B	H	B	B	A	H	H	B	B	B	U	B	B	B	B	H	B	B	H	U	H	B	U	U	B	H	B	B	B
ae_G_T_chr19_5139537	19	5139537	-	T/G	B	H	B	H	H	H	B	H	B	B	B	H	H	B	B	U	B	H	B	B	B	H	H	U	H	H	H	H	H	H	B	B	H	H	B	H	H	H	H	B	H	H	B	H	H
ae_G_T_chr2_8165879	2	8165879	-	T/G	B	B	B	B	B	B	B	B	B	B	B	B	B	B	B	H	B	B	B	B	B	B	B	B	B	B	B	B	B	B	B	B	B	B	B	B	B	B	B	B	B	B	B	B	B
ae_G_T_chr3_17134310	3	17134310	-	T/G	H	B	H	H	A	U	H	B	H	B	H	H	H	A	A	A	H	A	B	H	H	B	H	B	H	B	B	B	H	B	H	H	H	B	B	H	H	A	H	B	B	H	H	H	B
ae_G_T_chr3_5544070	3	5544070	+	A/C	B	B	B	B	B	B	B	B	B	B	B	B	B	B	B	B	B	H	B	B	B	B	B	B	B	B	H	B	B	B	B	B	B	B	B	H	B	B	B	H	B	B	B	B	B
ae_G_T_chr3_random_526900	3	526900	+	A/C	A	A	H	A	A	U	B	H	A	A	A	A	H	A	B	A	A	B	A	A	A	A	A	A	A	A	A	A	B	A	A	B	A	A	A	A	H	A	H	A	A	A	A	H	A
ae_G_T_chr4_13422551	4	13422551	+	A/C	B	B	B	B	B	B	B	B	U	B	B	B	B	B	B	B	B	B	B	B	B	B	B	B	B	B	B	B	B	B	U	B	B	B	B	U	B	B	B	B	B	B	U	B	B
ae_G_T_chr4_247785	4	247785	+	A/C	B	U	B	B	B	B	B	B	B	U	B	U	B	A	B	B	B	A	B	B	B	B	B	B	B	B	H	B	B	B	U	B	B	B	U	B	B	B	B	B	B	B	B	B	B
ae_G_T_chr5_24707579	5	24707579	-	T/G	B	B	B	B	H	B	B	B	B	H	B	B	B	B	B	B	B	B	B	B	B	B	B	H	B	B	B	B	H	B	B	B	B	B	H	B	H	B	B	H	B	B	B	B	B
ae_G_T_chr5_7085423	5	7085423	+	A/C	B	B	B	B	B	B	B	B	B	B	B	B	B	B	B	B	B	B	B	B	B	B	B	B	B	B	B	B	B	B	B	B	B	B	H	B	B	B	B	B	B	B	B	H	B
ae_G_T_chr6_2202847	6	2202847	-	T/G	B	B	B	B	B	B	B	B	B	B	B	B	B	B	B	B	B	B	B	B	B	B	B	B	B	B	B	B	B	B	B	B	B	B	B	B	B	B	B	B	B	B	B	B	B
ae_G_T_chr7_9996357	7	9996357	-	T/G	B	B	B	B	B	B	B	B	B	B	B	B	B	B	B	B	B	B	B	B	B	B	B	B	B	B	H	B	B	B	B	B	B	B	B	H	B	B	B	H	B	B	B	B	B
ae_G_T_chr8_9001168	8	9001168	+	A/C	H	H	H	H	H	H	U	U	H	H	H	H	U	H	B	H	H	H	H	H	H	H	H	H	H	H	H	H	U	H	U	B	H	H	H	H	U	H	U	H	H	H	H	U	H
ae_G_T_chr9_4165585	9	4165585	+	A/C	H	H	B	B	H	B	B	H	A	H	A	H	B	H	B	B	H	B	A	B	A	H	B	H	H	H	B	H	B	H	A	B	H	H	A	B	B	B	B	B	H	H	H	B	A
ae_G_T_chrUn_18404031	UN	18404031	-	T/G	B	B	B	H	B	B	H	H	B	B	B	B	U	B	B	H	B	B	B	B	H	B	B	H	B	B	B	B	H	B	B	B	H	H	B	B	H	B	B	B	B	B	B	B	B
ae_G_T_chrUn_27275496	UN	27275496	+	A/C	H	H	B	H	A	B	B	H	A	H	A	H	B	A	H	B	A	B	A	A	A	H	A	H	A	H	H	H	B	H	A	B	H	A	B	H	H	A	B	H	H	H	A	B	A
ae_G_T_chrUn_38214230	UN	38214230	-	T/G	B	H	B	B	B	H	B	B	B	B	B	B	B	B	B	H	B	A	B	B	B	H	B	B	B	B	H	H	H	H	H	B	B	B	B	H	H	B	H	H	B	B	B	B	B
ae_G_T_chrUn_9268896	UN	9268896	+	A/C	H	H	H	H	H	H	H	H	H	H	H	H	H	H	B	H	H	H	H	H	H	H	H	H	H	H	H	H	H	H	H	B	H	H	H	H	H	H	H	H	H	H	H	H	H
ae_T_C_chr1_10024059	1	10024059	-	T/C	A	A	B	A	A	U	B	A	A	A	A	B	B	A	A	A	A	B	A	A	A	A	A	H	A	B	B	B	A	B	A	A	A	A	A	B	A	A	A	B	A	B	A	A	B
ae_T_C_chr1_14975908	1	14975908	+	A/G	A	A	H	H	A	H	A	A	A	A	A	A	A	A	A	H	A	H	A	A	A	A	A	U	A	H	H	H	A	A	A	A	H	A	A	H	A	A	A	H	A	A	A	A	H
ae_T_C_chr1_15943292	1	15943292	-	T/C	A	A	A	A	A	A	A	A	A	A	A	A	A	A	A	A	A	A	A	A	A	A	A	A	A	A	A	A	A	A	A	A	A	A	A	A	A	A	A	A	A	A	A	A	A
ae_T_C_chr1_19832137	1	19832137	+	A/G	A	A	A	A	A	A	A	A	A	A	A	A	A	A	A	H	A	A	A	A	A	A	A	A	A	A	A	A	A	A	A	A	A	A	A	A	A	A	A	A	A	A	A	A	A
ae_T_C_chr1_20819501	1	20819501	+	A/G	A	A	A	H	A	H	H	A	A	A	A	A	A	A	A	H	A	A	A	A	A	H	A	A	A	A	H	A	A	H	A	A	H	A	A	H	A	A	A	H	A	A	A	A	H
ae_T_C_chr1_21777172	1	21777172	+	A/G	H	H	H	H	A	A	H	H	B	A	H	A	H	H	A	H	A	H	A	B	H	B	B	U	H	H	H	A	H	A	A	B	B	H	H	H	B	B	A	H	H	H	A	H	A
ae_T_C_chr1_random_488154	1	488154	+	A/G	H	H	A	H	B	A	H	H	B	H	B	H	A	B	A	A	B	A	B	B	B	H	B	H	B	H	A	H	A	H	B	A	H	B	H	A	H	B	A	A	H	H	B	A	H
ae_T_C_chr10_4104669	10	4104669	-	T/C	A	H	A	H	A	H	H	H	H	H	A	A	H	A	A	B	A	H	A	H	A	H	A	H	H	H	H	H	H	H	A	A	H	H	H	H	H	H	H	H	H	H	A	H	A
ae_T_C_chr11_10429475	11	10429475	-	T/C	A	A	A	A	A	A	A	A	A	A	A	A	A	A	A	A	A	H	A	A	A	A	A	A	A	A	A	A	A	A	A	A	A	A	H	A	A	A	A	A	A	A	A	A	A
ae_T_C_chr11_19063644	11	19063644	-	T/C	A	A	A	A	A	A	H	A	A	A	A	A	A	A	A	A	A	A	A	A	A	A	A	A	A	A	A	A	H	A	A	A	A	A	A	A	A	A	A	A	A	H	A	A	A
ae_T_C_chr12_7486346	12	7486346	+	A/G	A	A	A	A	A	A	A	A	A	A	A	A	A	A	A	A	A	A	A	A	A	A	A	A	A	A	A	A	A	A	A	A	A	A	A	A	A	A	A	A	A	H	A	A	A
ae_T_C_chr13_18292134	13	18292134	-	T/C	A	A	A	A	A	A	A	A	A	A	A	H	A	A	A	A	H	H	A	H	A	A	A	A	A	A	A	A	A	A	A	A	A	A	A	A	H	A	A	A	A	A	A	A	A
ae_T_C_chr13_18753907	13	18753907	+	A/G	U	H	B	B	A	H	A	H	A	H	A	B	A	H	A	H	H	A	H	A	U	H	B	H	A	B	A	A	B	B	H	A	H	A	H	A	A	H	B	A	B	A	B	B	B
ae_T_C_chr13_248917	13	248917	-	T/C	H	A	A	B	A	U	H	A	A	H	A	A	H	A	A	B	A	H	A	A	A	H	A	U	A	H	B	B	A	H	A	A	B	A	A	B	A	A	H	H	H	A	A	H	A
ae_T_C_chr13_3174274	13	3174274	-	T/C	A	A	A	A	A	A	H	A	A	A	A	H	A	A	A	A	A	A	A	A	A	A	A	A	A	A	A	A	A	A	A	A	A	A	A	A	A	A	A	A	A	A	A	A	A
ae_T_C_chr13_5118258	13	5118258	+	A/G	A	A	A	H	A	H	A	A	A	A	A	A	A	A	A	A	A	A	A	A	A	A	A	A	A	A	A	A	H	A	A	A	A	A	A	A	H	A	A	A	A	A	A	H	A
ae_T_C_chr13_6592984	13	6592984	+	A/G	A	A	A	A	A	U	H	A	A	A	A	A	H	A	A	H	A	H	A	A	A	A	A	A	A	A	A	A	A	A	A	A	A	A	A	A	A	A	A	A	A	U	A	A	A
ae_T_C_chr13_9028929	13	9028929	-	T/C	A	A	A	A	A	A	H	A	A	A	A	A	A	A	A	A	A	A	A	A	A	A	A	A	A	A	A	A	H	A	A	H	A	A	A	A	H	A	A	A	A	A	A	A	A
ae_T_C_chr14_16305233	14	16305233	-	T/C	B	B	H	B	B	B	H	B	B	B	B	B	B	B	A	A	B	B	B	B	B	B	B	H	B	B	B	B	A	B	H	U	B	B	B	A	H	B	B	H	B	B	B	H	B
ae_T_C_chr14_17815269	14	17815269	+	A/G	A	A	A	A	A	A	A	A	A	A	A	A	A	A	A	A	A	A	A	A	A	A	A	A	A	A	A	A	A	A	A	A	A	A	A	A	A	A	A	A	A	A	A	A	A
ae_T_C_chr14_24654531	14	24654531	-	T/C	H	H	A	H	A	U	H	H	A	H	A	H	B	A	H	B	A	A	A	A	A	H	A	H	A	H	B	H	H	H	A	H	H	A	H	H	A	A	H	H	H	A	A	H	A
ae_T_C_chr14_5051298	14	5051298	-	T/C	H	A	A	A	A	A	H	A	A	H	B	A	H	H	A	A	A	B	H	H	H	A	A	H	A	A	A	A	H	A	H	A	A	H	A	A	A	A	A	H	A	H	A	H	A
ae_T_C_chr14_6091664	14	6091664	+	A/G	A	A	A	A	A	A	H	A	A	H	A	A	A	A	A	A	A	A	A	A	A	H	A	U	A	A	H	A	H	H	A	A	A	A	A	H	A	A	A	A	A	A	A	A	A
ae_T_C_chr15_10095251	15	10095251	+	A/G	A	A	A	A	A	A	A	A	A	A	A	A	A	A	A	A	A	A	A	A	A	A	A	A	A	A	A	A	A	A	A	A	A	A	A	A	A	A	A	A	A	A	A	A	A
ae_T_C_chr15_11116590	15	11116590	+	A/G	A	H	H	H	A	H	A	A	A	A	A	H	H	A	A	H	A	A	A	A	A	A	A	A	A	H	H	H	H	H	A	A	H	A	A	H	A	A	H	H	H	A	A	H	A
ae_T_C_chr15_16033159	15	16033159	-	T/C	A	A	A	A	A	H	H	A	A	A	A	A	A	A	A	U	A	A	A	A	A	A	A	A	A	A	A	A	A	A	A	A	A	A	A	A	A	A	A	A	A	A	A	A	A
ae_T_C_chr15_18976465	15	18976465	-	T/C	A	A	A	A	A	A	H	A	A	A	A	A	A	A	A	A	A	H	A	A	A	A	A	A	A	A	A	A	A	A	A	A	A	A	A	A	A	A	A	A	A	A	A	A	A
ae_T_C_chr15_4164209	15	4164209	-	T/C	U	H	H	A	H	H	A	H	H	H	H	U	H	H	A	H	H	A	H	H	H	H	H	H	A	H	H	H	A	A	H	A	H	H	H	H	U	H	A	H	B	H	H	H	H
ae_T_C_chr15_8657008	15	8657008	-	T/C	A	A	A	B	A	A	A	A	A	A	A	A	H	A	A	H	A	A	A	U	A	A	A	A	U	H	B	H	A	A	A	A	H	A	A	B	A	A	A	A	A	A	A	A	A
ae_T_C_chr16_14830632	16	14830632	-	T/C	H	H	A	H	H	A	A	A	B	B	A	H	A	B	A	A	B	A	B	B	B	H	B	H	A	H	A	A	A	H	B	A	H	B	A	A	A	B	A	A	H	A	B	A	A
ae_T_C_chr16_16818141	16	16818141	+	A/G	A	A	A	A	A	U	A	U	A	A	A	H	A	A	A	H	H	A	A	A	A	B	A	A	H	A	H	A	H	A	B	A	A	A	A	H	A	A	A	H	A	B	A	A	A
ae_T_C_chr16_21697169	16	21697169	-	T/C	A	A	A	A	A	A	A	A	A	A	A	A	A	A	A	A	A	A	A	H	A	A	A	A	A	A	A	A	A	A	A	A	A	A	A	A	A	A	A	A	A	A	A	A	A
ae_T_C_chr16_2173036	16	2173036	+	A/G	A	H	A	H	H	H	A	A	B	A	A	H	H	A	A	A	A	B	A	A	A	A	A	U	H	H	A	A	A	A	A	A	A	A	H	A	A	H	A	A	H	H	A	A	H
ae_T_C_chr16_9570045	16	9570045	-	T/C	B	A	B	A	H	B	H	B	B	H	A	H	A	H	B	H	H	H	A	B	H	H	H	H	H	A	A	H	H	A	H	B	A	H	H	A	H	A	A	A	A	H	A	H	A
ae_T_C_chr17_6596171	17	6596171	+	A/G	A	A	A	A	A	A	A	H	A	A	A	A	U	A	A	A	A	B	A	A	A	A	A	A	A	A	A	A	A	A	A	H	A	A	H	A	A	A	A	A	A	U	A	H	A
ae_T_C_chr17_8562681	17	8562681	-	T/C	A	A	A	A	A	U	H	A	A	A	A	A	H	U	H	H	A	A	U	A	A	A	A	A	A	A	A	H	A	H	A	A	A	A	B	A	H	A	A	A	A	A	A	A	A
ae_T_C_chr18_10011661	18	10011661	-	T/C	H	B	U	B	H	H	A	H	B	B	B	B	U	B	H	B	B	A	B	B	B	B	B	B	B	B	B	B	A	B	B	A	B	B	U	B	A	B	U	B	B	B	B	U	B
ae_T_C_chr18_1272563	18	1272563	-	T/C	A	A	H	H	H	U	A	A	A	A	A	A	H	A	A	B	A	A	A	A	A	H	A	A	A	A	B	H	H	H	A	H	H	A	A	B	A	A	H	H	A	A	A	H	A
ae_T_C_chr18_18812981	18	18812981	+	A/G	H	B	B	B	B	B	H	H	B	B	B	B	B	B	B	B	B	B	B	B	B	B	B	B	B	B	B	B	H	B	B	A	B	B	B	B	H	B	B	B	B	B	B	H	B
ae_T_C_chr18_20770629	18	20770629	+	A/G	A	A	A	A	A	A	A	A	A	A	A	A	A	A	A	A	A	H	A	H	A	A	A	A	A	A	A	A	A	A	A	A	A	A	A	A	A	A	A	A	A	H	A	A	A
ae_T_C_chr18_2190733	18	2190733	+	A/G	A	A	A	A	A	A	A	A	A	A	A	A	A	A	A	U	A	A	A	A	A	A	A	A	A	A	A	U	A	A	A	A	A	A	A	A	A	A	A	A	A	U	A	A	A
ae_T_C_chr18_4606097	18	4606097	-	T/C	A	A	A	A	A	A	H	A	A	A	A	A	A	A	A	A	A	A	A	A	A	A	A	A	A	A	A	A	A	A	A	A	A	A	A	A	A	A	A	A	A	A	A	A	A
ae_T_C_chr18_8106198	18	8106198	+	A/G	A	A	A	A	A	A	H	A	A	A	A	A	H	A	A	A	A	A	A	A	A	A	A	A	A	A	H	H	A	A	A	A	A	A	A	H	A	A	A	A	H	A	A	A	A
ae_T_C_chr18_random_4848695	18	4848695	+	A/G	A	A	H	H	H	H	H	A	H	A	H	H	A	A	A	H	A	A	A	H	U	A	H	A	H	H	A	H	H	A	A	A	H	A	A	A	A	H	A	A	A	A	H	A	H
ae_T_C_chr19_750836	19	750836	+	A/G	A	H	A	H	A	A	H	A	A	A	A	H	A	A	A	H	H	H	A	A	A	H	H	A	A	A	H	A	H	A	A	A	H	A	A	H	H	U	A	H	H	H	A	A	A
ae_T_C_chr2_1222166	2	1222166	-	T/C	H	H	H	H	H	U	H	U	B	H	A	H	H	A	A	A	H	H	H	H	A	H	H	H	A	H	H	H	H	H	H	A	H	A	A	H	H	A	H	H	H	A	B	H	H
ae_T_C_chr2_2215096	2	2215096	+	A/G	A	A	A	A	H	A	A	A	A	A	A	A	A	A	A	A	A	A	A	A	A	A	A	A	A	A	A	A	H	A	A	A	A	A	A	A	H	A	A	A	A	A	A	A	A
ae_T_C_chr2_262262	2	262262	+	A/G	A	A	A	A	A	U	H	A	A	A	A	A	A	A	A	A	A	A	A	A	A	A	A	A	A	A	A	A	A	A	A	A	A	A	A	A	A	A	A	A	A	A	A	A	A
ae_T_C_chr2_5111337	2	5111337	-	T/C	A	A	A	A	A	A	H	A	A	A	A	A	A	A	A	A	A	A	A	A	A	A	A	A	A	A	A	A	A	A	A	A	A	A	A	A	A	A	A	A	A	A	A	A	A
ae_T_C_chr2_7674702	2	7674702	+	A/G	A	H	A	A	H	A	H	A	H	H	H	H	H	A	A	A	A	A	H	A	A	H	A	H	A	H	H	A	H	A	H	A	A	H	A	H	A	H	A	H	A	A	A	A	H
ae_T_C_chr3_13237815	3	13237815	-	T/C	H	H	H	H	H	H	A	H	H	H	H	H	A	H	A	H	H	A	H	H	H	H	H	H	H	H	U	H	H	H	H	A	U	H	H	A	H	H	U	H	H	H	H	A	A
ae_T_C_chr3_16164211	3	16164211	+	A/G	B	B	H	B	H	U	H	B	B	A	H	H	A	A	A	A	A	H	H	B	B	A	H	H	H	B	H	H	H	H	H	A	B	B	H	A	A	U	A	H	B	U	B	B	B
ae_T_C_chr3_7657562	3	7657562	-	T/C	B	B	H	B	B	U	H	B	B	B	B	B	H	B	H	B	B	B	B	B	B	B	B	B	B	B	B	B	H	B	B	A	B	B	B	B	H	B	B	B	B	B	B	B	B
ae_T_C_chr4_1215853	4	1215853	-	T/C	A	A	A	H	H	B	H	A	A	A	A	H	A	A	A	B	A	A	A	H	A	A	A	A	A	A	H	H	H	A	A	A	H	A	A	A	A	A	A	A	A	A	A	A	A
ae_T_C_chr4_13911682	4	13911682	-	T/C	A	A	A	A	A	U	B	A	A	A	A	A	A	A	A	A	A	A	A	A	A	A	A	A	A	A	A	A	A	A	A	A	A	A	A	A	A	A	A	A	A	A	A	A	A
ae_T_C_chr4_18754964	4	18754964	-	T/C	A	H	H	H	A	H	H	H	A	H	H	H	H	A	A	H	A	H	H	A	H	H	A	H	H	H	H	H	A	H	H	A	H	H	H	H	A	A	H	H	H	B	A	A	H
ae_T_C_chr4_5114846	4	5114846	-	T/C	A	A	A	A	A	A	H	A	A	A	A	A	A	A	A	U	A	A	A	A	A	A	A	A	A	A	A	A	A	A	A	A	A	A	A	A	A	A	A	A	A	A	A	A	A
ae_T_C_chr4_5603527	4	5603527	-	T/C	H	H	A	H	H	H	A	U	H	H	H	H	H	H	A	H	H	H	H	H	A	H	A	H	H	H	H	H	H	H	A	A	H	A	H	H	A	A	H	H	H	H	H	H	H
ae_T_C_chr4_random_22936	4	22936	-	T/C	B	B	B	B	B	B	B	B	B	H	B	B	B	B	B	B	B	B	B	B	B	B	B	B	B	B	B	B	B	H	B	B	B	B	B	B	B	B	H	B	B	B	B	B	B
ae_T_C_chr5_12606386	5	12606386	-	T/C	H	H	H	H	H	A	H	H	H	H	H	H	A	H	H	A	H	A	H	H	H	A	H	H	H	H	H	H	H	H	A	H	A	H	H	A	A	H	A	H	H	A	H	A	A
ae_T_C_chr5_15914192	5	15914192	-	T/C	H	H	H	H	H	H	H	H	H	H	H	H	A	H	A	H	H	H	H	H	H	A	H	H	U	H	H	H	H	H	H	A	H	A	H	H	H	H	H	H	H	H	H	H	H
ae_T_C_chr5_17361220	5	17361220	-	T/C	H	H	H	B	H	H	H	U	A	B	B	H	B	H	B	A	A	H	H	A	A	B	H	H	H	H	A	B	B	H	H	B	B	B	B	H	B	B	B	A	H	H	A	H	H
ae_T_C_chr5_19322416	5	19322416	+	A/G	H	U	H	A	H	A	A	H	B	U	B	H	A	U	A	A	U	H	B	B	B	H	B	U	B	H	A	B	A	H	B	A	A	B	H	A	U	B	A	A	H	A	B	A	H
ae_T_C_chr5_5119465	5	5119465	-	T/C	A	A	A	A	A	H	H	A	A	A	A	A	A	A	A	A	A	H	A	A	A	A	U	A	A	A	H	A	A	A	A	A	A	A	A	A	A	U	A	A	A	A	A	A	A
ae_T_C_chr5_777390	5	777390	-	T/C	B	B	H	B	H	U	A	H	B	B	B	H	H	B	A	B	B	A	B	H	B	B	B	H	B	B	B	B	H	B	B	A	B	H	H	B	H	B	H	B	B	B	B	H	B
ae_T_C_chr6_10512541	6	10512541	-	T/C	H	H	A	H	A	B	H	A	A	A	A	A	H	A	A	B	A	H	A	A	A	H	A	U	A	H	B	H	H	H	A	A	H	A	H	B	A	A	H	B	H	A	A	H	A
ae_T_C_chr6_1217463	6	1217463	+	A/G	A	A	A	A	A	A	A	A	A	A	A	A	A	A	A	A	A	A	A	A	A	A	A	A	A	A	H	A	H	A	A	A	A	A	A	H	A	A	A	H	A	A	A	A	A
ae_T_C_chr6_18319986	6	18319986	-	T/C	B	B	A	B	B	B	B	B	B	B	B	B	B	B	B	B	U	B	U	B	B	B	B	B	U	B	B	B	B	B	U	B	B	B	B	B	B	U	B	B	B	B	B	B	B
ae_T_C_chr6_244295	6	244295	-	T/C	A	A	A	A	A	A	H	A	A	A	A	A	A	A	A	A	A	A	A	A	A	A	A	A	A	A	A	A	A	A	A	A	A	A	A	A	A	A	A	A	A	A	A	A	A
ae_T_C_chr6_4732955	6	4732955	+	A/G	A	A	A	A	A	A	H	A	A	A	A	A	A	A	A	A	A	A	A	A	A	A	A	A	A	A	A	A	A	A	A	A	A	A	A	A	A	A	A	A	A	A	A	A	A
ae_T_C_chr6_5143861	6	5143861	+	A/G	H	B	H	H	B	U	A	A	B	A	B	H	H	B	A	B	B	B	H	B	B	B	B	H	A	B	H	B	A	H	H	A	B	H	H	B	A	H	A	H	H	A	B	H	B
ae_T_C_chr7_15456899	7	15456899	-	T/C	A	A	A	A	A	A	A	A	A	A	A	A	A	A	A	A	A	A	A	A	A	A	A	A	A	A	A	A	H	A	A	A	A	A	A	A	A	A	A	A	A	A	A	A	A
ae_T_C_chr7_16293707	7	16293707	+	A/G	A	B	H	B	H	U	A	H	B	B	B	H	H	B	A	B	B	B	B	A	B	B	A	H	H	B	B	B	A	B	B	A	B	B	B	B	H	A	H	B	B	H	B	H	B
ae_T_C_chr7_19743504	7	19743504	+	A/G	B	H	H	B	A	B	H	B	B	A	A	H	H	B	H	A	B	B	B	B	B	H	B	H	H	H	B	A	H	B	H	H	B	H	H	B	B	B	B	B	H	B	B	H	B
ae_T_C_chr7_2642620	7	2642620	-	T/C	A	A	A	A	A	A	A	A	A	A	A	A	A	A	A	A	A	A	A	A	A	A	A	A	A	A	A	A	A	A	A	A	A	A	A	A	A	A	A	A	A	A	A	A	A
ae_T_C_chr8_16300429	8	16300429	-	T/C	A	A	A	A	A	A	A	A	A	A	A	A	A	A	A	A	A	A	A	A	A	A	A	A	A	A	A	A	A	A	A	A	A	A	A	A	A	A	A	A	A	A	A	A	A
ae_T_C_chr8_20170300	8	20170300	+	A/G	A	A	A	A	A	H	H	A	A	A	A	A	A	A	A	A	A	A	A	A	A	A	A	A	A	A	A	A	A	A	A	A	A	A	A	A	A	A	A	A	A	A	A	A	A
ae_T_C_chr8_2131956	8	2131956	-	T/C	A	A	A	A	H	A	A	A	A	A	A	A	A	A	A	A	A	A	A	A	A	A	A	A	A	A	H	H	H	A	A	A	A	A	H	H	A	A	A	H	A	A	A	A	A
ae_T_C_chr8_3177014	8	3177014	-	T/C	A	A	A	A	A	A	A	A	A	A	A	A	A	A	A	A	A	A	A	A	A	A	A	A	A	A	A	A	A	A	A	A	A	A	A	A	A	A	A	A	A	A	A	A	A
ae_T_C_chr9_21783518	9	21783518	+	A/G	H	A	A	A	A	A	A	H	A	A	H	A	A	H	A	A	A	A	A	A	H	A	A	H	H	A	A	A	A	A	A	A	A	H	H	A	A	H	A	A	A	B	A	A	A
ae_T_C_chr9_6595215	9	6595215	-	T/C	A	A	A	A	A	H	A	A	A	A	A	A	A	A	A	A	A	A	A	A	A	A	A	A	U	A	A	A	U	A	A	A	A	A	A	A	A	A	A	A	A	A	A	A	A
ae_T_C_chrUn_11790439	UN	11790439	-	T/C	H	B	A	H	A	H	H	H	H	H	H	H	H	B	A	H	B	H	B	A	H	H	H	B	H	H	H	H	H	H	B	H	H	H	H	H	H	H	A	H	B	H	H	H	H
ae_T_C_chrUn_14269716	UN	14269716	+	A/G	H	B	A	B	H	U	A	B	A	B	B	H	H	B	A	B	B	B	B	H	H	B	H	B	H	H	B	B	H	H	H	A	B	B	B	B	H	A	H	B	B	B	H	H	A
ae_T_C_chrUn_17264771	UN	17264771	+	A/G	A	A	A	A	A	A	H	A	A	A	A	A	A	A	A	A	A	A	A	A	A	A	A	A	A	A	A	A	A	A	A	A	A	A	A	A	A	A	A	A	A	A	A	A	A
ae_T_C_chrUn_22835774	UN	22835774	+	A/G	A	A	A	A	A	A	H	A	A	A	A	A	A	A	A	A	A	A	A	A	A	A	A	A	A	A	A	A	A	A	A	A	A	A	A	A	A	A	A	A	A	A	A	A	A
ae_T_C_chrUn_24335852	UN	24335852	-	T/C	A	A	A	A	A	U	H	A	A	A	A	A	A	A	A	A	A	A	A	A	A	A	A	A	H	A	A	A	A	A	A	A	A	A	H	A	A	A	A	A	A	H	A	A	A
ae_T_C_chrUn_29280711	UN	29280711	+	A/G	A	H	A	A	U	U	A	A	H	H	A	A	A	A	A	A	A	A	U	A	A	H	H	U	A	H	H	H	A	A	A	A	A	A	H	U	H	A	A	H	A	A	U	A	H
ae_T_C_chrUn_31283091	UN	31283091	+	A/G	A	A	A	A	A	A	A	A	A	A	A	A	A	A	A	A	A	H	A	A	A	A	A	A	A	A	A	A	A	A	A	A	A	A	H	A	A	A	A	A	A	A	A	A	A
ae_T_C_chrUn_38795151	UN	38795151	+	A/G	H	A	A	A	A	A	A	A	A	A	B	H	H	U	A	H	A	A	H	A	H	H	A	H	A	A	H	A	H	A	B	A	A	B	H	H	A	A	A	H	A	A	A	H	A
ae_T_C_chrUn_41217698	UN	41217698	-	T/C	A	A	A	A	A	A	H	A	A	A	A	A	A	A	A	A	A	A	A	A	A	A	A	A	A	A	A	A	A	A	A	A	A	A	A	A	A	A	A	A	A	A	A	A	A
ae_T_C_chrUn_8703605	UN	8703605	+	A/G	A	H	H	H	H	H	A	A	H	H	H	A	H	A	A	H	H	A	A	A	A	A	A	U	H	H	H	H	A	A	H	A	H	H	A	A	H	A	H	A	H	A	H	A	H
ae_T_C_chrUn_9745941	UN	9745941	+	A/G	A	A	A	A	A	A	A	A	A	A	A	A	A	A	A	A	A	A	A	A	A	A	A	A	A	A	A	A	A	A	A	A	A	A	A	A	A	A	A	A	H	A	A	A	A
ae_T_G_chr12_17103642	12	17103642	+	A/C	A	A	A	A	A	A	A	A	A	A	A	A	A	A	A	H	A	A	A	A	A	H	A	A	A	A	A	A	A	A	A	A	A	A	A	A	A	A	A	H	A	A	A	A	A
ae_T_G_chr14_30013569	14	30013569	-	T/G	A	A	A	H	A	H	H	A	A	A	A	A	A	A	A	A	A	H	A	A	A	A	A	A	A	A	A	A	A	A	A	A	A	A	A	A	A	B	A	A	A	A	A	A	A
ae_T_G_chr14_6600937	14	6600937	-	T/G	H	A	A	B	B	A	A	H	A	A	A	B	A	B	A	B	H	H	H	H	A	H	A	H	A	A	B	H	A	H	B	A	H	H	A	B	A	H	A	H	H	A	H	A	H
ae_T_G_chr17_10481364	17	10481364	-	T/G	H	H	H	B	A	B	A	A	A	H	A	A	H	A	A	B	A	A	A	H	A	H	A	U	A	H	B	H	A	H	A	A	H	A	A	B	A	A	H	B	H	A	A	H	H
ae_T_G_chr18_24113733	18	24113733	-	T/G	A	A	A	A	A	H	H	A	A	A	A	A	H	A	A	A	A	H	A	A	A	H	A	A	A	A	H	A	A	A	A	A	A	A	H	H	A	A	H	H	H	H	A	A	A
ae_T_G_chr3_4592204	3	4592204	+	A/C	A	A	A	A	A	A	A	A	A	A	U	A	A	A	A	B	A	A	A	A	A	A	A	A	A	A	U	A	H	A	A	A	U	A	B	U	A	A	A	U	A	A	A	A	A
ae_T_G_chr6_2661166	6	2661166	-	T/G	B	B	H	B	H	U	H	H	B	B	B	B	H	B	A	B	B	B	B	H	B	H	A	B	A	B	B	H	A	B	B	A	B	B	B	B	H	H	H	B	B	A	B	H	B
ae_T_G_chr8_2645579	8	2645579	+	A/C	A	A	A	A	A	A	A	A	A	A	A	A	A	A	A	U	A	A	A	A	A	A	A	A	A	A	A	A	A	A	A	A	A	A	A	A	A	A	A	A	A	A	A	A	A
ae_T_G_chr9_17863698	9	17863698	+	A/C	A	A	A	A	A	A	A	A	A	A	A	A	A	A	A	H	A	A	A	A	A	A	A	A	A	A	A	A	A	A	A	A	A	A	A	A	A	A	A	A	A	A	A	A	A
ae_T_G_chr9_3675855	9	3675855	-	T/G	A	A	A	A	A	A	A	A	A	A	A	A	A	A	A	A	A	A	A	A	A	A	A	H	A	A	A	A	A	H	A	A	A	H	H	A	A	A	H	A	A	H	A	A	A
ae_T_G_chrUn_12270687	UN	12270687	+	A/C	A	H	A	B	A	B	H	A	A	H	A	H	H	A	A	B	A	B	A	A	A	H	A	U	A	H	A	A	A	H	A	A	A	A	A	A	A	A	H	A	H	A	A	A	B
ae_T_G_chrUn_26931671	UN	26931671	+	A/C	A	A	A	A	A	A	A	A	A	A	A	A	A	A	A	A	A	A	A	A	A	A	A	A	A	A	A	A	A	A	A	A	A	A	A	A	A	A	A	A	A	A	A	A	A
ae_T_G_chrUn_37078744	UN	37078744	-	T/G	H	B	A	A	B	A	A	H	B	H	B	H	H	B	A	A	B	A	B	B	B	H	B	H	B	H	H	H	A	H	B	A	H	B	H	H	A	B	A	B	H	B	B	H	B
be_*_A_C_chr6_10644177	6	10644177	+	A/C	H	H	H	H	H	H	H	H	H	H	H	H	H	H	H	H	H	H	H	B	H	H	B	H	H	H	H	H	H	H	H	H	H	H	H	U	B	H	U	H	H	H	H	H	H
be_*_C_T_chr4_215113	4	215113	-	T/C	H	H	A	H	A	H	U	U	H	H	U	H	A	H	A	U	H	H	U	H	H	H	H	H	H	A	H	H	A	H	H	A	H	H	H	H	U	H	A	H	A	H	H	U	A
be_A_C_chr10_15438328	10	15438328	-	T/G	A	A	A	A	A	A	A	A	A	A	A	A	A	A	A	H	A	A	A	A	A	A	A	A	A	A	H	A	A	A	A	A	A	A	A	A	A	A	A	H	A	A	A	A	A
be_A_C_chr11_5504086	11	5504086	+	A/C	A	H	A	H	A	A	A	A	A	A	A	A	A	A	A	A	A	A	A	A	A	A	A	A	A	A	A	A	A	A	A	A	H	A	A	A	A	A	A	A	H	A	A	A	A
be_A_C_chr12_7463478	12	7463478	-	T/G	A	A	A	H	A	A	A	A	A	A	A	A	A	A	A	A	A	A	A	A	A	A	A	A	A	A	A	A	A	A	A	A	H	A	A	A	A	A	A	A	A	A	A	A	A
be_A_C_chr13_1253531	13	1253531	+	A/C	B	H	H	H	H	U	A	H	B	H	A	B	H	H	A	H	H	B	B	B	H	A	B	H	B	H	B	H	H	B	B	A	H	B	B	H	A	B	H	H	H	B	H	H	H
be_A_C_chr13_3155657	13	3155657	+	A/C	A	A	A	A	A	H	A	A	A	H	A	A	A	A	A	H	A	A	A	A	A	H	A	A	A	A	H	A	A	H	A	A	H	A	A	B	A	A	H	B	A	A	A	A	A
be_A_C_chr13_3653872	13	3653872	-	T/G	H	A	H	B	A	H	A	A	A	B	A	A	H	A	A	A	A	A	A	A	A	A	A	A	A	A	A	A	A	A	A	A	B	A	A	H	A	A	A	H	H	A	A	H	A
be_A_C_chr14_11962883	14	11962883	+	A/C	H	U	H	H	H	H	H	H	H	H	H	U	H	H	H	H	H	H	B	B	U	B	H	H	U	U	B	H	H	H	H	H	H	H	H	B	U	U	H	B	H	A	H	H	H
be_A_C_chr14_19729863	14	19729863	+	A/C	H	H	A	A	A	A	A	A	A	A	A	A	A	A	A	A	H	B	A	A	A	A	A	A	A	H	A	A	A	A	A	A	A	A	A	A	A	A	A	A	H	A	A	A	A
be_A_C_chr15_6633562	15	6633562	-	T/G	A	A	A	A	A	A	A	A	A	A	A	A	A	A	A	A	A	A	A	A	A	A	A	A	A	H	A	A	A	A	A	A	A	A	A	A	A	A	A	A	A	A	A	H	A
be_A_C_chr16_13453710	16	13453710	+	A/C	A	A	A	A	A	A	A	A	A	A	A	H	A	A	A	B	A	H	A	H	A	A	A	A	A	A	H	A	A	A	A	A	A	A	A	H	A	A	H	H	A	A	A	A	A
be_A_C_chr16_1685511	16	1685511	-	T/G	H	A	H	H	A	H	A	A	A	A	A	A	H	A	A	H	A	U	A	A	H	A	A	A	H	A	A	A	A	A	A	A	H	A	A	A	A	A	A	A	A	A	A	A	H
be_A_C_chr18_10002696	18	10002696	-	T/G	A	A	A	A	A	A	A	A	A	A	A	A	A	A	A	A	A	A	A	A	A	A	A	H	A	A	A	A	A	H	A	A	A	A	A	H	A	A	H	A	H	A	A	A	A
be_A_C_chr2_14033310	2	14033310	+	A/C	A	A	H	A	A	A	A	H	B	H	H	H	A	B	A	A	H	B	B	B	B	H	B	H	H	A	B	H	A	H	H	A	H	H	H	H	H	B	A	H	A	H	H	A	A
be_A_C_chr4_9885753	4	9885753	+	A/C	A	A	A	A	A	A	A	A	A	A	A	H	A	A	A	A	A	H	A	A	A	H	A	A	A	A	A	A	A	A	A	A	A	A	A	A	A	A	A	A	A	A	A	A	A
be_A_C_chr5_11960037	5	11960037	-	T/G	A	A	A	H	A	A	A	A	A	A	A	A	A	A	A	A	A	A	A	A	A	A	A	A	A	A	H	A	A	A	A	A	H	A	A	B	A	A	A	H	H	A	A	A	A
be_A_C_chr5_15302327	5	15302327	+	A/C	A	A	A	A	A	A	A	A	A	A	A	A	A	A	A	A	A	B	A	A	A	A	A	A	A	A	H	A	A	A	A	A	A	A	H	H	A	A	A	H	A	A	A	A	A
be_A_C_chr5_random_293310	5	293310	+	A/C	A	A	H	H	A	B	H	A	A	H	A	A	H	A	A	H	A	H	A	A	A	H	A	H	A	A	H	A	A	A	A	A	A	A	H	H	H	A	A	H	A	H	A	H	A
be_A_C_chr7_18319099	7	18319099	-	T/G	A	H	A	H	H	U	A	A	A	H	A	H	B	A	H	B	A	B	A	A	A	A	B	H	A	H	H	A	H	A	A	H	H	A	H	H	H	A	A	A	A	U	A	H	A
be_A_C_chr7_2330567	7	2330567	-	T/G	A	A	A	A	A	A	A	A	A	A	A	A	A	A	A	H	A	A	A	A	A	H	A	A	A	A	A	A	A	H	A	U	A	A	A	A	A	A	H	A	A	A	A	A	A
be_A_C_chr7_6568466	7	6568466	+	A/C	A	A	A	A	A	A	A	A	A	A	A	A	A	A	A	A	A	A	A	A	A	A	U	A	A	A	A	A	A	A	A	A	A	A	A	A	A	A	A	A	A	A	A	A	A
be_A_C_chr8_16736470	8	16736470	-	T/G	H	H	A	H	H	H	H	H	H	H	H	H	H	H	A	H	H	H	H	A	H	H	A	H	H	H	H	H	H	H	H	A	H	H	H	H	H	A	H	H	H	H	H	H	H
be_A_C_chr8_19148856	8	19148856	-	T/G	A	H	A	A	A	A	A	A	A	A	A	A	A	A	A	A	A	A	A	A	A	H	A	H	A	H	A	A	A	H	A	A	A	A	A	A	A	A	H	A	H	A	A	A	H
be_A_C_chrUn_27262826	UN	27262826	-	T/G	A	H	A	A	A	A	A	A	A	A	A	A	A	A	A	A	A	A	A	A	A	A	A	A	A	A	A	A	A	A	A	A	A	A	A	A	A	A	A	A	H	A	A	A	A
be_A_C_chrUn_29000782	UN	29000782	+	A/C	A	A	H	H	A	A	A	A	A	U	H	A	H	A	A	A	A	A	A	A	A	A	A	A	A	H	H	H	A	A	A	A	A	A	H	H	A	A	A	A	U	A	A	A	A
be_A_C_chrUn_33595417	UN	33595417	+	A/C	H	H	H	H	B	U	H	H	B	B	B	B	A	B	A	A	B	B	B	B	B	H	B	H	B	B	A	B	H	H	B	A	H	B	B	A	H	B	A	A	B	B	B	A	B
be_A_G_chr1_19852892	1	19852892	-	T/C	A	A	A	A	A	A	A	A	A	H	A	H	H	A	A	A	A	H	A	A	A	H	A	A	A	A	H	A	A	A	A	A	A	A	H	H	A	A	A	H	A	A	A	A	A
be_A_G_chr1_3169143	1	3169143	+	A/G	A	H	A	A	A	A	A	A	A	A	A	A	H	A	A	A	A	A	A	A	A	H	A	A	A	A	A	A	A	H	A	A	A	A	A	A	A	A	U	A	A	A	A	A	A
be_A_G_chr1_7658107	1	7658107	+	A/G	H	A	H	H	A	H	A	A	A	H	A	A	A	A	A	H	A	A	A	A	A	A	A	H	A	H	B	H	A	H	A	A	H	A	A	H	A	A	H	B	A	A	A	H	A
be_A_G_chr1_9967233	1	9967233	+	A/G	A	A	A	A	A	A	A	A	A	A	A	A	A	A	A	H	A	A	A	A	A	A	A	A	A	A	H	A	A	A	A	A	A	A	A	H	A	A	H	H	A	A	A	A	A
be_A_G_chr10_1235859	10	1235859	+	A/G	A	A	H	H	A	A	A	A	A	H	A	A	A	A	A	A	A	A	A	A	A	A	A	H	A	H	A	H	A	H	A	A	A	A	A	A	A	A	H	A	H	A	A	H	A
be_A_G_chr10_1690711	10	1690711	-	T/C	B	A	A	H	A	U	A	A	A	A	A	H	H	A	A	B	A	A	A	A	A	A	A	A	A	A	H	A	H	A	A	B	H	A	H	H	A	A	H	H	A	A	A	H	A
be_A_G_chr10_245401	10	245401	+	A/G	A	A	A	A	A	A	A	A	A	A	A	H	A	A	A	B	A	H	A	A	A	A	A	A	A	A	A	A	A	A	A	A	A	A	A	A	A	A	A	H	A	A	A	A	A
be_A_G_chr10_3658240	10	3658240	+	A/G	A	H	A	A	A	A	A	A	A	H	A	A	A	A	A	A	A	A	A	A	A	H	A	A	A	H	A	A	A	A	A	A	A	A	A	A	A	A	A	A	H	A	A	A	A
be_A_G_chr10_5133356	10	5133356	-	T/C	A	A	A	A	A	A	A	A	A	A	A	A	H	A	A	A	A	A	A	A	U	A	A	A	A	A	A	A	A	A	A	A	A	A	A	A	A	A	U	A	A	A	A	A	A
be_A_G_chr10_9565429	10	9565429	+	A/G	A	A	A	H	A	H	A	A	A	A	A	B	H	A	A	A	A	A	A	A	A	H	A	A	H	A	A	A	A	A	A	A	A	A	A	A	A	A	A	A	A	H	A	H	A
be_A_G_chr10_random_178817	10	178817	-	T/C	A	H	A	A	B	A	A	H	H	A	A	A	H	A	A	A	A	A	A	A	H	A	A	U	H	H	A	A	A	H	A	A	H	H	A	A	H	A	H	A	H	H	H	A	H
be_A_G_chr11_14626769	11	14626769	+	A/G	H	H	H	H	U	H	H	H	H	H	H	H	H	H	A	H	H	A	H	H	H	H	H	H	H	H	H	H	A	H	H	A	H	H	H	H	H	H	H	H	H	H	H	H	H
be_A_G_chr11_1682280	11	1682280	+	A/G	A	A	A	A	A	A	A	A	A	A	A	A	A	A	A	A	A	A	A	A	A	H	A	A	A	A	H	A	A	A	A	A	A	A	A	H	A	A	A	H	A	A	A	H	A
be_A_G_chr11_4182637	11	4182637	+	A/G	A	A	A	A	A	B	A	A	A	A	A	A	H	A	A	H	A	A	A	A	A	A	A	A	A	A	A	A	A	A	A	A	A	A	A	A	A	A	A	A	A	A	A	A	A
be_A_G_chr11_4562402	11	4562402	+	A/G	A	H	A	H	A	H	A	A	A	H	A	A	A	A	A	A	A	H	A	A	A	H	A	U	A	A	H	A	A	A	A	A	H	A	H	H	A	A	A	H	H	A	A	H	A
be_A_G_chr11_6010047	11	6010047	-	T/C	A	A	A	A	A	A	A	A	A	H	A	A	A	A	A	A	A	A	A	A	A	A	A	H	A	H	A	H	A	A	A	A	A	A	H	A	A	A	A	A	A	A	A	A	A
be_A_G_chr11_9351843	11	9351843	-	T/C	A	H	A	H	A	A	A	A	A	A	A	A	A	A	A	A	A	A	A	A	A	A	A	A	A	A	A	A	A	A	A	A	H	A	A	A	A	A	A	A	H	A	A	A	A
be_A_G_chr11_random_17563	11	17563	+	A/G	A	A	A	A	A	A	A	A	A	A	A	A	A	A	A	B	A	A	A	A	A	A	A	A	A	A	H	A	A	H	A	A	A	A	A	A	A	A	H	H	A	A	A	A	A
be_A_G_chr12_1125468	12	1125468	+	A/G	A	H	A	H	A	H	A	A	A	A	A	A	H	A	A	H	A	A	A	A	A	A	A	A	A	H	H	H	A	A	A	A	H	A	A	H	A	A	A	H	H	A	A	A	H
be_A_G_chr12_18988422	12	18988422	+	A/G	A	H	H	A	A	A	A	H	H	A	A	A	A	H	A	A	H	H	A	A	A	H	A	H	H	H	A	B	H	A	A	A	A	A	A	A	A	A	A	H	H	A	A	A	H
be_A_G_chr12_263134	12	263134	+	A/G	H	H	H	H	B	A	H	A	B	B	H	H	A	H	A	A	H	A	B	A	H	B	A	B	A	H	A	B	A	H	B	A	H	B	B	H	A	A	H	H	H	A	B	A	A
be_A_G_chr12_5474137	12	5474137	+	A/G	A	A	A	A	A	A	A	A	A	A	A	A	A	A	A	A	A	A	A	A	A	A	A	A	A	A	A	A	A	A	A	A	A	A	A	A	A	A	A	H	A	A	A	A	A
be_A_G_chr12_6006082	12	6006082	-	T/C	A	A	A	A	A	A	A	A	A	A	A	A	A	A	A	H	A	A	A	A	A	A	A	A	A	A	A	A	A	A	A	A	A	A	A	A	A	A	A	A	A	A	A	A	A
be_A_G_chr13_2184894	13	2184894	+	A/G	A	H	A	A	A	A	A	A	A	H	A	A	A	A	A	A	A	A	A	A	A	A	A	H	A	H	A	A	A	A	A	A	A	A	A	A	A	A	A	A	A	A	A	A	A
be_A_G_chr13_2693155	13	2693155	-	T/C	H	A	H	H	A	A	A	A	A	H	A	A	A	A	A	A	A	A	A	A	A	A	A	A	A	A	A	A	A	A	A	A	H	A	A	A	A	A	A	A	H	A	A	H	A
be_A_G_chr14_10536122	14	10536122	+	A/G	A	H	A	H	A	H	A	A	A	A	A	A	A	H	A	B	A	A	A	A	A	A	A	A	A	H	H	H	A	A	A	A	H	A	B	H	A	A	A	H	H	A	A	A	A
be_A_G_chr14_11482145	14	11482145	+	A/G	A	H	A	A	H	A	A	A	A	A	H	A	A	U	A	A	A	A	A	H	A	A	A	A	A	H	A	A	A	A	A	A	A	A	A	A	A	H	A	H	H	A	A	A	A
be_A_G_chr14_1208621	14	1208621	+	A/G	U	H	A	U	B	U	H	H	B	H	U	H	H	B	A	A	B	H	B	H	B	H	H	H	H	H	U	H	H	U	H	A	B	H	H	H	A	H	H	H	U	H	B	H	B
be_A_G_chr14_14856758	14	14856758	-	T/C	H	A	A	A	A	A	A	A	A	H	A	A	A	A	A	H	A	A	A	A	A	A	A	H	A	A	A	H	A	H	A	A	A	A	H	A	A	A	H	H	A	A	A	H	A
be_A_G_chr14_16301280	14	16301280	-	T/C	A	H	A	A	H	H	H	A	A	A	A	A	H	A	A	A	A	A	A	A	A	H	A	A	A	H	A	A	H	A	A	A	A	A	A	A	U	A	A	H	H	A	A	A	A
be_A_G_chr14_16819891	14	16819891	+	A/G	H	H	A	A	A	A	A	A	A	A	A	A	A	A	A	A	A	A	A	A	A	A	A	A	A	H	A	H	A	H	A	A	A	A	A	A	A	A	H	A	H	A	A	H	A
be_A_G_chr14_19385840	14	19385840	+	A/G	H	H	H	H	B	A	A	B	H	H	B	H	A	B	A	A	H	A	B	B	B	H	A	H	B	H	A	H	H	H	B	A	H	B	H	A	B	U	A	A	H	B	B	A	B
be_A_G_chr14_20322871	14	20322871	-	T/C	H	H	A	H	A	H	H	A	A	H	A	A	H	A	A	H	A	H	A	A	A	A	A	U	A	H	H	A	A	H	A	A	H	A	A	H	A	A	H	H	H	A	A	H	A
be_A_G_chr14_20745468	14	20745468	+	A/G	H	A	A	H	A	B	A	U	A	H	A	A	A	A	A	B	A	B	A	A	A	H	U	U	A	A	H	H	A	H	A	A	H	U	A	B	A	A	H	H	A	A	A	H	A
be_A_G_chr14_24283576	14	24283576	-	T/C	H	A	A	H	A	H	A	A	A	H	A	A	H	A	A	H	A	A	A	A	A	H	A	H	A	A	H	H	A	H	A	A	H	A	A	H	A	A	H	H	A	A	A	H	A
be_A_G_chr14_30017148	14	30017148	+	A/G	H	H	A	H	A	A	A	A	A	A	A	A	A	A	A	A	A	A	A	A	A	H	A	H	A	H	A	A	A	H	A	A	A	A	A	A	A	A	H	A	H	A	A	H	H
be_A_G_chr14_6604905	14	6604905	+	A/G	H	A	A	A	A	H	A	A	A	A	A	A	H	A	A	A	A	H	A	A	H	A	A	A	A	A	A	A	A	A	A	A	A	A	A	A	A	A	A	A	A	A	A	H	A
be_A_G_chr15_12546751	15	12546751	+	A/G	A	A	A	H	A	H	H	A	A	A	A	A	A	A	A	H	A	A	A	A	A	A	A	A	A	H	H	A	A	A	A	A	H	A	A	H	A	A	A	H	A	A	A	H	A
be_A_G_chr15_14984302	15	14984302	-	T/C	A	A	A	A	A	A	A	A	A	A	A	A	H	A	A	H	A	A	A	A	A	H	A	A	A	A	A	H	A	H	A	A	A	A	A	A	A	A	H	H	A	A	A	H	A
be_A_G_chr15_9590503	15	9590503	+	A/G	A	A	A	A	A	A	A	A	A	A	A	A	H	A	A	A	A	A	A	A	A	A	A	A	A	H	H	A	A	A	A	A	A	A	A	H	A	A	A	H	A	A	A	H	A
be_A_G_chr16_13058279	16	13058279	+	A/G	A	H	A	A	A	A	A	A	A	A	A	A	A	A	A	A	A	H	A	A	A	A	A	U	A	H	A	A	A	A	A	A	A	A	A	A	A	A	A	A	H	A	A	A	B
be_A_G_chr16_14931970	16	14931970	+	A/G	A	H	A	H	A	B	H	A	A	A	A	A	H	A	A	B	A	A	A	A	A	A	A	H	A	H	B	H	A	A	A	A	H	A	A	B	A	U	H	B	H	A	A	A	B
be_A_G_chr16_17423694	16	17423694	+	A/G	A	H	A	A	A	U	H	A	H	A	H	A	A	A	H	A	A	H	A	H	A	A	A	H	H	H	H	H	U	H	A	A	A	A	A	A	A	A	A	H	H	H	A	H	H
be_A_G_chr16_19334123	16	19334123	+	A/G	A	A	A	A	A	A	A	H	A	A	A	A	A	A	A	A	A	A	A	A	A	A	A	A	A	A	A	A	A	A	A	H	H	A	H	A	A	A	H	A	H	A	A	A	A
be_A_G_chr16_20797932	16	20797932	+	A/G	A	A	A	H	A	B	H	A	A	A	A	A	H	A	A	A	A	H	A	A	A	H	A	H	A	A	H	A	A	A	A	A	B	A	A	B	A	A	A	H	H	A	A	H	A
be_A_G_chr16_231444	16	231444	-	T/C	A	H	A	H	A	A	A	A	A	A	A	A	A	A	A	A	A	A	A	A	A	A	A	U	A	H	A	A	A	A	A	A	A	A	A	A	A	A	A	A	H	A	A	A	H
be_A_G_chr16_8073394	16	8073394	-	T/C	A	B	A	B	B	B	H	B	U	B	B	B	H	U	A	H	B	B	A	U	B	A	A	H	U	B	H	B	A	B	U	A	B	H	U	H	H	U	U	H	B	B	U	A	H
be_A_G_chr17_2197009	17	2197009	-	T/C	A	A	A	A	A	A	A	A	A	A	A	A	A	A	A	A	A	H	A	A	A	A	A	A	A	A	A	A	A	A	A	A	A	A	A	A	A	A	A	A	A	A	A	A	A
be_A_G_chr17_251379	17	251379	+	A/G	A	H	A	A	A	A	A	A	A	H	A	A	A	A	A	A	A	A	A	A	A	A	A	H	A	A	A	A	A	A	A	A	A	A	A	A	A	A	A	H	A	A	A	A	A
be_A_G_chr17_734445	17	734445	+	A/G	A	A	A	H	A	H	A	A	A	B	A	A	A	A	A	A	A	H	A	A	A	A	A	H	A	H	A	H	A	A	A	A	H	A	A	A	A	A	A	H	H	A	A	A	H
be_A_G_chr17_8198918	17	8198918	+	A/G	A	A	A	H	A	A	A	A	A	A	A	A	H	A	A	A	A	A	A	A	A	A	A	A	A	H	H	H	A	A	A	A	A	A	A	H	A	A	A	A	H	A	A	A	A
be_A_G_chr18_11423130	18	11423130	+	A/G	A	A	A	A	A	H	A	A	U	A	A	A	A	A	A	H	A	A	A	A	A	A	A	A	A	A	H	A	A	A	A	A	A	A	A	H	A	A	A	H	H	A	A	A	A
be_A_G_chr18_11981068	18	11981068	+	A/G	A	H	A	A	H	A	A	A	A	H	A	A	A	A	A	A	A	A	A	A	A	H	A	H	A	H	H	A	H	H	A	A	A	A	A	H	H	A	A	H	H	A	A	H	H
be_A_G_chr18_14439427	18	14439427	+	A/G	A	A	A	A	U	U	U	A	U	A	A	A	A	A	A	A	A	H	A	A	A	A	A	A	A	A	A	A	A	A	A	A	A	A	A	A	A	A	A	A	A	U	A	A	A
be_A_G_chr18_2680754	18	2680754	-	T/C	H	B	A	H	H	A	A	H	B	H	H	H	H	B	A	A	B	H	B	H	B	B	B	U	B	B	H	H	A	B	B	A	H	B	H	H	H	B	H	A	B	H	B	H	B
be_A_G_chr18_random_3362764	18	3362764	-	T/C	A	A	A	A	A	A	A	A	U	U	A	A	A	A	A	A	A	H	A	H	H	A	U	U	A	A	A	A	A	A	A	A	A	A	A	A	A	A	A	A	A	A	A	A	A
be_A_G_chr19_2698548	19	2698548	+	A/G	A	A	A	A	A	B	H	A	A	A	A	A	A	A	A	B	A	A	A	A	A	A	A	U	A	H	B	H	A	A	A	A	A	A	A	B	A	A	A	B	A	A	A	A	H
be_A_G_chr19_6114586	19	6114586	+	A/G	A	A	A	A	H	A	H	H	A	A	A	A	H	A	B	A	A	A	A	A	A	A	A	A	A	A	H	A	H	A	A	A	A	A	A	H	A	A	A	H	A	A	A	A	A
be_A_G_chr2_10119189	2	10119189	-	T/C	H	H	A	A	A	A	A	A	A	A	A	A	U	A	A	A	A	A	A	A	A	A	A	U	A	H	A	H	A	A	A	A	A	A	A	A	A	A	A	A	A	A	A	H	H
be_A_G_chr2_16050721	2	16050721	+	A/G	B	H	H	H	H	H	A	H	U	H	A	B	A	B	H	H	B	H	B	B	B	H	B	H	B	H	H	H	A	B	H	A	H	B	H	A	A	B	H	H	B	A	B	H	H
be_A_G_chr2_2208703	2	2208703	-	T/C	A	A	A	B	H	U	A	A	A	A	A	H	U	A	A	A	A	H	A	A	A	A	A	A	A	A	H	H	H	H	A	A	H	A	A	H	H	A	H	H	H	A	A	A	A
be_A_G_chr2_8632188	2	8632188	-	T/C	H	H	A	A	A	A	A	A	A	H	A	A	H	A	A	A	A	A	A	A	A	A	A	H	A	H	A	H	A	H	A	A	A	A	A	A	A	A	H	A	A	A	A	H	H
be_A_G_chr3_4091322	3	4091322	-	T/C	A	H	A	A	A	A	A	A	A	A	A	A	A	A	A	A	A	H	A	A	A	A	A	A	A	A	H	A	A	H	A	A	A	A	A	H	A	A	A	H	A	A	A	H	A
be_A_G_chr4_21473261	4	21473261	-	T/C	H	H	B	H	H	H	H	B	B	H	B	B	H	B	H	A	B	B	B	H	H	H	B	B	A	H	H	H	H	B	B	A	H	H	H	H	H	B	B	H	H	B	B	B	A
be_A_G_chr4_22944461	4	22944461	+	A/G	H	H	A	H	H	H	H	H	H	H	H	H	H	H	H	H	H	H	H	H	H	H	H	H	H	H	H	H	H	H	A	A	H	H	H	H	A	H	H	H	H	H	H	H	H
be_A_G_chr4_2659029	4	2659029	-	T/C	H	A	A	H	A	A	A	A	A	A	A	A	A	A	A	H	A	A	A	A	A	H	A	A	A	H	H	A	A	H	A	A	H	A	A	H	A	A	H	H	A	H	A	H	H
be_A_G_chr4_3122198	4	3122198	-	T/C	A	A	A	A	A	A	A	A	A	A	A	A	A	A	A	A	A	H	A	B	A	A	H	A	A	H	A	A	A	A	A	A	A	A	A	A	A	A	A	A	A	H	A	A	H
be_A_G_chr4_4120623	4	4120623	-	T/C	H	H	A	A	A	A	H	A	H	A	A	A	H	H	A	H	A	A	A	A	A	A	A	A	A	H	H	A	A	A	A	A	A	A	A	H	A	A	A	H	A	A	H	H	H
be_A_G_chr4_6006432	4	6006432	-	T/C	A	A	A	H	A	B	H	A	A	A	A	A	A	A	U	H	A	A	A	A	A	A	A	A	A	H	H	H	A	A	A	A	U	A	A	A	A	A	U	A	A	A	A	A	B
be_A_G_chr5_1163325	5	1163325	-	T/C	A	A	A	H	A	A	A	A	A	H	A	H	A	A	A	B	A	A	A	A	A	A	A	A	A	A	H	A	A	A	A	A	H	A	A	H	A	A	A	H	A	A	A	A	A
be_A_G_chr5_15796523	5	15796523	+	A/G	A	A	A	A	A	A	A	A	A	A	A	A	H	A	A	A	A	A	A	A	A	A	A	H	A	A	A	A	A	H	A	A	A	A	A	A	A	A	A	A	A	A	A	A	A
be_A_G_chr5_16679887	5	16679887	+	A/G	H	H	H	H	H	H	H	H	H	H	B	H	H	A	A	H	H	H	B	A	H	H	H	H	A	H	A	H	A	H	H	A	A	H	H	H	A	H	A	A	H	H	H	A	H
be_A_G_chr5_22099693	5	22099693	+	A/G	H	H	H	H	H	A	A	H	B	H	B	H	A	B	A	B	B	H	B	B	B	B	H	H	B	H	H	H	A	B	B	A	H	B	H	H	A	B	A	H	H	H	B	A	B
be_A_G_chr5_752271	5	752271	+	A/G	A	A	H	H	A	H	A	A	A	A	A	A	A	A	A	A	A	A	A	A	A	A	A	A	A	A	A	A	A	A	A	A	B	A	A	A	A	A	A	A	H	A	A	A	A
be_A_G_chr6_15366239	6	15366239	+	A/G	B	B	H	B	B	H	A	A	B	B	B	H	A	B	A	H	B	B	B	H	B	H	B	H	U	H	H	H	A	B	B	A	B	B	B	H	A	U	H	A	B	U	B	H	B
be_A_G_chr6_16844100	6	16844100	+	A/G	A	H	A	A	A	A	A	A	A	A	A	A	A	A	A	A	A	A	A	A	A	A	A	A	A	A	H	H	A	A	A	A	A	A	A	H	A	A	A	H	H	A	A	A	A
be_A_G_chr6_19280688	6	19280688	+	A/G	A	A	A	A	A	H	A	A	A	A	A	A	H	A	A	A	A	A	A	A	A	H	A	A	A	A	H	A	A	H	A	A	A	A	A	H	A	A	H	H	A	A	A	A	A
be_A_G_chr6_20745346	6	20745346	-	T/C	A	A	A	A	A	A	A	A	A	A	A	A	A	A	A	A	A	B	A	A	A	A	A	A	A	A	A	A	A	H	A	A	A	A	H	A	A	A	H	A	A	A	A	A	A
be_A_G_chr6_7512768	6	7512768	+	A/G	A	A	A	H	A	H	A	A	A	A	A	A	A	A	A	A	A	A	A	A	A	H	A	A	A	A	H	H	A	A	A	A	H	A	A	H	A	A	A	H	A	A	A	A	A
be_A_G_chr6_9052773	6	9052773	-	T/C	A	A	A	H	A	B	A	A	A	A	A	A	H	A	A	B	A	B	A	A	A	A	A	A	A	A	A	A	A	A	A	A	H	A	H	A	A	A	A	A	A	A	A	A	A
be_A_G_chr7_11025003	7	11025003	+	A/G	B	A	H	A	H	B	A	U	H	A	A	H	H	H	A	A	A	A	A	A	A	H	A	U	A	H	B	H	A	A	H	A	A	H	A	H	A	A	A	H	A	H	H	U	H
be_A_G_chr7_12405185	7	12405185	+	A/G	H	A	A	H	A	H	A	A	A	A	A	A	H	A	A	A	A	A	H	A	A	A	A	A	A	A	H	H	A	A	B	A	H	A	A	A	A	A	H	A	A	A	A	H	A
be_A_G_chr7_14415811	7	14415811	+	A/G	A	H	H	H	B	H	A	H	B	A	A	H	H	A	A	A	H	B	H	A	H	A	A	U	A	H	A	A	A	H	H	A	H	H	H	A	A	A	A	A	B	A	B	A	B
be_A_G_chr7_17332964	7	17332964	+	A/G	A	H	A	A	A	A	A	A	A	H	A	A	A	A	A	A	A	A	A	A	A	A	A	U	A	H	A	A	A	A	A	A	A	A	A	A	A	A	A	A	A	A	A	A	A
be_A_G_chr7_18803343	7	18803343	+	A/G	A	A	A	A	A	A	H	A	A	A	B	A	A	A	A	H	B	A	A	B	A	A	B	A	A	A	B	H	A	A	A	A	A	A	A	B	A	B	A	H	A	H	A	A	A
be_A_G_chr7_19308765	7	19308765	+	A/G	A	A	A	H	A	U	A	A	A	A	A	A	H	A	A	A	A	A	A	A	A	A	A	A	A	A	B	A	A	A	A	A	A	A	A	B	A	A	A	H	A	A	A	A	A
be_A_G_chr7_20272630	7	20272630	+	A/G	A	A	A	A	A	A	A	A	A	A	A	A	A	A	A	A	A	H	A	A	A	A	A	A	A	A	A	H	A	A	A	A	A	A	A	A	A	A	A	A	A	A	A	H	A
be_A_G_chr7_4619059	7	4619059	-	T/C	H	A	A	H	A	U	A	A	A	A	A	A	A	A	A	H	A	A	A	A	A	A	A	A	A	A	B	H	A	A	A	A	B	A	A	B	A	A	A	H	H	A	A	H	H
be_A_G_chr7_5152989	7	5152989	-	T/C	A	A	A	A	A	A	A	A	A	A	A	A	H	A	A	A	A	A	A	A	A	A	A	A	A	A	H	A	A	A	A	A	H	A	A	H	A	A	A	H	H	A	A	A	H
be_A_G_chr7_7104223	7	7104223	+	A/G	A	H	U	H	H	A	A	A	H	H	A	H	U	H	A	H	H	A	H	A	U	H	U	H	A	H	H	H	A	H	H	A	A	H	A	U	A	U	A	H	H	A	H	A	A
be_A_G_chr8_11901643	8	11901643	-	T/C	A	A	A	A	A	A	A	A	A	H	A	A	A	A	A	A	A	A	A	A	A	A	A	A	A	A	A	A	A	A	A	A	H	A	A	A	A	A	A	A	H	A	A	A	A
be_A_G_chr8_12432767	8	12432767	-	T/C	A	A	A	H	A	A	A	A	A	A	A	A	A	A	A	H	U	U	A	A	A	A	A	A	A	A	H	A	A	A	U	A	B	A	A	H	A	A	A	H	U	A	A	A	A
be_A_G_chr8_13902843	8	13902843	-	T/C	H	H	A	H	H	A	A	U	B	H	H	H	A	H	A	A	H	A	H	A	B	H	H	H	H	H	H	A	A	H	B	A	H	A	A	H	H	A	A	H	B	A	B	A	B
be_A_G_chr9_10019477	9	10019477	+	A/G	H	A	H	A	H	H	A	A	H	A	A	H	A	A	A	H	A	H	H	H	A	H	A	H	A	H	H	H	H	H	A	A	H	H	H	A	A	A	H	H	H	H	H	H	H
be_A_G_chr9_11501538	9	11501538	-	T/C	A	H	A	A	A	A	A	A	A	H	A	A	A	A	A	A	A	A	A	A	A	A	A	A	H	A	A	A	A	A	A	A	A	A	A	A	A	A	A	A	A	A	A	A	A
be_A_G_chr9_1225244	9	1225244	-	T/C	A	H	A	H	H	U	A	A	A	H	A	A	H	A	A	B	A	B	A	A	A	A	A	U	A	A	B	A	H	H	A	A	H	A	H	B	A	A	H	B	A	A	A	A	A
be_A_G_chr9_1672911	9	1672911	-	T/C	A	H	A	A	A	A	A	A	A	H	A	A	A	A	A	A	A	A	A	A	A	A	A	A	A	A	A	A	A	H	A	A	A	A	A	A	A	A	H	A	A	A	A	A	A
be_A_G_chr9_18804750	9	18804750	+	A/G	A	H	A	H	A	A	A	A	A	H	B	H	A	H	A	H	A	H	H	H	A	B	A	U	A	A	B	H	A	H	H	A	H	A	A	H	A	A	H	H	A	H	A	A	A
be_A_G_chrUn_21176554	UN	21176554	+	A/G	H	H	A	A	A	A	A	A	H	H	H	A	A	A	A	H	A	B	A	A	A	H	A	H	H	A	A	A	A	A	A	A	A	A	B	A	A	A	A	A	A	A	A	H	A
be_A_G_chrUn_2773525	UN	2773525	-	T/C	H	H	H	H	H	H	A	H	H	H	U	H	A	H	A	H	A	H	H	A	H	H	A	H	H	H	H	H	H	H	H	A	H	A	H	H	A	A	H	H	H	H	H	H	U
be_A_G_chrUn_29880718	UN	29880718	+	A/G	A	B	H	H	B	U	H	H	B	B	B	H	A	B	A	A	B	B	B	A	B	H	A	H	B	B	A	H	H	H	B	A	H	B	B	A	A	A	A	A	H	B	B	H	B
be_A_G_chrUn_39578924	UN	39578924	+	A/G	U	H	H	B	B	B	H	H	B	H	B	H	H	B	H	B	B	B	B	B	B	B	B	U	B	H	H	B	H	B	B	A	B	B	B	H	A	B	H	H	B	B	B	H	B
be_A_G_chrUn_41399816	UN	41399816	-	T/C	A	H	A	H	A	H	A	H	A	H	H	H	A	U	B	H	H	H	A	H	H	A	A	U	A	A	A	A	A	H	A	H	H	A	A	A	U	H	H	A	U	A	H	A	A
be_A_G_chrUn_42776322	UN	42776322	+	A/G	H	A	H	A	B	H	B	H	A	H	A	H	A	H	B	H	A	A	H	H	A	A	H	H	A	A	A	A	H	A	B	A	A	A	H	A	A	H	B	A	A	H	H	H	A
be_A_G_chrUn_6934523	UN	6934523	-	T/C	A	A	A	A	A	A	A	H	A	A	A	A	A	A	A	A	A	H	A	A	A	A	A	A	H	A	A	A	A	A	A	A	A	A	A	A	A	A	H	A	A	H	A	A	A
be_A_G_chrUn_7367398	UN	7367398	-	T/C	A	A	A	A	A	A	A	A	A	A	A	A	A	A	A	A	A	A	A	A	A	A	A	A	A	A	A	H	A	A	A	A	H	A	A	A	A	A	A	A	H	A	A	A	A
be_C_A_chr10_5609983	10	5609983	+	A/C	B	B	B	B	B	B	B	B	B	B	B	B	H	B	B	B	B	B	B	B	B	H	B	B	B	B	B	B	B	B	B	B	B	B	B	B	B	B	B	B	B	B	B	B	B
be_C_A_chr11_19497685	11	19497685	+	A/C	B	H	B	H	A	B	B	B	B	B	B	B	B	B	B	B	B	B	B	H	B	A	A	B	A	B	B	B	B	B	B	B	H	B	B	B	B	A	B	B	H	U	B	B	U
be_C_A_chr11_2628987	11	2628987	+	A/C	H	B	B	B	B	B	B	H	H	H	B	H	B	H	B	H	B	B	B	A	A	B	A	H	A	A	H	A	B	H	H	B	B	A	H	H	B	A	B	H	H	H	H	B	H
be_C_A_chr12_17091765	12	17091765	-	T/G	H	B	B	B	H	H	B	B	B	A	H	B	H	B	B	B	B	H	B	B	B	H	B	B	B	B	A	B	H	B	H	B	B	H	A	A	B	B	B	H	B	B	B	B	B
be_C_A_chr12_8011946	12	8011946	-	T/G	B	H	U	H	B	H	H	B	H	U	B	B	B	H	U	U	B	B	H	B	H	B	B	U	H	U	H	H	H	H	B	B	H	H	B	H	H	B	H	H	B	H	H	B	U
be_C_A_chr13_5623192	13	5623192	+	A/C	B	B	H	H	B	B	B	B	B	H	B	B	B	B	B	B	B	B	B	B	B	B	B	B	B	B	H	B	B	B	B	B	H	B	B	H	B	B	B	H	H	B	B	B	B
be_C_A_chr13_9918287	13	9918287	-	T/G	B	B	B	B	B	B	B	B	B	B	B	B	B	B	B	B	B	B	B	B	B	H	B	B	B	B	H	B	B	B	B	B	B	B	H	B	B	B	B	H	B	B	B	B	B
be_C_A_chr14_18308981	14	18308981	+	A/C	B	H	B	H	B	H	B	B	B	B	B	B	H	B	B	A	B	B	B	B	B	H	B	B	B	H	B	B	B	B	B	B	H	B	B	H	B	B	B	A	H	B	B	B	B
be_C_A_chr14_25276804	14	25276804	-	T/G	H	B	B	H	H	B	H	H	H	H	H	H	H	H	B	B	H	H	H	B	H	H	B	H	H	H	B	H	B	H	H	B	H	H	H	B	B	B	H	B	H	B	H	H	B
be_C_A_chr17_5657720	17	5657720	+	A/C	B	B	B	H	B	B	B	B	B	H	B	B	B	B	B	A	B	B	B	B	B	H	B	U	B	H	B	H	B	B	B	B	B	B	B	B	B	B	H	H	H	B	B	B	B
be_C_A_chr18_1703363	18	1703363	+	A/C	B	H	B	B	B	B	B	B	B	B	B	B	B	B	B	B	B	B	B	B	B	B	B	U	B	H	B	H	B	B	B	B	B	B	B	B	B	B	B	H	H	B	B	B	H
be_C_A_chr18_5640439	18	5640439	+	A/C	B	B	B	B	B	A	B	B	B	H	B	B	H	B	B	H	B	B	B	B	B	B	B	B	B	B	B	B	B	B	B	B	H	B	B	B	B	B	B	B	B	B	B	B	H
be_C_A_chr18_random_4851955	18	4851955	+	A/C	H	B	H	H	H	H	B	H	H	B	H	H	B	H	H	H	U	H	H	H	H	H	H	H	H	H	H	H	B	H	H	B	H	H	H	H	U	H	H	H	H	H	H	B	U
be_C_A_chr19_16904760	19	16904760	+	A/C	B	B	B	B	B	B	H	B	B	B	B	B	B	A	B	B	B	B	B	A	B	B	H	B	B	B	B	B	B	B	H	B	H	H	B	B	B	H	B	H	H	B	B	B	B
be_C_A_chr19_17407523	19	17407523	+	A/C	B	H	B	B	B	H	H	B	B	B	B	B	B	B	B	B	B	B	B	B	B	B	B	B	B	H	H	H	B	B	B	B	U	B	B	B	H	B	B	H	H	B	B	B	H
be_C_A_chr19_718723	19	718723	+	A/C	H	H	H	H	B	H	H	U	H	H	H	H	H	H	H	H	H	H	H	H	H	H	H	H	H	H	H	H	H	H	H	H	H	H	H	H	H	H	H	H	H	H	H	H	H
be_C_A_chr2_17510812	2	17510812	-	T/G	H	H	B	H	B	H	H	H	B	H	H	H	H	B	B	H	B	H	B	B	B	H	B	H	B	H	H	H	H	H	B	B	H	H	H	A	B	B	H	H	U	H	B	H	H
be_C_A_chr2_5646654	2	5646654	-	T/G	B	B	B	B	B	B	B	B	B	B	B	B	B	B	B	B	B	B	B	B	B	B	B	B	B	B	B	A	B	B	B	B	B	B	B	B	B	B	U	B	B	B	B	B	B
be_C_A_chr3_16054319	3	16054319	+	A/C	H	B	B	H	B	B	B	B	B	B	B	B	B	B	B	H	B	H	B	B	U	B	B	B	B	B	B	B	B	B	U	B	B	U	B	B	B	B	B	B	B	U	B	H	B
be_C_A_chr3_5463929	3	5463929	+	A/C	B	B	H	B	B	B	A	H	B	H	B	B	H	B	H	B	B	B	B	B	B	B	B	B	B	A	H	B	H	A	B	B	H	B	B	H	H	B	H	H	H	B	B	H	A
be_C_A_chr3_6932339	3	6932339	-	T/G	B	B	B	B	B	B	B	B	B	H	B	B	H	B	H	B	B	B	B	B	B	B	B	U	B	H	H	B	B	B	B	B	H	B	H	U	B	B	H	U	H	B	B	B	H
be_C_A_chr4_14225066	4	14225066	+	A/C	H	H	H	H	H	U	B	H	A	B	A	H	B	B	H	H	B	B	H	A	A	A	A	H	A	H	H	H	B	H	A	B	H	H	H	B	H	H	B	H	H	A	H	H	H
be_C_A_chr4_random_23420	4	23420	+	A/C	H	B	B	B	B	B	B	B	B	H	B	H	B	B	B	B	B	B	B	B	B	B	B	B	B	B	H	B	B	H	B	B	B	B	B	H	B	B	H	H	B	B	B	H	B
be_C_A_chr5_5066374	5	5066374	+	A/C	B	H	H	H	H	H	H	B	B	H	B	H	H	B	B	H	B	H	B	B	B	H	B	B	B	H	H	H	H	H	B	H	H	B	H	H	H	B	H	H	H	B	B	H	H
be_C_A_chr5_5568555	5	5568555	-	T/G	B	B	B	B	B	B	B	B	B	H	B	B	B	B	B	B	B	A	B	B	B	H	B	B	B	B	B	B	B	B	B	B	B	B	H	B	B	B	B	B	B	B	B	H	B
be_C_A_chr5_7537679	5	7537679	+	A/C	B	H	B	B	B	B	B	B	B	H	B	B	B	B	B	B	B	B	B	B	B	B	B	B	B	H	H	B	B	B	B	B	B	B	B	H	B	B	B	H	B	B	B	H	H
be_C_A_chr7_3687416	7	3687416	-	T/G	H	A	H	A	A	A	H	H	A	A	A	A	H	A	B	A	A	A	A	A	A	H	H	H	A	A	H	A	B	H	A	B	H	H	A	H	H	H	B	A	H	H	A	B	H
be_C_A_chr8_14342195	8	14342195	-	T/G	H	H	H	B	B	H	B	B	B	B	B	B	B	B	B	B	B	B	B	B	B	B	B	B	B	B	H	B	B	H	B	B	B	B	B	H	B	B	H	H	B	H	B	H	B
be_C_A_chr8_14841264	8	14841264	+	A/C	B	B	B	B	B	B	B	B	B	H	B	B	B	B	B	B	B	B	B	B	B	B	B	B	B	B	B	B	B	H	B	B	B	B	B	B	B	B	H	B	B	B	B	B	B
be_C_A_chr9_10499885	9	10499885	+	A/C	B	B	H	H	B	H	H	B	B	B	B	B	B	B	B	B	B	B	B	B	B	B	B	B	B	H	B	B	B	B	B	B	A	B	B	H	B	B	B	B	H	B	B	B	H
be_C_A_chr9_11557665	9	11557665	+	A/C	H	H	B	H	H	H	H	H	H	H	H	H	H	H	B	H	H	H	H	H	H	H	H	H	H	H	H	H	H	H	H	B	H	H	H	H	H	H	H	H	H	H	H	H	H
be_C_A_chr9_255464	9	255464	+	A/C	H	H	U	H	H	B	B	U	H	U	H	H	B	B	B	B	H	B	H	B	U	H	B	H	H	H	B	H	B	H	H	B	H	H	U	B	B	H	B	B	H	U	H	B	H
be_C_A_chrUn_25647947	UN	25647947	+	A/C	B	H	B	B	B	U	B	B	B	B	B	B	B	B	B	B	B	B	B	B	B	B	B	B	B	B	A	H	B	B	B	B	B	B	B	A	B	B	B	H	B	B	B	H	B
be_C_A_chrUn_26275763	UN	26275763	+	A/C	H	B	B	B	H	B	B	B	H	B	B	B	H	B	B	B	H	H	H	B	H	H	B	B	H	B	H	A	H	H	A	B	B	H	H	H	H	B	H	H	H	B	B	B	B
be_C_A_chrUn_30459172	UN	30459172	+	A/C	H	H	H	H	H	H	B	B	U	H	H	B	H	B	B	B	H	H	H	B	H	H	B	H	B	H	H	H	H	U	H	B	H	B	H	H	H	B	H	H	H	B	U	H	A
be_C_A_chrUn_31018313	UN	31018313	+	A/C	B	B	H	A	B	U	B	B	B	H	B	B	H	B	B	A	B	H	B	H	B	H	B	B	B	H	B	B	B	B	B	B	H	B	B	B	B	B	B	H	H	B	B	H	B
be_C_T_chr1_11964646	1	11964646	-	T/C	H	H	B	H	B	H	U	H	B	H	B	B	H	H	H	H	H	H	H	H	H	H	H	H	H	H	H	H	H	B	H	H	H	H	H	H	H	H	H	H	H	H	B	H	B
be_C_T_chr1_1236598	1	1236598	+	A/G	B	B	H	H	B	B	H	B	B	B	B	B	B	B	B	B	B	B	B	B	B	H	B	H	B	B	H	H	B	B	B	B	H	B	B	B	B	B	B	B	B	B	B	B	B
be_C_T_chr1_1705248	1	1705248	-	T/C	H	B	H	B	B	B	B	B	B	H	B	B	H	B	B	B	B	H	B	B	B	H	B	U	B	H	B	B	B	B	B	B	B	B	H	B	B	B	B	B	H	B	B	H	B
be_C_T_chr1_18438884	1	18438884	+	A/G	H	H	H	H	H	H	H	H	H	H	H	H	B	H	B	H	H	H	H	H	H	H	H	H	B	H	H	H	H	H	H	B	H	H	H	H	B	H	H	H	H	H	H	H	H
be_C_T_chr1_19335852	1	19335852	-	T/C	B	B	B	B	U	B	B	B	B	B	B	B	B	B	B	B	B	B	B	B	B	H	B	B	B	H	B	B	B	U	B	U	B	B	B	B	B	B	B	B	B	B	B	B	H
be_C_T_chr1_6124236	1	6124236	+	A/G	A	H	H	H	A	H	H	H	A	A	A	A	B	A	B	B	A	H	A	A	A	A	A	H	A	H	B	A	H	A	U	H	H	A	A	H	H	A	H	B	H	A	A	H	A
be_C_T_chr1_6617103	1	6617103	-	T/C	H	H	H	H	A	A	B	H	A	H	A	U	H	A	B	H	A	B	A	A	A	A	A	A	A	A	B	H	H	H	A	B	H	A	U	B	A	A	B	B	A	A	A	H	A
be_C_T_chr10_10533009	10	10533009	-	T/C	B	B	B	B	B	H	B	B	B	B	B	B	H	B	B	H	B	B	B	B	B	B	B	B	B	B	H	H	B	B	B	B	H	B	B	B	H	B	B	H	B	B	B	B	B
be_C_T_chr10_14460851	10	14460851	+	A/G	B	B	B	B	B	U	B	B	B	B	B	H	H	B	B	A	B	B	B	B	B	A	B	B	B	B	A	B	B	B	B	B	H	H	B	H	B	B	B	A	B	H	B	H	B
be_C_T_chr10_17879652	10	17879652	-	T/C	B	H	B	B	B	B	B	B	B	A	B	B	B	B	B	B	B	B	U	B	U	B	B	B	B	H	B	B	B	B	B	B	B	B	B	B	B	B	B	B	H	B	B	B	H
be_C_T_chr10_3170273	10	3170273	-	T/C	B	H	B	B	H	B	B	B	B	H	B	B	B	B	B	B	H	B	H	B	H	H	B	H	B	H	B	H	B	B	B	B	B	B	B	B	B	B	B	H	H	B	B	H	B
be_C_T_chr11_18468240	11	18468240	+	A/G	B	H	B	H	B	B	B	B	B	B	B	B	H	B	B	B	B	B	B	B	B	B	B	B	B	B	B	H	B	B	B	B	H	B	B	B	B	B	B	B	H	B	B	B	B
be_C_T_chr11_18992381	11	18992381	+	A/G	B	B	B	B	H	B	B	B	B	H	H	H	H	B	B	H	B	B	B	H	B	B	H	U	H	H	B	B	H	B	B	B	B	H	B	B	B	H	B	B	B	H	B	B	B
be_C_T_chr11_3591688	11	3591688	-	T/C	B	B	B	H	B	U	B	B	B	H	B	B	H	B	B	A	B	B	B	B	B	H	B	U	B	H	H	H	B	B	B	B	H	B	B	H	B	B	B	H	B	B	B	B	B
be_C_T_chr11_7434808	11	7434808	+	A/G	B	B	B	B	B	H	B	B	B	A	B	B	H	B	B	B	B	B	B	B	B	H	B	H	B	H	A	B	B	H	B	B	B	B	B	H	B	B	H	A	B	H	B	H	B
be_C_T_chr11_random_95437	11	95437	+	A/G	A	A	B	H	B	B	B	B	B	B	U	B	B	U	U	B	U	B	U	B	A	B	B	B	A	B	B	H	B	A	U	B	H	A	H	B	U	H	H	B	A	U	U	A	U
be_C_T_chr12_15230599	12	15230599	+	A/G	B	B	B	B	B	B	B	B	B	B	B	B	H	B	B	B	H	H	B	B	B	B	B	U	H	B	H	H	B	H	H	B	B	B	H	H	B	H	H	H	B	B	B	B	B
be_C_T_chr12_21422874	12	21422874	-	T/C	B	H	H	B	H	B	B	U	B	B	H	B	B	U	B	B	H	H	H	B	H	A	A	H	H	H	H	H	U	U	B	B	B	A	U	H	B	H	U	H	H	B	B	B	H
be_C_T_chr12_2170965	12	2170965	-	T/C	H	H	B	H	B	U	B	B	H	B	B	B	B	B	B	H	B	H	B	B	B	H	B	U	H	H	H	B	B	H	H	B	H	H	B	H	B	B	B	H	H	B	H	B	H
be_C_T_chr12_22408895	12	22408895	-	T/C	B	B	B	H	B	U	H	B	B	H	B	H	H	B	B	U	B	U	B	B	B	H	B	B	B	B	H	H	B	H	B	B	H	B	H	H	B	B	H	H	B	H	B	B	B
be_C_T_chr12_5066593	12	5066593	+	A/G	H	H	H	H	H	U	H	H	H	H	H	H	H	H	B	H	H	H	U	H	H	U	B	H	H	H	H	H	H	H	U	B	H	H	H	H	H	U	H	H	H	H	H	H	H
be_C_T_chr12_6468738	12	6468738	-	T/C	H	B	B	B	H	A	H	H	B	H	B	B	H	H	B	A	H	B	H	B	H	H	B	H	B	B	H	H	B	H	B	B	B	B	B	H	H	H	H	H	B	B	B	H	B
be_C_T_chr13_13872173	13	13872173	-	T/C	H	H	H	H	H	H	H	H	H	H	H	H	B	H	B	H	H	H	H	H	H	H	H	H	H	H	H	H	H	H	H	B	H	H	H	H	H	B	H	H	H	H	H	H	H
be_C_T_chr13_20343077	13	20343077	-	T/C	A	H	A	A	B	U	B	B	A	B	H	A	H	B	B	B	H	H	H	H	B	H	B	U	H	H	A	B	B	H	B	B	A	A	B	A	B	H	H	H	A	H	H	H	H
be_C_T_chr13_23109121	13	23109121	-	T/C	B	B	B	B	B	U	H	B	B	U	U	B	B	U	B	B	U	H	B	B	U	B	B	B	B	B	B	A	B	B	U	B	B	B	B	B	B	B	B	B	B	U	U	B	U
be_C_T_chr13_23652619	13	23652619	-	T/C	B	B	B	B	B	B	B	B	B	B	B	B	B	B	B	B	H	H	B	B	B	B	B	B	B	B	B	B	H	B	B	B	B	B	B	B	B	B	H	B	B	B	B	B	B
be_C_T_chr13_4171097	13	4171097	+	A/G	H	H	H	H	H	H	H	B	H	H	H	H	H	H	B	H	H	H	H	B	H	H	B	H	H	H	H	H	H	H	H	B	H	H	H	H	H	B	H	H	H	H	H	U	H
be_C_T_chr13_5106038	13	5106038	-	T/C	A	H	H	A	A	U	B	H	A	H	A	H	H	A	B	A	A	B	A	A	A	H	B	H	A	H	H	H	H	H	A	B	A	A	H	A	B	A	B	H	A	H	A	H	A
be_C_T_chr13_6638530	13	6638530	-	T/C	B	B	B	H	B	U	B	B	B	H	B	B	U	B	U	H	B	B	B	B	B	B	B	B	B	B	U	B	B	B	B	B	H	B	B	H	B	B	B	H	B	B	B	B	B
be_C_T_chr13_7054420	13	7054420	-	T/C	U	A	B	B	A	B	H	H	A	B	A	H	B	A	B	B	A	A	H	U	A	B	H	U	A	H	B	H	H	H	A	B	B	B	H	B	H	A	B	B	H	U	A	H	A
be_C_T_chr13_7536864	13	7536864	-	T/C	B	A	B	B	B	U	H	H	B	H	A	H	B	A	B	H	A	A	H	H	A	H	B	U	A	H	B	H	B	H	H	B	B	A	H	B	B	B	B	B	H	H	A	B	A
be_C_T_chr13_8997672	13	8997672	-	T/C	H	H	H	H	B	H	B	B	B	H	B	B	H	B	B	H	B	H	B	B	B	H	B	U	B	H	H	H	B	H	B	B	H	B	B	H	B	B	H	H	H	B	B	H	B
be_C_T_chr13_random_2095320	13	2095320	+	A/G	H	A	B	B	B	H	B	B	U	H	B	B	B	H	B	H	B	H	B	B	B	H	B	B	U	B	H	U	H	U	B	B	H	B	H	H	U	B	B	H	B	B	U	H	U
be_C_T_chr13_random_251663	13	251663	-	T/C	H	B	H	H	B	B	B	H	H	B	B	H	B	B	B	B	H	B	B	B	B	B	U	H	B	H	B	H	B	B	B	B	H	B	B	B	B	B	B	B	H	B	B	B	B
be_C_T_chr14_13852396	14	13852396	-	T/C	B	B	B	B	B	H	A	B	B	H	B	B	B	B	B	H	B	U	B	B	H	H	B	U	B	B	H	H	B	B	H	H	H	B	B	H	H	B	H	H	B	H	B	B	B
be_C_T_chr14_15866377	14	15866377	+	A/G	B	H	B	B	B	B	B	B	B	B	B	U	B	A	B	B	A	B	B	B	B	B	B	B	B	U	B	B	B	B	U	B	B	B	B	B	B	B	B	B	H	B	B	B	B
be_C_T_chr14_9034142	14	9034142	+	A/G	H	H	H	H	H	B	B	H	A	H	A	A	B	A	B	H	B	H	H	H	H	H	B	U	B	H	A	H	H	A	B	B	H	H	H	A	A	A	H	H	H	B	A	B	A
be_C_T_chr15_11974543	15	11974543	-	T/C	B	A	B	B	B	B	B	U	H	H	B	H	B	H	B	H	B	A	H	A	A	A	A	U	B	H	A	H	U	H	B	B	U	H	B	A	H	H	H	A	U	B	H	H	A
be_C_T_chr15_13024367	15	13024367	-	T/C	B	H	H	B	B	B	B	B	B	B	B	B	B	B	B	B	B	B	B	B	B	H	B	B	H	B	A	B	B	B	B	B	B	B	B	A	B	B	B	B	H	B	B	B	B
be_C_T_chr15_1710331	15	1710331	+	A/G	B	H	H	B	B	B	B	B	B	B	B	H	B	B	B	H	B	H	B	B	B	B	B	B	B	B	H	B	B	H	B	B	H	B	B	H	B	B	H	B	H	H	B	B	B
be_C_T_chr15_17444663	15	17444663	+	A/G	H	H	H	H	H	B	B	H	H	H	H	H	B	H	B	B	H	B	H	H	H	H	H	H	H	H	H	H	H	H	H	B	H	H	H	H	H	H	H	H	H	H	H	H	H
be_C_T_chr15_2191500	15	2191500	+	A/G	H	B	B	B	H	U	H	H	B	B	B	B	B	B	B	H	B	B	B	B	B	B	B	B	B	H	B	B	B	H	B	B	B	B	B	B	B	B	H	B	B	H	B	H	U
be_C_T_chr15_2712436	15	2712436	-	T/C	B	B	B	H	U	H	H	H	H	H	U	H	B	H	B	B	H	H	H	H	H	H	H	H	H	H	H	H	B	H	H	B	H	U	H	H	H	H	B	H	H	B	H	B	B
be_C_T_chr15_3216538	15	3216538	-	T/C	B	B	B	B	H	H	H	B	H	H	H	H	B	H	H	H	H	H	H	H	H	B	B	H	H	B	B	H	B	H	B	B	B	H	H	B	H	H	H	H	B	H	B	B	B
be_C_T_chr15_8087308	15	8087308	-	T/C	B	H	H	B	B	B	B	B	B	B	B	B	B	B	B	B	B	B	B	B	B	H	B	B	B	B	H	H	B	H	B	B	H	B	B	H	B	B	H	H	H	B	B	H	B
be_C_T_chr16_11547331	16	11547331	-	T/C	B	H	B	H	B	U	B	B	B	B	B	B	B	B	B	B	B	B	B	B	B	B	B	U	B	H	H	B	B	B	H	B	H	H	B	H	B	B	B	H	H	B	B	B	A
be_C_T_chr16_12474677	16	12474677	+	A/G	B	B	B	H	B	B	H	H	B	B	B	B	B	B	H	B	B	B	B	B	B	B	B	B	B	B	H	B	B	B	B	B	H	B	B	H	B	B	B	H	B	B	B	H	B
be_C_T_chr16_13979282	16	13979282	+	A/G	B	H	B	B	B	H	B	B	B	B	B	B	B	B	B	B	B	H	U	U	U	B	B	U	B	A	H	B	B	A	B	B	B	B	B	H	B	U	B	H	H	B	B	B	A
be_C_T_chr16_15431537	16	15431537	-	T/C	H	H	H	H	H	H	H	H	H	H	H	H	B	H	H	H	H	B	H	H	H	H	H	H	H	H	B	H	H	H	H	H	H	H	H	U	H	H	H	B	H	H	H	H	H
be_C_T_chr16_2211846	16	2211846	+	A/G	H	B	H	B	B	H	H	B	B	B	B	B	H	B	B	A	B	H	H	B	B	B	B	H	B	B	A	H	A	B	B	A	H	H	B	A	B	B	A	H	B	H	B	H	H
be_C_T_chr16_2715151	16	2715151	+	A/G	B	B	B	B	B	U	A	H	B	B	B	H	B	B	H	B	B	B	B	B	B	B	B	B	B	B	B	B	H	B	H	B	B	B	B	B	B	B	H	H	B	B	B	B	B
be_C_T_chr16_3192042	16	3192042	+	A/G	B	H	H	H	B	H	B	B	B	B	B	B	B	B	B	H	B	B	B	B	B	H	B	U	B	H	B	B	B	B	B	B	B	B	B	B	B	B	B	B	H	B	B	B	A
be_C_T_chr16_5141952	16	5141952	-	T/C	B	B	H	B	B	B	B	B	B	B	B	H	B	B	B	B	B	B	B	B	B	B	B	U	B	B	B	H	B	H	B	B	B	B	B	B	B	H	B	B	B	B	B	B	H
be_C_T_chr16_7088222	16	7088222	-	T/C	B	H	H	A	A	U	H	H	A	U	H	H	B	H	B	B	A	B	A	B	H	H	H	H	A	H	H	H	B	A	A	B	A	A	H	H	B	B	B	H	U	H	A	B	H
be_C_T_chr17_10484580	17	10484580	+	A/G	B	H	H	B	B	B	B	B	B	B	B	B	B	B	B	B	B	B	B	B	B	B	B	B	B	B	B	B	B	B	B	B	B	B	B	B	B	B	B	B	B	B	B	B	H
be_C_T_chr17_14885464	17	14885464	-	T/C	H	B	B	H	B	B	B	H	B	B	B	B	B	B	B	B	B	H	B	B	B	B	B	U	B	H	H	B	B	B	B	B	B	B	H	H	B	B	H	H	H	H	B	H	B
be_C_T_chr17_16803085	17	16803085	-	T/C	U	H	H	B	H	B	U	B	B	B	B	H	H	B	B	H	B	H	B	U	B	H	B	B	H	H	H	H	H	H	B	B	H	B	H	H	H	H	H	H	H	B	B	H	B
be_C_T_chr17_3174616	17	3174616	-	T/C	B	H	H	B	B	B	B	B	B	B	B	B	B	B	B	B	H	B	B	B	B	B	B	B	B	B	B	B	B	B	B	B	B	B	B	B	B	B	B	B	B	B	B	B	B
be_C_T_chr17_9027484	17	9027484	+	A/G	H	B	B	H	B	B	B	B	B	B	B	B	H	B	B	B	B	B	B	B	B	H	B	B	B	H	A	B	B	B	B	B	B	B	B	H	B	B	B	H	H	B	B	H	B
be_C_T_chr17_9531950	17	9531950	-	T/C	B	B	B	U	B	H	B	B	B	H	B	B	H	B	B	H	B	B	B	B	B	H	B	U	B	H	H	H	B	B	B	B	H	B	B	H	B	B	B	H	H	B	B	B	B
be_C_T_chr18_10967519	18	10967519	-	T/C	A	A	H	A	H	H	B	H	B	A	A	B	H	U	B	A	H	B	U	B	H	A	H	H	A	A	H	H	B	A	A	B	A	U	B	H	B	H	A	H	H	H	A	B	A
be_C_T_chr18_1249477	18	1249477	+	A/G	H	H	H	H	H	H	H	H	H	H	H	H	H	H	B	H	H	H	H	H	H	H	H	H	B	H	H	H	H	H	H	H	H	H	H	H	H	B	H	H	H	B	H	U	H
be_C_T_chr18_13425462	18	13425462	+	A/G	U	H	B	H	H	A	B	U	B	H	A	H	A	A	B	A	H	A	H	H	A	H	B	H	A	H	B	H	B	H	A	B	H	H	A	B	B	B	B	B	H	B	H	B	H
be_C_T_chr18_20284539	18	20284539	-	T/C	H	B	H	B	B	B	U	B	B	B	B	B	H	B	B	B	B	A	B	B	B	H	B	B	B	B	B	B	H	H	B	U	B	B	H	B	H	B	H	B	H	B	B	H	B
be_C_T_chr18_20769025	18	20769025	+	A/G	B	B	B	B	B	B	B	B	B	B	B	B	B	B	B	B	B	B	B	B	B	B	B	B	B	B	B	B	B	H	B	B	B	B	B	B	B	U	B	B	B	B	B	B	B
be_C_T_chr18_24255756	18	24255756	-	T/C	B	B	B	B	B	B	B	B	B	B	B	B	B	B	B	B	B	B	B	B	B	B	B	B	B	B	H	B	B	H	B	B	B	B	B	H	B	U	B	B	H	B	B	B	B
be_C_T_chr18_24679023	18	24679023	-	T/C	B	H	H	H	H	B	B	H	B	B	B	B	B	H	H	H	B	B	H	B	H	H	H	H	H	H	B	H	H	U	U	B	U	H	H	B	H	H	H	B	A	H	H	B	H
be_C_T_chr18_25646557	18	25646557	-	T/C	B	B	B	B	B	H	B	H	B	B	H	H	H	H	B	B	A	A	A	A	H	B	A	H	H	B	B	A	B	H	H	B	B	H	H	B	H	A	B	H	H	A	B	B	B
be_C_T_chr18_7124037	18	7124037	+	A/G	B	B	B	B	B	H	B	B	B	B	B	H	H	B	B	B	B	B	B	B	B	B	B	U	B	B	B	B	B	H	B	B	B	B	B	B	B	B	H	H	B	B	B	B	B
be_C_T_chr19_10526679	19	10526679	+	A/G	B	B	B	H	B	U	B	B	B	B	B	B	H	B	B	A	B	B	B	B	B	B	B	B	B	B	A	B	B	B	B	B	A	B	B	H	B	B	B	B	H	B	B	B	B
be_C_T_chr19_20823457	19	20823457	+	A/G	B	H	B	B	B	B	B	B	B	B	H	H	H	B	B	B	B	B	H	H	B	B	B	U	B	H	B	B	B	B	B	B	B	B	H	A	B	B	B	H	B	B	B	B	H
be_C_T_chr19_21338053	19	21338053	+	A/G	H	H	U	A	H	H	H	U	H	H	H	H	H	A	B	A	A	A	A	H	H	A	A	H	H	H	H	H	U	H	H	B	H	A	B	H	B	H	B	B	H	U	H	U	H
be_C_T_chr19_4669620	19	4669620	+	A/G	B	B	B	B	B	B	B	B	B	B	B	B	H	B	B	B	B	B	B	B	B	B	B	B	B	H	B	B	B	B	B	B	B	B	B	B	B	B	B	B	B	B	B	B	H
be_C_T_chr2_13046859	2	13046859	-	T/C	B	B	B	B	B	B	B	B	B	B	B	H	B	B	B	B	B	B	B	B	B	B	B	B	B	B	B	B	B	B	B	B	B	B	H	B	B	B	B	B	B	H	B	B	B
be_C_T_chr2_2720067	2	2720067	+	A/G	H	H	H	H	B	B	H	H	A	H	A	A	B	A	B	B	A	A	A	H	H	H	B	H	A	H	B	H	B	H	A	B	H	A	A	B	B	B	B	B	A	A	A	B	H
be_C_T_chr2_3738448	2	3738448	-	T/C	H	B	H	B	H	U	H	B	B	B	B	B	H	B	H	B	B	H	B	B	B	H	B	B	H	B	H	H	H	B	B	B	B	B	H	H	H	B	H	A	B	B	B	H	B
be_C_T_chr2_6189454	2	6189454	-	T/C	H	H	H	H	H	H	H	H	H	H	B	H	H	H	B	H	H	H	H	H	H	H	H	H	H	H	H	H	H	H	H	B	H	H	H	H	H	H	H	H	H	H	H	H	H
be_C_T_chr2_7153799	2	7153799	-	T/C	B	B	B	B	B	B	B	B	B	B	B	H	B	B	B	B	B	B	B	B	B	B	B	U	B	B	H	B	B	B	B	B	B	B	B	B	B	B	B	B	H	B	B	B	H
be_C_T_chr2_9637154	2	9637154	+	A/G	A	H	B	B	B	B	B	B	B	B	B	B	B	B	B	B	B	B	B	U	B	B	B	U	B	H	U	B	B	B	B	B	B	B	B	U	B	B	B	U	B	B	B	H	H
be_C_T_chr3_11739288	3	11739288	+	A/G	H	B	B	H	U	H	H	U	H	B	H	H	H	H	B	U	H	H	H	B	H	H	H	H	H	H	B	H	B	H	H	B	B	H	H	U	B	H	U	H	B	B	H	H	U
be_C_T_chr3_18933467	3	18933467	-	T/C	H	B	B	B	B	B	B	B	B	B	B	B	H	B	H	B	B	H	B	B	B	B	B	B	B	B	B	B	B	H	B	B	B	B	B	B	B	B	H	H	B	B	B	H	B
be_C_T_chr3_235494	3	235494	-	T/C	B	H	H	B	B	B	B	B	B	H	B	B	H	B	B	B	B	B	B	B	B	B	B	B	B	H	H	B	B	H	B	B	H	B	B	H	B	B	H	H	H	B	B	B	B
be_C_T_chr3_2644499	3	2644499	-	T/C	B	H	B	B	B	H	B	B	B	B	B	B	H	B	B	B	B	B	B	U	B	B	B	B	B	B	B	H	B	B	B	B	B	B	B	B	B	U	H	B	B	B	B	B	B
be_C_T_chr3_4524379	3	4524379	+	A/G	B	B	B	H	B	H	B	B	B	B	B	B	B	B	B	B	B	B	B	B	B	B	B	B	B	B	B	B	B	B	B	B	H	B	B	B	B	B	B	B	B	B	B	B	B
be_C_T_chr3_8407819	3	8407819	+	A/G	H	B	B	B	B	B	B	B	B	B	B	B	B	B	B	B	B	B	B	B	B	H	B	B	B	B	B	B	B	B	B	B	B	B	B	B	B	B	H	B	B	B	B	H	B
be_C_T_chr4_16175206	4	16175206	-	T/C	H	B	B	B	B	H	B	B	B	B	B	B	H	B	B	B	B	B	B	B	B	B	B	B	B	B	H	H	B	H	B	B	B	B	B	H	B	B	H	H	B	B	B	H	B
be_C_T_chr4_17156806	4	17156806	+	A/G	A	H	B	B	A	B	H	H	B	B	A	H	H	H	B	A	H	A	B	H	B	H	A	B	A	B	H	A	H	A	H	B	H	A	A	A	B	B	H	H	B	H	H	H	B
be_C_T_chr4_17637966	4	17637966	+	A/G	H	B	B	H	H	U	H	H	B	H	H	H	B	B	B	A	B	A	B	H	B	B	A	B	H	B	A	H	B	B	B	B	H	H	A	A	H	H	B	A	B	H	B	B	B
be_C_T_chr4_18600968	4	18600968	+	A/G	H	H	A	B	B	B	B	H	B	H	B	H	H	H	B	B	H	U	B	A	B	A	A	H	B	B	H	A	H	A	B	B	B	B	B	A	H	A	A	H	H	B	H	A	B
be_C_T_chr4_19566102	4	19566102	-	T/C	H	B	B	B	B	U	B	B	B	H	B	B	B	B	B	B	B	B	B	B	B	B	B	B	B	B	H	B	B	B	B	B	B	B	B	U	B	B	B	H	B	B	B	H	B
be_C_T_chr4_23429474	4	23429474	+	A/G	B	B	B	B	B	B	B	B	B	B	B	B	B	B	B	B	B	B	B	B	B	B	B	B	B	B	B	B	B	B	B	B	B	B	B	B	B	B	B	B	B	B	B	B	B
be_C_T_chr4_5553214	4	5553214	+	A/G	B	B	B	B	B	B	B	B	B	B	B	B	B	B	B	B	B	H	B	B	B	B	B	B	B	B	B	B	B	B	B	B	B	B	H	B	B	B	B	B	B	B	B	B	B
be_C_T_chr4_6993124	4	6993124	+	A/G	B	B	B	H	B	B	H	B	B	B	B	B	U	B	H	U	B	B	B	B	B	B	B	B	B	B	U	B	B	B	B	U	U	B	B	B	H	B	B	U	B	B	B	U	U
be_C_T_chr4_9395404	4	9395404	+	A/G	A	H	B	H	A	U	A	A	A	A	A	A	A	A	H	B	A	A	A	A	A	H	A	H	A	H	B	A	A	A	A	A	H	A	A	B	H	A	A	B	H	H	A	A	B
be_C_T_chr4_random_64464	4	64464	+	A/G	B	B	B	B	B	B	B	B	B	B	B	B	B	B	B	B	H	B	B	B	B	H	B	B	B	B	B	H	B	B	B	B	H	B	H	B	B	B	B	B	B	B	B	B	B
be_C_T_chr5_10489883	5	10489883	-	T/C	U	H	H	H	H	H	B	H	H	H	B	B	H	B	H	H	H	H	H	H	H	U	B	B	H	H	H	B	B	H	B	B	H	H	B	H	B	H	H	B	H	B	B	U	H
be_C_T_chr5_18718827	5	18718827	+	A/G	B	B	B	U	B	B	B	B	B	B	B	B	B	B	B	H	B	H	B	B	B	H	B	B	B	B	H	H	B	H	B	B	H	B	B	H	B	B	H	H	H	H	B	B	B
be_C_T_chr5_19649349	5	19649349	+	A/G	H	B	B	H	H	B	B	B	B	B	B	B	H	B	B	H	H	H	B	A	B	H	A	H	B	B	H	H	H	H	H	B	A	B	B	A	H	A	B	H	H	H	B	H	B
be_C_T_chr5_20191341	5	20191341	-	T/C	B	H	B	A	B	H	B	B	B	H	B	B	B	B	B	H	B	B	B	B	B	B	B	U	B	H	B	B	B	H	B	B	H	B	B	B	B	B	H	B	H	B	B	B	H
be_C_T_chr5_21630568	5	21630568	+	A/G	B	H	B	H	B	B	B	B	B	H	B	B	B	B	B	B	B	B	B	B	B	B	B	U	B	H	B	B	B	B	H	B	H	B	H	B	B	B	B	B	H	B	B	B	B
be_C_T_chr5_2203568	5	2203568	-	T/C	B	B	B	A	B	U	B	B	B	B	B	H	B	B	B	B	B	B	B	B	A	B	B	B	B	B	B	B	B	B	B	B	A	H	B	B	B	B	B	B	B	B	B	B	B
be_C_T_chr5_23512702	5	23512702	-	T/C	B	H	H	H	H	H	B	B	H	H	H	B	B	H	B	H	H	H	H	H	H	H	H	H	B	H	B	H	B	H	H	B	H	H	B	B	H	H	H	B	H	H	H	B	H
be_C_T_chr5_24013162	5	24013162	-	T/C	B	H	U	H	H	H	H	H	H	H	H	H	H	H	B	H	H	H	H	H	H	H	H	H	H	H	H	H	H	H	H	B	H	H	H	H	H	H	B	H	H	H	H	B	H
be_C_T_chr5_2650482	5	2650482	-	T/C	B	B	H	H	B	B	B	B	B	B	B	B	B	B	B	B	B	B	B	B	B	B	B	B	B	B	H	H	B	B	B	B	H	B	B	B	B	B	B	H	H	B	B	B	B
be_C_T_chr5_4116949	5	4116949	-	T/C	B	B	B	B	B	B	B	B	B	H	B	B	B	B	B	B	B	B	B	B	B	B	B	B	B	B	B	B	B	B	B	B	B	B	B	B	B	B	H	B	B	B	B	B	B
be_C_T_chr5_8021993	5	8021993	-	T/C	B	B	B	B	B	B	B	B	B	B	B	B	B	H	B	B	B	B	B	B	B	B	B	H	H	B	B	H	B	B	H	B	B	B	B	B	B	B	B	B	B	A	B	H	B
be_C_T_chr5_8503842	5	8503842	+	A/G	B	B	B	A	B	H	B	B	B	H	B	B	B	B	B	B	B	B	B	B	B	H	B	H	B	B	B	H	B	H	B	B	H	B	B	B	B	B	H	B	H	B	B	B	B
be_C_T_chr5_9040383	5	9040383	-	T/C	B	B	B	A	B	H	H	B	B	B	B	H	B	B	B	A	B	B	B	B	B	B	H	B	H	B	U	B	B	B	B	B	H	B	H	H	B	B	B	U	H	B	B	H	B
be_C_T_chr6_11948938	6	11948938	-	T/C	B	B	B	H	B	U	B	B	B	B	B	B	B	B	B	A	B	H	B	B	B	B	B	B	B	B	H	B	B	B	B	B	H	B	B	A	B	B	B	A	B	B	B	B	B
be_C_T_chr6_1223372	6	1223372	-	T/C	H	B	B	H	B	B	H	B	B	H	B	H	B	B	B	B	B	B	B	A	B	B	H	B	B	B	H	B	B	B	B	B	B	B	B	B	B	B	B	H	H	H	B	H	H
be_C_T_chr6_17358596	6	17358596	-	T/C	B	B	B	B	B	B	B	B	B	B	B	H	B	B	B	H	B	A	B	B	B	B	B	B	B	B	B	B	B	B	B	B	B	B	H	H	B	B	B	H	B	B	B	B	B
be_C_T_chr6_2688971	6	2688971	+	A/G	H	B	B	H	B	B	B	B	B	H	B	B	B	B	B	B	B	B	B	B	B	H	B	U	B	B	B	H	B	B	B	B	B	B	B	H	B	B	B	B	H	B	B	H	B
be_C_T_chr6_3635806	6	3635806	+	A/G	A	H	H	B	A	B	H	H	A	A	A	A	B	A	B	B	A	B	A	A	H	H	A	H	A	H	H	H	H	H	A	B	H	A	H	H	B	A	B	H	H	A	A	H	A
be_C_T_chr7_11949576	7	11949576	+	A/G	H	H	B	H	B	U	H	H	B	H	B	B	H	B	B	A	B	B	B	B	B	B	B	H	B	H	A	H	A	B	B	B	H	H	B	H	B	B	B	H	B	H	B	A	H
be_C_T_chr7_1265636	7	1265636	-	T/C	H	B	B	B	B	B	B	B	B	B	B	B	B	B	B	B	B	H	B	B	H	B	B	B	B	B	H	B	B	B	B	B	B	B	B	H	B	B	B	H	B	B	B	H	B
be_C_T_chr7_14061143	7	14061143	+	A/G	B	B	B	B	B	A	B	B	B	B	B	H	B	B	B	B	B	B	B	B	B	B	B	B	B	B	B	H	B	B	B	B	B	B	H	B	B	B	B	B	B	B	B	B	B
be_C_T_chr7_16356393	7	16356393	-	T/C	B	B	B	H	B	U	B	B	B	B	B	B	B	B	B	A	B	B	B	A	B	B	A	B	B	B	H	B	B	H	B	B	H	B	B	H	B	A	H	H	B	B	B	B	B
be_C_T_chr7_1719171	7	1719171	-	T/C	H	H	B	B	B	B	B	H	B	B	B	B	H	B	B	B	B	A	B	B	B	H	B	U	H	H	H	H	B	B	B	B	B	H	H	H	B	B	B	H	B	H	B	H	B
be_C_T_chr7_4155152	7	4155152	-	T/C	H	B	B	B	B	B	B	B	H	B	B	H	B	H	B	B	B	B	B	B	H	B	B	B	B	B	B	B	B	B	H	B	B	H	B	B	B	B	B	B	B	B	B	B	B
be_C_T_chr8_11397285	8	11397285	+	A/G	B	B	B	B	B	B	B	B	B	B	B	H	U	B	B	B	B	B	B	B	B	B	B	B	B	B	B	H	B	H	B	B	B	B	B	B	B	B	U	B	B	B	B	B	B
be_C_T_chr8_17242546	8	17242546	-	T/C	A	H	B	H	A	B	H	H	A	H	A	A	H	A	B	B	A	A	A	A	A	H	A	A	A	A	B	H	H	A	A	B	H	A	A	B	H	A	H	B	A	H	A	H	A
be_C_T_chr8_21119138	8	21119138	-	T/C	B	B	B	B	B	H	B	B	B	B	B	B	B	B	B	H	B	B	B	B	B	B	B	B	B	B	B	B	B	B	B	B	B	B	B	B	B	B	B	B	B	B	B	B	B
be_C_T_chr8_21603571	8	21603571	+	A/G	B	B	B	B	B	H	B	B	B	B	B	B	B	B	B	B	B	B	B	B	B	B	B	B	B	B	B	B	B	B	B	B	B	B	B	B	B	B	B	B	B	B	B	B	B
be_C_T_chr8_2202080	8	2202080	+	A/G	B	B	B	B	B	B	B	B	B	B	B	B	B	B	B	B	B	B	B	B	B	B	B	B	B	B	H	B	B	B	B	B	B	B	B	H	B	B	B	H	B	B	B	B	B
be_C_T_chr8_730669	8	730669	-	T/C	B	B	B	B	B	B	H	B	B	B	B	B	B	B	B	B	B	B	B	B	B	B	B	B	B	B	H	B	B	B	B	B	B	B	B	H	B	B	B	H	B	B	B	B	B
be_C_T_chr8_9912507	8	9912507	+	A/G	B	H	H	H	B	H	B	B	B	B	B	B	H	B	B	H	B	B	B	B	B	H	B	B	B	H	H	B	B	B	B	B	H	B	B	H	B	B	B	H	H	B	B	B	H
be_C_T_chr9_12364075	9	12364075	-	T/C	U	H	B	H	H	B	H	B	B	B	H	H	H	B	U	U	H	H	H	B	H	U	H	H	H	B	H	H	B	H	H	B	H	H	H	U	H	B	H	H	H	H	H	H	B
be_C_T_chr9_13958919	9	13958919	-	T/C	B	A	B	B	B	B	B	H	B	H	U	B	B	U	B	H	B	B	U	B	B	B	U	B	H	B	H	B	B	B	B	B	B	B	B	H	B	U	B	H	B	B	B	B	B
be_C_T_chr9_15895588	9	15895588	-	T/C	B	B	U	B	B	B	B	B	B	B	B	B	B	B	B	B	B	U	B	B	B	B	B	B	B	U	B	B	B	B	B	B	U	B	B	B	B	B	B	B	U	B	B	B	U
be_C_T_chr9_20269367	9	20269367	+	A/G	H	H	H	H	H	H	B	H	H	H	H	H	B	H	B	H	H	U	H	U	B	H	H	H	H	H	H	H	H	H	H	B	H	B	H	H	B	B	H	H	H	H	H	H	H
be_C_T_chr9_5613952	9	5613952	-	T/C	B	B	B	B	B	B	B	B	B	B	B	B	B	B	B	B	B	B	B	B	B	B	B	H	B	B	B	B	B	B	B	B	B	B	B	B	B	B	B	B	B	B	B	B	B
be_C_T_chrUn_18204717	UN	18204717	-	T/C	H	H	B	B	B	H	H	B	H	H	H	B	B	H	B	H	H	U	H	H	B	B	B	B	H	B	B	H	B	H	H	B	B	H	H	B	B	H	H	B	B	U	H	H	H
be_C_T_chrUn_21790000	UN	21790000	+	A/G	B	B	H	H	B	H	B	B	B	B	B	B	H	B	B	H	B	B	B	B	B	B	B	U	B	H	H	B	B	B	B	B	H	B	B	H	B	B	B	H	B	B	B	B	B
be_C_T_chrUn_24862223	UN	24862223	-	T/C	B	H	H	H	B	U	H	B	H	H	H	H	H	U	B	H	H	H	H	H	H	H	H	H	U	H	H	H	H	H	A	B	H	H	H	H	H	H	U	B	H	H	H	H	H
be_C_T_chrUn_26955129	UN	26955129	-	T/C	B	B	B	B	B	B	B	B	B	B	B	B	H	B	B	B	B	B	B	B	B	B	B	B	B	B	B	B	B	B	B	B	B	B	B	B	B	B	B	B	B	B	B	B	B
be_C_T_chrUn_32456792	UN	32456792	+	A/G	H	H	H	U	H	B	B	B	B	H	B	H	H	B	B	H	H	U	H	B	H	B	H	H	H	H	B	B	B	H	H	B	H	H	H	B	B	B	H	H	H	B	B	H	B
be_C_T_chrUn_35548674	UN	35548674	-	T/C	H	B	H	H	B	U	H	H	B	B	B	B	H	B	A	A	B	A	B	B	B	H	B	U	B	B	B	H	H	B	B	A	H	B	H	B	B	B	H	B	B	B	B	A	B
be_C_T_chrUn_38068310	UN	38068310	+	A/G	A	B	B	A	H	U	H	H	B	B	H	B	A	B	H	H	B	B	B	A	A	H	A	B	H	B	H	H	B	B	B	B	H	H	H	H	H	A	H	A	H	H	B	H	H
be_C_T_chrUn_38952279	UN	38952279	-	T/C	B	B	B	B	B	H	B	B	B	B	B	B	B	B	B	H	B	B	B	B	B	B	B	B	B	B	B	B	B	B	B	B	B	B	B	B	B	B	B	B	B	B	B	B	B
be_C_T_chrUn_4872157	UN	4872157	-	T/C	U	H	B	H	H	H	B	B	H	H	U	H	B	B	B	B	H	B	H	B	B	H	B	H	B	H	H	B	B	H	H	B	B	H	H	H	B	B	B	B	H	B	H	B	H
be_C_T_chrUn_5436782	UN	5436782	+	A/G	H	H	H	H	H	H	H	B	H	H	H	H	B	H	U	H	H	H	H	H	H	H	H	H	H	H	H	H	H	H	A	U	H	H	B	H	B	B	H	H	H	U	H	H	H
be_C_T_chrUn_7953264	UN	7953264	+	A/G	B	H	B	B	B	B	B	B	B	B	B	B	B	B	B	A	B	B	B	B	B	B	B	B	B	B	B	B	B	B	B	B	B	B	B	B	B	B	B	B	B	B	B	B	B
be_G_A_chr1_11505475	1	11505475	-	T/C	H	B	B	B	B	B	B	B	B	H	B	B	H	B	B	B	B	H	B	B	B	H	B	B	B	B	H	H	B	H	B	B	B	B	B	H	B	B	H	H	B	B	B	H	B
be_G_A_chr1_18883369	1	18883369	+	A/G	U	H	B	B	B	B	U	B	H	H	H	B	B	B	B	B	B	U	H	B	B	B	B	B	H	H	B	B	B	B	H	B	B	B	U	B	H	H	U	B	H	U	B	U	B
be_G_A_chr1_20420677	1	20420677	+	A/G	U	B	B	H	U	B	H	H	H	H	H	B	B	B	B	B	B	B	H	H	H	B	B	H	H	U	H	B	H	H	H	B	B	B	H	B	H	B	B	H	U	B	H	B	U
be_G_A_chr1_2693043	1	2693043	-	T/C	H	H	B	B	B	B	B	B	B	B	B	B	B	B	H	B	B	B	B	B	B	B	B	B	B	B	H	B	H	B	B	B	B	B	H	H	H	B	B	H	B	B	B	A	B
be_G_A_chr1_4644161	1	4644161	+	A/G	B	B	B	B	B	B	H	B	B	H	B	B	H	B	B	B	B	B	B	H	B	B	B	B	H	B	A	B	B	B	B	B	B	B	B	B	B	H	B	H	B	H	B	B	B
be_G_A_chr1_7159740	1	7159740	+	A/G	B	B	B	H	B	H	H	B	B	H	H	H	H	B	B	H	B	H	B	H	B	H	B	H	B	B	H	H	B	H	B	B	H	H	B	H	B	B	H	H	B	H	B	H	B
be_G_A_chr10_10020590	10	10020590	+	A/G	B	B	B	B	B	B	B	B	B	B	B	B	B	B	B	B	B	B	B	B	B	B	B	B	B	B	B	B	U	B	B	B	H	B	B	B	B	B	H	B	B	B	B	B	B
be_G_A_chr10_11051727	10	11051727	-	T/C	B	H	B	H	B	H	B	B	B	H	B	B	B	B	B	H	H	H	H	B	H	B	B	B	B	H	H	H	B	B	B	B	H	B	B	H	B	H	H	B	H	B	B	B	B
be_G_A_chr10_11533493	10	11533493	-	T/C	B	H	B	H	B	H	B	B	B	H	B	B	H	B	B	A	B	B	B	B	B	B	B	B	B	H	H	B	B	B	B	B	B	B	B	H	B	B	B	H	H	B	B	H	B
be_G_A_chr10_6616899	10	6616899	+	A/G	B	B	B	B	B	B	B	B	B	B	B	B	B	B	B	B	B	B	B	B	B	B	B	B	B	B	H	B	B	B	B	B	B	B	B	A	B	B	B	H	B	B	B	B	B
be_G_A_chr10_7587438	10	7587438	-	T/C	B	B	H	B	H	B	B	B	H	H	H	B	B	B	B	B	H	B	H	A	A	H	A	U	A	H	B	B	B	A	B	B	B	H	B	B	B	A	B	B	B	H	H	B	A
be_G_A_chr11_16036245	11	16036245	+	A/G	B	B	B	H	B	H	B	B	B	B	B	B	B	B	B	B	B	B	B	B	B	B	B	B	B	B	B	B	B	B	B	B	H	B	B	B	B	B	B	B	B	B	B	B	B
be_G_A_chr11_16549696	11	16549696	-	T/C	B	H	B	H	B	H	H	B	B	H	B	B	H	B	B	H	B	B	B	B	B	B	B	U	B	H	H	B	H	B	B	B	H	B	B	H	B	B	B	H	H	B	B	H	B
be_G_A_chr11_3122739	11	3122739	+	A/G	B	B	B	H	B	H	B	B	B	H	B	B	B	B	B	B	B	B	B	B	B	H	B	U	B	H	H	H	B	H	B	B	H	B	B	H	B	B	H	A	B	B	B	B	B
be_G_A_chr11_5043196	11	5043196	+	A/G	B	B	B	B	B	B	B	B	B	B	B	H	B	H	B	B	H	H	B	B	A	B	B	B	B	B	B	B	B	B	B	B	B	H	B	B	B	B	B	B	B	B	B	B	B
be_G_A_chr11_6480292	11	6480292	+	A/G	B	H	B	H	B	H	U	U	B	H	B	B	B	B	U	B	B	B	B	B	B	H	B	U	B	H	H	H	U	H	B	B	H	B	B	H	B	B	H	H	H	B	B	H	B
be_G_A_chr12_14127862	12	14127862	-	T/C	B	H	H	B	B	B	B	B	B	H	B	B	B	H	B	B	B	B	B	B	H	B	B	H	B	H	B	B	B	H	B	B	B	B	B	B	H	B	H	B	H	B	B	B	H
be_G_A_chr12_14704489	12	14704489	+	A/G	H	B	B	H	H	H	B	H	B	H	H	B	B	A	B	B	H	A	B	H	H	B	H	U	H	B	H	B	B	B	H	U	H	H	A	H	B	B	B	B	B	B	B	A	B
be_G_A_chr12_20488465	12	20488465	+	A/G	B	B	B	B	B	B	B	B	B	U	B	B	B	B	B	U	B	B	B	B	B	H	B	B	B	B	U	B	B	B	B	B	B	B	B	U	B	B	B	B	B	B	B	B	B
be_G_A_chr12_4594784	12	4594784	+	A/G	H	B	H	H	H	H	H	H	B	B	B	H	H	B	B	H	B	B	B	B	B	B	B	B	B	B	H	B	B	H	H	B	H	B	B	H	B	B	A	H	B	H	B	B	H
be_G_A_chr12_8889344	12	8889344	+	A/G	A	H	B	A	A	U	B	H	A	H	A	A	B	A	H	A	A	A	A	A	A	A	A	H	A	H	H	A	B	A	A	B	A	A	A	H	H	A	H	B	H	H	A	H	H
be_G_A_chr12_9396440	12	9396440	-	T/C	B	H	H	B	B	B	B	B	B	B	B	B	B	B	B	H	B	B	B	B	B	H	H	B	B	H	U	B	B	B	B	B	B	B	B	U	B	H	B	B	H	H	B	B	H
be_G_A_chr13_11499175	13	11499175	+	A/G	H	H	H	H	H	H	H	H	H	H	H	H	H	H	B	H	H	H	H	H	H	H	H	H	H	H	H	H	H	H	H	B	H	H	H	H	B	H	H	H	H	H	H	H	H
be_G_A_chr13_12000712	13	12000712	-	T/C	H	H	H	H	B	H	H	B	B	H	H	H	H	H	B	H	B	H	H	H	A	U	H	H	B	H	B	H	H	H	H	H	B	B	H	B	B	H	H	B	H	H	U	H	U
be_G_A_chr13_13393642	13	13393642	-	T/C	B	B	B	B	B	B	B	B	B	B	B	B	H	B	B	B	B	B	B	B	B	B	B	B	B	B	B	B	B	H	B	B	B	B	H	B	B	B	B	B	B	B	H	B	B
be_G_A_chr13_15843798	13	15843798	+	A/G	H	H	B	B	B	B	B	B	B	B	H	B	U	U	B	B	B	B	B	B	B	B	B	B	B	B	B	H	B	B	H	B	B	B	B	B	B	B	B	B	H	B	H	B	H
be_G_A_chr13_17684612	13	17684612	-	T/C	H	H	H	H	H	H	H	H	H	H	H	H	H	H	B	H	H	H	H	H	H	H	H	H	H	H	H	H	H	H	H	B	B	H	H	H	H	H	H	H	H	H	H	B	H
be_G_A_chr13_19706352	13	19706352	+	A/G	A	A	A	A	H	A	H	B	A	A	A	A	B	A	U	A	H	A	H	H	A	A	A	H	A	A	A	H	H	A	A	B	A	A	A	A	H	A	U	A	A	H	A	H	A
be_G_A_chr13_4623564	13	4623564	+	A/G	H	A	H	H	A	B	B	A	A	H	A	A	H	A	A	H	A	H	A	A	A	H	A	H	A	A	H	H	H	H	A	H	B	A	H	H	B	A	H	H	H	H	A	H	A
be_G_A_chr13_6036421	13	6036421	+	A/G	H	H	B	H	B	U	B	B	B	B	B	B	H	B	B	H	B	A	B	B	B	B	B	U	B	H	B	B	B	H	B	B	H	B	H	B	B	B	H	B	B	H	B	H	B
be_G_A_chr13_7975602	13	7975602	+	A/G	B	B	B	B	B	B	B	B	B	B	B	B	B	B	B	B	B	B	U	B	B	A	B	B	B	B	B	B	B	B	U	B	B	B	B	B	B	B	B	B	B	B	U	B	U
be_G_A_chr14_10040463	14	10040463	+	A/G	B	B	B	B	B	H	B	B	B	B	B	B	B	B	B	B	B	B	B	B	B	H	B	B	B	B	B	B	H	B	B	B	B	B	B	B	H	B	B	B	B	B	B	B	B
be_G_A_chr14_1694521	14	1694521	+	A/G	B	H	B	H	B	U	B	B	B	B	B	B	B	B	B	A	B	B	B	H	B	B	H	B	B	H	B	B	B	B	B	B	H	B	H	B	B	B	B	B	H	B	B	B	B
be_G_A_chr14_2145162	14	2145162	-	T/C	B	H	B	H	B	H	B	H	B	B	H	H	B	H	B	B	B	U	H	B	H	H	B	B	H	H	B	B	H	H	B	B	H	U	H	B	B	B	H	B	H	H	B	H	B
be_G_A_chr14_25732284	14	25732284	-	T/C	H	H	H	H	H	H	H	H	H	H	H	H	H	H	B	H	H	H	H	H	H	H	H	U	H	H	H	H	H	H	H	B	H	H	H	H	H	H	H	H	H	H	B	H	H
be_G_A_chr14_26602245	14	26602245	+	A/G	A	H	A	B	A	H	B	B	A	B	A	H	H	A	B	B	A	B	A	B	H	A	B	B	H	H	H	B	B	H	A	B	H	A	B	H	B	B	H	H	H	H	A	H	A
be_G_A_chr14_8489953	14	8489953	+	A/G	B	B	B	H	B	U	B	B	B	B	B	B	B	B	H	H	B	B	B	B	B	H	H	B	H	B	H	B	B	H	B	U	B	B	B	A	B	B	H	U	B	B	B	B	B
be_G_A_chr15_10024939	15	10024939	+	A/G	H	H	B	H	B	H	B	B	B	H	B	H	B	B	B	H	B	H	B	B	B	H	B	B	H	H	H	H	H	H	B	B	H	H	H	U	B	H	H	H	H	H	B	H	H
be_G_A_chr15_11043131	15	11043131	+	A/G	H	H	H	H	H	U	H	H	H	H	H	H	B	H	B	B	H	H	H	B	H	H	B	H	H	H	B	H	B	H	H	B	H	H	H	B	H	B	H	H	H	H	H	U	H
be_G_A_chr15_11551852	15	11551852	+	A/G	H	H	B	A	A	A	H	H	A	A	A	A	H	A	B	B	A	A	A	B	A	A	B	A	A	A	A	A	B	A	A	B	B	A	H	A	H	A	H	H	H	H	A	B	A
be_G_A_chr15_17882024	15	17882024	+	A/G	H	H	H	H	H	H	H	H	H	H	H	A	H	H	A	U	H	H	H	A	H	H	A	H	H	H	H	H	H	H	H	H	A	H	H	H	H	A	H	H	H	H	H	H	H
be_G_A_chr15_18446276	15	18446276	-	T/C	B	B	H	B	B	A	B	B	B	B	B	B	B	B	B	U	B	B	B	B	B	B	B	B	B	B	B	H	B	B	B	B	B	B	B	B	B	B	B	H	B	B	B	B	B
be_G_A_chr15_240669	15	240669	-	T/C	B	H	H	B	B	B	B	B	B	B	B	B	B	B	B	B	B	B	B	B	B	B	B	B	B	B	B	B	B	B	B	B	H	B	B	B	B	B	B	B	H	B	B	B	B
be_G_A_chr15_4158631	15	4158631	-	T/C	H	A	H	A	A	H	H	H	A	H	B	A	H	A	H	H	H	U	H	A	U	H	H	H	H	H	H	H	B	A	A	H	A	H	U	H	H	H	H	B	A	B	A	H	A
be_G_A_chr15_9128835	15	9128835	+	A/G	B	B	B	H	B	H	B	B	B	B	B	B	B	B	H	B	B	B	B	B	B	H	H	B	B	H	H	B	B	H	B	B	H	B	B	H	B	B	H	B	B	B	B	H	B
be_G_A_chr16_18372795	16	18372795	-	T/C	H	H	B	U	B	H	B	B	B	B	B	H	H	B	B	H	B	B	B	B	B	H	B	U	B	H	H	H	B	U	B	B	H	B	B	H	B	B	H	H	H	B	B	H	B
be_G_A_chr16_18825458	16	18825458	+	A/G	B	A	A	A	H	A	B	B	H	H	H	H	H	A	H	A	B	B	A	H	A	H	B	H	B	A	H	H	H	A	H	B	A	H	H	H	A	B	A	H	A	H	A	H	A
be_G_A_chr16_20305922	16	20305922	-	T/C	H	H	U	H	H	H	U	H	H	H	H	H	H	H	B	H	H	H	H	H	H	H	H	H	H	H	H	H	H	H	H	B	H	H	H	H	B	H	H	H	H	H	H	U	H
be_G_A_chr16_21788835	16	21788835	-	T/C	B	B	B	B	B	B	B	B	B	B	B	B	B	B	B	B	B	B	B	B	B	B	B	B	B	B	B	B	B	B	B	B	B	B	B	H	B	B	B	B	B	B	B	B	B
be_G_A_chr16_3679355	16	3679355	+	A/G	H	B	B	H	U	H	H	H	H	B	H	B	H	H	B	H	H	U	H	H	H	H	H	H	H	B	H	H	H	H	H	B	H	H	H	H	B	H	H	H	B	B	B	H	B
be_G_A_chr16_9047949	16	9047949	-	T/C	B	H	H	B	H	B	B	B	B	B	H	H	B	H	B	H	H	B	B	B	B	B	A	H	H	H	B	H	B	H	H	B	B	H	H	B	B	A	B	B	H	H	B	H	H
be_G_A_chr16_random_527707	16	527707	+	A/G	H	H	H	H	H	H	H	H	H	H	H	H	H	H	B	H	H	H	H	H	H	H	H	H	H	H	H	H	B	H	H	B	H	H	H	H	B	H	H	U	H	H	H	H	H
be_G_A_chr17_11465611	17	11465611	-	T/C	H	H	H	H	B	U	H	B	B	H	B	B	H	B	B	A	B	B	B	B	B	B	B	U	B	B	H	B	B	B	B	B	H	B	B	H	B	B	H	H	B	H	B	H	H
be_G_A_chr17_2684678	17	2684678	+	A/G	H	B	H	A	A	H	B	H	H	A	B	B	H	B	H	B	H	B	H	B	A	B	H	H	A	H	A	H	B	H	B	B	A	H	H	A	B	A	H	H	A	H	H	A	H
be_G_A_chr17_random_572282	17	572282	-	T/C	B	H	H	B	B	B	B	B	B	H	B	B	H	B	B	B	H	B	H	B	H	B	B	U	B	B	B	A	B	H	H	B	B	B	H	B	H	B	H	B	B	U	B	B	H
be_G_A_chr18_12941326	18	12941326	+	A/G	B	B	B	H	B	U	B	B	B	B	B	B	H	B	B	A	B	B	B	B	B	H	B	U	B	B	A	H	B	H	B	B	H	B	B	A	B	B	H	A	H	B	B	H	B
be_G_A_chr18_13867056	18	13867056	+	A/G	B	B	B	B	B	B	B	B	B	B	B	B	B	B	B	B	B	B	B	B	B	B	B	B	B	B	B	H	B	B	B	B	B	B	B	B	B	B	B	B	H	B	B	B	B
be_G_A_chr18_17863175	18	17863175	-	T/C	B	B	B	H	B	H	B	B	B	B	B	B	H	B	B	U	B	B	B	B	B	H	B	B	B	B	H	H	B	B	B	B	H	B	B	H	B	B	H	H	H	B	B	H	B
be_G_A_chr18_19222989	18	19222989	-	T/C	B	H	B	H	B	U	B	B	B	H	B	B	B	B	B	A	B	B	B	B	H	H	B	U	B	H	H	B	B	B	B	B	H	B	B	B	B	B	B	H	B	B	B	B	H
be_G_A_chr18_19772574	18	19772574	+	A/G	B	B	B	B	H	H	B	B	B	B	B	H	B	B	B	U	B	B	B	B	B	H	B	B	B	B	H	H	B	H	B	B	B	B	B	B	H	B	H	H	B	B	B	B	B
be_G_A_chr18_23174356	18	23174356	+	A/G	B	B	B	H	B	B	B	B	B	B	B	B	B	B	B	B	B	B	H	B	B	H	H	H	B	B	B	B	B	B	B	B	H	B	B	B	H	B	B	B	B	B	B	B	B
be_G_A_chr18_28569326	18	28569326	+	A/G	H	H	U	H	H	H	H	H	H	H	H	H	H	H	B	H	H	H	H	H	H	H	H	H	H	H	H	H	H	H	H	B	H	H	H	H	H	H	U	H	H	H	H	H	H
be_G_A_chr18_6122768	18	6122768	+	A/G	B	B	B	B	B	B	B	B	B	H	B	B	B	B	B	H	B	B	B	B	B	B	B	B	B	B	B	B	B	H	B	B	B	B	B	B	B	B	H	H	B	B	B	B	H
be_G_A_chr18_6605751	18	6605751	-	T/C	B	U	B	B	B	B	B	B	B	B	B	B	B	B	B	B	B	B	B	B	H	B	B	B	B	B	B	B	B	B	B	B	B	H	B	B	B	B	B	B	U	B	B	B	B
be_G_A_chr18_7546968	18	7546968	+	A/G	B	B	B	B	B	U	H	B	B	B	B	B	B	B	B	B	B	B	B	B	B	B	B	B	B	B	H	B	B	B	B	B	B	B	B	H	B	B	B	B	B	B	B	B	B
be_G_A_chr18_random_765977	18	765977	+	A/G	B	B	B	B	B	B	B	B	B	B	B	B	B	B	B	B	B	B	B	B	B	H	B	B	B	B	H	H	B	H	B	B	B	B	B	H	B	H	H	H	H	H	B	H	B
be_G_A_chr19_12049974	19	12049974	-	T/C	B	H	B	B	B	H	H	B	B	U	H	B	H	B	H	H	H	B	B	B	H	B	B	H	U	H	B	B	B	H	B	B	H	B	B	B	B	B	H	H	H	H	B	B	H
be_G_A_chr19_1748311	19	1748311	-	T/C	B	B	B	H	B	H	B	B	B	B	B	B	H	B	B	H	B	A	B	B	B	B	B	B	B	B	H	B	B	B	B	B	H	B	H	H	B	B	B	H	B	H	B	B	B
be_G_A_chr19_2169721	19	2169721	-	T/C	B	H	H	A	H	H	B	B	B	B	B	B	B	B	U	B	H	B	H	B	B	H	B	B	H	H	B	H	B	A	B	B	A	B	B	B	B	B	H	H	H	H	H	B	H
be_G_A_chr19_21818628	19	21818628	+	A/G	B	H	B	B	H	B	H	B	B	U	B	H	B	B	H	H	B	H	B	A	B	H	H	H	H	H	H	B	H	B	B	B	A	B	H	H	H	U	B	U	B	U	B	H	H
be_G_A_chr19_22813773	19	22813773	+	A/G	B	H	B	B	B	B	B	H	B	H	B	B	B	H	B	H	A	B	B	B	B	H	B	H	H	H	H	B	B	B	H	B	H	H	H	H	B	B	B	H	H	B	B	B	H
be_G_A_chr19_3178747	19	3178747	+	A/G	H	H	H	H	H	H	H	H	H	H	H	H	H	H	B	H	H	H	H	H	H	H	U	H	H	H	H	H	H	H	H	H	H	H	H	H	H	H	H	H	H	H	H	H	H
be_G_A_chr19_4159874	19	4159874	+	A/G	B	B	B	H	B	A	B	B	B	B	B	H	B	B	B	H	B	A	B	B	B	H	B	B	B	B	A	H	B	B	B	B	H	B	H	A	B	B	B	H	B	U	B	H	B
be_G_A_chr19_6618796	19	6618796	-	T/C	B	B	B	B	B	B	B	B	B	B	B	B	H	B	B	B	B	B	B	H	B	H	B	U	B	H	B	B	B	H	B	B	H	B	B	B	B	B	H	B	B	B	B	H	H
be_G_A_chr2_18008989	2	18008989	-	T/C	H	H	H	H	H	B	B	B	A	H	H	H	B	A	B	H	A	A	A	B	A	H	B	B	H	H	B	H	B	H	A	B	H	A	H	H	B	B	B	H	H	B	A	B	B
be_G_A_chr2_18509169	2	18509169	-	T/C	B	B	B	B	B	B	B	B	U	H	B	B	B	B	B	B	B	B	B	B	B	B	B	B	B	B	B	B	B	B	B	B	B	B	B	B	B	U	H	B	H	B	B	B	H
be_G_A_chr2_235677	2	235677	+	A/G	H	B	B	H	B	B	B	B	B	B	B	B	B	B	B	B	B	B	B	B	B	B	B	B	B	B	H	H	B	B	B	B	B	B	B	H	B	B	B	H	H	B	B	H	B
be_G_A_chr2_738556	2	738556	+	A/G	H	B	B	A	B	H	B	B	B	B	B	B	H	B	B	B	B	B	B	B	B	H	B	B	B	B	H	B	B	B	B	B	H	B	B	H	B	B	B	H	H	B	B	H	B
be_G_A_chr3_13237910	3	13237910	-	T/C	H	B	B	U	B	U	B	B	B	H	B	B	B	B	B	B	B	H	H	H	U	H	U	B	H	U	B	B	B	B	H	B	B	H	H	B	B	H	B	B	B	B	B	B	B
be_G_A_chr3_14639693	3	14639693	+	A/G	B	H	B	H	B	H	B	B	B	B	B	B	B	B	B	A	B	H	B	B	B	H	B	U	B	H	A	H	B	H	B	B	A	B	H	A	B	B	B	H	H	B	B	B	A
be_G_A_chr3_15086488	3	15086488	+	A/G	H	B	B	B	B	B	H	B	B	B	B	B	H	B	H	A	B	H	B	B	B	B	B	B	B	B	A	B	B	B	B	B	B	B	A	H	B	B	B	A	B	B	B	A	B
be_G_A_chr3_17969817	3	17969817	+	A/G	B	B	B	B	B	B	B	B	B	H	B	H	H	B	B	H	H	H	B	B	B	H	B	U	A	B	A	A	H	B	B	B	B	U	B	H	B	B	B	U	B	B	B	B	B
be_G_A_chr3_5031664	3	5031664	+	A/G	H	H	H	H	H	H	B	H	H	H	H	H	B	H	B	H	H	H	H	U	H	H	U	H	B	H	H	H	H	H	H	B	H	H	B	H	H	B	B	H	H	U	H	B	H
be_G_A_chr3_714739	3	714739	+	A/G	B	H	B	B	B	B	B	B	B	B	B	B	B	B	B	B	B	B	B	B	B	H	B	U	B	B	B	H	B	B	B	B	B	H	B	B	B	B	B	B	B	B	B	B	B
be_G_A_chr3_7388965	3	7388965	+	A/G	A	B	B	H	B	U	B	B	B	B	B	B	B	B	B	A	B	U	B	B	B	B	B	U	H	H	B	B	B	B	B	B	A	B	B	B	B	B	B	B	H	B	B	H	H
be_G_A_chr3_7837707	3	7837707	-	T/C	B	B	B	B	B	U	H	B	B	B	B	B	B	B	B	B	B	B	B	B	B	B	B	B	B	B	B	B	H	B	B	B	B	B	H	B	B	B	B	B	B	B	B	B	B
be_G_A_chr3_random_256358	3	256358	+	A/G	H	B	B	B	H	H	H	B	B	B	B	B	H	B	B	B	H	A	H	B	B	B	B	B	B	B	H	H	B	B	B	B	B	B	B	H	H	B	B	B	B	H	B	A	B
be_G_A_chr3_random_559331	3	559331	+	A/G	B	B	B	B	B	H	B	B	B	B	B	H	B	B	B	B	B	B	B	B	B	H	B	H	B	H	B	H	B	H	B	B	H	H	B	B	B	B	B	B	H	H	B	B	A
be_G_A_chr4_13771302	4	13771302	+	A/G	B	B	B	H	B	H	B	B	B	B	B	B	B	B	B	H	B	B	B	B	B	B	B	B	B	H	H	H	B	B	B	B	H	B	B	A	B	B	B	H	B	B	B	B	A
be_G_A_chr4_16670859	4	16670859	+	A/G	B	B	B	B	B	B	B	B	B	B	B	B	B	B	B	H	B	B	B	B	B	B	B	B	B	B	B	B	B	B	B	B	B	B	B	B	B	B	B	B	B	B	B	B	B
be_G_A_chr4_22005824	4	22005824	-	T/C	H	H	H	B	H	B	B	H	H	H	H	H	H	H	B	H	H	H	U	B	H	H	H	H	H	B	H	H	H	H	H	B	B	H	H	H	H	H	H	H	H	H	H	B	B
be_G_A_chr4_22480207	4	22480207	-	T/C	B	B	B	B	B	B	B	H	B	B	B	B	B	B	B	H	B	B	B	B	B	B	B	B	B	B	H	H	B	B	B	B	B	B	H	H	B	B	B	H	H	B	B	H	B
be_G_A_chr4_3603872	4	3603872	+	A/G	B	H	A	H	B	H	H	B	B	B	B	H	H	B	H	H	B	B	B	B	B	H	B	B	B	B	B	B	H	B	B	H	H	B	H	B	H	B	H	B	H	H	B	H	B
be_G_A_chr4_4593350	4	4593350	+	A/G	B	B	B	B	B	B	B	B	B	B	B	B	B	B	B	H	B	B	B	B	B	B	B	B	B	B	H	B	B	B	B	B	B	B	B	H	B	B	B	B	B	B	B	B	B
be_G_A_chr4_623358	4	623358	+	A/G	H	H	H	H	H	H	H	H	H	H	H	H	H	H	B	H	H	H	H	B	H	H	H	H	H	H	H	H	H	H	H	H	H	H	H	H	H	B	B	H	H	H	H	H	H
be_G_A_chr5_14310037	5	14310037	-	T/C	H	H	H	B	B	B	B	B	B	B	B	B	B	B	B	B	B	B	B	B	B	B	B	B	B	B	H	H	B	H	B	B	B	B	B	H	B	B	H	H	H	B	B	H	B
be_G_A_chr5_23001675	5	23001675	+	A/G	H	B	B	B	B	B	B	B	B	B	B	B	B	B	B	B	B	B	B	B	B	H	B	B	B	B	B	B	B	U	B	B	B	B	B	H	B	B	H	H	B	B	B	H	B
be_G_A_chr5_6014316	5	6014316	-	T/C	U	H	B	H	B	H	B	B	B	H	B	H	B	B	B	H	B	B	B	B	B	B	B	U	B	H	H	H	H	U	B	B	U	B	B	H	U	B	B	H	U	B	B	H	H
be_G_A_chr5_6579770	5	6579770	-	T/C	B	H	B	B	B	B	B	B	B	A	B	B	B	B	B	B	B	B	B	B	B	H	B	U	B	H	B	H	B	H	B	B	B	B	B	B	B	B	H	B	B	H	B	H	H
be_G_A_chr5_9929083	5	9929083	+	A/G	B	B	B	B	B	H	U	B	B	B	U	B	H	B	B	H	B	U	B	H	B	B	B	B	B	H	H	H	H	H	B	B	B	B	H	H	B	B	B	B	H	U	U	B	H
be_G_A_chr6_10993934	6	10993934	+	A/G	B	B	B	B	B	B	B	B	B	B	B	B	B	B	B	B	B	B	B	B	B	H	B	B	B	B	H	H	B	H	B	B	B	B	B	B	B	B	H	H	B	B	B	B	B
be_G_A_chr6_13419840	6	13419840	-	T/C	A	A	A	A	A	U	U	A	A	A	A	A	U	A	U	U	A	A	A	A	A	A	A	A	A	A	H	A	H	A	A	B	A	A	A	H	B	A	B	U	A	A	A	U	A
be_G_A_chr6_13867336	6	13867336	+	A/G	H	H	B	H	B	B	B	B	B	B	B	B	B	B	B	H	B	A	B	B	B	H	B	B	B	B	H	B	B	H	B	B	H	B	H	H	B	B	H	H	H	B	B	H	B
be_G_A_chr6_14416836	6	14416836	-	T/C	H	H	B	H	B	H	B	B	B	B	B	B	H	B	B	H	B	U	B	B	B	H	B	B	B	B	U	B	B	H	B	B	H	B	B	H	B	B	H	H	H	B	B	H	B
be_G_A_chr6_18759621	6	18759621	-	T/C	B	B	B	H	B	H	B	B	B	B	B	B	B	B	B	H	B	H	B	B	B	B	B	U	B	H	B	B	B	B	B	B	H	H	B	B	B	B	B	B	B	B	B	B	B
be_G_A_chr6_19832730	6	19832730	+	A/G	H	H	H	H	H	H	B	H	H	H	H	H	H	H	B	H	H	U	H	H	H	H	H	H	H	H	H	H	B	H	H	B	H	H	H	H	B	H	H	H	H	B	H	B	H
be_G_A_chr6_20276515	6	20276515	+	A/G	B	B	B	B	B	B	H	B	B	B	B	B	B	B	B	B	B	B	B	B	B	B	B	U	B	H	B	B	B	B	B	B	B	B	B	B	B	B	B	B	B	B	B	B	B
be_G_A_chr6_3152362	6	3152362	+	A/G	H	B	B	H	B	B	B	B	B	H	B	B	H	B	B	B	B	B	B	B	B	H	B	B	B	B	B	B	B	B	B	B	B	B	B	B	B	B	B	B	H	B	B	U	B
be_G_A_chr6_6112037	6	6112037	+	A/G	H	H	B	A	B	U	B	B	B	B	B	B	B	B	B	A	B	B	B	B	B	B	B	U	B	H	A	H	B	B	B	B	H	B	B	H	B	B	B	H	H	B	B	H	B
be_G_A_chr6_655794	6	655794	+	A/G	A	A	B	B	A	H	B	H	A	B	A	H	H	A	B	A	A	B	A	B	U	H	B	A	H	A	B	H	B	B	H	B	B	A	A	B	B	B	B	B	B	U	H	B	H
be_G_A_chr6_8006703	6	8006703	+	A/G	H	H	B	B	B	B	B	B	B	B	B	B	H	B	B	H	B	U	B	B	B	H	B	H	B	H	H	B	B	H	B	B	B	B	B	H	B	B	B	H	H	B	B	H	B
be_G_A_chr7_11480332	7	11480332	-	T/C	H	B	B	H	B	H	B	B	B	B	B	B	B	B	B	A	B	B	B	B	B	H	B	B	B	B	B	H	B	H	B	B	H	B	B	H	B	B	B	H	B	B	B	H	B
be_G_A_chr7_15456294	7	15456294	-	T/C	B	B	B	B	B	B	B	B	B	B	B	B	B	B	B	B	B	B	B	B	B	H	B	B	B	B	B	B	B	B	B	B	B	B	B	B	B	B	B	B	B	B	B	B	B
be_G_A_chr7_7587325	7	7587325	+	A/G	B	B	B	H	B	H	B	B	B	B	B	B	B	B	B	H	B	B	B	B	B	B	B	B	B	B	B	H	B	B	B	B	A	B	B	B	B	B	H	B	H	B	B	B	H
be_G_A_chr7_8123695	7	8123695	+	A/G	B	B	B	B	B	A	B	B	B	B	B	B	H	B	B	H	B	B	B	B	B	H	B	B	B	B	H	B	B	B	B	B	H	B	B	H	B	B	B	H	H	B	B	B	H
be_G_A_chr7_9037064	7	9037064	+	A/G	B	B	B	B	B	B	B	B	B	B	B	B	H	B	B	B	B	B	B	B	B	B	H	B	B	B	B	B	H	B	B	B	B	B	B	H	B	B	H	H	B	B	B	B	B
be_G_A_chr7_9544051	7	9544051	+	A/G	B	B	B	B	B	B	B	B	B	B	B	H	B	B	B	B	B	B	B	B	B	B	B	B	B	B	B	B	B	B	B	B	B	B	B	B	B	B	B	B	B	B	B	B	B
be_G_A_chr7_random_1089874	7	1089874	+	A/G	B	H	B	B	B	B	B	B	B	H	B	B	B	B	B	B	B	H	B	B	B	B	B	U	B	H	H	B	B	B	B	B	B	B	B	B	B	B	B	B	B	B	B	B	H
be_G_A_chr7_random_653806	7	653806	-	T/C	A	H	H	B	H	U	H	B	H	H	A	B	B	U	B	B	B	B	U	A	U	A	B	H	B	H	H	H	H	B	U	B	B	B	H	A	B	H	B	A	B	B	H	H	H
be_G_A_chr8_10431638	8	10431638	+	A/G	H	B	B	H	B	H	B	H	H	B	B	B	H	B	H	H	B	B	B	B	H	B	B	B	H	B	B	B	H	H	B	H	H	B	B	B	A	B	H	B	B	H	B	A	B
be_G_A_chr8_11097928	8	11097928	+	A/G	B	B	B	B	B	B	B	B	B	H	B	B	B	B	B	B	B	B	B	H	B	H	B	B	B	B	H	B	B	B	B	B	B	B	B	H	B	B	B	H	B	B	B	B	B
be_G_A_chr8_1205536	8	1205536	-	T/C	B	B	B	B	B	A	B	B	B	B	B	B	H	B	B	B	B	B	B	B	B	B	B	B	B	B	H	B	B	B	B	B	B	B	B	H	B	B	B	H	B	B	B	B	B
be_G_A_chr8_13338171	8	13338171	-	T/C	H	H	B	H	B	B	B	B	B	B	B	B	B	B	B	B	B	A	B	B	B	H	B	B	B	B	H	H	B	H	B	B	H	H	H	H	B	B	H	H	H	B	H	B	B
be_G_A_chr8_19687500	8	19687500	-	T/C	B	B	B	B	B	B	B	B	B	B	B	B	B	B	B	H	B	A	B	B	B	B	B	B	B	B	A	H	B	B	B	B	B	B	H	B	B	B	B	A	B	B	B	B	B
be_G_A_chr8_7979050	8	7979050	-	T/C	B	B	B	H	H	B	H	H	H	H	H	H	U	H	B	B	H	B	H	H	H	H	H	H	H	H	H	H	U	B	H	B	B	H	B	H	H	H	B	H	H	H	H	B	H
be_G_A_chr9_17319485	9	17319485	+	A/G	B	B	H	H	H	H	H	B	H	H	H	H	B	U	B	H	U	H	H	H	A	U	H	H	U	H	H	B	H	U	A	H	H	B	H	H	B	B	U	H	B	H	H	B	H
be_G_A_chr9_20811156	9	20811156	+	A/G	B	H	B	H	B	B	B	B	B	B	B	B	H	B	B	B	B	B	B	B	H	H	B	B	H	B	H	B	U	B	B	B	B	B	U	H	H	U	U	H	H	B	H	U	B
be_G_A_chr9_6594944	9	6594944	+	A/G	B	B	H	A	H	H	H	B	B	B	B	B	H	B	B	H	H	H	B	B	B	B	B	B	B	H	H	H	B	B	B	B	A	B	B	H	B	B	B	H	H	H	B	B	H
be_G_A_chrUn_15094339	UN	15094339	-	T/C	H	B	B	B	B	U	B	B	B	B	B	B	H	B	B	A	B	H	B	B	H	H	B	B	H	B	H	H	B	B	B	B	B	H	A	H	B	B	B	H	H	B	B	B	B
be_G_A_chrUn_17254000	UN	17254000	-	T/C	B	B	B	A	B	B	B	B	B	U	B	B	B	B	B	B	B	H	B	B	B	B	B	B	B	B	B	H	B	H	B	B	A	B	B	B	B	B	H	B	B	B	B	B	B
be_G_A_chrUn_18660444	UN	18660444	+	A/G	A	U	H	A	A	U	B	U	A	B	A	U	H	A	B	H	A	H	A	H	A	U	A	H	A	H	H	U	H	A	A	B	A	A	A	H	H	H	U	U	A	A	A	H	H
be_G_A_chrUn_19191104	UN	19191104	-	T/C	B	H	B	B	B	B	B	B	B	B	B	B	B	B	B	B	B	B	B	B	B	B	B	B	B	B	H	B	B	H	B	B	B	B	B	H	B	B	H	B	B	B	B	B	B
be_G_A_chrUn_24313551	UN	24313551	-	T/C	H	H	U	H	H	H	H	H	U	H	B	H	H	B	H	H	B	U	H	U	H	U	B	H	B	H	U	H	H	B	U	H	H	B	B	U	U	H	H	U	H	H	H	B	B
be_G_A_chrUn_25320760	UN	25320760	+	A/G	H	H	H	H	H	H	H	H	H	H	H	H	H	H	B	H	H	B	H	H	H	H	H	H	H	H	H	H	B	H	H	B	H	H	H	H	H	H	H	H	H	H	H	H	H
be_G_A_chrUn_37529357	UN	37529357	-	T/C	H	B	H	B	H	H	B	B	H	B	H	H	B	H	B	B	A	B	B	B	A	H	B	H	A	H	B	B	B	B	A	B	B	H	B	B	H	B	B	B	B	B	H	B	H
be_G_A_chrUn_40206171	UN	40206171	+	A/G	B	B	B	H	B	H	B	B	B	B	B	B	B	B	B	B	B	B	B	B	B	B	B	B	B	B	B	H	B	H	B	B	H	B	B	B	B	B	H	B	B	H	B	B	B
be_G_A_chrUn_42099601	UN	42099601	-	T/C	B	B	B	H	B	H	B	B	B	B	B	B	B	B	B	H	B	H	B	B	B	B	B	B	B	B	A	B	B	B	B	B	H	B	B	A	B	B	B	A	B	B	B	B	B
be_G_T_chr1_9566010	1	9566010	+	A/C	B	B	H	H	B	U	B	B	B	H	B	B	H	B	B	H	B	B	B	B	B	B	B	U	B	H	A	H	B	B	B	B	H	B	B	H	B	H	B	A	B	B	B	B	H
be_G_T_chr10_12018956	10	12018956	+	A/C	B	B	B	B	B	B	B	B	B	B	B	B	B	B	B	A	B	B	B	B	B	B	B	B	B	B	B	B	B	B	B	U	H	B	B	H	B	B	B	H	B	B	B	B	B
be_G_T_chr11_8876451	11	8876451	+	A/C	B	H	B	H	B	B	H	B	B	H	U	B	H	B	U	A	B	B	B	B	B	H	B	U	B	H	H	H	B	B	B	U	H	B	B	H	B	B	B	H	H	B	B	A	B
be_G_T_chr13_22098507	13	22098507	-	T/G	A	H	B	A	A	B	B	B	U	B	A	H	U	A	U	B	A	H	H	B	B	A	B	A	B	H	B	B	B	A	A	B	H	A	A	B	A	B	B	B	H	A	A	H	A
be_G_T_chr15_19410288	15	19410288	+	A/C	B	H	H	B	B	H	B	B	B	H	H	H	H	H	B	B	H	H	H	B	H	H	B	H	H	B	H	B	H	H	B	B	B	H	H	B	H	H	B	H	B	H	H	B	B
be_G_T_chr16_7629637	16	7629637	+	A/C	B	B	H	B	H	U	H	H	B	B	B	B	B	B	B	B	B	B	B	H	B	B	H	U	H	B	H	H	B	H	B	B	B	H	B	H	B	H	U	H	B	B	B	H	H
be_G_T_chr17_13473573	17	13473573	-	T/G	B	B	B	B	B	B	B	B	B	B	B	B	H	B	B	B	B	A	B	B	B	B	B	B	B	B	B	B	B	H	B	B	B	B	H	B	B	B	B	B	B	B	B	B	B
be_G_T_chr17_6611850	17	6611850	+	A/C	H	H	H	B	B	B	B	B	B	H	B	B	H	B	B	B	B	B	B	B	B	B	B	B	B	B	B	B	H	B	B	B	B	B	B	B	B	B	B	B	B	B	B	H	H
be_G_T_chr17_8556059	17	8556059	-	T/G	H	H	H	B	H	B	H	B	B	H	H	B	B	B	B	B	B	H	B	B	B	B	B	U	B	B	B	H	B	B	B	B	B	H	B	B	B	H	B	H	B	H	B	H	H
be_G_T_chr19_7123197	19	7123197	-	T/G	B	B	B	H	H	H	B	B	B	B	B	B	B	B	B	B	B	B	B	B	B	B	B	H	B	A	B	B	H	B	B	B	B	B	B	B	B	B	B	B	B	B	B	B	A
be_G_T_chr2_3200857	2	3200857	-	T/G	H	B	B	A	B	H	B	B	B	B	B	B	B	B	B	A	B	B	B	B	B	B	B	U	B	B	B	B	B	B	B	B	H	B	B	B	B	B	B	H	H	B	B	H	B
be_G_T_chr2_4192333	2	4192333	-	T/G	B	H	B	B	B	H	B	B	B	H	B	B	B	B	B	A	B	B	B	B	B	H	B	U	B	H	H	B	B	B	B	B	B	B	B	H	B	B	B	H	B	B	B	B	H
be_G_T_chr3_2129384	3	2129384	-	T/G	B	B	B	H	H	H	B	B	B	H	B	H	B	B	B	A	B	B	B	A	B	B	A	B	H	H	H	H	B	B	B	B	H	B	B	H	B	A	B	H	H	H	B	B	H
be_G_T_chr3_3594457	3	3594457	-	T/G	B	H	B	B	B	B	B	B	B	B	B	B	B	H	B	B	H	H	B	B	H	B	B	H	H	B	H	H	B	H	B	B	B	B	B	H	B	B	B	H	B	B	B	B	B
be_G_T_chr4_11758311	4	11758311	+	A/C	H	H	H	B	B	H	B	B	B	B	B	H	H	B	B	U	B	B	B	B	B	H	B	B	B	B	H	H	B	H	B	B	B	B	B	H	B	B	H	H	H	B	B	H	B
be_G_T_chr4_20506572	4	20506572	+	A/C	H	A	H	B	H	B	B	H	A	H	A	H	B	B	B	B	A	A	A	B	H	H	B	H	A	H	H	H	B	H	H	B	B	A	H	H	B	B	B	H	B	B	H	B	A
be_G_T_chr5_21127783	5	21127783	-	T/G	B	H	B	H	B	B	B	B	B	H	B	B	H	B	B	B	B	B	B	B	B	B	B	U	B	H	B	B	B	B	B	B	H	B	B	B	B	B	B	B	H	B	B	B	B
be_G_T_chr5_24532383	5	24532383	+	A/C	H	H	A	B	H	B	B	H	A	A	A	A	H	A	A	B	A	B	A	A	A	A	A	H	H	H	B	H	B	H	A	B	B	A	H	B	H	A	H	B	H	H	A	H	A
be_G_T_chr6_4154416	6	4154416	-	T/G	H	B	B	B	B	B	B	B	B	B	B	B	B	B	B	B	B	B	B	B	B	B	B	B	B	B	H	H	B	H	B	B	B	B	B	H	B	B	H	H	B	B	B	H	B
be_G_T_chr7_17831212	7	17831212	-	T/G	B	B	B	B	B	B	B	B	B	B	B	B	B	B	B	B	B	B	B	B	B	B	B	B	B	B	B	B	B	H	B	B	B	B	B	B	B	B	H	B	H	B	B	B	B
be_G_T_chr8_20722390	8	20722390	-	T/G	B	B	B	H	B	A	B	B	B	B	B	B	B	B	B	H	B	B	B	B	B	B	B	B	B	B	B	B	B	B	B	B	H	B	B	B	B	B	B	B	B	B	B	B	B
be_G_T_chr8_8512750	8	8512750	+	A/C	B	B	H	H	H	A	U	H	B	B	B	A	B	B	B	B	H	H	H	B	B	B	H	H	B	B	B	B	H	B	B	B	H	B	A	B	B	H	B	B	B	B	B	B	B
be_G_T_chr9_11057482	9	11057482	+	A/C	B	B	B	B	B	B	H	B	B	B	B	B	B	B	B	U	B	B	B	B	B	B	B	B	B	B	B	B	H	B	B	B	B	B	B	H	B	B	B	H	B	B	B	B	B
be_G_T_chr9_3187077	9	3187077	-	T/G	B	B	B	B	B	H	B	B	B	B	B	B	B	B	B	B	B	B	B	B	B	B	B	B	B	B	H	B	B	B	B	B	B	B	B	H	B	B	B	H	B	B	B	B	B
be_G_T_chrUn_12005368	UN	12005368	-	T/G	B	B	B	B	B	B	B	B	B	B	B	B	B	B	B	H	B	B	B	B	B	B	B	B	B	B	A	H	B	B	B	B	B	B	B	A	B	B	B	H	B	B	B	B	B
be_G_T_chrUn_22782497	UN	22782497	-	T/G	B	H	B	H	B	H	B	B	B	H	B	B	H	B	B	H	B	B	B	B	B	H	B	U	B	H	H	B	B	H	B	B	H	B	B	H	B	B	H	H	H	B	B	B	B
be_T_C_chr1_16502631	1	16502631	+	A/G	H	H	H	H	H	H	H	H	H	H	H	H	H	H	A	H	H	H	H	H	H	H	H	H	H	H	U	H	A	H	H	U	H	H	A	H	H	H	H	H	H	H	H	H	H
be_T_C_chr1_16901696	1	16901696	-	T/C	B	B	A	B	B	H	H	H	A	H	H	H	A	H	A	B	B	A	H	B	B	H	H	A	B	H	A	B	H	H	B	A	B	H	H	A	H	B	A	A	B	B	B	H	H
be_T_C_chr1_8114109	1	8114109	-	T/C	A	A	A	U	H	H	H	A	A	A	U	A	A	H	A	A	H	H	A	H	H	H	A	H	A	H	U	H	A	A	A	A	U	H	A	H	A	A	H	H	A	A	A	H	U
be_T_C_chr10_2340321	10	2340321	+	A/G	A	A	A	A	A	H	H	A	A	A	A	A	H	A	A	B	A	A	A	A	A	A	A	A	A	A	A	H	A	H	A	A	H	A	A	A	A	A	H	H	A	A	A	A	A
be_T_C_chr11_17108623	11	17108623	+	A/G	A	B	A	B	A	H	A	A	A	A	A	A	H	A	A	A	A	A	A	A	A	A	A	A	A	A	A	A	A	A	U	A	B	A	A	H	A	A	A	A	B	A	A	A	A
be_T_C_chr11_18012075	11	18012075	+	A/G	B	B	A	B	B	B	H	B	A	A	U	A	H	A	B	B	A	H	A	A	U	B	B	A	A	A	H	A	B	A	A	B	B	A	A	H	B	B	H	H	B	B	A	B	A
be_T_C_chr12_10329505	12	10329505	-	T/C	H	H	H	H	H	A	A	H	H	H	H	H	A	H	A	H	H	H	H	H	H	H	H	H	H	H	H	H	H	H	H	A	H	H	H	H	H	H	H	H	H	H	H	H	A
be_T_C_chr12_11860915	12	11860915	+	A/G	A	A	A	H	A	A	A	A	A	A	A	A	A	A	A	A	A	A	A	A	H	A	A	A	A	A	A	A	A	A	A	A	H	A	A	A	A	A	A	A	A	A	A	A	A
be_T_C_chr12_13725553	12	13725553	+	A/G	A	H	H	A	A	A	A	A	A	A	H	A	A	H	A	A	A	A	A	A	A	A	A	U	A	H	A	A	A	A	H	A	A	A	A	A	A	A	A	H	H	A	A	A	H
be_T_C_chr12_16603554	12	16603554	+	A/G	H	H	H	H	H	H	H	H	U	H	U	H	H	H	B	H	H	H	H	U	U	H	B	H	B	H	H	H	U	H	H	B	H	H	H	H	H	H	H	H	U	B	U	H	H
be_T_C_chr12_1690195	12	1690195	-	T/C	A	A	A	A	A	A	A	A	A	A	A	A	A	A	A	A	A	A	A	A	A	A	A	A	A	A	A	H	A	A	A	A	A	A	A	A	A	A	A	A	A	A	A	H	A
be_T_C_chr12_19506516	12	19506516	-	T/C	H	H	H	B	B	H	H	H	H	A	A	A	B	B	A	A	B	A	A	H	H	H	H	H	B	H	H	H	H	H	H	H	H	B	H	H	A	B	A	H	H	H	B	A	H
be_T_C_chr12_20956310	12	20956310	-	T/C	H	H	A	A	A	H	A	A	H	H	A	H	H	A	A	H	H	H	A	A	A	U	B	U	A	H	B	A	A	H	H	A	A	A	A	B	A	A	A	H	A	H	H	A	H
be_T_C_chr12_3124292	12	3124292	-	T/C	A	A	A	A	A	A	A	A	A	H	A	A	A	A	A	H	A	A	A	A	A	A	A	A	A	A	A	A	H	A	A	A	A	A	A	A	H	A	A	A	A	A	A	A	A
be_T_C_chr12_4012997	12	4012997	+	A/G	A	H	A	A	A	A	A	A	A	H	A	A	A	A	A	A	A	A	A	A	A	A	A	A	A	H	A	A	A	A	A	A	A	A	A	A	A	A	A	A	H	A	A	A	H
be_T_C_chr12_6946212	12	6946212	-	T/C	A	H	H	A	A	A	A	A	A	A	A	A	H	A	A	H	A	A	A	A	A	H	A	A	A	H	A	A	H	H	A	A	A	A	A	A	A	A	H	A	H	A	A	A	H
be_T_C_chr12_766918	12	766918	-	T/C	H	H	H	H	H	H	H	U	H	H	H	H	A	H	H	U	H	U	H	A	U	H	A	H	A	H	H	H	A	H	H	U	H	H	H	A	H	A	A	A	H	H	H	A	H
be_T_C_chr13_16289730	13	16289730	-	T/C	H	H	H	H	H	H	H	H	H	H	H	H	H	H	A	H	H	H	H	H	H	H	H	H	H	H	H	H	A	H	H	A	H	H	H	H	A	A	H	H	H	H	H	H	H
be_T_C_chr13_18254139	13	18254139	-	T/C	A	A	A	A	A	A	A	A	A	A	A	H	A	A	A	A	A	A	A	A	A	A	A	A	H	A	A	H	A	A	A	A	A	H	A	A	A	A	A	A	A	A	A	A	A
be_T_C_chr13_24078201	13	24078201	+	A/G	A	A	A	A	A	H	A	A	A	A	A	A	A	A	A	A	A	A	A	A	A	A	A	A	A	A	A	A	A	A	A	A	A	A	A	A	A	A	A	A	A	H	A	A	A
be_T_C_chr13_random_1436910	13	1436910	-	T/C	H	A	A	H	A	A	A	A	H	A	H	A	A	A	A	A	A	A	A	H	A	A	A	A	A	A	A	A	A	A	A	A	A	A	A	A	A	A	A	A	A	A	A	A	A
be_T_C_chr13_random_2442030	13	2442030	-	T/C	B	H	H	B	H	H	H	H	A	H	H	H	H	B	A	B	B	B	A	H	B	B	B	H	H	B	B	B	H	B	B	A	B	B	B	B	A	A	H	B	B	B	B	H	B
be_T_C_chr14_21224860	14	21224860	-	T/C	A	A	A	A	A	A	A	A	A	H	A	A	A	A	A	U	A	A	A	A	A	A	A	A	A	A	A	H	A	A	A	A	A	A	A	A	A	A	A	A	A	A	A	A	A
be_T_C_chr14_26090212	14	26090212	-	T/C	H	A	A	A	A	H	A	A	A	H	A	A	A	A	A	H	A	A	A	A	A	H	A	H	A	A	A	A	A	H	A	A	H	A	A	A	A	A	H	A	A	A	A	H	A
be_T_C_chr14_2714511	14	2714511	-	T/C	U	H	A	H	H	U	A	A	H	H	U	A	A	A	A	U	H	U	U	A	U	A	H	A	U	H	A	H	A	A	H	A	A	H	A	A	A	H	A	A	A	H	H	A	H
be_T_C_chr14_28043506	14	28043506	+	A/G	H	A	A	A	A	A	A	A	A	A	A	A	H	A	A	A	A	A	A	A	A	H	A	A	A	A	H	A	A	A	A	A	A	A	A	H	A	A	A	H	A	A	A	H	A
be_T_C_chr14_7569305	14	7569305	-	T/C	A	H	A	H	H	H	A	A	A	A	A	H	A	A	A	A	H	H	A	H	A	H	A	A	A	H	H	A	A	A	A	A	H	H	H	A	A	H	A	A	H	A	A	A	A
be_T_C_chr15_13511998	15	13511998	-	T/C	A	A	A	A	A	A	A	A	A	A	A	A	A	A	A	A	A	A	A	A	A	A	A	A	A	H	A	A	A	A	A	A	A	A	A	A	A	A	A	A	A	A	A	A	A
be_T_C_chr15_15472802	15	15472802	-	T/C	A	A	A	A	A	A	A	A	A	A	A	A	A	A	A	A	A	B	A	A	A	H	A	H	A	A	A	A	A	A	A	A	A	A	H	A	A	A	A	A	A	A	A	A	A
be_T_C_chr15_16955824	15	16955824	-	T/C	A	A	A	A	A	A	A	A	A	A	A	A	A	A	A	B	A	A	A	A	A	A	A	A	A	A	A	A	A	A	A	A	A	A	A	A	A	A	A	A	A	A	A	A	A
be_T_C_chr15_701609	15	701609	+	A/G	A	H	H	A	U	A	U	A	A	A	A	A	A	A	U	A	A	A	A	A	A	A	A	A	A	H	B	B	U	H	A	A	H	A	A	B	A	A	H	H	H	H	A	A	A
be_T_C_chr16_17907100	16	17907100	+	A/G	H	A	A	H	H	A	H	H	H	H	H	A	A	A	A	H	A	A	H	A	H	H	H	A	A	A	H	H	A	A	A	A	H	H	H	A	A	H	A	A	A	A	H	A	A
be_T_C_chr16_6117007	16	6117007	-	T/C	A	A	A	A	A	A	A	A	A	A	A	H	A	H	H	A	A	A	A	B	A	A	B	H	A	A	A	A	A	A	A	A	A	H	A	A	A	B	H	A	A	A	A	A	A
be_T_C_chr16_9567682	16	9567682	+	A/G	A	A	A	A	H	U	A	A	U	H	A	H	A	A	A	H	H	A	A	A	A	U	H	A	A	H	A	H	A	B	H	A	H	A	A	A	A	H	A	A	A	A	H	A	A
be_T_C_chr17_1740690	17	1740690	+	A/G	A	A	A	H	A	U	A	A	A	B	A	A	A	A	A	H	A	A	A	A	A	H	A	H	A	H	H	A	A	A	A	A	H	A	A	H	A	A	A	B	H	A	A	A	H
be_T_C_chr17_5130090	17	5130090	-	T/C	A	A	A	A	A	A	A	A	A	H	A	H	H	A	A	A	A	A	A	A	A	H	A	H	A	A	A	H	A	A	A	A	A	A	A	A	A	A	A	H	A	A	A	A	A
be_T_C_chr17_7602929	17	7602929	-	T/C	H	A	A	B	A	U	A	A	A	A	A	A	H	A	A	B	A	A	A	A	A	A	A	A	A	H	A	A	A	H	A	A	H	A	A	A	A	A	A	A	H	A	A	H	A
be_T_C_chr17_9957295	17	9957295	+	A/G	H	A	A	B	A	A	H	A	A	H	A	H	A	A	A	A	A	A	A	A	A	H	A	U	A	H	A	A	A	A	A	A	H	A	A	H	A	A	A	H	H	H	A	H	A
be_T_C_chr18_12461028	18	12461028	-	T/C	A	H	A	A	A	A	A	A	A	H	A	A	A	A	A	H	A	A	A	A	A	A	A	U	A	H	A	H	A	A	A	A	A	A	A	A	A	A	A	A	A	A	A	A	H
be_T_C_chr18_21261386	18	21261386	+	A/G	A	A	A	A	A	A	A	A	A	A	A	A	H	A	A	A	A	A	A	A	A	A	A	A	A	A	A	A	A	A	A	A	A	A	A	A	A	A	A	A	H	A	A	A	A
be_T_C_chr18_247971	18	247971	+	A/G	A	A	A	A	A	A	A	A	A	A	A	A	A	A	A	A	A	A	A	A	A	A	A	A	A	A	A	A	A	A	A	A	A	A	A	A	A	A	A	A	A	A	A	H	A
be_T_C_chr18_25171363	18	25171363	+	A/G	A	A	A	A	A	A	A	A	A	A	A	A	A	A	A	A	A	A	A	A	A	A	A	A	A	A	A	A	A	H	A	A	A	A	A	A	A	A	A	A	A	A	A	A	A
be_T_C_chr18_26620708	18	26620708	+	A/G	A	H	A	A	A	A	A	A	H	H	H	H	A	A	A	H	A	A	A	H	H	H	A	U	H	H	A	A	A	A	A	A	A	H	A	A	A	A	A	A	A	H	A	A	H
be_T_C_chr18_28099335	18	28099335	+	A/G	H	H	A	H	H	H	A	H	H	H	U	H	H	H	A	H	H	U	H	H	H	H	H	H	H	H	H	H	A	H	H	A	H	B	H	H	H	H	H	A	A	U	A	H	H
be_T_C_chr18_3680774	18	3680774	-	T/C	A	H	A	A	A	A	A	A	A	A	A	A	H	A	A	A	A	A	A	A	A	A	A	H	A	H	H	A	A	H	A	A	A	A	A	H	A	A	H	H	H	A	A	A	H
be_T_C_chr18_8051696	18	8051696	-	T/C	A	A	A	A	A	A	A	A	A	A	A	H	A	A	U	H	A	A	A	A	A	A	A	A	A	A	U	A	A	A	A	A	A	A	H	A	U	A	A	A	A	A	A	H	A
be_T_C_chr18_random_1681718	18	1681718	-	T/C	A	A	A	A	A	A	A	A	A	A	A	A	A	A	A	A	A	H	A	A	A	H	A	A	A	A	H	H	A	A	A	A	A	A	H	H	A	A	H	H	H	A	A	H	A
be_T_C_chr18_random_2803874	18	2803874	-	T/C	H	H	A	H	H	H	H	H	H	H	H	H	U	H	A	U	A	A	H	A	H	H	H	H	H	H	U	H	H	H	H	A	H	H	H	H	H	A	H	U	H	H	H	H	H
be_T_C_chr18_random_292619	18	292619	-	T/C	A	A	A	A	A	A	A	A	A	A	A	A	A	A	A	A	A	A	A	A	A	H	A	A	A	A	H	H	A	A	A	A	A	A	A	H	A	A	H	H	A	H	A	H	A
be_T_C_chr19_1100946	19	1100946	-	T/C	B	B	A	B	B	U	A	U	A	B	B	B	H	B	A	B	B	B	B	H	B	B	A	B	A	B	H	H	B	B	B	A	B	A	B	H	H	H	A	B	B	B	B	B	B
be_T_C_chr19_16413979	19	16413979	+	A/G	H	H	H	H	A	A	A	A	H	H	A	A	H	H	A	H	U	H	U	A	H	H	U	H	A	H	U	H	A	H	H	A	A	A	A	A	A	A	A	A	H	A	H	A	H
be_T_C_chr19_18381649	19	18381649	+	A/G	H	B	H	B	U	A	A	U	B	B	B	B	A	B	A	A	B	H	B	B	B	H	B	H	B	B	A	B	A	H	B	A	A	B	H	B	H	B	A	H	H	H	B	A	B
be_T_C_chr19_19299566	19	19299566	+	A/G	A	A	A	A	A	A	A	A	A	A	A	A	H	A	A	A	A	A	A	A	A	A	A	A	A	A	A	A	A	A	A	A	H	A	A	A	A	A	A	A	H	A	A	H	A
be_T_C_chr2_1227207	2	1227207	+	A/G	B	H	H	B	B	H	H	H	B	H	B	B	H	B	A	A	B	B	B	B	B	B	B	H	B	H	B	B	H	B	B	A	B	B	B	B	H	B	H	B	B	B	B	H	H
be_T_C_chr2_12563129	2	12563129	+	A/G	A	A	A	A	A	H	A	U	A	H	A	H	A	A	A	A	A	H	A	H	A	H	H	U	A	A	H	H	A	H	A	A	A	A	H	H	A	U	H	H	H	A	A	A	H
be_T_C_chr2_16538398	2	16538398	+	A/G	A	H	A	A	A	A	A	A	A	A	A	A	A	A	A	A	A	A	A	A	A	A	A	H	A	H	A	H	A	A	A	A	A	A	A	A	A	A	A	A	A	A	A	A	H
be_T_C_chr2_6657580	2	6657580	-	T/C	A	H	A	A	A	A	A	A	A	H	A	A	A	A	A	A	A	A	A	A	A	H	A	H	A	H	A	A	A	A	A	A	A	A	A	A	A	A	A	A	A	A	A	A	H
be_T_C_chr2_9145821	2	9145821	+	A/G	A	H	A	A	A	A	A	A	A	A	A	H	A	A	A	A	A	A	A	A	A	A	A	H	A	H	A	A	A	A	A	A	A	A	A	A	A	A	A	A	A	A	A	A	H
be_T_C_chr3_1682509	3	1682509	+	A/G	A	H	A	A	A	A	A	A	A	A	A	A	H	A	A	A	A	A	A	A	A	A	A	A	A	A	A	A	A	H	A	A	A	A	A	A	A	A	H	A	A	A	A	A	A
be_T_C_chr3_18441972	3	18441972	+	A/G	H	H	H	H	H	A	A	H	H	H	H	H	H	H	H	H	H	A	H	H	H	H	A	H	H	H	A	H	H	H	H	A	H	H	H	A	A	A	A	A	H	H	H	H	A
be_T_C_chr3_3110337	3	3110337	-	T/C	A	A	A	A	A	A	A	A	A	B	U	A	A	A	A	A	A	A	A	U	A	A	U	A	A	B	H	A	A	B	U	A	H	A	A	H	A	A	A	H	H	A	A	H	B
be_T_C_chr3_6004158	3	6004158	+	A/G	A	H	A	A	A	A	A	A	A	A	A	A	A	A	A	A	A	A	A	A	A	A	A	A	A	A	A	A	A	A	A	A	A	A	A	A	A	A	A	A	A	A	A	H	A
be_T_C_chr3_8876215	3	8876215	-	T/C	H	H	H	H	H	H	H	H	H	H	H	H	H	H	A	U	H	H	H	H	H	H	H	H	H	H	A	H	H	H	H	A	H	H	H	A	H	H	A	A	H	U	H	H	H
be_T_C_chr3_9340434	3	9340434	-	T/C	H	H	A	H	A	H	H	A	A	A	U	A	H	A	A	H	A	H	A	A	A	H	A	H	A	H	A	H	A	A	A	A	H	A	A	A	A	A	H	A	H	A	A	H	H
be_T_C_chr4_15130094	4	15130094	-	T/C	H	H	A	A	A	A	A	H	H	A	A	H	H	H	A	U	A	H	A	U	H	H	U	A	A	A	H	H	A	H	H	A	A	H	H	A	H	A	H	H	A	H	H	H	U
be_T_C_chr4_19136673	4	19136673	+	A/G	H	A	A	A	A	A	A	A	A	A	A	A	A	A	A	A	A	A	A	A	A	A	A	A	A	A	A	H	A	H	A	A	A	A	A	A	H	A	B	A	A	A	A	U	A
be_T_C_chr4_6544365	4	6544365	+	A/G	A	A	A	H	A	H	A	A	A	A	A	A	H	A	A	H	A	A	A	A	A	A	A	A	A	A	A	H	H	A	A	A	H	A	H	H	A	A	A	H	A	A	A	A	A
be_T_C_chr5_14802099	5	14802099	+	A/G	A	A	A	B	A	U	A	A	A	A	A	A	H	A	A	B	A	A	A	A	A	A	A	A	A	A	H	H	A	A	A	A	B	A	A	H	A	A	A	H	A	A	A	A	A
be_T_C_chr5_22585430	5	22585430	+	A/G	A	A	A	A	H	A	H	A	H	A	H	H	A	H	A	A	A	B	A	B	A	H	A	H	A	A	A	H	H	A	H	A	A	H	H	A	A	A	A	A	A	H	A	A	A
be_T_C_chr5_3155889	5	3155889	+	A/G	H	A	A	B	A	B	A	A	A	H	A	A	A	A	A	A	A	A	A	A	A	A	A	A	A	A	H	H	A	A	A	A	H	A	A	H	A	A	H	H	H	A	A	H	A
be_T_C_chr5_7062255	5	7062255	+	A/G	A	A	A	H	U	B	A	A	A	A	A	A	B	A	A	A	A	A	A	A	A	A	A	A	A	A	A	H	U	H	A	U	U	A	A	A	A	A	A	A	A	A	A	A	A
be_T_C_chr5_random_80485	5	80485	+	A/G	A	H	A	A	A	A	A	U	A	H	A	A	A	A	A	A	A	A	A	A	A	H	A	A	A	H	H	H	A	A	A	A	A	A	A	B	A	A	A	H	A	H	A	A	H
be_T_C_chr6_11472728	6	11472728	+	A/G	H	H	A	H	A	H	A	H	A	A	A	A	H	A	A	H	A	A	U	A	A	H	A	A	A	A	H	H	A	H	A	A	H	A	A	H	U	A	H	H	U	A	A	H	A
be_T_C_chr6_18294203	6	18294203	+	A/G	A	A	A	A	A	A	A	A	A	A	A	A	A	A	A	H	A	A	A	A	A	A	A	H	A	H	A	A	A	A	A	A	A	A	A	A	A	A	A	A	A	A	A	A	A
be_T_C_chr6_2077660	6	2077660	+	A/G	A	H	A	H	A	B	A	A	A	A	A	A	A	A	A	A	A	H	A	A	A	A	A	A	A	H	H	H	A	H	A	A	H	A	H	A	A	A	H	H	A	A	A	A	A
be_T_C_chr7_14910809	7	14910809	-	T/C	H	A	A	A	A	A	A	A	A	A	A	A	A	A	A	A	A	A	A	A	A	H	A	A	A	A	A	H	A	A	A	A	A	A	A	A	A	A	A	A	A	A	A	H	A
be_T_C_chr7_15847610	7	15847610	+	A/G	A	A	A	A	A	H	A	A	A	A	A	A	H	A	A	A	A	A	A	A	A	A	A	A	A	A	H	A	A	A	A	A	A	A	A	H	A	A	A	H	H	A	A	A	A
be_T_C_chr7_16852397	7	16852397	-	T/C	A	A	A	H	A	A	A	A	A	A	U	A	A	A	A	A	A	A	A	A	A	H	A	A	A	A	A	A	A	A	A	A	H	A	A	A	A	A	A	A	H	A	A	A	A
be_T_C_chr8_10932715	8	10932715	-	T/C	A	A	A	H	H	U	H	A	A	A	A	H	H	A	A	B	A	B	A	A	A	A	A	A	A	A	B	H	H	A	A	A	B	A	H	B	A	A	A	B	H	A	A	A	A
be_T_C_chr8_18183815	8	18183815	+	A/G	H	A	A	A	A	U	A	A	A	H	A	A	A	A	A	H	A	A	A	A	A	H	A	H	A	H	B	H	A	H	A	A	H	A	A	B	A	A	H	B	H	A	A	H	H
be_T_C_chr8_18696002	8	18696002	-	T/C	H	H	H	H	H	H	H	U	H	H	H	H	H	H	A	H	H	H	B	H	H	H	U	H	H	H	H	H	H	H	H	U	H	H	H	H	U	H	H	H	H	H	H	H	H
be_T_C_chr9_12949797	9	12949797	+	A/G	H	A	A	A	A	A	A	A	A	A	A	A	A	A	A	A	A	A	A	A	A	A	A	A	A	A	H	H	A	A	A	A	A	A	H	A	A	A	A	A	A	A	A	H	A
be_T_C_chr9_14306927	9	14306927	-	T/C	A	H	A	H	A	A	A	A	A	A	H	A	A	A	A	A	A	A	H	A	H	A	A	A	A	A	A	A	A	H	A	A	A	A	A	A	A	A	A	A	H	A	H	A	A
be_T_C_chr9_16821808	9	16821808	+	A/G	A	A	A	A	A	A	A	H	A	A	A	A	A	A	A	H	A	H	H	H	A	A	A	H	A	A	A	A	A	A	A	A	A	A	A	A	A	A	A	A	A	A	A	A	A
be_T_C_chr9_22719496	9	22719496	+	A/G	H	H	A	H	A	U	U	A	A	H	A	A	H	A	A	H	A	H	A	A	A	A	A	A	A	H	U	H	A	H	A	A	H	A	A	H	A	A	H	U	H	A	A	H	H
be_T_C_chr9_2690418	9	2690418	-	T/C	H	A	A	A	A	U	A	A	A	A	A	A	U	A	A	A	A	A	A	A	A	A	A	A	A	A	A	A	A	H	A	A	A	A	A	A	A	A	U	A	A	A	A	H	A
be_T_C_chr9_3647985	9	3647985	+	A/G	A	H	A	A	H	H	A	A	A	H	A	H	A	H	A	A	A	H	H	A	H	A	A	U	H	A	B	H	H	A	H	A	A	H	A	B	A	A	A	B	A	H	H	A	A
be_T_C_chr9_6085401	9	6085401	-	T/C	B	B	H	H	B	H	H	H	H	H	B	H	B	B	H	B	H	H	H	H	B	H	H	H	H	U	H	H	B	H	H	B	H	H	B	H	B	B	H	H	U	H	H	B	H
be_T_C_chr9_7094591	9	7094591	-	T/C	A	H	A	A	H	A	A	A	A	A	A	H	B	A	A	A	A	H	H	A	A	A	A	A	A	A	A	A	A	H	A	A	A	A	A	A	A	A	A	A	H	H	H	A	A
be_T_C_chr9_741107	9	741107	-	T/C	H	A	H	H	A	A	A	A	A	A	A	H	A	A	A	A	A	H	A	A	A	H	A	H	A	A	A	H	A	H	A	A	A	A	A	A	A	A	H	A	H	A	A	H	H
be_T_C_chr9_7572193	9	7572193	+	A/G	B	H	B	B	B	U	B	A	H	A	H	B	B	A	B	H	H	H	H	H	A	B	B	H	H	B	A	H	B	H	H	B	B	A	H	H	H	B	H	A	H	H	H	B	B
be_T_C_chr9_9534153	9	9534153	-	T/C	A	H	A	H	H	A	H	A	H	A	H	A	A	A	A	A	H	H	H	H	A	A	A	H	H	H	H	H	H	H	H	A	A	A	H	H	A	A	A	H	H	A	H	A	H
be_T_C_chrUn_11446632	UN	11446632	+	A/G	H	A	A	B	H	A	A	A	A	H	A	A	H	A	A	A	H	B	H	A	A	A	A	U	A	H	B	H	A	H	A	A	A	A	A	B	A	A	A	B	H	A	A	H	A
be_T_C_chrUn_12652458	UN	12652458	+	A/G	A	A	A	H	H	H	A	H	A	A	A	A	H	A	A	H	A	A	A	A	A	H	A	A	A	H	H	H	A	H	A	A	H	A	A	H	A	U	H	H	A	U	A	H	A
be_T_C_chrUn_14126908	UN	14126908	-	T/C	A	H	A	B	H	B	H	H	H	H	H	H	H	B	A	B	A	H	A	A	B	H	A	H	A	A	A	A	H	A	A	A	B	H	H	A	A	H	H	A	B	B	H	A	A
be_T_C_chrUn_17645614	UN	17645614	-	T/C	A	A	A	A	A	A	A	A	A	H	A	A	A	A	A	A	A	A	A	A	A	A	A	H	A	A	A	A	A	A	A	A	A	A	A	A	A	A	A	A	A	A	A	A	A
be_T_C_chrUn_20219225	UN	20219225	+	A/G	H	B	B	H	H	B	B	H	B	H	B	B	H	B	H	B	B	H	B	B	B	H	B	H	H	H	H	H	H	H	B	U	B	H	H	H	B	B	H	H	H	H	B	H	B
be_T_C_chrUn_31438913	UN	31438913	-	T/C	A	A	A	A	A	A	A	A	A	A	A	A	A	A	A	A	A	A	A	A	A	A	A	A	A	A	A	H	A	A	A	A	A	A	A	A	A	A	A	A	A	A	A	A	A
be_T_C_chrUn_40840400	UN	40840400	+	A/G	A	A	A	A	A	A	A	A	A	A	A	A	A	A	A	A	A	A	A	A	A	U	A	A	A	A	H	A	A	U	A	A	A	A	A	H	A	A	U	H	A	A	A	A	A
be_T_C_chrUn_8844841	UN	8844841	+	A/G	H	A	H	A	A	U	A	A	H	A	A	H	A	A	H	B	A	H	A	H	H	A	A	H	A	A	A	A	A	A	H	A	A	A	A	A	H	H	A	A	A	A	A	A	A
be_T_C_chrUn_9472396	UN	9472396	-	T/C	H	H	H	H	H	H	H	H	H	H	H	H	H	H	A	H	H	H	H	H	H	H	H	H	H	H	H	H	H	H	H	A	H	H	H	H	A	H	H	H	H	H	H	H	H
be_T_G_chr1_13967545	1	13967545	+	A/C	H	A	A	A	A	A	A	A	A	H	A	A	A	A	A	A	A	A	A	A	A	H	A	A	A	A	H	A	A	A	A	A	A	A	A	H	A	A	A	H	A	A	A	H	A
be_T_G_chr1_2247383	1	2247383	-	T/G	A	A	H	A	A	A	A	A	A	A	A	A	H	A	A	A	A	A	A	A	A	A	A	H	A	H	A	A	A	H	A	A	A	A	A	A	A	A	H	A	H	A	A	A	A
be_T_G_chr10_12964305	10	12964305	-	T/G	A	H	H	B	H	B	H	H	H	H	H	H	H	H	A	H	B	B	B	H	H	B	H	H	A	H	H	H	H	B	B	H	H	B	H	H	H	B	B	H	H	B	B	H	B
be_T_G_chr11_1187950	11	1187950	+	A/C	A	A	A	H	A	H	A	A	A	A	A	H	A	A	A	H	A	A	A	A	A	H	A	A	A	A	A	A	A	A	A	A	H	A	A	A	A	A	A	A	A	A	A	H	A
be_T_G_chr11_713301	11	713301	-	T/G	A	H	A	H	A	H	A	A	A	H	A	A	A	A	A	A	A	A	A	A	A	A	A	A	A	A	H	A	A	A	A	A	A	A	A	H	A	A	A	H	H	A	A	A	A
be_T_G_chr11_8384606	11	8384606	-	T/G	A	A	A	A	U	A	A	A	A	H	A	A	A	A	A	A	A	A	A	A	A	A	A	H	U	A	H	H	A	H	A	A	A	A	A	H	A	A	H	H	A	A	A	A	A
be_T_G_chr14_4538626	14	4538626	+	A/C	A	H	H	H	A	H	H	A	A	A	A	A	H	A	A	H	A	H	A	A	A	H	A	H	A	H	H	H	H	H	A	A	H	A	H	H	A	A	H	H	H	A	A	H	H
be_T_G_chr14_7136442	14	7136442	-	T/G	A	H	A	A	A	U	A	H	A	H	A	A	H	A	A	H	A	A	A	A	A	A	A	H	H	H	A	H	H	A	A	H	A	H	H	H	H	A	H	B	H	A	A	H	A
be_T_G_chr16_1229416	16	1229416	+	A/C	B	B	H	B	B	B	B	B	B	B	B	B	B	B	B	B	B	B	B	B	B	B	B	B	B	B	B	B	B	B	B	B	B	B	B	B	B	B	B	B	B	B	B	B	B
be_T_G_chr18_2232788	18	2232788	-	T/G	A	A	A	H	A	H	A	A	A	A	A	A	H	A	A	B	A	A	A	A	A	H	A	A	A	A	A	H	A	A	A	A	H	A	A	A	A	A	A	B	A	A	A	H	A
be_T_G_chr18_random_2340906	18	2340906	+	A/C	A	A	A	H	A	A	A	A	A	A	A	A	H	A	A	A	A	A	A	A	A	A	A	A	A	A	H	A	A	A	A	A	H	A	A	H	A	A	A	H	H	A	A	A	A
be_T_G_chr19_17882396	19	17882396	-	T/G	H	H	A	A	A	A	A	A	A	A	A	A	A	A	A	A	A	H	A	A	A	A	A	H	A	H	A	H	A	H	A	A	A	A	A	A	A	A	H	A	A	A	A	H	H
be_T_G_chr19_20345381	19	20345381	-	T/G	H	H	H	H	H	A	H	A	H	A	A	A	H	H	A	A	H	H	H	H	H	A	A	H	H	H	A	A	A	H	H	A	A	A	H	A	A	U	H	A	H	H	H	A	H
be_T_G_chr19_3675092	19	3675092	+	A/C	A	A	A	A	A	A	H	A	A	A	A	A	A	A	A	A	A	U	A	H	A	A	H	H	A	H	A	A	A	A	A	A	A	A	H	A	A	H	A	A	A	A	A	H	H
be_T_G_chr19_8553807	19	8553807	+	A/C	A	H	A	A	A	A	A	A	A	A	A	A	H	A	A	A	A	A	A	A	A	A	A	A	A	A	H	A	A	A	A	A	A	A	A	H	A	A	A	A	H	A	A	A	A
be_T_G_chr3_12208763	3	12208763	-	T/G	H	H	H	H	B	H	H	H	B	B	B	B	H	B	A	H	B	H	B	A	B	H	B	H	B	H	H	H	B	B	B	A	H	B	B	H	H	B	H	H	H	B	B	H	A
be_T_G_chr5_16271736	5	16271736	-	T/G	A	A	A	A	A	A	A	H	A	H	A	H	H	A	A	H	H	A	A	A	H	H	A	U	H	A	A	H	A	H	A	A	A	A	H	A	A	A	A	A	A	A	A	H	A
be_T_G_chr6_16350574	6	16350574	+	A/C	H	H	A	A	A	A	A	A	A	A	A	A	H	A	A	A	A	H	A	A	A	H	A	H	H	H	H	A	A	H	A	A	A	A	A	A	A	A	H	A	H	A	A	H	A
be_T_G_chr6_4591590	6	4591590	+	A/C	A	A	A	H	A	A	A	A	A	A	A	A	A	A	A	A	A	A	A	A	A	A	A	H	A	A	H	A	A	A	A	A	A	A	A	A	A	A	A	H	H	A	A	A	A
be_T_G_chr6_5113191	6	5113191	+	A/C	A	A	A	H	A	A	A	A	A	A	A	A	A	A	A	A	A	A	A	A	A	H	A	A	A	A	H	H	A	H	A	A	A	A	A	A	A	A	H	H	H	A	A	A	A
be_T_G_chr7_19771590	7	19771590	+	A/C	H	B	H	A	A	A	A	H	B	B	B	B	A	H	A	A	A	A	U	H	B	B	A	H	H	B	H	A	A	H	A	A	A	H	H	H	A	A	A	H	A	H	B	A	B
be_T_G_chr7_3153109	7	3153109	+	A/C	A	H	A	A	A	A	A	A	A	A	A	A	A	A	A	A	A	A	A	A	A	A	A	U	A	H	A	H	A	A	A	A	A	A	A	A	A	A	A	A	A	A	A	A	H
be_T_G_chr7_6174106	7	6174106	-	T/G	A	H	A	A	A	A	A	A	A	H	A	H	H	A	A	A	A	A	A	A	A	A	A	H	A	H	A	H	A	A	A	A	A	A	A	A	A	A	A	A	A	A	A	A	H
be_T_G_chr8_12883689	8	12883689	-	T/G	A	A	A	A	A	A	A	A	A	A	A	A	A	A	A	A	A	H	A	A	A	A	A	A	A	A	A	A	A	A	A	A	A	A	A	A	A	A	A	A	A	A	A	A	A
be_T_G_chrUn_34031405	UN	34031405	+	A/C	A	H	A	A	A	A	A	A	A	A	A	A	A	A	A	A	A	A	A	A	A	A	A	A	A	A	H	A	A	A	A	A	A	A	A	H	A	A	A	A	A	A	A	A	A
be_T_G_chrUn_34432697	UN	34432697	-	T/G	H	H	H	H	H	H	H	A	H	H	H	H	A	A	A	A	H	A	H	A	H	H	A	H	A	H	A	A	H	H	H	A	H	H	A	A	H	A	H	A	H	A	H	A	H
chr1_10027559_G_T	1	10027559	+	A/C	A	A	B	H	A	B	B	H	A	A	A	H	H	A	B	B	A	B	A	H	A	A	B	U	A	H	H	H	B	H	A	A	H	A	H	B	H	B	A	H	A	H	A	H	H
chr1_10028695_G_T	1	10028695	+	A/C	A	A	A	A	A	A	A	A	A	A	A	A	A	A	A	A	A	A	A	A	A	A	A	A	A	A	A	A	A	A	A	A	A	A	A	A	A	A	A	A	A	A	A	A	A
chr1_10103455_C_T	1	10103455	+	A/G	B	B	B	B	B	B	B	H	B	B	B	B	H	B	H	B	B	B	B	B	B	B	B	B	B	B	B	B	H	B	B	B	B	B	B	B	B	B	B	B	B	B	B	B	B
chr1_10136235_A_G	1	10136235	+	A/G	A	A	A	A	A	U	H	A	A	A	A	A	A	A	A	A	A	A	A	A	A	A	A	A	A	A	A	A	A	A	A	A	A	A	A	A	H	A	A	A	A	A	A	H	A
chr1_10215474_A_G	1	10215474	+	A/G	H	H	H	H	B	U	H	H	B	H	B	H	A	B	H	A	B	A	B	B	B	H	B	U	B	H	A	H	H	H	B	H	H	B	H	A	B	B	H	A	H	H	B	H	H
chr1_10248041_A_G	1	10248041	+	A/G	A	A	A	A	A	A	H	H	A	A	A	A	H	A	H	A	A	A	A	A	A	A	A	A	A	A	A	A	A	A	A	A	A	A	A	A	H	A	A	A	A	A	A	H	A
chr1_10279151_A_G	1	10279151	+	A/G	A	A	A	A	A	A	H	A	A	A	A	A	A	A	H	A	A	A	A	A	A	A	A	A	A	A	A	A	H	A	A	H	A	A	A	A	H	A	A	A	A	A	A	H	A
chr1_10306186_C_T	1	10306186	-	T/C	A	A	A	A	A	A	A	H	A	A	A	A	H	A	H	A	A	A	A	A	A	A	A	A	A	A	A	A	A	A	A	A	A	A	A	A	A	A	A	A	A	A	A	A	A
chr1_10346685_G_T	1	10346685	-	T/G	B	B	H	B	B	B	B	B	B	B	B	B	B	B	B	B	B	B	B	B	B	B	B	B	B	B	B	B	B	B	B	B	B	B	B	B	B	B	B	B	B	B	B	B	B
chr1_10348071_C_T	1	10348071	-	T/C	A	A	A	A	A	H	H	H	A	A	A	A	H	A	H	A	A	A	A	A	A	A	A	H	A	A	A	A	H	A	A	H	A	A	A	A	H	A	H	A	A	A	A	H	A
chr1_10352546_C_T	1	10352546	+	A/G	B	B	B	B	B	B	B	B	B	B	B	B	B	B	B	B	B	B	B	B	B	B	B	B	B	B	B	B	B	B	B	B	B	B	B	B	B	B	B	B	B	B	B	B	B
chr1_10384689_A_G	1	10384689	-	T/C	A	A	A	A	A	A	H	A	A	A	A	A	A	A	A	A	A	A	A	A	A	A	A	H	A	A	A	A	H	A	A	H	A	A	A	A	H	A	H	A	A	A	A	H	A
chr1_10422513_C_T	1	10422513	+	A/G	A	A	A	A	A	A	H	H	A	A	A	A	H	A	H	A	A	A	A	A	A	A	A	H	A	A	A	A	A	A	A	B	A	A	A	A	H	A	H	A	A	A	A	H	A
chr1_10492345_A_G	1	10492345	+	A/G	A	A	H	A	A	A	A	A	A	A	A	A	A	A	A	A	A	A	A	A	A	A	A	A	A	A	A	A	A	A	A	A	A	A	A	A	A	A	A	A	A	A	A	A	A
chr1_10515896_C_T	1	10515896	+	A/G	B	B	B	B	B	B	B	B	B	B	B	B	B	B	B	B	B	B	B	B	B	B	B	B	B	B	B	B	B	B	B	B	B	B	B	B	B	B	B	B	B	B	B	B	B
chr1_10567353_C_T	1	10567353	+	A/G	A	A	A	A	A	A	A	H	A	A	A	A	H	A	H	A	A	A	A	A	A	A	A	A	A	A	A	A	H	A	A	H	A	A	A	A	A	A	A	A	A	A	A	A	A
chr1_10601560_C_T	1	10601560	+	A/G	A	A	B	A	A	U	B	A	A	A	A	A	A	A	A	A	A	A	A	A	A	A	A	A	A	A	A	A	A	A	A	A	A	A	A	A	A	A	A	A	A	A	A	B	A
chr1_10636113_A_G	1	10636113	-	T/C	B	B	B	B	B	B	B	H	B	B	B	B	H	B	H	B	B	B	B	B	B	B	B	B	B	B	B	B	B	B	B	B	B	B	B	B	H	B	B	B	B	B	B	B	B
chr1_10645223_A_C	1	10645223	-	T/G	B	B	H	B	B	B	H	H	B	B	B	B	B	B	H	B	B	B	B	B	B	H	B	B	B	B	B	B	B	B	B	B	B	B	B	B	B	B	B	B	B	B	B	H	B
chr1_10650149_G_T	1	10650149	+	A/C	H	A	A	A	A	A	A	A	A	A	A	H	A	A	A	A	A	A	A	H	A	A	B	A	A	A	H	A	A	A	A	A	A	A	H	H	H	B	A	H	A	H	A	H	A
chr1_10686955_C_T	1	10686955	+	A/G	H	H	H	H	A	U	A	A	A	H	A	A	B	A	H	B	A	B	A	A	A	H	A	H	A	H	H	H	H	H	A	H	H	A	H	H	H	A	B	H	H	A	A	H	H
chr1_10707573_A_G	1	10707573	-	T/C	A	A	A	A	A	A	A	A	A	A	A	A	H	A	B	A	A	A	A	A	A	A	A	H	A	A	A	A	H	A	A	B	A	A	A	A	A	A	H	A	A	A	A	A	A
chr1_10751301_A_C	1	10751301	-	T/G	B	B	H	B	B	B	U	H	B	B	B	B	B	B	A	B	B	B	B	B	B	B	B	B	B	B	B	B	B	B	B	B	B	B	B	B	B	B	B	B	B	B	B	H	B
chr1_10778771_A_G	1	10778771	+	A/G	B	B	A	B	B	B	H	H	B	B	B	B	B	B	A	B	B	B	B	B	B	B	B	B	B	B	B	B	B	B	B	B	B	B	B	B	B	B	B	B	B	B	B	H	B
chr1_10815671_A_G	1	10815671	-	T/C	B	B	B	B	B	B	B	B	B	B	B	B	B	B	B	B	B	B	B	B	B	B	B	H	B	B	B	B	B	B	B	H	B	B	B	B	B	B	H	B	B	B	B	B	B
chr1_10822572_A_G	1	10822572	+	A/G	A	A	A	A	A	A	A	A	A	A	A	A	A	A	A	A	A	A	A	A	A	A	A	A	A	A	A	A	H	A	A	A	A	A	A	A	A	A	A	A	A	A	A	A	A
chr1_10848183_C_T	1	10848183	+	A/G	B	B	B	B	B	B	H	H	B	B	B	B	B	B	H	B	B	B	B	B	B	B	B	U	B	B	B	B	B	B	B	B	B	B	B	B	H	B	B	B	B	B	B	H	B
chr1_1087116_A_G	1	1087116	-	T/C	A	A	H	A	A	U	H	A	A	A	A	A	H	A	B	A	A	A	A	A	A	A	A	H	A	A	A	A	A	A	A	H	A	A	A	A	H	A	A	A	A	A	A	A	A
chr1_10879621_G_T	1	10879621	+	A/C	B	B	B	B	B	U	H	B	B	B	B	B	B	B	B	B	B	B	B	B	B	B	B	B	B	B	B	B	B	B	B	B	B	B	B	B	B	B	B	B	B	B	B	H	B
chr1_10913571_C_T	1	10913571	+	A/G	A	A	A	A	A	A	A	A	A	A	A	A	H	A	A	A	A	A	A	A	A	A	A	A	A	A	A	A	A	A	A	H	A	A	A	A	A	A	A	A	A	A	A	A	A
chr1_11007311_G_T	1	11007311	+	A/C	A	A	H	A	A	A	A	A	A	A	A	A	A	A	B	A	A	A	A	A	A	A	A	A	A	A	A	A	A	A	A	A	A	A	A	A	A	A	A	A	A	A	A	A	A
chr1_11010707_G_T	1	11010707	-	T/G	A	A	A	A	A	U	H	A	A	A	A	A	A	A	A	A	A	A	A	A	A	A	A	A	A	A	A	A	A	A	A	A	A	A	A	A	A	A	A	A	A	A	A	H	A
chr1_11027925_C_T	1	11027925	+	A/G	A	A	A	A	A	A	H	A	A	A	A	A	A	A	A	A	A	A	A	A	A	A	A	A	A	A	A	A	A	A	A	A	A	A	A	A	A	A	A	A	A	A	A	H	A
chr1_11183949_C_T	1	11183949	-	T/C	A	A	H	A	A	U	U	A	A	A	A	A	A	A	U	A	A	A	A	U	A	A	A	H	A	A	A	A	H	A	A	B	A	A	A	A	H	A	H	A	A	A	A	H	A
chr1_11198094_A_G	1	11198094	-	T/C	B	B	B	B	B	B	B	H	B	B	B	B	B	B	H	B	B	B	B	B	B	B	B	H	B	B	B	B	H	B	B	H	B	B	B	B	H	B	H	B	B	B	B	B	B
chr1_11207220_A_G	1	11207220	-	T/C	A	H	B	A	A	A	H	A	B	A	A	H	H	H	B	A	A	A	A	B	A	H	H	H	B	H	A	B	A	H	A	A	A	A	A	A	A	B	A	A	H	B	A	H	H
chr1_11240032_A_G	1	11240032	-	T/C	B	B	B	B	B	B	B	A	U	B	U	B	H	B	B	U	U	B	B	B	B	B	B	H	B	B	B	B	H	B	B	A	B	U	B	B	B	B	H	B	B	B	B	B	B
chr1_11313468_C_T	1	11313468	+	A/G	B	B	H	B	B	B	B	H	B	B	B	B	B	B	A	B	B	B	B	B	B	B	B	H	B	B	B	B	H	B	B	A	B	B	B	B	B	B	H	B	B	B	B	B	B
chr1_11324024_A_G	1	11324024	+	A/G	B	B	B	B	B	B	B	B	B	B	B	B	B	B	H	B	B	B	B	B	B	B	B	B	B	B	B	B	B	B	B	B	B	B	B	B	B	B	B	B	B	B	B	B	B
chr1_11333731_C_T	1	11333731	+	A/G	B	B	B	B	B	U	A	B	B	B	B	B	B	B	B	B	B	B	B	U	B	B	U	B	B	B	B	B	B	B	B	B	B	B	B	B	U	U	B	B	B	B	B	A	B
chr1_11384586_A_G	1	11384586	-	T/C	H	H	H	H	B	H	B	B	B	H	B	B	U	B	H	U	B	H	B	B	B	H	B	H	B	H	U	H	B	H	B	H	H	B	H	U	B	B	U	U	H	U	B	H	H
chr1_11414632_C_T	1	11414632	+	A/G	A	A	A	A	A	A	H	H	A	A	A	A	H	A	H	A	A	A	A	A	A	A	A	H	A	A	A	A	H	A	A	B	A	A	A	A	H	A	H	A	A	A	A	H	A
chr1_11428082_C_T	1	11428082	+	A/G	B	B	B	B	U	B	B	B	U	B	U	B	B	U	B	B	B	B	U	B	U	B	B	H	B	B	B	B	B	B	B	H	B	U	B	B	B	B	H	B	B	B	U	B	B
chr1_11457396_C_T	1	11457396	+	A/G	A	A	A	A	A	U	H	H	A	A	A	A	H	A	A	A	A	A	A	A	A	A	A	A	A	A	A	A	H	A	A	H	A	A	A	A	H	A	A	A	A	A	A	H	A
chr1_11527964_A_G	1	11527964	+	A/G	A	A	H	A	A	A	A	A	A	A	A	A	H	A	B	A	A	A	A	A	A	A	A	A	A	A	A	A	A	A	A	A	A	A	A	A	A	A	A	A	A	A	A	A	A
chr1_11576311_A_C	1	11576311	+	A/C	A	A	A	A	A	A	H	H	A	A	A	A	A	A	A	A	A	A	A	A	A	A	A	H	A	A	A	A	H	A	A	U	A	A	A	A	H	A	H	A	A	A	A	H	A
chr1_11600448_A_G	1	11600448	+	A/G	A	A	A	A	A	A	H	A	A	A	A	A	A	A	A	A	A	A	A	A	A	A	A	A	A	A	A	A	A	A	A	A	A	A	A	A	H	A	A	A	A	A	A	H	A
chr1_11622136_A_G	1	11622136	-	T/C	B	B	H	B	B	U	U	B	B	B	B	B	H	B	A	B	B	B	B	B	B	B	B	H	B	B	B	B	U	B	B	A	B	B	B	B	U	B	H	B	B	B	B	H	B
chr1_1163551_A_G	1	1163551	-	T/C	A	A	A	A	A	A	A	H	A	A	A	A	H	A	B	A	A	A	A	A	A	A	A	A	A	A	H	A	H	A	A	B	A	H	A	H	B	A	H	A	A	H	A	H	A
chr1_1164056_G_T	1	1164056	+	A/C	B	B	B	B	B	B	B	H	B	B	B	B	H	B	A	B	B	B	B	B	B	B	B	B	B	B	B	B	H	B	B	A	B	B	B	B	A	B	H	B	B	B	B	H	B
chr1_11675585_A_G	1	11675585	+	A/G	H	B	B	B	B	B	B	B	B	B	B	B	B	H	B	B	B	B	H	B	B	H	B	B	B	B	B	B	B	H	B	B	B	B	B	B	B	B	B	B	B	B	B	H	B
chr1_11680867_A_G	1	11680867	+	A/G	B	B	H	B	B	U	H	B	B	B	B	B	H	B	A	B	B	B	B	B	B	B	B	H	B	B	B	B	H	B	B	A	B	B	B	B	H	B	H	B	B	B	B	H	B
chr1_11709592_A_G	1	11709592	+	A/G	B	B	B	B	B	B	H	H	B	B	B	B	B	B	B	B	B	A	B	B	B	H	B	B	B	B	B	B	B	B	B	B	B	B	B	B	B	B	B	B	B	H	B	B	B
chr1_1173370_G_T	1	1173370	+	A/C	A	A	A	A	A	A	A	A	A	A	A	A	A	A	A	A	A	U	A	A	A	A	A	A	A	A	A	A	H	A	A	A	A	A	A	A	A	A	H	A	A	A	A	H	A
chr1_11738703_C_T	1	11738703	-	T/C	B	B	B	B	B	B	B	H	B	B	B	B	B	B	B	B	B	B	B	B	B	B	B	B	B	B	B	B	B	B	B	B	B	B	B	B	B	B	B	B	B	B	B	B	B
chr1_11739249_C_T	1	11739249	-	T/C	A	A	A	A	A	U	H	A	A	A	A	H	H	A	A	A	A	A	A	A	A	A	A	A	A	A	A	A	A	A	A	A	A	A	A	A	A	A	A	A	A	A	A	H	A
chr1_11773499_C_T	1	11773499	+	A/G	A	A	H	A	A	A	A	H	A	A	A	A	A	A	H	A	A	A	A	A	A	A	A	A	A	A	A	A	A	A	A	H	A	A	A	A	A	A	A	A	A	A	A	A	A
chr1_11818337_C_T	1	11818337	+	A/G	A	A	A	A	A	A	A	H	A	A	A	A	A	A	H	A	A	A	A	A	A	A	A	A	A	A	A	A	A	A	A	A	A	A	A	A	A	A	A	A	A	A	A	A	A
chr1_11853324_A_G	1	11853324	+	A/G	A	A	A	A	A	A	H	A	A	A	A	A	H	A	A	A	A	A	A	A	A	A	A	H	A	A	A	A	H	A	A	B	A	A	A	A	H	A	H	A	A	A	A	H	A
chr1_11858923_A_G	1	11858923	+	A/G	B	B	B	B	B	B	H	B	B	B	B	B	B	B	B	B	B	U	B	B	B	B	B	B	B	B	B	B	B	B	B	B	B	B	B	B	B	B	B	B	B	B	B	B	B
chr1_11874008_C_T	1	11874008	-	T/C	B	B	H	B	B	B	B	B	B	B	B	B	B	B	B	B	B	B	B	B	B	B	B	H	B	B	B	B	H	B	B	A	B	B	B	B	B	B	H	B	B	B	B	B	B
chr1_119067_G_T	1	119067	-	T/G	A	A	H	A	A	U	H	U	U	A	A	A	A	A	A	A	A	A	A	A	A	A	A	H	A	A	A	A	A	A	A	A	A	A	A	A	A	A	A	A	A	A	A	A	A
chr1_11969030_A_G	1	11969030	+	A/G	B	B	H	B	B	B	B	B	U	B	B	B	B	B	B	U	B	B	B	B	B	B	B	H	B	B	U	U	B	B	B	H	B	B	B	U	B	B	H	U	B	B	B	B	B
chr1_11988940_A_C	1	11988940	+	A/C	A	A	A	A	A	A	A	A	A	A	A	A	A	A	A	A	A	A	A	A	A	A	A	H	A	A	A	A	A	A	A	H	A	A	A	A	A	A	H	A	A	A	A	A	A
chr1_11996175_C_T	1	11996175	-	T/C	B	B	H	B	B	B	B	B	B	B	B	B	B	B	B	B	B	B	B	B	B	B	B	U	B	H	B	B	B	B	B	B	B	B	B	B	B	B	B	B	B	B	B	B	H
chr1_12012741_C_T	1	12012741	+	A/G	A	A	A	A	A	A	A	A	A	A	A	A	A	A	A	A	A	A	A	A	A	A	A	A	A	A	A	A	A	A	A	A	A	A	A	A	A	A	A	A	A	A	A	A	A
chr1_12046683_A_G	1	12046683	+	A/G	B	B	H	B	B	U	H	B	B	B	B	B	H	B	B	B	B	B	B	B	B	B	B	B	B	B	B	B	B	B	B	B	B	B	B	B	H	B	B	B	B	B	B	H	B
chr1_12056309_C_T	1	12056309	-	T/C	B	B	B	B	B	B	B	H	B	B	B	B	B	B	B	B	B	B	B	B	B	B	B	B	B	B	B	B	H	B	B	A	B	B	B	B	B	B	U	B	B	B	B	B	B
chr1_12092270_C_T	1	12092270	-	T/C	H	B	H	B	B	B	B	H	B	H	B	H	B	B	A	B	B	H	B	B	B	H	B	H	B	B	B	B	H	B	B	A	B	B	H	B	B	B	A	B	B	H	B	H	B
chr1_12168156_C_T	1	12168156	-	T/C	B	B	H	B	B	B	B	H	B	B	B	B	B	B	B	B	B	B	B	B	B	B	B	H	B	B	B	B	B	B	B	A	B	B	B	B	B	B	H	B	B	B	B	B	B
chr1_12212304_C_T	1	12212304	-	T/C	A	A	A	A	A	A	A	H	A	A	A	A	A	A	H	A	A	A	A	A	A	A	A	H	A	A	A	A	H	A	A	B	A	A	A	A	A	A	H	A	A	A	A	A	A
chr1_12214564_A_G	1	12214564	-	T/C	A	A	A	A	A	A	A	A	A	A	A	A	A	A	H	A	A	A	A	A	A	A	A	H	A	A	A	A	H	A	A	B	A	A	A	A	A	A	H	A	A	A	A	A	A
chr1_1222768_G_T	1	1222768	+	A/C	A	A	A	A	A	A	A	H	A	A	A	A	H	A	A	A	A	A	A	A	A	A	A	A	A	A	A	A	A	A	A	H	A	A	A	A	A	A	A	A	A	A	A	A	A
chr1_12241211_A_G	1	12241211	+	A/G	A	A	A	A	A	A	H	H	A	A	A	A	H	A	H	A	A	A	A	A	A	A	A	H	A	A	A	A	H	A	A	B	A	A	A	A	H	A	H	A	A	A	A	H	A
chr1_12284201_G_T	1	12284201	+	A/C	H	H	A	A	A	A	H	H	A	H	A	H	H	A	H	A	A	B	A	A	A	A	A	H	A	A	H	H	B	H	A	B	A	A	H	H	H	A	B	H	H	A	A	B	A
chr1_12352034_C_T	1	12352034	+	A/G	B	B	H	B	B	B	B	B	B	B	B	B	B	B	H	B	B	A	B	B	B	B	B	B	B	B	U	H	H	H	B	B	B	B	H	H	B	B	B	H	B	B	B	B	B
chr1_12361877_A_G	1	12361877	-	T/C	B	H	B	H	B	B	H	H	B	B	H	H	H	A	H	B	B	B	A	A	H	B	A	H	B	H	B	B	H	H	A	A	H	A	H	B	H	H	H	B	H	B	A	H	H
chr1_12400623_A_G	1	12400623	+	A/G	B	B	B	B	B	B	B	B	B	B	B	B	B	B	H	B	U	B	B	B	B	B	B	B	B	B	B	B	B	B	B	B	B	B	B	B	B	B	B	B	B	B	B	B	B
chr1_12552777_A_G	1	12552777	-	T/C	A	A	H	A	A	A	H	A	A	A	A	A	H	A	H	A	A	A	A	A	A	A	A	A	A	A	A	A	A	A	A	H	A	A	A	A	H	A	A	A	A	A	A	H	A
chr1_12560573_A_G	1	12560573	-	T/C	A	H	B	B	B	B	H	B	B	B	B	H	H	B	H	B	B	B	B	B	B	B	B	H	B	B	H	B	A	H	B	A	B	B	B	B	H	B	B	H	H	B	B	A	B
chr1_12603724_A_G	1	12603724	+	A/G	B	B	B	B	B	B	B	H	B	B	B	B	B	B	H	B	B	B	B	B	B	B	B	B	B	B	B	B	H	B	B	B	B	B	B	B	B	B	H	B	B	B	B	B	B
chr1_1261165_A_C	1	1261165	-	T/G	B	B	B	B	B	B	B	B	B	B	B	B	B	B	B	B	B	B	B	B	B	B	B	B	B	B	B	B	B	B	B	B	B	B	B	B	B	B	B	B	B	B	B	B	B
chr1_12648747_A_C	1	12648747	+	A/C	A	A	A	A	A	A	A	A	A	A	A	A	A	A	H	A	A	A	A	A	A	A	A	A	A	A	H	A	A	A	A	A	A	A	A	A	A	A	A	H	A	A	A	A	A
chr1_12655926_A_C	1	12655926	+	A/C	A	A	A	A	A	A	A	H	A	A	A	A	A	A	H	A	A	A	A	A	A	A	A	H	A	A	A	A	B	A	A	H	A	A	A	A	A	A	H	A	A	A	A	A	A
chr1_12668414_A_G	1	12668414	+	A/G	B	B	B	B	B	B	B	H	B	B	B	B	B	B	H	B	B	B	U	U	B	B	U	A	B	B	B	B	H	B	B	H	B	B	B	B	B	U	H	B	B	B	B	B	B
chr1_1302400_C_T	1	1302400	-	T/C	A	A	H	A	A	U	H	A	A	A	A	A	A	A	A	A	A	A	A	A	A	A	A	H	A	A	A	A	A	A	A	A	A	A	A	A	A	A	A	A	A	A	A	A	A
chr1_1304398_C_T	1	1304398	-	T/C	A	A	H	A	A	A	H	A	A	A	A	A	A	A	H	A	A	A	A	A	A	A	A	H	A	A	A	A	A	A	A	A	A	A	A	A	A	A	A	A	A	A	A	A	A
chr1_1336961_G_T	1	1336961	+	A/C	H	A	A	A	A	A	H	H	A	A	A	H	H	A	H	H	A	A	A	A	A	A	A	A	A	A	A	H	H	A	A	B	A	A	A	A	B	A	B	A	A	A	A	B	A
chr1_13669728_C_T	1	13669728	-	T/C	B	B	B	B	B	B	H	H	B	B	B	B	B	B	H	B	B	B	B	B	B	B	B	B	B	B	B	B	H	B	B	B	B	B	B	B	B	B	H	B	B	B	B	B	B
chr1_13680311_A_G	1	13680311	+	A/G	H	H	H	H	A	U	H	A	A	H	A	H	H	A	A	B	A	B	A	A	A	H	A	H	A	H	B	H	H	H	A	H	H	A	H	B	A	A	H	B	H	A	A	H	H
chr1_1372222_C_T	1	1372222	-	T/C	A	A	A	A	A	A	A	A	A	A	A	A	A	A	H	A	A	A	A	A	A	A	A	A	A	A	A	A	A	A	A	A	A	A	A	A	H	A	H	A	A	A	A	A	A
chr1_13811691_C_T	1	13811691	-	T/C	A	A	A	A	A	A	A	A	A	A	A	A	A	A	A	A	A	A	A	A	A	A	A	H	A	A	A	A	A	A	A	H	A	A	A	A	A	A	A	A	A	A	A	A	A
chr1_13836783_C_T	1	13836783	+	A/G	B	B	B	B	B	B	H	H	B	B	B	B	U	B	H	B	B	B	B	B	B	B	B	H	B	B	B	B	H	B	B	A	B	B	B	B	H	B	U	B	B	B	B	U	B
chr1_13920137_A_G	1	13920137	-	T/C	A	A	A	A	A	A	H	H	A	A	A	A	H	A	H	A	A	A	A	A	A	A	A	H	A	A	A	A	H	A	A	B	A	A	A	A	H	A	B	A	A	A	A	B	A
chr1_13921759_G_T	1	13921759	-	T/G	B	B	B	B	B	B	B	B	B	B	B	B	B	B	H	B	B	B	B	B	B	B	B	B	B	B	B	B	B	B	B	B	B	B	B	B	B	B	B	B	B	B	B	B	B
chr1_13951520_C_T	1	13951520	+	A/G	A	A	A	A	A	A	H	A	A	A	A	A	H	A	H	A	A	A	A	A	A	A	A	H	A	A	A	A	H	A	A	H	A	A	A	A	H	A	H	A	A	A	A	H	A
chr1_13972387_G_T	1	13972387	-	T/G	A	A	H	A	A	A	A	A	A	A	A	A	A	A	A	A	A	A	A	A	A	A	A	A	A	A	A	A	A	A	A	A	A	A	A	A	A	A	A	A	A	A	A	A	A
chr1_13989145_A_C	1	13989145	+	A/C	B	B	H	B	B	B	B	H	B	B	B	B	B	B	H	B	B	B	B	B	B	B	B	B	B	B	B	B	B	B	B	B	B	B	B	B	B	B	B	B	B	B	B	B	B
chr1_14006648_C_T	1	14006648	-	T/C	B	B	H	B	B	B	B	H	B	B	B	B	B	B	H	B	B	B	B	B	B	B	B	B	B	B	B	B	B	B	B	B	B	B	B	B	B	B	B	B	B	B	B	B	B
chr1_1403770_C_T	1	1403770	-	T/C	B	B	H	B	B	B	H	B	B	B	B	B	B	B	H	B	B	B	B	B	B	B	B	H	B	B	B	B	B	B	B	B	B	B	B	B	B	B	B	B	B	B	B	B	B
chr1_14044589_A_G	1	14044589	+	A/G	B	B	H	B	B	B	B	B	B	B	B	B	B	B	B	B	B	B	B	B	B	B	B	B	B	B	B	B	B	B	B	B	B	B	B	B	B	B	B	B	B	B	B	B	B
chr1_14059862_G_T	1	14059862	-	T/G	A	A	H	A	A	A	A	A	A	A	A	A	A	A	A	A	A	A	A	A	A	A	A	A	A	A	A	A	A	A	A	A	A	A	A	A	A	A	A	A	A	A	A	A	A
chr1_14163808_C_T	1	14163808	+	A/G	B	B	H	B	B	B	H	H	B	B	B	B	H	B	H	B	B	B	B	B	B	B	B	H	B	B	B	B	H	B	B	A	B	B	B	B	H	B	H	B	B	B	B	H	B
chr1_14215925_A_G	1	14215925	-	T/C	A	A	A	A	A	A	A	H	A	A	A	A	A	A	A	A	A	A	A	A	A	A	A	A	A	A	A	A	A	A	A	A	A	A	A	A	A	A	H	A	A	A	A	A	A
chr1_14217751_G_T	1	14217751	-	T/G	B	B	B	B	B	B	B	B	B	B	B	B	B	B	H	B	B	B	B	B	B	B	B	B	B	B	B	B	H	B	B	B	B	B	B	B	B	B	B	B	B	B	B	B	B
chr1_14232730_C_T	1	14232730	-	T/C	A	B	B	U	B	U	U	H	B	U	B	A	B	A	A	U	U	B	A	B	A	U	B	B	A	B	A	A	A	H	A	B	U	A	B	A	B	B	H	A	A	B	H	B	H
chr1_14302982_C_T	1	14302982	-	T/C	B	H	B	B	B	B	U	H	B	H	B	B	H	B	B	H	B	B	B	U	B	H	U	B	B	H	U	B	B	B	B	B	U	H	B	U	B	U	B	B	B	B	B	B	H
chr1_14306100_C_T	1	14306100	-	T/C	B	B	B	B	B	B	B	B	B	B	B	B	B	B	B	B	B	B	B	B	B	B	B	B	B	B	B	B	B	B	B	B	B	B	B	B	B	B	B	B	B	B	B	B	B
chr1_14309754_A_C	1	14309754	-	T/G	U	B	B	B	B	B	B	B	B	B	B	B	B	B	B	B	B	B	B	B	B	B	B	B	B	B	B	B	H	B	B	B	B	B	B	B	B	B	B	B	B	B	B	B	B
chr1_1449213_C_T	1	1449213	-	T/C	A	A	A	A	A	A	A	A	A	A	A	A	A	A	A	A	A	A	A	A	A	A	A	A	A	A	A	A	H	A	A	A	A	A	A	A	H	A	A	A	A	A	A	H	A
chr1_14575102_C_T	1	14575102	+	A/G	A	A	A	A	A	A	A	A	A	A	A	A	A	A	A	A	A	A	A	U	A	A	A	H	U	A	A	A	A	A	A	H	A	A	A	A	A	A	A	A	A	A	A	A	A
chr1_14581112_A_G	1	14581112	-	T/C	A	A	A	A	A	A	A	A	A	A	A	A	A	A	A	A	A	A	A	A	A	A	A	H	U	A	A	A	A	A	A	H	A	A	A	A	A	A	A	A	A	A	A	A	A
chr1_1458632_A_G	1	1458632	+	A/G	B	B	B	B	B	B	B	B	B	B	B	B	H	B	B	B	B	B	B	B	B	B	B	B	B	B	B	B	B	B	B	H	B	B	B	B	B	B	B	B	B	B	B	B	B
chr1_14624429_C_T	1	14624429	-	T/C	A	A	A	A	A	A	A	A	A	A	A	A	H	A	H	A	A	A	A	A	A	A	A	A	A	A	A	A	A	A	A	H	A	A	A	A	H	A	A	A	A	A	A	H	A
chr1_14627879_A_G	1	14627879	-	T/C	A	A	U	A	A	A	A	H	A	A	A	A	H	A	H	A	A	A	A	A	A	A	A	A	A	A	A	A	A	A	A	H	A	A	A	A	H	A	A	A	A	A	A	H	A
chr1_14667660_C_T	1	14667660	-	T/C	B	H	H	H	A	B	B	A	A	H	A	H	H	A	H	B	A	B	A	H	H	H	B	H	A	H	B	H	H	H	H	A	H	A	H	B	H	B	B	B	H	H	A	H	H
chr1_14668769_C_T	1	14668769	+	A/G	A	A	H	A	A	A	A	H	A	A	A	A	H	A	H	A	A	A	A	A	A	A	A	A	A	A	A	A	A	A	A	H	A	A	A	A	H	A	A	A	A	A	A	H	A
chr1_14806053_A_G	1	14806053	-	T/C	B	B	B	B	B	B	B	B	B	B	B	B	H	B	B	B	B	B	B	B	B	B	B	B	B	B	B	B	B	B	B	H	B	B	B	B	H	B	B	B	B	B	B	H	B
chr1_1482338_G_T	1	1482338	+	A/C	B	B	B	B	B	B	B	B	B	B	B	B	H	B	B	B	B	B	B	B	B	B	B	B	B	B	B	B	H	B	B	H	B	B	B	B	H	B	B	B	B	B	B	H	B
chr1_1482634_C_T	1	1482634	+	A/G	A	A	A	A	A	A	A	H	A	A	A	A	A	A	A	A	A	A	A	A	A	A	A	A	A	A	A	A	A	A	A	A	A	H	A	A	A	A	A	A	A	H	A	A	A
chr1_14860048_A_G	1	14860048	+	A/G	A	A	A	A	A	A	A	H	A	A	A	H	A	A	A	A	A	A	A	A	A	A	A	A	A	A	A	A	A	A	A	A	A	A	A	A	A	A	A	A	A	A	A	A	A
chr1_14954166_G_T	1	14954166	+	A/C	B	B	B	B	B	B	H	H	B	B	B	B	B	B	H	B	B	B	B	B	B	B	B	H	B	B	B	B	H	B	B	H	B	B	B	B	B	B	H	B	B	B	B	B	B
chr1_14958139_A_G	1	14958139	+	A/G	A	A	A	A	A	A	H	H	A	A	A	A	A	A	H	A	A	A	A	A	A	A	A	H	A	A	A	A	A	A	A	H	A	A	A	A	A	A	H	A	A	A	A	A	A
chr1_14983549_A_G	1	14983549	+	A/G	A	A	A	A	A	H	A	A	A	A	A	A	A	A	A	A	A	A	A	A	A	A	A	A	A	A	A	A	B	A	A	A	A	A	A	A	A	A	A	A	A	A	A	A	A
chr1_15016961_A_G	1	15016961	-	T/C	B	B	H	B	B	B	B	B	B	B	B	B	H	B	H	B	B	B	B	B	B	B	B	B	B	B	B	B	B	B	B	H	B	B	B	B	H	B	B	B	B	B	B	H	B
chr1_1513844_A_C	1	1513844	-	T/G	B	B	B	B	B	B	B	B	B	B	B	B	B	B	B	B	B	B	B	B	B	B	B	B	B	B	B	B	B	B	B	B	B	B	B	B	B	B	H	B	B	B	B	B	B
chr1_15601334_A_G	1	15601334	-	T/C	H	H	A	H	B	A	A	H	B	H	B	B	A	B	H	A	B	B	B	B	B	H	B	H	B	H	A	H	A	H	B	A	A	B	B	A	H	B	A	A	H	B	B	A	H
chr1_15605027_A_G	1	15605027	-	T/C	B	B	B	B	B	B	B	B	B	B	B	B	B	B	B	B	B	B	B	B	B	B	B	B	B	B	B	B	B	B	B	B	B	B	B	B	B	B	B	B	B	B	B	B	B
chr1_1562688_A_C	1	1562688	+	A/C	B	B	B	B	B	B	B	B	B	B	B	B	B	B	B	B	B	B	B	B	B	B	B	B	B	B	B	B	B	B	B	H	B	B	B	B	B	B	B	B	B	B	B	B	B
chr1_15657631_G_T	1	15657631	-	T/G	B	B	B	B	B	B	B	B	B	B	B	B	B	B	B	B	B	B	B	B	B	B	B	B	B	B	B	B	B	B	B	B	B	B	B	B	B	B	B	B	B	B	B	B	B
chr1_15659319_C_T	1	15659319	+	A/G	A	A	H	A	A	A	A	A	A	A	A	A	H	A	H	A	A	A	A	A	A	A	A	A	A	A	A	A	A	A	A	A	A	A	A	A	H	A	A	A	A	A	A	H	A
chr1_15702664_A_G	1	15702664	-	T/C	A	A	A	A	A	A	H	A	A	A	A	A	A	A	H	A	A	A	A	A	A	A	A	H	A	A	A	A	H	A	A	B	A	A	A	A	A	A	H	A	A	A	A	A	A
chr1_15717010_A_C	1	15717010	+	A/C	H	B	H	B	B	U	A	H	B	H	B	H	H	B	A	B	B	B	B	H	B	B	A	H	B	B	B	B	H	B	B	A	B	B	B	B	H	B	A	B	B	H	B	A	B
chr1_15717071_C_T	1	15717071	+	A/G	A	A	A	A	A	A	H	A	A	A	A	A	A	A	H	A	A	A	A	A	A	A	A	H	A	A	A	A	H	A	A	B	A	A	A	A	A	A	H	A	A	A	A	A	A
chr1_15761994_A_G	1	15761994	-	T/C	B	H	B	B	B	B	B	B	B	B	B	B	H	B	B	B	B	B	B	H	B	B	H	B	B	B	B	U	B	B	B	B	H	B	B	B	H	H	B	B	H	B	B	H	B
chr1_15804771_A_G	1	15804771	-	T/C	A	H	H	H	H	H	H	A	A	H	H	H	H	A	H	B	H	A	H	A	A	A	A	H	A	B	H	A	H	B	A	B	A	H	A	H	A	A	H	H	H	A	B	A	B
chr1_1583561_A_G	1	1583561	+	A/G	B	B	H	B	B	B	B	H	B	B	B	B	H	B	B	B	B	B	B	B	B	B	B	H	B	B	B	B	B	B	B	H	B	B	B	B	B	B	B	B	B	B	B	B	B
chr1_15843271_A_G	1	15843271	+	A/G	H	H	B	H	A	H	H	H	A	H	A	H	B	H	H	B	A	B	H	B	A	H	B	H	A	H	B	B	H	H	H	A	B	A	A	B	H	H	A	B	H	H	A	B	H
chr1_15882089_C_T	1	15882089	-	T/C	A	A	A	A	A	U	H	A	A	A	A	A	A	A	H	A	A	A	A	A	A	A	A	A	A	A	A	A	A	A	A	A	A	A	A	A	A	A	H	A	A	A	A	A	A
chr1_15889332_A_G	1	15889332	+	A/G	H	B	H	H	B	H	H	B	B	H	B	B	A	B	B	H	B	B	B	B	B	H	B	U	B	H	A	B	H	B	B	B	H	B	B	A	H	B	H	A	B	B	B	A	H
chr1_15909374_C_T	1	15909374	-	T/C	A	A	H	U	A	H	B	U	A	A	A	A	H	A	B	A	A	B	U	A	A	A	U	A	A	A	H	A	A	A	A	A	H	A	U	A	U	A	H	H	A	A	A	H	A
chr1_15927368_A_G	1	15927368	+	A/G	B	B	B	B	B	B	B	B	B	B	B	B	B	B	B	B	B	B	B	B	B	B	B	B	B	B	B	B	B	B	B	B	B	B	B	B	B	B	B	B	B	B	B	B	B
chr1_15934554_C_T	1	15934554	+	A/G	A	A	A	A	A	H	H	A	A	A	A	A	A	A	H	A	A	A	A	A	A	A	A	H	A	A	A	A	H	A	A	B	A	A	A	A	A	A	H	A	A	A	A	A	A
chr1_159994_G_T	1	159994	-	T/G	B	B	H	B	B	U	H	H	B	B	B	B	H	B	A	B	B	B	B	B	B	B	B	H	B	B	B	B	H	B	B	A	B	B	B	B	A	B	H	B	B	B	B	H	B
chr1_1611098_A_C	1	1611098	+	A/C	A	A	A	A	A	A	A	A	A	A	A	A	U	A	A	A	A	A	A	A	A	A	A	A	A	A	A	A	A	A	A	H	A	A	A	A	A	A	A	A	A	A	A	A	A
chr1_16159075_C_T	1	16159075	-	T/C	B	B	H	B	B	B	B	H	B	B	U	B	H	U	H	B	B	B	H	H	B	B	H	H	B	B	B	H	H	B	B	H	B	B	H	B	H	H	B	B	B	H	B	B	B
chr1_16197622_A_G	1	16197622	+	A/G	B	B	B	B	B	B	B	B	B	B	B	B	B	H	B	B	B	B	B	B	B	B	B	B	B	B	B	B	H	B	H	H	B	H	B	B	B	B	B	B	B	B	H	B	B
chr1_16205431_A_C	1	16205431	+	A/C	A	A	A	A	A	A	A	A	A	A	A	A	A	A	A	A	A	A	A	A	A	A	A	H	A	A	A	A	B	A	A	B	A	A	A	A	A	A	A	A	A	A	A	A	A
chr1_1620902_C_T	1	1620902	-	T/C	A	A	A	A	A	A	A	A	A	A	A	A	H	A	H	A	A	A	A	A	A	A	A	A	A	A	A	A	A	A	A	H	A	A	A	A	H	A	A	A	A	A	A	A	A
chr1_16242814_C_T	1	16242814	-	T/C	A	A	A	A	A	A	H	A	H	A	A	A	A	A	H	A	A	A	A	A	A	A	A	A	A	A	A	A	A	A	A	A	A	A	A	A	A	A	H	A	A	A	A	H	A
chr1_16266476_C_T	1	16266476	+	A/G	B	B	B	H	B	H	B	U	H	B	U	B	B	B	B	B	H	B	B	H	B	B	B	B	B	B	B	H	B	B	B	B	H	B	B	B	B	B	B	B	B	B	B	B	B
chr1_16384739_A_G	1	16384739	-	T/C	A	A	H	A	A	U	H	H	A	A	A	A	A	A	B	A	A	A	A	A	A	A	A	A	A	A	A	A	A	A	A	A	A	A	A	A	A	A	H	A	A	A	A	H	A
chr1_164167_C_T	1	164167	+	A/G	H	B	B	B	H	B	H	H	A	B	B	A	H	A	B	H	H	A	B	H	B	H	H	U	H	H	B	B	A	B	B	A	B	H	A	B	H	B	H	B	B	B	H	H	H
chr1_16444162_C_T	1	16444162	-	T/C	B	B	H	B	B	B	B	B	B	B	B	B	B	B	H	B	B	B	B	B	B	B	B	B	B	B	B	B	B	B	B	B	B	B	B	B	B	B	B	B	B	B	B	B	B
chr1_16479147_A_G	1	16479147	-	T/C	A	A	A	A	A	A	H	H	A	A	A	A	A	A	A	A	A	A	A	A	A	A	A	A	A	A	A	A	A	A	A	A	A	A	A	A	A	A	A	A	A	A	A	A	A
chr1_16513552_C_T	1	16513552	-	T/C	B	B	B	B	B	B	B	B	B	B	B	B	A	B	B	B	B	B	B	B	B	B	B	B	B	B	B	B	B	B	B	B	B	B	B	B	A	B	B	B	B	B	B	B	B
chr1_16550466_A_G	1	16550466	-	T/C	A	A	A	A	A	U	H	A	A	A	A	A	A	A	H	A	A	A	A	A	A	A	A	H	A	A	A	A	A	A	A	B	A	A	A	A	A	A	H	A	A	A	A	A	A
chr1_1655940_C_T	1	1655940	-	T/C	B	B	B	B	B	B	B	B	B	B	B	B	B	B	B	B	B	B	B	B	B	B	B	B	B	B	B	B	B	B	B	B	B	B	B	B	B	B	A	B	B	H	B	B	B
chr1_16586426_A_C	1	16586426	+	A/C	A	A	A	A	A	A	A	H	A	A	A	A	H	A	A	A	A	A	A	A	A	A	A	A	A	A	A	A	H	A	A	H	A	A	A	A	H	A	A	A	A	A	A	A	A
chr1_16618819_C_T	1	16618819	+	A/G	B	B	B	B	B	B	B	B	B	B	B	B	B	B	B	B	B	B	B	B	B	B	B	B	B	B	B	B	B	B	B	B	B	B	B	B	B	B	B	B	B	B	B	B	B
chr1_16623814_C_T	1	16623814	-	T/C	B	H	H	B	B	B	B	H	B	H	B	H	B	B	H	B	B	A	H	H	B	H	A	B	B	B	H	H	A	H	H	B	H	B	H	B	B	A	B	H	H	H	B	H	B
chr1_16694690_G_T	1	16694690	+	A/C	B	B	B	B	B	B	B	B	B	B	B	B	B	B	B	B	B	B	B	B	B	B	B	H	B	B	B	B	B	B	B	H	B	B	B	B	B	B	B	B	B	B	B	H	B
chr1_16864011_A_G	1	16864011	-	T/C	A	H	A	H	A	U	A	H	A	A	A	H	H	A	A	H	A	B	H	A	A	H	A	H	A	A	H	H	H	H	A	H	B	A	H	B	A	A	A	H	H	A	A	H	A
chr1_16866207_A_G	1	16866207	+	A/G	B	B	H	B	B	U	H	B	B	B	B	B	B	B	A	B	B	B	B	B	B	B	B	B	B	B	B	B	B	B	B	B	B	B	B	B	B	B	H	B	B	B	B	B	B
chr1_16904389_C_T	1	16904389	-	T/C	B	B	B	B	B	B	H	B	B	B	B	B	B	B	H	B	B	B	B	B	B	B	B	B	B	B	B	B	B	B	B	B	B	B	B	B	B	B	H	B	B	B	B	B	B
chr1_16906729_A_C	1	16906729	+	A/C	B	B	H	B	B	U	H	H	B	B	B	B	B	B	H	B	B	B	B	B	B	B	B	B	B	B	B	B	B	B	B	H	B	B	B	B	B	B	H	B	B	B	B	B	B
chr1_1695157_A_G	1	1695157	-	T/C	A	A	H	A	A	A	A	H	A	A	A	A	A	A	H	A	A	A	A	A	A	A	A	H	A	A	A	A	A	A	A	A	A	A	A	A	H	A	A	A	A	A	A	A	A
chr1_16967062_A_G	1	16967062	+	A/G	A	A	A	A	A	A	A	H	A	A	A	A	A	A	A	A	A	A	A	A	A	A	A	A	A	A	A	A	A	A	A	A	A	A	A	A	A	A	A	A	A	A	A	A	A
chr1_16977489_A_G	1	16977489	+	A/G	A	A	A	A	A	A	A	A	A	A	A	A	A	A	A	A	A	A	A	A	A	A	A	H	A	A	A	A	H	A	A	H	A	A	A	A	A	A	A	A	A	A	A	H	A
chr1_17048242_A_G	1	17048242	+	A/G	A	A	A	A	A	A	A	A	A	A	A	A	A	A	A	A	A	A	A	A	A	A	A	H	A	A	A	A	H	A	A	H	A	A	A	A	A	A	A	A	A	A	A	H	A
chr1_17139876_A_G	1	17139876	+	A/G	B	B	A	B	B	B	B	B	B	B	B	B	B	B	B	B	B	B	B	B	B	B	B	B	B	B	B	B	B	B	B	B	B	B	B	B	B	B	B	B	U	B	B	B	B
chr1_17202271_A_G	1	17202271	+	A/G	B	B	B	B	B	B	B	B	B	B	B	B	B	B	B	B	B	B	B	B	B	B	B	B	B	B	B	B	B	B	B	B	B	B	B	B	B	B	B	B	B	B	B	H	B
chr1_17217214_A_G	1	17217214	+	A/G	B	B	B	B	B	B	B	B	B	B	B	B	B	B	B	B	B	B	B	B	B	B	B	B	B	B	B	B	B	B	B	B	B	B	B	B	B	B	B	B	B	B	B	H	B
chr1_17218476_A_G	1	17218476	+	A/G	B	B	B	B	B	B	B	B	B	B	B	B	H	B	B	B	B	B	B	B	B	B	B	B	B	B	B	B	B	B	B	B	B	B	B	B	B	B	B	B	B	B	B	B	B
chr1_17218655_A_G	1	17218655	-	T/C	A	A	A	A	A	A	A	A	A	A	U	A	H	A	A	A	A	A	A	A	U	A	A	A	A	A	A	A	A	A	A	A	A	U	A	A	A	A	A	A	A	A	A	A	A
chr1_1726376_C_T	1	1726376	+	A/G	B	B	H	H	B	H	B	B	B	B	B	B	B	B	B	B	B	B	B	B	B	B	B	H	B	H	B	B	B	H	B	H	H	B	B	B	B	B	H	H	H	B	B	B	B
chr1_17324608_G_T	1	17324608	-	T/G	A	A	A	A	A	A	H	A	A	A	A	A	A	A	H	A	A	A	A	A	A	A	A	A	A	A	A	A	A	A	A	A	A	A	A	A	A	A	A	A	A	A	A	A	A
chr1_17373491_A_G	1	17373491	-	T/C	A	A	A	A	A	A	A	A	U	A	A	A	A	A	A	A	A	A	A	A	A	A	A	A	A	A	A	A	A	A	A	A	A	A	A	A	A	A	A	A	A	A	A	A	A
chr1_17402591_C_T	1	17402591	-	T/C	A	A	A	A	A	A	A	A	A	A	A	A	A	A	A	A	A	A	A	A	A	A	A	A	A	A	A	A	A	A	A	A	A	A	A	A	A	A	H	A	A	A	A	H	A
chr1_17402882_C_T	1	17402882	-	T/C	B	B	B	B	B	B	B	H	B	B	B	B	H	B	H	B	B	B	B	B	B	B	B	B	B	B	B	B	H	B	B	B	B	B	B	B	B	B	B	B	B	B	B	B	B
chr1_17451211_A_G	1	17451211	+	A/G	B	B	B	B	B	B	H	B	B	B	B	B	B	B	B	B	B	B	B	B	B	B	B	H	B	B	B	B	B	B	B	H	B	B	B	B	B	B	H	B	B	B	B	H	B
chr1_17472553_A_G	1	17472553	-	T/C	A	B	B	H	H	B	H	B	H	A	H	A	B	H	B	B	A	B	A	B	H	B	B	H	H	H	B	B	B	A	A	H	B	B	B	B	A	B	B	B	H	A	H	H	H
chr1_17513172_A_G	1	17513172	-	T/C	B	B	B	B	B	B	H	B	B	B	B	B	B	B	H	B	B	B	B	B	B	B	B	B	B	B	B	B	B	B	B	H	B	B	B	B	H	B	H	B	B	B	B	H	B
chr1_17549134_A_G	1	17549134	+	A/G	A	A	H	A	A	A	A	A	A	A	A	A	H	A	A	A	A	A	A	A	A	A	A	A	A	A	A	A	H	A	A	A	A	A	A	A	A	A	A	A	A	A	A	A	A
chr1_17556282_A_G	1	17556282	-	T/C	B	B	H	B	B	B	B	B	B	B	B	B	H	B	B	B	B	B	B	B	B	B	B	B	B	B	B	B	H	B	B	B	B	B	B	B	B	B	B	B	B	B	B	B	B
chr1_17557827_C_T	1	17557827	+	A/G	B	B	B	B	B	B	B	B	B	B	B	B	B	B	B	B	B	B	B	B	B	B	B	B	B	B	B	B	B	B	B	H	B	B	B	B	B	B	B	B	B	B	B	B	B
chr1_1761083_A_C	1	1761083	-	T/G	B	B	B	B	B	B	B	B	B	B	B	B	B	B	U	B	B	B	B	B	B	B	B	B	B	B	B	B	B	B	B	H	B	B	B	B	B	B	H	B	B	B	B	B	B
chr1_1764767_A_G	1	1764767	+	A/G	A	H	A	B	H	A	A	A	A	H	H	H	A	B	A	A	H	H	B	A	A	H	A	H	H	A	A	H	A	A	B	H	B	H	B	A	A	B	H	H	H	A	H	A	H
chr1_17880631_A_G	1	17880631	+	A/G	A	A	A	A	A	U	H	A	A	A	A	A	A	A	H	A	A	A	A	A	A	A	A	A	A	A	A	A	A	A	A	A	A	A	A	A	A	A	A	A	A	A	A	A	A
chr1_17880961_A_G	1	17880961	+	A/G	A	A	A	A	A	A	H	A	A	A	A	A	A	A	H	A	A	A	A	A	A	A	A	A	A	A	A	A	A	A	A	A	A	A	A	A	A	A	A	A	A	A	A	A	A
chr1_17908184_C_T	1	17908184	-	T/C	B	B	B	B	B	B	H	B	B	B	B	B	B	B	A	B	B	B	B	B	B	B	B	H	B	B	B	B	B	B	B	H	B	B	B	B	B	B	B	B	B	B	B	B	B
chr1_17917599_A_G	1	17917599	+	A/G	B	B	B	B	B	B	B	B	B	B	B	B	B	B	B	B	B	B	B	B	B	B	B	B	B	B	B	B	B	B	B	B	B	B	B	B	B	B	B	B	B	B	B	B	B
chr1_17951118_A_C	1	17951118	+	A/C	A	A	A	A	H	U	H	A	A	A	A	A	A	A	H	A	A	A	A	A	A	A	A	A	B	A	A	A	A	A	A	A	A	A	A	A	A	H	A	A	A	A	A	A	A
chr1_17969189_C_T	1	17969189	+	A/G	B	B	H	B	B	B	B	B	B	B	B	B	B	B	B	B	B	B	B	B	B	B	B	B	B	B	B	B	B	B	B	B	B	B	B	B	B	B	B	B	B	B	B	B	B
chr1_18013177_C_T	1	18013177	+	A/G	A	A	H	A	A	A	A	A	A	A	A	A	H	A	A	A	A	A	A	A	A	A	A	A	A	A	A	A	H	A	A	A	A	A	A	A	A	A	A	A	A	A	A	A	A
chr1_18021871_A_G	1	18021871	+	A/G	A	A	H	A	A	A	H	H	A	A	A	A	H	A	H	A	A	A	A	A	A	A	A	H	A	A	A	A	A	A	A	B	A	A	A	A	H	A	A	A	A	A	A	A	A
chr1_18105883_C_T	1	18105883	+	A/G	B	B	B	B	B	B	B	B	B	B	B	B	B	B	B	B	B	B	B	B	B	B	B	B	B	B	B	B	B	B	B	B	B	B	B	B	B	B	B	B	B	B	B	B	B
chr1_18157904_A_G	1	18157904	-	T/C	A	A	H	B	H	A	H	A	A	A	H	H	H	A	H	H	H	A	B	H	H	A	B	H	A	B	A	A	H	H	H	H	H	A	H	H	A	B	A	A	H	A	H	A	B
chr1_18181446_C_T	1	18181446	-	T/C	B	B	H	B	B	B	H	B	B	B	B	B	H	B	A	B	B	B	B	B	B	B	B	B	B	B	B	B	B	B	B	B	B	B	B	B	B	B	B	B	B	B	B	B	B
chr1_18182887_A_C	1	18182887	+	A/C	A	A	U	A	A	A	U	A	A	A	A	A	U	A	H	A	A	A	A	A	A	A	A	A	A	A	A	A	A	A	A	A	A	A	A	A	A	A	A	A	A	A	A	A	A
chr1_18207009_C_T	1	18207009	+	A/G	A	A	A	A	A	A	A	A	A	A	A	A	A	A	A	A	A	A	A	A	A	A	A	A	A	A	A	A	A	A	A	H	A	A	A	A	A	A	A	A	A	A	A	A	A
chr1_18321760_C_T	1	18321760	+	A/G	B	B	B	B	B	B	B	B	B	B	B	B	B	B	B	B	B	B	B	B	B	B	B	B	B	B	B	B	B	B	B	H	B	B	B	B	B	B	B	B	B	B	B	B	B
chr1_18353212_A_G	1	18353212	-	T/C	A	A	H	A	A	A	H	H	A	A	A	A	H	A	H	A	A	A	A	A	A	A	A	A	A	A	A	A	A	A	A	A	A	A	A	A	A	A	H	A	A	A	A	H	A
chr1_1836149_A_G	1	1836149	+	A/G	B	B	H	B	B	B	H	H	B	B	B	B	B	B	A	B	B	B	B	B	B	B	B	H	B	B	B	B	B	B	B	H	B	B	B	B	A	B	B	B	B	B	B	B	B
chr1_18368208_C_T	1	18368208	-	T/C	A	A	A	A	A	A	H	A	A	A	A	A	H	A	H	A	A	A	A	A	A	A	A	A	A	A	A	A	A	A	A	A	A	A	A	A	H	A	A	A	A	A	A	A	A
chr1_18404031_A_G	1	18404031	+	A/G	B	B	B	B	B	B	H	B	B	B	U	B	H	B	H	B	B	B	B	B	B	B	B	B	B	B	B	B	B	B	B	H	B	B	B	B	B	B	H	B	B	B	B	H	B
chr1_18463066_A_G	1	18463066	+	A/G	A	A	H	A	A	A	A	A	A	A	A	A	A	A	A	A	U	A	U	U	A	A	U	A	A	A	A	A	A	A	U	A	A	A	A	A	A	A	A	A	A	A	A	A	A
chr1_18464186_A_G	1	18464186	+	A/G	A	A	A	A	A	A	H	A	A	A	A	A	H	A	H	A	A	A	A	A	A	A	A	A	A	A	A	A	A	A	A	H	A	A	A	A	A	A	A	A	A	A	A	A	A
chr1_18544195_C_T	1	18544195	+	A/G	B	B	A	B	B	B	B	B	B	B	B	B	B	B	B	U	B	U	B	B	B	B	U	B	B	B	U	B	B	B	B	B	U	B	B	U	B	U	B	U	B	B	B	B	B
chr1_18577173_C_T	1	18577173	-	T/C	B	B	B	B	B	B	B	B	B	B	B	B	B	B	B	B	B	B	B	B	B	B	B	B	B	B	B	B	B	B	B	B	B	B	B	B	H	B	B	B	B	B	B	B	B
chr1_18582851_C_T	1	18582851	-	T/C	B	B	B	B	B	B	B	H	B	B	B	B	B	B	B	B	B	B	B	B	B	B	B	B	B	B	B	B	B	B	B	H	B	B	B	B	B	B	B	B	B	B	B	B	B
chr1_18651435_C_T	1	18651435	-	T/C	A	A	H	A	A	A	A	A	A	A	A	A	A	A	A	A	A	A	A	A	A	A	A	H	A	A	A	A	H	A	A	H	A	A	A	A	A	A	H	A	A	A	A	H	A
chr1_18654390_C_T	1	18654390	-	T/C	B	B	H	B	B	B	B	B	B	B	B	B	B	B	H	B	B	B	B	B	B	B	B	B	B	B	B	B	B	B	B	B	B	B	B	B	B	B	B	B	B	B	B	B	B
chr1_1870587_C_T	1	1870587	+	A/G	A	A	A	A	A	A	A	A	A	A	A	A	H	A	A	A	A	A	A	A	A	A	A	A	A	A	A	A	H	A	A	H	A	A	A	A	A	A	A	A	A	A	A	H	A
chr1_18760209_A_G	1	18760209	+	A/G	B	B	B	B	B	B	B	B	B	B	B	B	B	B	B	B	B	B	B	B	B	B	B	B	B	B	B	B	B	B	B	B	B	B	B	B	B	B	H	B	B	B	B	H	B
chr1_18883004_A_C	1	18883004	+	A/C	B	B	B	B	B	B	B	B	B	B	B	B	B	B	A	B	B	B	B	B	B	B	B	B	B	B	B	B	B	B	B	B	B	B	B	B	B	B	B	B	B	B	B	B	B
chr1_18902730_A_G	1	18902730	-	T/C	A	A	A	A	A	A	A	A	A	A	A	A	A	A	H	A	A	A	A	A	A	A	A	A	A	A	A	A	H	A	A	A	A	A	A	A	H	A	H	A	A	A	A	H	A
chr1_18906357_A_G	1	18906357	-	T/C	A	A	A	A	A	A	A	A	A	A	A	A	A	A	A	A	A	A	A	A	A	A	A	A	A	A	A	A	A	A	A	A	A	A	A	A	A	A	H	A	A	A	A	H	A
chr1_18973092_A_C	1	18973092	-	T/G	B	B	H	B	B	B	B	B	B	B	B	B	B	B	B	B	B	B	B	B	B	B	B	B	B	B	B	B	B	B	B	B	B	B	B	B	B	B	H	B	B	B	B	H	B
chr1_19009322_A_G	1	19009322	+	A/G	B	B	B	B	B	U	H	H	B	B	B	B	H	B	H	B	B	B	B	B	B	B	B	H	B	B	B	B	H	B	B	A	B	B	B	B	H	B	H	B	B	B	B	H	B
chr1_1906912_A_C	1	1906912	-	T/G	H	H	H	H	B	H	H	B	B	H	B	B	H	B	H	H	B	B	B	B	B	H	B	H	B	H	H	H	H	H	B	H	H	B	H	H	H	B	H	H	H	B	B	H	B
chr1_19117448_C_T	1	19117448	-	T/C	A	A	A	A	A	A	A	A	A	A	A	A	A	A	H	A	A	A	A	A	A	A	A	A	A	A	A	A	A	A	A	H	A	A	A	A	A	A	A	A	A	A	A	A	A
chr1_19151567_C_T	1	19151567	+	A/G	A	A	A	A	A	A	A	H	A	A	A	A	A	A	H	A	A	A	A	A	A	A	A	H	A	A	A	A	H	A	A	B	A	A	A	A	H	A	H	A	A	A	A	H	A
chr1_1915978_A_G	1	1915978	+	A/G	B	B	H	B	B	B	H	B	B	B	B	B	B	B	H	B	B	B	B	B	B	B	B	H	B	B	B	B	B	B	B	B	B	B	B	B	H	B	B	B	B	B	B	B	B
chr1_19186859_A_G	1	19186859	-	T/C	B	B	B	B	B	B	B	H	B	B	B	B	B	B	B	B	B	B	B	B	B	B	B	H	B	B	B	B	B	B	B	A	B	B	B	B	B	B	B	B	B	B	B	B	B
chr1_19224395_A_G	1	19224395	+	A/G	A	A	H	A	A	U	H	A	A	A	A	A	H	A	H	A	A	A	A	A	A	A	A	H	A	A	A	A	A	A	A	A	A	A	A	A	A	A	A	A	A	A	A	A	A
chr1_19231080_C_T	1	19231080	+	A/G	B	B	B	B	B	B	B	B	B	B	B	B	B	B	B	B	B	B	B	B	B	B	B	B	B	B	B	B	B	B	B	H	B	B	B	B	B	B	B	B	B	B	B	B	B
chr1_19258880_C_T	1	19258880	-	T/C	B	B	B	B	B	B	H	B	B	B	B	B	H	B	B	B	B	B	B	B	B	B	B	H	B	B	B	B	B	B	B	B	B	B	B	B	B	B	B	B	B	B	B	B	B
chr1_1941422_A_C	1	1941422	-	T/G	B	B	B	B	B	H	B	B	U	B	B	B	B	B	B	B	B	B	B	B	B	B	B	B	B	B	B	B	B	B	B	B	B	B	B	B	B	B	H	B	B	B	B	B	B
chr1_19434157_C_T	1	19434157	-	T/C	B	B	A	B	B	B	H	B	B	B	B	B	H	B	A	B	B	B	B	B	B	B	B	H	B	B	B	B	B	B	B	A	B	B	B	B	B	B	B	B	B	B	B	B	B
chr1_19473556_A_G	1	19473556	-	T/C	B	B	B	B	B	B	B	B	B	B	B	B	B	B	B	B	B	B	B	B	B	B	B	B	B	B	B	B	H	B	B	B	B	B	B	B	B	B	H	B	B	B	B	H	B
chr1_19509283_A_G	1	19509283	-	T/C	A	A	H	A	A	H	H	H	A	A	A	A	H	A	B	A	A	A	A	A	A	A	A	H	A	A	A	A	A	A	A	B	A	A	A	A	H	A	A	A	A	A	A	A	A
chr1_19545452_C_T	1	19545452	+	A/G	A	A	A	A	A	B	H	H	B	A	A	A	A	A	A	H	A	H	A	H	H	A	H	A	H	A	A	A	H	A	A	H	A	H	B	A	H	B	A	A	A	H	A	A	A
chr1_19563280_C_T	1	19563280	-	T/C	A	A	A	A	A	B	A	A	A	A	A	A	A	A	A	A	A	A	A	A	A	A	A	A	A	A	A	A	A	A	A	A	A	A	A	A	A	A	A	A	A	A	A	A	A
chr1_19565862_C_T	1	19565862	+	A/G	A	A	A	A	A	A	A	H	A	A	A	A	A	A	A	A	A	A	A	A	A	A	A	A	A	A	A	A	A	A	A	H	A	A	A	A	H	A	H	A	A	A	A	A	A
chr1_19576877_A_G	1	19576877	+	A/G	A	A	A	A	A	A	A	A	A	A	A	A	A	A	A	A	A	A	A	A	A	A	A	A	A	A	A	A	A	A	A	H	A	A	A	A	A	A	H	A	A	A	A	A	A
chr1_19616484_A_G	1	19616484	+	A/G	B	B	B	B	B	U	H	B	B	B	B	B	H	B	H	B	B	B	B	B	B	B	B	B	B	B	B	B	B	B	B	B	B	B	B	B	B	B	B	B	B	B	B	B	B
chr1_19686518_A_G	1	19686518	-	T/C	A	A	H	A	A	U	H	A	A	A	A	A	H	A	B	A	A	A	A	A	A	A	A	H	A	A	A	A	H	A	A	B	A	A	A	A	A	A	A	A	A	A	A	H	A
chr1_196881_C_T	1	196881	+	A/G	B	B	B	B	B	B	B	B	B	B	B	B	H	B	A	B	B	B	B	H	B	B	H	B	B	B	B	B	A	B	B	A	B	B	B	B	A	B	H	B	B	B	B	H	B
chr1_19715227_C_T	1	19715227	-	T/C	H	H	B	A	H	A	A	H	A	H	H	H	A	A	A	A	A	A	A	A	A	A	A	H	U	A	H	B	B	A	A	H	H	A	A	H	H	A	H	H	H	A	A	H	A
chr1_19758132_C_T	1	19758132	+	A/G	H	B	H	B	B	U	A	B	B	B	B	H	H	B	A	B	B	H	B	B	H	H	B	H	B	H	H	B	B	B	B	H	B	H	B	B	H	B	B	H	B	B	B	H	H
chr1_1978372_A_C	1	1978372	+	A/C	B	B	H	B	B	B	B	B	B	B	B	B	B	B	H	B	B	B	B	B	B	B	B	H	B	B	B	B	B	B	B	H	B	B	B	B	B	B	H	B	B	B	B	B	B
chr1_19793242_C_T	1	19793242	-	T/C	A	A	A	A	A	A	A	A	A	A	A	A	A	A	A	A	A	A	A	A	A	A	A	A	A	A	A	A	A	A	A	A	A	A	A	A	A	A	H	A	A	A	A	A	A
chr1_19828192_C_T	1	19828192	+	A/G	B	B	B	B	B	B	B	H	B	B	B	B	B	B	H	B	B	B	B	B	B	B	B	B	B	B	B	B	B	B	B	H	B	B	B	B	B	B	B	B	B	B	B	B	B
chr1_19882962_A_C	1	19882962	-	T/G	A	A	A	A	A	A	A	H	A	A	A	A	A	A	A	A	A	A	A	A	A	A	A	A	A	A	A	A	A	A	A	A	A	A	A	A	A	A	A	A	A	A	A	A	A
chr1_19895748_C_T	1	19895748	-	T/C	A	A	A	A	A	H	B	A	A	A	A	A	H	A	B	A	A	A	A	A	A	A	A	H	A	A	A	A	A	A	A	H	A	A	A	A	A	A	A	A	A	A	A	A	A
chr1_19930494_A_C	1	19930494	+	A/C	A	A	A	A	A	A	H	A	A	A	A	A	H	A	B	A	A	A	A	A	A	A	A	A	A	A	A	A	A	A	A	A	A	A	A	A	A	A	A	A	A	A	A	A	A
chr1_19975589_A_G	1	19975589	+	A/G	B	B	B	B	B	B	H	B	B	B	B	B	H	B	H	B	B	B	B	B	B	B	B	H	B	B	B	B	H	B	B	A	B	B	B	B	H	B	B	B	B	B	B	H	B
chr1_19998477_A_G	1	19998477	-	T/C	A	A	A	A	A	A	H	A	A	A	A	A	H	A	H	A	A	A	A	A	A	A	A	H	A	A	A	A	A	A	A	A	A	A	A	A	A	A	A	A	A	A	A	A	A
chr1_20013004_A_G	1	20013004	-	T/C	A	A	A	A	A	A	H	A	A	A	A	A	H	A	A	A	A	A	A	A	A	A	A	A	A	A	A	A	A	A	A	A	A	A	A	A	A	A	A	A	A	A	A	A	A
chr1_2013068_A_G	1	2013068	+	A/G	B	B	B	B	B	B	B	B	B	B	B	B	B	B	B	B	B	B	B	B	B	B	B	B	B	B	B	B	B	B	B	B	B	B	B	B	B	B	H	B	B	B	B	B	B
chr1_2049117_G_T	1	2049117	-	T/G	A	A	A	A	A	A	A	A	A	A	A	A	A	A	A	A	A	A	A	A	A	A	U	A	A	A	A	A	A	A	A	A	A	A	A	A	A	A	H	A	A	A	A	A	A
chr1_20625147_A_G	1	20625147	-	T/C	A	A	A	A	A	U	H	A	A	A	H	H	H	A	B	A	A	A	A	A	A	H	A	A	A	A	A	A	H	A	A	A	A	A	A	A	A	A	H	A	A	A	A	A	A
chr1_20641842_C_T	1	20641842	-	T/C	A	A	A	A	A	A	A	A	A	A	A	A	A	A	A	A	A	A	A	A	A	A	A	A	A	A	A	A	A	A	A	A	A	A	A	A	A	A	H	A	A	A	A	A	A
chr1_20642990_A_G	1	20642990	+	A/G	H	A	H	A	A	H	A	H	B	B	H	H	H	A	B	B	A	H	A	H	H	H	B	U	A	H	H	A	B	H	H	B	A	A	A	B	B	B	B	H	A	B	A	H	H
chr1_20648785_C_T	1	20648785	+	A/G	B	B	H	B	B	B	B	B	B	B	B	B	H	B	A	H	B	B	B	H	B	B	B	H	B	B	B	B	B	B	B	H	B	B	B	B	B	B	H	B	B	B	B	B	B
chr1_20723234_C_T	1	20723234	+	A/G	A	A	A	A	A	A	A	B	A	A	A	A	A	A	A	A	A	A	A	A	A	A	A	H	A	A	A	A	A	A	A	A	A	A	A	A	A	A	A	A	A	A	A	A	A
chr1_20750265_C_T	1	20750265	+	A/G	B	B	B	B	B	B	H	H	B	B	B	B	B	B	B	B	B	B	B	B	B	B	B	H	B	B	B	B	B	B	B	H	B	B	B	B	B	B	B	B	B	B	B	B	B
chr1_2083858_A_C	1	2083858	+	A/C	A	A	A	A	A	A	A	A	A	A	A	A	A	A	A	A	A	A	A	A	A	A	A	A	A	A	A	A	A	A	A	A	A	A	A	A	A	A	H	A	A	A	A	A	A
chr1_20870639_A_C	1	20870639	-	T/G	B	B	B	B	B	B	H	B	B	B	B	B	B	B	B	B	B	B	B	B	B	B	B	B	B	B	B	B	B	B	B	B	B	B	B	B	B	B	B	B	B	B	B	B	B
chr1_20879274_C_T	1	20879274	-	T/C	B	H	H	B	B	U	B	B	A	H	H	B	B	B	H	B	H	H	B	B	H	H	B	H	H	H	H	H	B	H	H	B	H	H	H	H	H	B	H	H	H	A	B	B	B
chr1_20902008_G_T	1	20902008	+	A/C	B	B	B	B	B	B	B	A	B	B	B	B	B	B	B	B	B	B	B	B	B	B	B	H	B	B	B	B	H	B	B	A	B	B	B	B	B	B	B	B	B	B	B	H	B
chr1_20933816_C_T	1	20933816	+	A/G	H	H	H	H	H	B	B	H	H	H	H	H	B	A	A	B	H	B	H	B	H	H	B	H	H	H	B	B	B	H	H	B	B	H	H	B	H	H	B	B	H	H	H	B	H
chr1_20944785_A_G	1	20944785	-	T/C	B	B	B	H	H	H	H	H	B	H	H	A	H	A	B	B	B	B	H	A	B	B	B	H	H	H	H	B	H	H	A	B	B	B	B	H	B	B	B	H	H	H	H	B	H
chr1_20985372_C_T	1	20985372	+	A/G	B	B	H	B	B	B	B	B	B	B	B	B	B	B	A	B	B	B	B	B	B	B	B	H	B	B	B	B	B	B	B	B	B	B	H	B	B	B	B	B	B	B	B	B	B
chr1_21007656_A_G	1	21007656	+	A/G	A	A	H	A	A	A	H	A	A	A	A	A	A	A	H	A	A	A	A	A	A	A	A	A	A	A	A	A	A	A	A	A	A	A	A	A	A	A	A	A	A	A	A	A	A
chr1_21044474_C_T	1	21044474	-	T/C	B	B	B	B	B	B	B	B	B	B	B	B	B	B	B	B	B	B	B	B	B	B	B	H	B	B	B	B	B	B	B	B	B	B	B	B	B	B	B	B	B	B	B	B	B
chr1_21076865_A_G	1	21076865	+	A/G	A	A	A	A	A	A	A	A	A	A	A	A	A	A	A	A	A	A	A	A	A	A	A	A	A	A	A	A	H	A	A	H	A	A	A	A	H	A	A	A	A	A	A	H	A
chr1_21104634_A_C	1	21104634	+	A/C	H	B	B	H	A	B	B	H	A	H	A	H	B	H	A	B	A	B	B	A	A	H	A	H	H	H	B	H	H	H	A	H	B	A	H	B	H	A	H	B	H	H	H	H	H
chr1_21111153_C_T	1	21111153	-	T/C	B	B	H	B	B	B	B	B	B	B	B	B	B	B	A	B	B	B	B	B	B	B	B	H	B	B	B	B	B	B	B	H	B	B	B	B	B	B	B	B	B	B	B	B	B
chr1_21146880_A_G	1	21146880	+	A/G	H	H	A	H	B	A	H	B	B	H	B	B	H	B	H	A	B	A	B	B	B	H	B	U	B	H	A	H	A	H	B	A	A	B	H	A	H	B	A	A	H	B	B	A	H
chr1_21179164_G_T	1	21179164	+	A/C	B	H	B	H	A	B	B	H	B	H	A	H	B	A	B	B	A	B	H	A	A	H	H	U	A	H	B	H	H	H	A	H	B	A	H	B	A	H	H	B	H	H	A	H	H
chr1_2119583_G_T	1	2119583	-	T/G	B	B	B	B	B	B	B	H	B	B	B	B	H	B	H	B	B	B	B	B	B	B	B	B	B	B	B	B	H	B	B	H	B	B	B	B	A	B	H	B	B	B	B	H	B
chr1_21206468_A_C	1	21206468	+	A/C	B	B	B	B	H	B	H	B	B	B	B	B	B	B	B	B	B	B	B	B	B	B	B	B	B	B	B	B	H	B	B	B	B	B	B	B	B	B	B	B	B	H	B	B	B
chr1_21223815_A_G	1	21223815	-	T/C	B	B	H	B	B	B	B	B	B	B	B	B	B	B	A	B	B	B	B	B	B	B	B	H	B	B	B	B	B	B	B	B	B	B	B	B	B	B	B	B	B	B	B	B	B
chr1_21258195_G_T	1	21258195	+	A/C	H	A	H	H	B	U	H	B	B	H	B	B	H	B	B	A	B	A	H	B	H	H	B	U	B	H	H	H	A	H	B	H	A	B	H	A	H	B	A	H	H	H	H	A	H
chr1_21275562_A_G	1	21275562	-	T/C	B	B	B	H	B	A	H	B	H	B	B	B	A	B	B	A	B	U	B	B	B	B	B	B	U	B	H	B	A	B	B	B	A	U	U	A	B	B	U	H	B	B	B	U	H
chr1_2136674_C_T	1	2136674	-	T/C	A	A	H	A	A	A	H	A	A	A	H	H	A	H	A	A	H	A	H	A	A	H	A	H	A	A	A	A	A	A	A	A	A	H	A	A	A	A	A	A	A	H	A	A	A
chr1_21373487_C_T	1	21373487	-	T/C	A	A	A	A	A	A	H	A	A	A	A	A	H	A	A	A	A	A	A	A	A	A	A	A	A	A	A	A	A	A	A	A	A	A	A	A	A	A	A	A	A	A	A	A	A
chr1_21394971_C_T	1	21394971	+	A/G	A	A	H	A	A	A	A	A	A	A	A	A	A	A	A	A	A	A	A	A	A	A	A	H	A	A	A	A	A	A	A	A	A	A	A	A	A	A	A	A	A	A	A	A	A
chr1_21405071_C_T	1	21405071	-	T/C	B	B	B	B	B	U	H	B	B	B	B	B	A	B	B	U	B	B	B	B	B	B	B	B	B	B	U	B	B	B	B	B	U	B	B	B	B	B	B	U	B	B	B	B	B
chr1_21430574_A_G	1	21430574	-	T/C	A	A	A	A	A	A	A	A	A	A	A	A	A	A	B	A	A	A	A	A	A	A	A	H	A	A	A	A	A	A	A	A	A	A	A	A	A	A	A	A	A	A	A	A	A
chr1_2145603_A_C	1	2145603	-	T/G	B	B	B	B	B	B	B	B	B	B	B	B	B	B	B	B	B	B	B	B	B	B	B	B	B	B	B	B	B	B	B	B	B	B	B	B	H	H	B	B	B	B	B	B	B
chr1_21473096_C_T	1	21473096	-	T/C	A	A	A	H	A	B	A	A	A	A	A	A	A	A	H	H	A	A	A	A	A	A	A	A	A	A	A	A	A	H	A	A	H	A	A	A	A	A	A	A	A	A	A	A	A
chr1_21503298_C_T	1	21503298	+	A/G	H	H	H	H	B	U	H	H	B	H	B	B	H	B	B	H	B	A	B	B	B	H	H	U	B	H	A	H	A	H	B	A	A	B	H	A	H	A	A	A	H	H	B	A	H
chr1_21505077_C_T	1	21505077	+	A/G	A	A	A	A	A	A	A	H	A	A	A	A	A	A	A	A	A	A	A	A	A	A	A	A	A	A	A	A	A	A	A	A	A	A	A	A	A	A	A	A	A	A	A	A	A
chr1_21600956_A_G	1	21600956	-	T/C	A	A	A	A	A	U	H	A	A	A	A	A	H	A	A	A	A	A	A	A	A	A	A	A	A	A	A	A	A	A	A	A	A	A	A	A	A	A	A	A	A	A	A	A	A
chr1_21610516_C_T	1	21610516	-	T/C	A	A	A	A	A	A	A	A	A	A	A	A	A	A	A	A	A	A	A	A	A	A	A	A	A	A	A	A	A	A	A	H	A	A	A	A	H	A	H	A	A	A	A	A	A
chr1_21676342_A_C	1	21676342	-	T/G	B	B	B	B	B	B	B	B	B	B	B	B	B	B	H	B	B	B	B	B	B	B	B	H	B	B	B	B	B	B	B	B	B	B	B	B	B	B	B	B	B	B	B	B	B
chr1_21713586_A_G	1	21713586	-	T/C	A	A	A	A	A	A	A	H	A	A	A	A	A	A	H	A	A	A	A	A	A	A	A	A	A	A	A	A	H	A	A	B	A	A	A	A	H	A	H	A	A	A	A	H	A
chr1_21718827_A_G	1	21718827	-	T/C	B	B	B	B	B	B	B	H	B	B	B	B	B	B	H	B	B	B	B	B	B	B	B	B	B	B	B	B	H	B	B	A	B	B	B	B	H	B	H	B	B	B	B	H	B
chr1_21762270_C_T	1	21762270	-	T/C	B	B	H	B	B	B	B	B	B	B	B	B	B	B	A	B	B	B	B	B	B	B	B	H	B	B	B	B	U	B	B	A	B	B	B	B	B	B	B	B	B	B	B	A	B
chr1_21860087_G_T	1	21860087	+	A/C	A	A	A	A	A	A	H	A	A	A	A	A	H	A	H	A	A	A	A	A	A	A	A	A	A	A	A	A	A	A	A	A	A	A	A	A	A	A	A	A	A	A	A	A	A
chr1_21868647_A_G	1	21868647	-	T/C	A	A	B	A	A	U	H	A	A	A	A	A	B	A	H	A	A	A	A	A	A	A	A	H	A	A	A	A	A	A	A	A	U	A	A	A	A	A	A	A	A	A	A	A	A
chr1_21894243_C_T	1	21894243	+	A/G	A	A	H	A	A	U	H	H	A	A	A	A	H	A	B	A	A	A	A	A	A	A	A	H	A	A	A	A	H	A	A	B	A	A	A	A	H	A	H	A	A	A	A	H	A
chr1_21931422_C_T	1	21931422	-	T/C	A	A	A	A	U	A	A	A	A	A	A	A	A	A	B	A	A	A	A	A	A	A	A	A	A	A	A	A	H	A	A	H	A	A	A	A	A	A	A	A	A	A	A	H	A
chr1_21967275_A_G	1	21967275	-	T/C	A	A	A	A	A	A	A	H	A	A	A	A	A	A	A	A	A	A	A	A	A	A	A	A	A	A	A	A	H	A	A	B	A	A	A	A	H	A	H	A	A	A	A	H	A
chr1_22066956_G_T	1	22066956	+	A/C	A	A	H	A	A	A	H	H	A	A	A	H	H	A	B	A	A	A	A	A	A	A	A	H	A	A	A	A	A	A	A	A	A	A	A	A	H	A	A	A	A	H	A	A	A
chr1_22075765_C_T	1	22075765	-	T/C	A	A	A	A	A	A	A	A	A	A	A	A	A	A	A	A	A	A	A	A	A	A	A	A	A	A	A	A	A	A	A	A	A	A	A	A	A	A	H	A	A	A	A	A	A
chr1_22133457_A_C	1	22133457	+	A/C	B	B	B	B	B	B	B	B	B	B	B	B	B	B	B	B	B	B	B	B	B	B	B	B	B	B	B	B	B	B	B	B	B	B	B	B	B	B	H	B	B	B	B	B	B
chr1_22184356_C_T	1	22184356	+	A/G	A	A	H	A	A	A	A	A	A	A	A	A	A	A	A	A	A	A	A	A	A	A	A	H	A	A	A	A	A	A	A	A	A	A	A	A	A	A	A	A	A	A	A	A	A
chr1_22186509_C_T	1	22186509	-	T/C	B	B	B	B	B	B	B	H	B	B	B	B	B	B	H	B	B	B	B	B	B	B	B	B	B	B	B	B	B	B	B	H	B	B	B	B	H	B	B	B	B	B	B	B	B
chr1_22190393_G_T	1	22190393	-	T/G	B	B	B	B	B	B	B	B	B	B	B	B	B	B	B	B	B	B	B	B	B	B	B	B	B	B	B	B	B	B	B	B	B	B	B	B	H	B	B	B	B	B	B	B	B
chr1_22216753_A_G	1	22216753	-	T/C	B	B	H	B	B	B	B	B	B	B	B	B	B	B	H	B	B	B	B	B	B	B	B	H	B	B	B	B	B	B	B	B	B	B	B	B	B	B	B	B	B	B	B	B	B
chr1_22273966_A_G	1	22273966	-	T/C	A	A	A	A	A	A	A	H	A	A	A	A	A	A	H	A	A	A	A	A	A	A	A	A	A	A	A	A	H	A	A	B	A	A	A	A	H	A	H	A	A	A	A	H	A
chr1_22322441_G_T	1	22322441	-	T/G	A	A	A	A	A	U	H	A	U	A	U	A	H	A	A	A	A	A	A	A	U	A	A	A	U	A	A	A	A	A	U	H	A	A	A	A	A	A	H	A	A	A	A	A	A
chr1_22328219_C_T	1	22328219	-	T/C	B	B	H	B	B	B	B	B	B	B	B	B	B	B	B	B	B	B	B	B	B	B	B	H	B	B	B	B	B	B	B	B	B	B	B	B	B	B	B	B	B	B	B	B	B
chr1_22359683_A_G	1	22359683	-	T/C	A	A	A	A	A	A	A	B	A	A	U	A	A	U	H	A	U	A	U	A	A	A	A	A	A	A	A	A	H	A	U	B	A	U	A	A	H	A	H	A	A	A	A	H	A
chr1_22428538_C_T	1	22428538	+	A/G	A	A	A	A	A	U	H	A	A	A	A	A	A	A	A	A	A	A	A	A	A	A	A	A	A	A	A	A	A	A	A	A	A	A	A	A	A	A	A	A	A	A	A	A	A
chr1_2243289_A_G	1	2243289	+	A/G	A	A	H	A	A	A	A	A	A	A	A	A	A	A	A	A	A	A	A	A	A	A	A	H	A	A	A	A	A	A	A	H	A	A	A	A	A	A	A	A	A	A	A	A	A
chr1_22466694_A_C	1	22466694	-	T/G	A	A	A	A	A	A	A	A	A	A	A	A	A	A	A	A	A	A	A	A	A	A	A	A	A	A	A	A	H	A	A	H	A	A	A	A	A	A	A	A	A	A	A	H	A
chr1_22481214_A_G	1	22481214	+	A/G	A	A	A	A	A	A	A	A	A	A	A	A	A	A	A	A	A	A	A	A	A	A	A	A	A	A	A	A	H	A	A	H	A	A	A	A	A	A	A	A	A	A	A	H	A
chr1_22498675_A_G	1	22498675	+	A/G	A	A	A	A	A	A	A	A	A	A	A	A	A	A	H	A	A	A	A	A	A	A	A	H	A	A	A	A	A	A	A	A	A	A	A	A	A	A	A	A	A	A	A	A	A
chr1_22540675_A_G	1	22540675	-	T/C	B	B	B	B	B	B	B	B	B	H	B	B	B	B	B	B	B	B	B	B	B	B	B	H	B	B	B	B	H	B	B	H	B	B	B	B	B	B	B	B	B	B	B	H	B
chr1_22575141_A_G	1	22575141	+	A/G	H	H	H	H	B	A	A	H	B	H	B	H	A	B	H	A	H	A	B	A	B	H	A	U	B	H	A	H	A	H	B	A	A	B	H	A	H	A	A	A	H	H	B	A	H
chr1_22609084_C_T	1	22609084	-	T/C	A	A	A	A	A	U	H	A	A	A	A	A	A	A	A	A	A	A	A	A	A	A	A	A	A	A	A	A	A	A	A	H	A	A	A	A	A	A	H	A	A	A	A	A	A
chr1_2262939_C_T	1	2262939	-	T/C	A	A	A	A	A	A	A	A	A	A	A	A	A	A	U	A	A	A	A	A	A	A	A	A	A	A	A	A	A	A	A	H	A	A	A	A	A	A	H	A	A	A	A	A	A
chr1_22644187_C_T	1	22644187	-	T/C	B	B	H	B	B	B	B	B	B	B	B	B	B	B	B	B	B	B	B	B	B	B	B	B	B	B	B	B	H	B	B	H	B	B	B	B	B	B	H	B	B	B	B	H	B
chr1_22679750_A_C	1	22679750	-	T/G	A	A	A	A	A	A	A	A	A	A	A	A	H	A	H	A	A	A	A	A	A	A	A	A	A	A	A	A	A	A	A	A	A	A	A	A	A	A	A	A	A	A	A	A	A
chr1_22715654_C_T	1	22715654	-	T/C	B	B	H	B	B	B	H	B	B	B	B	H	B	B	B	B	B	B	B	A	B	B	A	H	B	B	B	B	H	B	B	A	B	B	B	B	B	B	H	B	B	B	B	H	B
chr1_22750062_C_T	1	22750062	+	A/G	A	A	A	A	A	U	H	A	A	A	A	A	A	A	A	A	A	A	A	A	A	A	A	A	A	A	A	A	A	A	A	H	A	A	A	A	A	A	A	A	A	A	A	A	A
chr1_22783490_G_T	1	22783490	+	A/C	B	B	B	B	B	B	B	B	B	B	B	B	B	B	H	B	B	B	B	B	B	B	B	H	B	B	B	B	B	B	B	B	B	B	B	B	B	B	B	B	B	B	B	B	B
chr1_22822369_A_G	1	22822369	+	A/G	A	A	H	A	A	A	A	A	A	A	A	A	A	A	A	A	A	A	A	A	A	A	A	H	A	A	A	A	A	A	A	A	A	A	A	A	H	A	A	A	A	A	A	A	A
chr1_22849187_A_C	1	22849187	+	A/C	B	B	H	B	B	B	B	B	B	H	B	B	B	B	B	B	B	B	B	B	H	B	B	B	B	B	B	H	B	B	H	B	B	H	B	B	B	B	B	B	B	B	B	B	B
chr1_22857939_C_T	1	22857939	-	T/C	B	B	B	B	B	B	H	H	B	B	B	B	H	B	H	B	B	B	B	B	B	B	B	B	B	B	B	B	H	B	B	A	B	B	B	B	B	B	H	B	B	B	B	H	B
chr1_22921027_A_C	1	22921027	+	A/C	B	B	H	B	B	B	B	B	B	B	B	B	B	B	H	B	B	B	B	B	B	B	B	H	B	B	B	B	B	B	B	B	B	B	B	B	H	B	B	B	B	B	B	B	B
chr1_2296184_A_G	1	2296184	-	T/C	B	B	B	B	B	B	A	B	B	B	B	B	B	B	H	B	B	B	B	B	B	B	B	B	B	B	B	B	B	B	B	H	B	B	B	B	B	B	H	B	B	B	B	B	B
chr1_22964178_A_G	1	22964178	+	A/G	B	B	B	B	B	B	B	B	B	B	B	B	B	B	H	B	B	B	B	B	B	B	B	B	B	B	B	B	B	B	B	B	B	B	B	B	H	B	B	B	B	B	B	B	B
chr1_23000434_C_T	1	23000434	-	T/C	A	A	H	A	A	A	A	A	A	A	A	A	A	A	A	A	A	A	A	A	A	A	A	H	A	A	A	A	A	A	A	A	A	A	A	A	A	A	A	A	A	A	A	A	A
chr1_2425051_A_G	1	2425051	-	T/C	A	A	A	A	A	A	A	H	A	A	A	A	H	A	H	A	A	A	A	A	A	A	A	A	A	A	A	A	H	A	A	B	A	A	A	A	H	A	H	H	A	A	A	H	A
chr1_2438051_G_T	1	2438051	-	T/G	A	A	H	A	A	U	H	A	A	A	A	A	A	A	H	A	A	A	A	A	A	A	A	H	A	A	A	A	A	A	A	H	A	A	A	A	A	A	A	A	A	A	A	A	A
chr1_2465455_A_C	1	2465455	-	T/G	B	B	B	B	B	U	H	B	B	B	B	B	B	B	B	B	B	B	B	B	B	B	B	B	B	B	B	B	B	B	B	H	B	B	B	B	B	B	B	B	B	B	B	B	B
chr1_2477665_C_T	1	2477665	-	T/C	A	A	A	A	A	A	A	H	A	A	A	A	H	A	H	A	A	A	A	A	A	A	A	A	A	A	A	A	H	A	A	H	A	A	A	A	H	A	H	A	A	A	A	H	A
chr1_2511205_C_T	1	2511205	-	T/C	B	B	B	B	B	B	B	B	B	B	B	B	H	B	H	B	B	B	B	B	B	B	B	B	B	B	B	B	H	B	B	H	B	B	B	B	B	B	H	B	B	B	B	H	B
chr1_2532098_C_T	1	2532098	+	A/G	B	B	H	B	B	B	H	H	B	B	B	B	H	B	A	B	B	B	B	B	B	B	B	H	B	B	B	B	B	B	B	A	B	B	B	B	H	B	A	B	B	B	B	B	B
chr1_2547257_C_T	1	2547257	-	T/C	A	A	A	A	A	A	A	A	A	A	A	A	A	A	A	A	A	A	A	A	A	A	A	A	A	A	A	A	A	A	A	A	A	A	A	A	A	A	A	A	A	A	A	A	A
chr1_2582787_G_T	1	2582787	-	T/G	A	A	A	A	A	A	A	A	A	A	A	A	A	A	A	A	A	A	A	A	A	A	A	A	A	A	A	A	A	A	A	A	A	A	A	A	A	A	A	A	A	A	A	A	A
chr1_261342_A_G	1	261342	-	T/C	B	B	H	B	B	U	H	A	B	B	B	B	B	B	B	B	B	B	B	B	B	B	B	H	B	B	B	B	B	B	B	B	B	B	B	B	B	B	B	B	B	B	B	B	B
chr1_2624505_G_T	1	2624505	+	A/C	A	A	A	A	A	A	A	A	A	A	A	A	A	A	A	A	A	A	A	A	A	A	A	A	A	A	A	A	H	A	A	A	A	A	A	A	A	A	A	A	A	A	A	H	A
chr1_2653364_A_C	1	2653364	+	A/C	A	A	H	A	A	A	A	H	A	A	A	A	A	A	H	A	A	A	A	A	A	A	A	H	A	A	A	A	A	A	A	A	A	A	A	A	A	A	H	A	A	A	A	A	A
chr1_2685592_A_G	1	2685592	+	A/G	B	B	B	B	B	B	B	B	B	B	B	B	B	B	H	B	B	B	B	B	B	B	B	B	B	B	B	B	H	B	B	B	B	B	B	B	B	B	B	B	B	B	B	H	B
chr1_2690277_A_G	1	2690277	-	T/C	H	H	A	H	A	U	A	A	A	A	A	H	H	A	H	B	A	A	A	B	A	H	A	A	A	A	B	H	B	H	A	A	H	A	A	B	A	A	H	H	A	A	A	B	A
chr1_27655_C_T	1	27655	+	A/G	A	A	A	A	U	A	A	A	A	A	A	A	H	A	H	A	A	A	A	A	A	A	A	A	A	A	A	A	H	A	A	B	A	A	A	A	H	U	H	A	A	A	A	H	A
chr1_2766340_C_T	1	2766340	+	A/G	A	A	A	A	A	A	A	A	U	A	A	A	A	A	A	A	A	A	A	A	A	A	A	A	A	A	A	A	A	A	A	H	A	A	A	A	A	A	H	A	A	A	A	A	A
chr1_2796258_C_T	1	2796258	-	T/C	B	B	H	B	B	B	B	B	B	B	B	B	B	B	A	B	B	B	B	B	B	B	B	H	B	B	B	B	B	B	B	B	B	B	B	B	H	B	B	B	B	B	B	B	B
chr1_2824341_C_T	1	2824341	+	A/G	A	A	H	A	A	A	A	A	A	A	A	A	A	A	B	A	A	A	A	A	A	A	A	H	A	A	A	A	A	A	A	A	A	A	A	A	H	A	A	A	A	A	A	A	A
chr1_2844356_C_T	1	2844356	-	T/C	B	B	B	B	B	B	B	B	B	B	B	B	H	B	B	B	B	B	B	B	B	B	B	B	B	B	B	B	B	B	B	A	B	B	B	B	B	B	H	B	B	B	B	B	B
chr1_2880420_A_G	1	2880420	+	A/G	A	A	A	A	A	U	H	H	A	A	A	A	A	A	A	A	A	A	A	A	A	A	A	A	A	A	A	A	A	A	A	A	A	A	A	A	A	A	A	A	A	A	A	A	A
chr1_2904096_G_T	1	2904096	-	T/G	B	B	B	B	B	B	B	B	B	B	B	B	B	B	B	B	B	B	B	B	B	B	B	B	B	B	B	B	B	B	B	B	B	B	B	B	B	B	H	B	B	B	B	B	B
chr1_2941366_G_T	1	2941366	+	A/C	A	A	A	A	A	A	A	A	A	A	A	A	A	A	B	A	A	A	A	A	A	A	A	A	A	A	A	A	A	A	A	A	A	A	A	A	H	A	H	A	A	A	A	A	A
chr1_2975668_A_G	1	2975668	+	A/G	A	A	A	A	A	A	A	A	A	A	A	A	H	A	A	A	A	A	A	A	A	A	A	A	A	A	A	A	H	A	A	H	A	A	A	A	A	A	A	A	A	A	A	H	A
chr1_2992477_A_G	1	2992477	-	T/C	H	B	H	B	B	B	B	B	B	B	B	B	A	B	B	B	B	B	B	B	B	H	B	U	B	H	H	H	H	H	B	H	B	B	B	H	B	B	H	H	H	B	B	A	B
chr1_3010321_A_C	1	3010321	+	A/C	A	A	A	A	A	A	A	A	A	A	A	A	A	A	A	A	A	A	A	A	A	A	A	A	A	A	A	A	A	A	A	A	A	A	A	A	A	A	H	A	A	A	A	A	A
chr1_301596_A_G	1	301596	+	A/G	A	A	A	A	A	A	A	A	A	A	A	A	H	A	A	A	A	A	A	A	A	A	A	A	A	A	A	A	H	A	A	A	A	A	A	A	H	A	H	A	A	A	A	H	A
chr1_3047360_C_T	1	3047360	-	T/C	B	B	H	B	B	B	B	B	B	B	B	B	B	B	B	B	B	B	B	B	B	B	B	H	B	B	B	B	B	B	B	B	B	B	B	B	B	B	B	B	B	B	B	B	B
chr1_3081200_G_T	1	3081200	+	A/C	B	B	B	B	B	B	B	B	B	B	B	B	B	B	B	B	B	B	B	B	B	B	B	B	B	B	B	B	B	B	B	B	B	B	B	B	B	B	B	B	B	B	B	B	B
chr1_3120443_C_T	1	3120443	+	A/G	A	A	A	A	A	A	A	H	A	A	A	A	A	A	A	A	A	A	A	A	A	A	A	A	A	A	A	A	H	A	U	A	A	A	A	A	A	A	A	A	A	A	A	H	A
chr1_3126878_A_C	1	3126878	-	T/G	B	B	B	B	H	B	H	B	B	B	B	B	B	B	B	B	B	B	B	B	H	B	B	H	B	B	B	H	H	B	B	B	B	B	H	B	B	B	B	B	B	A	B	H	B
chr1_3145799_C_T	1	3145799	+	A/G	A	A	A	A	A	A	A	A	A	A	A	A	A	A	A	A	A	A	A	A	A	A	A	A	A	A	A	A	A	A	A	A	A	A	A	A	A	A	A	A	A	A	A	A	A
chr1_3147694_C_T	1	3147694	-	T/C	A	A	H	A	A	H	H	H	A	A	A	A	A	A	B	A	A	A	A	A	A	A	A	H	A	A	A	A	H	A	A	A	A	A	A	A	H	A	H	A	A	A	A	A	A
chr1_3188815_A_C	1	3188815	-	T/G	H	A	H	H	A	U	H	A	A	A	A	A	B	A	B	B	A	B	A	A	A	H	A	H	A	H	H	H	H	H	A	B	H	A	H	B	H	A	H	B	H	A	A	H	A
chr1_3224471_A_G	1	3224471	-	T/C	B	B	B	B	B	B	B	B	B	B	B	B	H	B	B	B	B	B	B	B	B	B	B	B	B	B	B	B	B	B	B	A	B	B	B	B	B	B	B	B	B	B	B	B	B
chr1_3293743_C_T	1	3293743	-	T/C	H	U	B	U	B	B	H	B	U	A	B	B	A	B	B	U	U	A	U	B	B	U	U	B	B	B	A	H	H	H	B	A	U	B	H	A	B	H	H	A	U	H	B	H	B
chr1_3306534_A_C	1	3306534	-	T/G	B	B	B	B	B	B	B	B	B	B	B	B	B	B	B	B	B	B	B	B	B	B	B	B	B	B	B	B	B	B	B	B	B	B	B	B	B	B	B	B	B	B	B	B	B
chr1_3328583_A_C	1	3328583	+	A/C	B	B	B	B	B	B	B	B	B	B	B	B	B	B	B	B	B	B	B	B	B	B	B	B	B	B	B	B	B	B	B	B	B	B	B	B	B	B	B	B	B	B	B	B	B
chr1_3373891_C_T	1	3373891	+	A/G	B	B	H	B	B	B	B	B	B	B	B	B	B	B	A	B	B	B	B	B	B	B	B	H	B	B	B	B	H	B	B	H	B	B	B	B	H	B	B	B	B	B	B	H	B
chr1_3402236_A_G	1	3402236	-	T/C	A	A	A	A	A	A	A	A	A	A	A	A	H	A	A	A	A	A	A	A	A	A	A	A	A	A	A	A	A	A	A	H	A	A	A	A	A	A	A	A	A	A	A	A	A
chr1_340893_C_T	1	340893	-	T/C	B	B	H	B	B	B	B	H	B	B	B	B	B	B	B	B	B	B	B	B	B	B	B	H	B	B	B	B	B	B	B	B	B	B	B	B	B	B	B	B	B	B	B	B	B
chr1_3434841_A_G	1	3434841	+	A/G	A	A	A	A	A	A	A	A	A	A	A	A	B	A	A	A	A	A	A	A	A	A	A	A	A	A	A	A	A	A	A	H	A	A	A	A	A	A	A	A	A	A	A	A	A
chr1_3456810_A_G	1	3456810	+	A/G	B	B	B	B	B	B	B	B	B	B	B	B	B	B	A	B	B	B	B	B	B	B	B	B	B	B	B	B	B	B	B	H	B	B	B	B	H	B	H	B	B	B	B	B	B
chr1_3477330_C_T	1	3477330	+	A/G	B	B	H	B	B	B	H	B	B	B	B	B	H	B	H	B	B	B	B	B	B	B	B	H	B	B	B	B	H	B	B	A	B	B	B	B	B	B	H	B	B	B	B	H	B
chr1_3509301_A_C	1	3509301	+	A/C	A	A	H	A	A	A	A	H	A	A	A	A	H	A	B	A	A	A	A	A	A	A	A	H	A	A	A	A	H	A	A	B	A	A	A	A	H	A	A	A	A	A	A	H	A
chr1_3581101_A_G	1	3581101	+	A/G	A	A	A	A	A	A	A	H	A	A	A	A	A	A	A	A	A	A	A	A	A	A	A	A	A	A	A	A	A	A	A	A	A	A	A	A	A	A	H	A	A	A	A	A	A
chr1_3591346_A_G	1	3591346	-	T/C	B	B	B	B	B	B	B	H	B	B	B	B	B	B	H	B	B	B	B	B	B	B	B	B	B	B	B	B	B	B	B	H	B	B	B	B	B	B	H	B	B	B	B	B	B
chr1_3631408_C_T	1	3631408	+	A/G	A	A	A	A	A	A	A	A	A	A	A	A	H	A	A	A	A	A	A	A	A	A	A	A	A	A	A	A	A	A	A	H	A	A	A	A	A	A	A	A	A	A	A	A	A
chr1_3654499_A_G	1	3654499	+	A/G	B	B	B	B	H	B	B	H	H	H	H	B	B	H	B	B	H	B	H	B	B	H	B	H	B	B	B	B	B	B	H	H	B	H	H	B	B	B	B	B	B	H	B	B	B
chr1_3691115_A_G	1	3691115	+	A/G	A	A	A	H	A	H	H	A	A	A	A	A	H	A	A	H	A	A	A	A	A	H	A	A	A	A	A	A	H	A	A	A	H	A	A	A	A	A	A	A	A	B	A	A	A
chr1_373564_A_G	1	373564	-	T/C	B	B	B	B	B	B	B	B	B	B	B	B	H	B	H	B	B	B	B	B	B	B	B	B	B	B	B	B	B	B	B	H	B	B	B	B	H	B	H	B	B	B	B	B	B
chr1_3759142_C_T	1	3759142	+	A/G	B	B	H	B	B	B	B	B	B	B	B	B	H	B	H	B	B	B	B	B	B	B	B	H	B	B	B	B	H	B	B	H	B	B	B	B	B	B	B	B	B	B	B	H	B
chr1_3774934_C_T	1	3774934	-	T/C	A	A	A	A	A	U	H	A	A	A	A	A	A	A	A	A	A	A	A	A	A	A	A	A	A	A	A	A	A	A	A	A	A	A	A	A	A	A	A	A	A	A	A	A	A
chr1_3797506_C_T	1	3797506	+	A/G	B	B	H	B	B	B	B	B	B	B	B	B	B	B	B	B	B	B	B	B	B	B	B	H	B	B	B	B	H	B	B	H	B	B	B	B	B	B	H	B	B	B	B	H	B
chr1_380881_A_G	1	380881	-	T/C	A	A	A	A	A	A	A	A	A	A	A	A	H	A	A	A	A	A	A	A	A	A	A	A	A	A	A	A	A	A	A	H	A	A	A	A	H	A	A	A	A	A	A	A	A
chr1_3831340_A_G	1	3831340	-	T/C	A	A	H	H	A	A	A	H	A	A	A	A	H	A	B	A	A	A	A	H	A	A	B	H	A	A	H	A	H	A	A	B	H	A	A	H	H	A	H	A	A	A	A	H	A
chr1_3901308_C_T	1	3901308	-	T/C	B	B	B	B	B	B	B	B	B	B	B	B	B	B	H	B	B	B	B	B	B	B	B	B	B	B	B	B	B	B	B	B	B	B	B	B	B	B	B	B	B	B	B	B	B
chr1_3912644_A_G	1	3912644	+	A/G	H	B	H	B	B	U	A	H	B	B	B	B	B	B	H	B	B	H	B	B	B	B	B	H	B	B	B	B	H	B	B	H	B	B	H	B	H	B	B	B	B	H	B	A	B
chr1_3939437_C_T	1	3939437	+	A/G	H	H	H	H	H	H	B	B	B	H	B	H	B	B	H	H	H	B	H	H	B	H	A	U	H	H	B	B	B	B	B	B	H	B	B	H	B	A	B	A	H	B	B	H	B
chr1_3973232_A_G	1	3973232	-	T/C	B	B	B	B	B	B	B	B	B	B	B	B	H	B	H	B	B	B	B	B	B	B	B	B	B	B	B	B	B	B	B	H	B	B	B	B	B	B	H	B	B	B	B	B	B
chr1_4037365_A_C	1	4037365	-	T/G	A	A	A	A	A	A	A	A	A	A	A	A	H	A	A	A	A	A	A	A	A	A	A	A	A	A	A	A	A	A	A	H	A	A	A	A	A	A	H	A	A	A	A	A	A
chr1_404955_C_T	1	404955	-	T/C	A	A	A	A	A	A	A	H	A	A	A	A	A	A	A	A	A	A	A	A	A	A	A	A	A	A	A	A	A	A	A	A	A	A	A	A	A	A	A	A	A	A	A	A	A
chr1_4065334_C_T	1	4065334	-	T/C	A	A	A	A	A	A	A	A	A	A	A	A	H	A	A	A	A	A	A	A	A	A	A	A	A	A	A	A	A	A	A	H	A	A	A	A	A	A	H	A	A	A	A	A	A
chr1_4080597_A_G	1	4080597	-	T/C	A	A	A	A	A	A	A	A	A	A	A	A	H	A	A	A	A	A	A	A	A	A	A	A	A	A	A	A	A	A	A	H	A	A	A	A	A	A	H	A	A	A	A	A	A
chr1_4115621_A_C	1	4115621	+	A/C	H	B	H	B	B	U	H	B	B	B	B	B	B	B	B	B	B	B	B	B	B	B	B	H	B	H	B	B	B	H	B	B	B	B	B	B	B	B	H	B	H	B	B	H	B
chr1_4115697_G_T	1	4115697	+	A/C	A	A	A	A	A	A	H	A	A	A	A	A	A	A	H	A	A	A	A	A	A	A	A	A	A	A	A	A	A	A	A	H	A	A	A	A	H	A	A	A	A	A	A	A	A
chr1_4153036_C_T	1	4153036	-	T/C	B	B	B	B	B	B	B	B	B	B	B	B	B	B	B	B	B	B	B	B	B	B	B	B	B	B	B	B	B	B	B	B	B	B	B	B	B	B	B	B	B	B	B	B	B
chr1_4189252_C_T	1	4189252	-	T/C	B	B	H	B	B	B	B	B	B	B	B	B	H	B	B	B	B	B	B	B	B	B	B	H	B	B	B	B	H	B	B	H	B	B	B	B	B	B	H	B	B	B	B	H	B
chr1_4217401_A_G	1	4217401	+	A/G	B	B	B	B	B	B	B	B	B	B	B	B	H	B	H	B	B	B	B	B	B	B	B	B	B	B	B	B	B	B	B	H	B	B	B	B	H	B	H	B	B	B	B	B	B
chr1_4244591_A_G	1	4244591	+	A/G	B	B	H	B	B	B	B	B	B	B	B	B	B	B	B	B	B	B	B	B	B	B	B	H	B	B	B	B	H	B	B	B	B	B	B	B	B	B	B	B	B	B	B	H	B
chr1_4328972_G_T	1	4328972	-	T/G	B	B	H	B	B	B	H	B	B	B	B	B	H	B	H	B	B	B	B	B	B	B	B	H	B	B	B	B	H	B	B	H	B	B	B	B	H	B	H	B	B	B	B	H	B
chr1_4363169_C_T	1	4363169	-	T/C	A	A	H	A	A	A	A	A	A	A	A	A	A	A	A	A	A	A	A	A	A	A	A	H	A	A	A	A	H	A	A	H	A	A	A	A	A	A	A	A	A	A	A	H	A
chr1_4372397_G_T	1	4372397	+	A/C	B	B	B	B	B	B	B	B	B	B	B	B	B	B	B	B	B	B	B	B	B	B	B	B	B	B	B	B	B	B	B	H	B	B	B	B	B	B	B	B	B	B	B	B	B
chr1_4436801_A_G	1	4436801	-	T/C	B	B	B	B	B	U	H	B	B	B	B	B	B	B	H	B	B	B	B	B	B	B	B	B	B	B	B	B	B	B	B	B	B	B	B	B	B	B	B	B	B	B	B	B	B
chr1_4450776_A_G	1	4450776	+	A/G	A	A	A	A	A	A	A	A	A	A	A	A	A	A	A	A	A	A	A	A	A	A	A	A	A	A	A	A	A	A	A	A	A	A	A	A	A	A	A	A	A	A	A	A	A
chr1_4472344_C_T	1	4472344	-	T/C	B	B	H	B	B	B	B	H	B	B	B	B	B	B	B	B	B	B	B	B	B	B	B	H	B	B	B	B	H	B	B	B	B	B	B	B	B	B	B	B	B	B	B	H	B
chr1_4507532_C_T	1	4507532	-	T/C	A	A	H	A	A	A	A	H	A	A	A	A	A	A	A	A	A	A	A	A	A	A	A	H	A	A	A	A	H	A	A	A	A	A	A	A	A	A	A	A	A	A	A	H	A
chr1_4526701_C_T	1	4526701	-	T/C	A	A	H	A	A	A	A	H	A	A	A	A	B	A	B	A	A	A	A	A	A	A	A	H	A	A	A	A	H	A	A	H	A	A	A	A	H	A	H	A	A	A	A	H	A
chr1_4542269_A_G	1	4542269	-	T/C	B	B	B	B	B	B	B	B	B	B	B	B	H	B	H	B	B	B	B	B	B	B	B	B	B	B	B	B	B	B	B	H	B	B	H	B	H	B	H	B	B	B	B	B	B
chr1_4576447_A_G	1	4576447	+	A/G	B	A	B	A	A	U	H	H	H	A	A	H	B	A	H	A	A	A	H	A	A	A	A	H	B	A	A	A	B	A	H	H	A	A	H	A	H	A	H	B	A	H	A	B	A
chr1_4613154_C_T	1	4613154	-	T/C	A	A	H	A	A	A	A	H	A	A	A	A	H	A	H	A	A	A	A	A	A	A	A	H	A	A	A	A	H	A	A	H	A	A	A	A	H	A	H	A	A	A	A	H	A
chr1_4651426_G_T	1	4651426	+	A/C	A	A	A	A	A	A	H	A	A	A	A	H	A	A	H	A	A	A	A	A	A	A	A	H	H	A	A	H	H	A	A	H	A	A	A	A	A	A	A	A	A	A	A	H	A
chr1_4682493_G_T	1	4682493	+	A/C	B	B	B	B	B	B	B	B	B	B	B	B	B	B	B	B	B	B	B	B	B	B	B	H	B	B	B	B	H	B	B	B	B	B	B	B	B	B	B	B	B	B	B	H	B
chr1_4720796_A_C	1	4720796	+	A/C	B	B	B	B	B	B	B	B	B	B	B	B	H	B	H	B	B	B	B	B	B	B	B	B	B	B	B	B	B	B	B	H	B	B	B	B	H	B	H	B	B	B	B	B	B
chr1_4758051_G_T	1	4758051	+	A/C	B	B	B	B	B	H	H	B	B	B	B	B	H	B	H	H	B	B	B	A	B	B	A	H	B	B	H	H	H	B	B	B	B	B	B	H	A	A	B	H	B	B	B	H	B
chr1_4793462_G_T	1	4793462	-	T/G	A	A	A	A	A	A	A	A	A	A	A	A	A	A	A	A	A	A	A	A	A	A	A	A	A	A	A	A	A	A	A	A	A	A	A	A	A	A	A	A	A	A	A	A	A
chr1_482242_A_G	1	482242	-	T/C	A	A	A	H	A	H	A	A	A	A	A	A	A	A	H	A	A	A	A	A	A	A	A	A	A	A	H	A	U	A	A	A	H	A	A	H	H	A	A	H	A	A	A	U	A
chr1_4849070_C_T	1	4849070	-	T/C	A	A	A	A	A	A	H	A	A	A	A	A	H	A	B	A	A	A	A	A	A	A	A	A	A	A	A	A	A	A	A	H	A	A	A	A	A	A	H	A	A	A	A	A	A
chr1_4865597_A_G	1	4865597	-	T/C	B	B	U	B	B	B	B	B	B	B	B	B	A	B	A	U	B	U	B	B	B	B	B	H	B	B	U	B	A	B	B	A	B	B	B	U	H	B	A	U	B	B	B	A	B
chr1_4899311_C_T	1	4899311	+	A/G	H	H	H	H	B	A	A	B	B	H	B	H	A	B	A	A	B	A	B	B	B	H	B	H	H	H	A	A	A	H	B	A	H	B	H	A	H	B	A	A	H	U	B	A	B
chr1_4934163_C_T	1	4934163	-	T/C	B	B	B	B	B	U	H	B	B	B	B	B	B	B	B	B	B	H	B	B	B	B	B	B	B	B	B	B	B	B	B	B	B	B	H	B	H	B	B	B	B	B	B	B	B
chr1_496453_C_T	1	496453	+	A/G	B	B	H	B	H	B	B	B	B	B	B	B	H	B	A	B	B	A	B	B	B	B	B	U	B	B	B	B	H	B	B	A	B	B	B	B	A	U	H	B	B	B	B	H	B
chr1_4986870_C_T	1	4986870	+	A/G	A	A	A	A	A	A	H	A	A	A	A	H	A	A	A	A	A	A	A	H	A	A	H	A	H	A	A	H	H	A	A	A	A	A	A	A	H	A	A	A	A	A	A	A	A
chr1_5042215_A_G	1	5042215	+	A/G	B	B	B	B	B	B	B	B	B	B	B	B	B	B	B	B	B	B	B	B	B	B	B	B	B	B	B	B	B	B	B	B	B	B	B	B	B	B	B	B	B	B	B	B	B
chr1_5060409_C_T	1	5060409	+	A/G	A	A	A	A	A	U	H	A	A	A	A	A	A	A	A	A	A	A	A	A	A	A	A	A	A	A	A	A	A	A	A	A	A	A	A	A	A	A	A	A	A	A	A	A	A
chr1_5121140_G_T	1	5121140	-	T/G	A	A	A	A	A	A	A	A	A	A	A	A	A	A	A	A	A	A	A	A	A	A	A	A	A	A	A	A	A	A	A	A	A	A	A	A	A	A	A	A	A	A	A	A	A
chr1_5140666_C_T	1	5140666	-	T/C	B	B	B	B	B	B	B	B	H	B	H	H	B	B	B	B	B	B	B	B	B	B	B	H	B	B	B	B	H	B	B	H	B	B	B	B	H	B	B	B	B	B	B	H	B
chr1_5144587_A_G	1	5144587	+	A/G	B	B	B	H	B	B	H	B	B	B	B	B	H	B	A	H	B	A	B	B	B	B	B	H	B	B	B	B	H	B	B	A	H	B	H	B	H	B	H	H	B	B	B	H	B
chr1_518154_C_T	1	518154	-	T/C	B	B	H	B	B	B	B	H	B	B	B	B	B	B	B	B	B	B	B	B	B	B	B	H	B	B	B	H	B	H	B	B	B	B	B	B	B	B	B	B	B	B	B	B	B
chr1_5213775_C_T	1	5213775	-	T/C	B	B	B	B	B	U	H	B	B	B	B	B	B	B	B	B	B	B	B	B	B	B	B	B	B	B	B	B	B	B	B	B	B	B	B	B	H	B	B	B	B	B	B	B	B
chr1_5295802_C_T	1	5295802	-	T/C	B	B	B	B	B	B	B	B	B	B	B	B	B	B	B	B	B	B	B	B	B	B	B	B	B	B	B	B	B	B	B	B	B	B	B	B	B	B	B	B	B	B	B	B	B
chr1_53639_C_T	1	53639	+	A/G	B	B	B	B	B	B	B	B	B	B	B	B	H	B	B	B	B	B	B	B	B	B	B	B	B	B	B	B	H	B	B	A	B	B	B	B	H	B	H	B	B	B	B	H	B
chr1_5371051_C_T	1	5371051	-	T/C	B	B	B	H	B	H	H	B	B	B	B	B	B	B	B	B	B	B	B	B	B	B	B	B	B	B	H	B	B	B	B	B	H	B	B	H	B	B	B	H	B	B	B	B	B
chr1_5399768_C_T	1	5399768	-	T/C	A	A	A	A	A	A	A	H	A	A	A	A	A	A	A	A	A	A	A	A	A	A	A	A	A	A	A	A	A	A	A	A	A	A	A	A	A	A	A	A	A	A	A	A	A
chr1_542829_A_C	1	542829	+	A/C	B	B	B	B	B	B	B	H	B	B	B	B	B	B	B	B	B	B	B	B	B	B	B	B	B	B	B	B	B	B	B	H	B	B	B	B	H	B	B	B	B	B	B	B	B
chr1_5433796_C_T	1	5433796	+	A/G	A	A	H	A	A	A	A	H	A	A	A	A	A	A	A	A	A	A	A	A	A	A	A	A	A	A	A	A	A	A	A	A	A	A	A	A	A	A	A	A	A	A	A	A	A
chr1_551026_A_G	1	551026	+	A/G	B	B	B	B	B	B	B	B	U	B	U	B	H	B	B	B	B	B	U	U	B	B	B	B	B	B	B	B	H	B	B	A	B	B	B	B	H	B	H	B	B	B	B	H	B
chr1_5540305_A_G	1	5540305	-	T/C	B	B	H	B	B	B	B	H	B	B	B	B	B	B	B	B	B	B	B	B	B	B	B	B	B	B	B	B	B	B	B	B	B	B	B	B	B	B	B	B	B	B	B	B	B
chr1_5577208_C_T	1	5577208	-	T/C	B	B	H	B	B	B	H	H	B	B	B	B	B	B	B	B	B	B	B	H	B	B	B	B	B	B	B	B	B	B	B	B	B	B	B	B	B	B	B	B	B	B	B	B	B
chr1_5612001_G_T	1	5612001	+	A/C	B	B	B	B	B	B	H	B	B	B	B	B	B	B	B	B	B	B	B	B	B	B	B	B	B	B	B	B	B	B	B	B	B	B	B	B	B	B	B	B	B	B	B	B	B
chr1_5649071_G_T	1	5649071	+	A/C	A	A	A	A	A	A	A	A	A	A	A	A	H	A	B	A	A	A	A	A	A	A	A	A	A	A	A	A	A	A	A	H	A	A	A	A	A	A	H	A	A	A	A	A	A
chr1_5754629_C_T	1	5754629	+	A/G	B	B	B	B	B	B	H	B	B	B	B	B	H	B	H	B	B	B	B	B	B	B	B	B	B	B	B	B	B	B	B	H	B	B	B	B	B	B	H	B	B	B	B	B	B
chr1_5755006_A_G	1	5755006	+	A/G	A	H	B	H	A	H	A	H	A	A	A	A	H	A	A	H	A	A	A	H	A	A	A	H	A	H	H	H	A	H	A	A	H	A	A	A	A	A	H	H	H	A	A	A	A
chr1_5766532_A_G	1	5766532	-	T/C	A	A	A	A	A	A	H	H	A	A	A	A	A	A	A	A	A	A	A	A	A	A	A	A	A	A	H	A	H	A	A	A	A	A	A	U	A	A	A	U	A	A	A	A	A
chr1_5829143_A_G	1	5829143	-	T/C	A	A	A	A	A	A	H	A	A	A	A	A	A	A	A	A	A	A	A	A	A	A	A	A	A	A	A	A	A	A	A	A	A	A	A	A	H	A	A	A	A	A	A	A	A
chr1_586987_C_T	1	586987	-	T/C	B	B	H	B	B	B	B	B	B	B	B	B	B	B	B	B	B	B	B	B	B	B	B	H	B	B	H	B	B	B	B	B	B	B	B	B	B	B	B	B	B	B	B	B	B
chr1_5898296_A_G	1	5898296	-	T/C	B	B	B	B	B	B	B	B	B	B	B	B	B	B	H	B	U	B	U	B	U	B	B	H	B	B	B	B	H	B	B	H	B	U	B	B	B	B	B	B	B	B	B	H	B
chr1_5906790_A_C	1	5906790	+	A/C	B	B	B	B	B	B	H	B	B	B	B	B	B	B	B	B	B	B	B	B	B	B	B	B	B	B	B	B	B	B	B	B	B	B	B	B	B	B	B	B	B	B	B	B	B
chr1_5973457_C_T	1	5973457	-	T/C	B	B	B	B	B	B	B	H	B	B	B	B	B	B	H	B	B	B	B	B	B	B	B	H	B	B	B	B	H	B	B	A	B	B	B	B	H	B	H	B	B	B	B	H	B
chr1_6074809_G_T	1	6074809	-	T/G	A	A	A	A	A	A	A	A	A	A	A	A	A	A	A	A	A	A	A	A	A	A	A	H	A	A	A	A	H	A	A	H	A	A	A	A	H	A	A	A	A	A	A	H	A
chr1_6083020_A_C	1	6083020	+	A/C	B	B	B	B	B	B	B	H	B	B	B	B	B	B	B	B	B	B	B	B	B	B	B	B	B	B	B	B	B	B	B	B	B	B	B	B	B	B	B	B	B	B	B	B	B
chr1_6109262_A_G	1	6109262	+	A/G	A	A	A	A	A	A	H	A	A	A	A	A	H	A	A	A	A	A	A	A	A	A	A	A	A	A	A	A	A	A	A	H	A	A	A	A	A	A	A	A	A	A	A	A	A
chr1_61191_C_T	1	61191	-	T/C	B	B	H	B	B	B	B	H	B	B	B	B	B	B	B	B	B	B	B	B	B	B	B	H	B	B	B	B	B	B	B	B	B	B	B	B	B	B	B	B	B	B	B	B	B
chr1_6142886_C_T	1	6142886	-	T/C	A	A	H	A	A	A	A	A	A	A	A	A	H	A	H	A	A	A	A	A	A	A	A	A	A	A	A	A	A	A	A	H	A	A	A	A	A	A	H	A	A	A	A	A	A
chr1_6214249_A_G	1	6214249	-	T/C	B	B	B	B	B	B	B	B	B	B	B	B	B	B	B	B	B	B	B	B	B	B	B	H	B	B	B	B	H	B	B	B	B	B	B	B	H	B	B	B	B	B	B	H	B
chr1_6218393_C_T	1	6218393	-	T/C	A	A	A	A	A	A	H	A	A	A	A	A	A	A	A	A	A	A	A	A	A	A	A	A	A	A	A	A	A	A	A	A	A	A	A	A	A	A	A	A	A	A	A	A	A
chr1_625863_C_T	1	625863	+	A/G	A	A	A	A	A	A	A	H	A	A	A	A	A	A	A	A	A	A	A	A	A	A	A	A	A	A	A	A	A	A	A	A	A	A	A	A	A	A	A	A	A	A	A	A	A
chr1_6298545_A_G	1	6298545	+	A/G	A	A	A	A	A	A	A	H	A	A	A	A	A	A	B	A	A	A	A	A	A	A	A	A	A	A	A	A	A	A	A	H	A	A	A	A	A	A	A	A	A	A	A	A	A
chr1_6322315_A_G	1	6322315	-	T/C	H	H	H	H	H	H	H	H	H	H	H	H	H	B	B	B	B	H	H	H	H	H	B	H	H	H	H	B	B	H	B	H	H	H	H	H	B	H	H	H	H	H	H	B	B
chr1_6359505_A_C	1	6359505	+	A/C	A	A	A	A	A	A	H	A	A	A	A	A	A	A	A	A	A	A	A	A	A	A	A	A	A	A	A	A	A	A	A	A	A	A	A	A	A	A	A	A	A	A	A	A	A
chr1_6366603_A_G	1	6366603	-	T/C	B	B	B	B	B	B	H	B	B	B	B	B	H	B	B	B	B	B	B	B	B	B	B	B	B	B	B	B	B	B	B	H	B	B	B	B	B	B	H	B	B	B	B	B	B
chr1_6394661_A_C	1	6394661	+	A/C	B	H	B	H	H	U	B	B	A	B	H	B	H	A	B	A	A	B	B	B	H	B	B	B	B	H	H	H	B	A	A	B	H	B	B	H	H	B	H	H	H	B	H	B	H
chr1_6433498_C_T	1	6433498	-	T/C	A	A	A	A	A	A	A	A	A	A	A	A	A	A	A	A	A	A	A	A	A	A	A	A	A	A	A	A	A	A	A	H	A	A	A	A	A	A	H	A	A	A	A	A	A
chr1_6466156_A_C	1	6466156	+	A/C	B	B	B	B	B	U	H	H	B	B	B	B	B	B	B	B	B	B	B	B	B	B	B	B	B	B	B	B	B	B	B	H	B	B	B	B	B	B	B	B	B	B	B	B	B
chr1_6515981_A_C	1	6515981	+	A/C	A	A	A	A	A	A	H	H	A	A	A	A	H	A	A	A	A	A	A	A	A	A	A	H	A	A	A	A	H	A	A	H	A	A	A	A	H	A	H	A	A	A	A	H	A
chr1_658493_A_G	1	658493	-	T/C	A	A	A	A	A	A	A	A	A	A	A	A	H	A	A	A	A	A	A	A	A	A	A	A	A	A	A	A	H	A	A	B	A	A	A	A	H	A	H	A	A	A	A	H	A
chr1_6612179_A_G	1	6612179	+	A/G	H	H	H	B	B	U	H	H	B	H	B	B	B	B	A	B	B	A	B	B	B	B	B	H	B	B	H	B	H	H	B	B	B	B	H	H	H	B	H	H	B	B	B	A	B
chr1_6673914_C_T	1	6673914	-	T/C	B	B	H	B	B	B	H	B	B	B	B	B	B	B	H	B	B	B	B	B	B	B	B	B	B	B	B	B	B	B	B	B	B	B	B	B	B	B	B	B	B	B	B	B	B
chr1_6715047_A_G	1	6715047	-	T/C	B	B	H	B	B	B	B	H	B	B	B	H	B	U	H	B	B	B	B	A	B	B	A	H	A	B	B	B	H	B	B	B	B	B	B	B	A	B	B	B	B	B	B	H	B
chr1_6737530_A_G	1	6737530	-	T/C	B	B	B	B	B	B	B	B	B	B	B	B	B	B	H	U	B	B	B	B	B	B	B	B	B	B	B	B	B	B	B	H	B	B	B	B	B	B	B	B	B	B	B	B	B
chr1_6751978_A_G	1	6751978	+	A/G	A	A	A	A	A	A	A	A	A	A	A	A	H	A	A	A	A	A	A	A	A	A	A	A	A	A	A	A	A	A	A	A	A	A	A	A	A	A	A	A	A	A	A	A	A
chr1_6787182_C_T	1	6787182	+	A/G	B	B	H	B	B	B	B	H	B	B	B	B	B	B	H	B	B	B	B	B	B	B	B	B	B	B	B	B	B	B	B	B	B	B	B	B	B	B	B	B	B	B	B	B	B
chr1_6829041_A_G	1	6829041	+	A/G	A	A	A	A	A	A	A	A	A	A	A	A	A	A	A	A	A	A	A	A	A	A	A	H	A	A	A	A	H	A	A	A	A	A	A	A	A	A	A	A	A	A	A	H	A
chr1_6864170_C_T	1	6864170	-	T/C	A	A	A	A	A	A	A	A	A	A	A	A	A	A	A	A	A	A	A	A	A	A	A	H	A	A	A	A	H	A	A	A	A	A	A	A	H	A	A	A	A	A	A	H	A
chr1_6897691_A_G	1	6897691	-	T/C	B	B	B	B	B	B	H	B	B	B	B	B	H	B	H	B	B	B	B	B	B	B	B	B	B	B	B	B	B	B	B	A	B	B	B	B	B	B	H	B	B	B	B	B	B
chr1_690894_G_T	1	690894	-	T/G	H	H	H	H	A	H	H	H	A	H	A	H	H	A	H	H	A	H	A	A	A	H	A	H	A	A	B	H	H	A	A	B	H	A	H	B	B	A	B	H	A	A	A	B	A
chr1_6966305_C_T	1	6966305	+	A/G	B	B	B	B	B	B	B	B	B	B	B	B	H	B	B	B	B	B	B	B	B	B	B	B	B	B	B	B	B	B	B	H	B	B	B	B	B	B	H	B	B	B	B	B	B
chr1_6994761_A_G	1	6994761	+	A/G	B	B	H	B	B	B	B	H	B	B	B	B	B	B	H	B	B	B	B	B	B	B	H	H	B	B	B	B	H	B	B	B	B	B	B	B	H	B	B	B	B	B	B	H	B
chr1_7082544_A_G	1	7082544	-	T/C	H	B	B	B	B	B	B	B	B	B	B	B	B	B	B	B	U	B	B	B	B	B	B	B	B	B	H	B	B	B	B	B	B	B	B	B	B	B	B	H	B	B	B	H	B
chr1_7108686_A_C	1	7108686	+	A/C	A	A	A	A	A	A	A	A	A	A	A	A	A	A	A	A	A	A	A	A	A	A	A	H	A	A	A	A	H	A	A	A	A	A	A	A	H	A	A	A	A	A	A	H	A
chr1_7135890_A_G	1	7135890	+	A/G	A	A	A	A	A	A	A	A	A	A	A	A	A	A	A	A	A	A	A	A	A	A	A	H	A	A	A	A	H	A	A	A	A	A	A	A	H	A	A	A	A	A	A	H	A
chr1_7146078_C_T	1	7146078	+	A/G	B	B	B	B	B	B	B	B	B	B	B	B	B	B	B	B	B	B	B	B	B	B	B	H	B	B	B	B	H	B	B	B	B	B	B	B	H	B	B	B	B	B	B	H	B
chr1_7178328_C_T	1	7178328	-	T/C	H	H	H	A	A	A	A	H	A	A	A	H	A	A	A	H	A	H	A	A	A	A	H	H	H	H	H	H	H	H	A	H	A	A	H	A	H	A	H	H	H	A	A	H	A
chr1_7251013_C_T	1	7251013	-	T/C	A	A	H	A	A	U	H	A	A	A	A	A	A	A	H	A	A	A	A	A	A	A	A	A	A	A	A	A	A	A	A	H	A	A	A	A	H	A	A	A	A	A	A	A	A
chr1_728704_A_G	1	728704	+	A/G	B	B	H	B	B	B	H	H	B	B	B	B	B	B	B	B	B	B	B	B	B	B	B	H	B	B	B	B	B	B	B	H	B	B	B	B	B	B	B	B	B	B	B	B	B
chr1_7288880_C_T	1	7288880	+	A/G	A	A	A	A	A	A	A	A	A	A	A	A	A	A	A	A	A	A	A	A	A	A	A	H	A	A	A	A	H	A	A	H	A	A	A	A	A	A	A	A	A	A	A	H	A
chr1_7290040_A_G	1	7290040	+	A/G	B	B	H	B	H	U	A	B	B	H	B	H	B	B	A	B	B	A	B	B	B	B	H	H	H	B	B	H	H	B	B	H	B	B	H	B	A	H	B	B	B	H	B	H	B
chr1_7323014_C_T	1	7323014	-	T/C	B	B	B	B	B	B	B	H	B	B	B	B	B	B	H	B	B	B	B	B	B	B	B	H	B	B	B	B	H	B	B	H	B	B	B	B	B	B	H	B	B	B	B	H	B
chr1_7349729_C_T	1	7349729	+	A/G	B	B	B	B	B	U	H	H	B	B	B	B	B	B	B	U	B	B	B	B	B	B	B	H	B	B	U	B	H	B	B	B	B	B	B	U	B	B	B	U	B	H	B	A	B
chr1_7394780_C_T	1	7394780	+	A/G	A	A	A	A	A	A	A	A	A	A	A	A	A	A	A	A	A	A	A	A	A	A	A	A	A	A	A	A	A	A	A	A	A	A	A	A	A	A	A	A	A	A	A	A	A
chr1_7395213_C_T	1	7395213	+	A/G	A	A	A	A	A	A	A	A	A	A	A	A	A	A	H	A	A	A	A	A	A	A	A	A	A	A	A	A	A	A	A	A	A	A	A	A	A	A	A	A	A	A	A	A	A
chr1_7422730_C_T	1	7422730	+	A/G	A	A	A	A	A	A	A	A	A	A	A	A	A	A	H	A	A	A	A	A	A	A	A	A	A	A	A	A	A	A	A	A	A	A	A	A	A	A	A	A	A	A	A	A	A
chr1_7440546_A_G	1	7440546	+	A/G	A	A	H	A	A	A	H	H	A	A	A	A	H	A	H	A	A	H	A	A	A	H	A	H	A	A	A	H	H	A	A	H	A	A	A	A	H	A	A	A	A	A	A	H	A
chr1_7498727_C_T	1	7498727	-	T/C	B	B	B	B	B	B	H	B	B	B	B	B	H	B	H	B	B	B	B	B	B	B	B	B	B	B	B	B	B	B	B	H	B	B	B	B	H	B	H	B	B	B	B	B	B
chr1_7536794_G_T	1	7536794	-	T/G	B	B	H	B	B	B	B	B	B	B	B	B	B	B	U	B	B	B	B	B	B	B	B	B	B	B	B	B	B	B	B	H	B	B	B	B	B	B	B	B	B	B	B	B	B
chr1_7571627_C_T	1	7571627	-	T/C	A	A	H	A	A	A	A	H	A	A	A	A	A	A	H	A	A	A	A	A	A	A	A	H	A	A	A	A	H	A	A	H	A	A	A	A	A	A	A	A	A	A	A	H	A
chr1_7593079_A_G	1	7593079	-	T/C	A	A	A	A	A	A	H	A	A	A	A	A	H	A	A	A	A	A	A	A	A	A	A	A	A	A	A	A	A	A	A	H	A	A	A	A	H	A	B	A	A	A	A	A	A
chr1_7621682_C_T	1	7621682	-	T/C	A	A	A	A	A	U	B	A	A	A	A	A	A	A	A	A	A	A	A	A	A	A	A	A	A	A	A	A	A	A	A	A	A	A	A	A	B	A	A	A	A	A	A	A	A
chr1_7637892_C_T	1	7637892	-	T/C	H	A	H	B	A	B	B	B	H	B	U	A	B	A	H	B	U	B	B	B	H	B	B	B	B	B	B	B	B	B	H	H	B	B	B	B	B	B	H	B	B	B	H	B	H
chr1_765680_C_T	1	765680	-	T/C	B	B	B	B	B	B	B	B	B	B	B	B	B	B	H	B	B	B	B	B	B	B	B	B	B	B	B	B	H	B	B	B	B	B	B	B	B	B	B	B	B	B	B	H	B
chr1_7691369_A_G	1	7691369	-	T/C	B	B	H	B	B	B	H	H	B	B	B	B	H	B	H	B	B	B	B	B	B	B	B	H	B	B	B	B	H	B	B	B	B	B	B	B	H	B	B	B	B	B	B	H	B
chr1_7712244_A_G	1	7712244	+	A/G	B	B	B	B	B	B	B	B	B	B	B	B	B	B	B	B	B	B	B	B	B	B	B	B	B	B	B	B	B	B	B	B	B	B	B	B	B	B	B	B	B	B	B	B	B
chr1_7741364_C_T	1	7741364	-	T/C	B	B	H	B	B	U	H	B	B	B	B	B	B	B	H	B	B	B	B	B	B	B	B	B	B	B	B	B	B	B	B	H	B	B	B	B	H	B	H	B	B	B	B	B	B
chr1_7757014_C_T	1	7757014	+	A/G	B	B	H	B	B	U	H	B	B	B	B	B	B	B	H	B	B	B	B	B	B	B	B	B	B	B	B	B	B	B	B	B	B	B	B	B	H	B	B	B	B	B	B	B	B
chr1_7785005_C_T	1	7785005	-	T/C	B	B	H	B	B	B	B	B	B	B	B	B	B	B	B	B	B	B	B	B	B	B	B	B	B	B	B	B	B	B	B	B	B	B	B	B	B	B	B	B	B	B	B	B	B
chr1_7822798_A_G	1	7822798	+	A/G	A	A	A	A	A	A	A	A	A	A	A	A	A	A	H	A	A	A	A	A	A	A	A	A	A	A	A	A	A	A	A	H	A	A	A	A	A	A	H	A	A	A	A	A	A
chr1_7852689_C_T	1	7852689	-	T/C	A	A	A	A	A	A	H	A	A	B	A	A	A	A	A	A	A	A	A	A	A	A	A	A	A	A	A	A	A	A	A	A	A	A	A	A	H	A	A	A	A	A	A	A	A
chr1_7870690_A_G	1	7870690	+	A/G	B	B	B	B	B	B	H	B	B	B	B	B	B	B	B	B	B	B	B	B	B	B	B	B	B	B	B	B	B	B	B	B	B	B	B	B	H	B	B	B	B	B	B	B	B
chr1_792517_A_C	1	792517	+	A/C	A	A	H	A	A	A	A	H	A	A	H	A	B	A	B	A	A	A	H	A	A	A	A	H	A	A	A	A	B	A	A	B	A	H	H	A	B	A	H	U	A	H	A	H	A
chr1_7933647_C_T	1	7933647	+	A/G	H	H	H	H	B	H	H	H	B	H	B	B	H	B	B	H	B	B	B	B	B	H	B	H	B	H	H	H	H	H	B	H	H	B	B	H	H	B	H	H	H	B	B	H	B
chr1_7963986_A_G	1	7963986	+	A/G	A	A	H	A	A	U	H	A	A	A	A	A	A	A	B	A	A	A	A	A	A	A	A	A	A	A	A	A	A	A	A	A	A	A	A	A	H	A	A	A	A	A	A	A	A
chr1_799033_A_C	1	799033	+	A/C	B	B	H	B	B	B	H	H	B	B	B	B	B	B	B	B	B	B	B	B	B	B	B	H	B	B	B	B	H	B	B	B	B	B	B	B	B	B	B	B	B	B	B	H	B
chr1_799751_C_T	1	799751	-	T/C	B	B	B	B	B	B	B	B	B	B	B	B	B	B	A	B	B	B	B	B	B	B	B	B	B	B	B	B	H	B	B	B	B	B	B	B	H	B	B	B	B	B	B	H	B
chr1_8000724_A_C	1	8000724	+	A/C	A	A	A	A	A	A	H	A	A	A	A	A	A	A	H	A	A	A	A	A	A	A	A	A	A	A	A	A	A	A	A	A	A	A	A	A	H	A	A	A	A	A	A	A	A
chr1_8037779_C_T	1	8037779	-	T/C	B	B	B	B	B	B	H	H	B	B	B	B	B	B	B	B	B	B	B	B	B	B	B	H	B	B	B	B	H	B	B	H	B	B	B	B	H	B	H	B	B	B	B	H	B
chr1_8062657_C_T	1	8062657	-	T/C	A	A	A	A	A	A	A	A	A	A	A	A	A	A	H	A	A	A	A	A	A	A	A	A	A	A	A	A	A	A	A	A	A	A	A	A	A	A	A	A	A	A	A	A	A
chr1_8071772_G_T	1	8071772	-	T/G	A	A	A	A	A	A	A	A	A	A	A	A	A	A	A	A	A	A	A	A	A	A	A	A	A	A	A	A	A	A	A	H	A	A	A	A	A	A	U	A	A	A	A	A	A
chr1_8176660_A_G	1	8176660	-	T/C	B	B	B	B	B	B	H	B	B	B	B	B	B	B	B	B	B	B	B	B	B	B	B	B	B	B	B	B	B	B	B	B	B	B	B	B	H	B	B	B	B	H	B	B	B
chr1_8202506_A_G	1	8202506	+	A/G	B	B	B	B	B	H	A	B	B	B	B	B	B	B	B	B	B	B	B	B	B	B	B	B	B	B	B	B	B	B	B	B	B	B	B	B	H	B	B	B	B	B	B	B	B
chr1_8210025_A_G	1	8210025	-	T/C	A	A	A	A	A	A	A	A	A	A	A	A	A	A	H	A	A	A	A	A	A	A	A	A	A	A	A	A	A	A	A	B	A	A	A	A	A	A	H	A	A	A	A	A	A
chr1_8249755_A_G	1	8249755	+	A/G	H	B	H	H	B	A	H	B	B	B	B	B	H	B	B	A	B	U	B	B	B	H	B	U	B	H	A	B	B	B	B	B	H	B	B	A	H	B	H	A	B	B	B	H	B
chr1_8429331_A_C	1	8429331	+	A/C	B	B	H	H	H	B	H	H	H	H	A	H	H	A	A	B	A	B	H	A	H	B	H	H	H	H	B	B	H	H	H	A	H	B	H	B	H	B	H	B	H	B	H	H	H
chr1_8429533_A_G	1	8429533	-	T/C	A	A	A	A	A	U	H	H	A	A	A	A	A	A	A	A	A	A	A	A	A	A	A	H	A	A	A	A	H	A	A	H	A	A	A	A	H	A	A	A	A	A	A	H	A
chr1_8467057_G_T	1	8467057	-	T/G	B	B	B	B	B	B	B	B	B	B	B	B	B	B	B	B	B	B	B	B	B	B	B	B	B	B	B	B	B	B	B	A	B	B	B	B	B	B	H	B	B	B	B	B	B
chr1_8492715_C_T	1	8492715	-	T/C	A	A	A	A	A	U	H	A	A	A	A	A	A	A	A	A	A	A	A	A	A	A	A	A	A	A	A	A	A	A	A	A	A	A	A	A	H	A	A	A	A	A	A	A	A
chr1_8649084_C_T	1	8649084	+	A/G	B	B	B	B	B	B	B	B	B	B	B	B	B	B	B	B	B	B	B	B	B	B	B	B	U	B	B	B	B	B	B	U	B	B	B	B	B	B	B	B	B	B	B	B	B
chr1_8671481_C_T	1	8671481	-	T/C	A	A	H	A	A	A	A	A	A	A	A	A	A	A	H	A	A	A	A	A	A	A	A	A	A	A	A	A	A	A	A	B	A	A	A	A	A	A	H	A	A	A	A	A	A
chr1_8676663_C_T	1	8676663	+	A/G	B	A	U	A	A	A	A	B	A	A	A	A	A	B	B	U	A	B	B	B	B	A	A	U	U	A	U	B	H	A	B	B	A	A	B	U	A	A	B	U	A	A	A	B	A
chr1_8705451_G_T	1	8705451	-	T/G	A	A	A	A	A	A	A	A	A	A	A	A	A	A	B	A	A	A	A	A	A	A	A	A	A	A	A	A	A	A	A	H	A	A	A	A	A	A	A	A	A	A	A	A	A
chr1_8710909_A_G	1	8710909	-	T/C	A	A	H	A	A	A	H	A	A	A	A	A	A	A	A	A	A	A	A	A	A	A	A	A	A	A	A	A	A	A	A	A	A	A	A	A	H	A	A	A	A	A	A	A	A
chr1_8744093_C_T	1	8744093	+	A/G	A	A	A	A	A	A	H	H	A	A	A	A	H	A	A	A	A	A	A	A	A	A	A	H	A	A	A	A	H	A	A	H	A	A	A	A	H	A	H	A	A	A	A	H	A
chr1_8780767_A_C	1	8780767	+	A/C	B	B	H	B	B	B	H	H	B	B	B	B	H	B	B	B	B	B	B	B	B	B	B	H	B	B	B	B	H	B	B	A	B	B	B	B	H	B	H	B	B	B	B	H	B
chr1_8821137_A_G	1	8821137	+	A/G	A	A	H	A	A	A	H	H	A	A	A	A	H	A	A	A	A	A	A	A	A	A	H	H	A	A	A	A	H	A	A	B	A	A	A	A	H	A	H	A	A	A	A	H	A
chr1_8850489_A_G	1	8850489	-	T/C	A	A	H	A	A	A	A	A	A	A	A	A	A	A	H	A	A	A	A	A	A	A	A	A	A	A	A	A	A	A	A	A	A	A	A	A	A	A	A	A	A	A	A	A	A
chr1_8890473_A_C	1	8890473	+	A/C	A	A	A	A	A	A	H	H	A	A	A	A	A	A	A	A	A	A	A	A	A	A	A	H	A	A	A	A	H	A	A	A	A	A	A	A	H	A	A	A	A	A	A	H	A
chr1_8924712_C_T	1	8924712	-	T/C	B	B	B	B	B	U	H	H	B	B	B	B	B	B	A	B	B	B	B	B	B	B	U	H	B	B	B	B	H	B	B	A	B	B	B	B	H	U	H	B	B	B	B	H	B
chr1_8958136_C_T	1	8958136	+	A/G	A	A	A	A	A	A	A	A	A	A	A	A	A	A	A	A	A	A	A	A	A	A	A	A	A	A	A	A	A	A	A	H	A	A	A	A	A	A	H	A	A	A	A	A	A
chr1_8975551_C_T	1	8975551	-	T/C	B	B	H	B	B	B	B	H	B	B	B	B	B	B	A	B	B	B	B	H	B	B	B	H	B	B	B	B	H	B	B	A	B	B	B	B	B	B	H	B	B	B	B	H	B
chr1_9000381_A_C	1	9000381	+	A/C	B	B	B	B	B	B	B	B	B	B	B	B	H	B	B	B	B	B	B	B	B	B	B	B	B	B	B	B	B	B	B	B	B	B	B	B	B	B	B	B	B	B	B	B	B
chr1_9015822_A_G	1	9015822	-	T/C	A	A	A	A	A	A	A	H	A	A	A	A	A	A	H	A	A	A	A	A	A	A	A	H	A	A	A	A	H	A	A	A	A	A	A	A	A	A	A	A	A	A	A	H	A
chr1_9069439_G_T	1	9069439	+	A/C	B	B	B	B	B	U	H	B	B	B	B	B	B	B	B	B	B	B	B	B	B	B	A	B	B	B	B	B	B	B	B	B	B	B	B	B	H	B	B	B	B	H	B	B	B
chr1_9096264_A_G	1	9096264	+	A/G	B	H	B	A	B	U	B	H	B	H	B	B	B	B	H	H	B	B	H	B	H	H	B	H	B	H	B	A	H	A	B	B	A	H	B	H	H	B	B	B	A	B	H	H	H
chr1_9242867_A_G	1	9242867	+	A/G	A	A	A	A	A	A	A	A	A	A	A	A	A	A	A	A	A	A	A	A	A	A	A	A	A	A	A	A	A	A	A	H	A	A	A	A	A	A	H	A	A	A	A	A	A
chr1_9305946_A_G	1	9305946	+	A/G	B	B	B	B	B	B	H	B	B	B	B	B	B	B	B	B	B	B	B	B	B	B	B	B	B	B	B	B	B	B	B	B	B	B	B	B	H	B	B	B	B	B	B	B	B
chr1_9321654_A_C	1	9321654	-	T/G	A	A	A	A	A	U	H	A	A	A	A	A	A	A	A	A	A	A	A	A	A	A	A	A	A	A	A	A	A	A	A	A	A	A	A	A	H	A	A	A	A	A	A	A	A
chr1_9353859_A_G	1	9353859	+	A/G	B	B	H	B	B	B	B	H	B	B	B	B	B	B	A	B	B	B	B	B	B	B	B	B	B	B	B	B	B	B	B	H	B	B	B	B	B	B	B	B	B	B	B	B	B
chr1_9436830_G_T	1	9436830	+	A/C	B	B	H	B	B	B	B	H	B	B	B	B	H	B	H	B	B	B	B	B	B	B	B	B	B	B	B	B	B	B	B	H	B	B	B	B	B	B	B	B	B	B	B	B	B
chr1_946801_C_T	1	946801	-	T/C	B	B	B	B	B	B	B	H	B	B	B	B	B	B	B	B	B	B	B	B	B	B	B	B	B	B	B	B	B	B	B	B	B	B	B	B	B	B	B	B	B	B	B	B	B
chr1_9496251_A_C	1	9496251	+	A/C	A	A	A	A	A	A	A	A	A	A	A	A	A	A	A	A	A	A	A	A	A	A	A	A	A	A	A	A	A	A	A	H	A	A	A	A	A	A	H	A	A	A	A	A	A
chr1_9532553_A_G	1	9532553	+	A/G	A	A	H	A	A	A	A	A	A	A	A	A	A	U	H	A	U	A	A	A	A	A	A	A	A	A	A	A	A	A	U	H	A	U	A	A	A	A	A	A	A	A	A	A	A
chr1_9567236_G_T	1	9567236	-	T/G	A	A	A	A	A	A	H	A	A	A	A	A	H	A	A	A	A	A	A	A	A	A	A	H	A	A	A	A	H	A	A	H	A	A	A	A	H	A	H	A	A	A	A	H	A
chr1_9603446_A_G	1	9603446	+	A/G	B	B	B	B	B	B	B	B	B	B	B	B	B	B	B	B	B	B	B	B	B	B	B	B	B	B	B	B	B	B	B	B	B	B	B	B	B	B	B	B	B	B	B	B	B
chr1_9697433_C_T	1	9697433	-	T/C	A	A	A	A	A	A	A	A	A	A	A	A	A	A	A	A	A	A	A	A	A	A	A	A	A	A	A	A	A	A	A	A	A	A	A	A	A	A	A	A	A	A	A	A	A
chr1_9713401_A_G	1	9713401	-	T/C	B	B	U	B	B	U	A	B	B	B	B	B	U	B	B	U	B	U	B	B	B	B	B	A	B	B	U	B	A	B	B	B	B	B	B	U	A	B	B	U	B	B	B	A	B
chr1_9743721_C_T	1	9743721	+	A/G	B	B	B	B	B	B	B	B	B	B	B	B	H	B	B	B	B	B	B	B	B	B	B	B	B	B	B	B	B	B	B	B	B	B	B	B	B	B	B	B	B	B	B	B	B
chr1_9750032_A_C	1	9750032	+	A/C	B	B	H	B	B	B	B	B	B	B	B	B	B	B	H	B	B	B	B	B	B	B	B	B	B	B	B	B	B	B	B	H	B	B	B	B	B	B	B	B	B	B	B	B	B
chr1_9779606_A_G	1	9779606	+	A/G	H	H	A	H	B	A	A	H	B	H	B	H	A	B	A	A	B	A	B	B	B	H	B	H	B	H	A	H	A	H	B	H	H	B	H	A	H	H	U	A	H	H	B	A	H
chr1_980292_C_T	1	980292	-	T/C	B	B	H	B	B	B	H	H	B	B	B	B	H	B	A	B	B	B	B	B	B	B	B	H	B	B	B	B	H	B	B	A	B	B	B	B	A	B	H	B	B	B	B	H	B
chr1_9816361_A_G	1	9816361	+	A/G	B	B	H	B	B	B	B	H	B	B	B	H	H	B	H	H	B	B	B	B	B	B	B	B	B	B	B	B	B	B	B	B	B	B	B	B	B	B	B	B	B	H	B	B	B
chr1_9849128_A_G	1	9849128	+	A/G	B	B	H	H	B	H	A	H	H	H	B	B	H	B	H	B	B	H	B	B	B	B	B	H	B	B	B	B	A	B	B	A	H	B	H	B	H	B	A	B	B	H	B	H	B
chr1_9887731_A_G	1	9887731	-	T/C	A	A	H	A	A	A	A	A	A	A	A	A	A	A	H	A	A	A	A	A	A	A	A	A	A	A	A	A	A	A	A	A	A	A	A	A	A	A	A	A	A	A	A	A	A
chr1_9900799_C_T	1	9900799	-	T/C	B	B	B	B	B	B	H	B	B	B	B	B	B	B	B	B	B	B	B	B	B	B	B	B	B	B	B	B	H	B	B	B	B	B	B	B	H	B	B	B	B	B	B	A	B
chr1_9923278_C_T	1	9923278	-	T/C	A	A	A	A	A	U	H	A	A	A	A	A	A	A	A	A	A	A	A	A	A	A	A	A	A	A	A	A	H	A	A	H	A	A	A	A	H	A	A	A	A	A	A	H	A
chr1_996477_A_G	1	996477	+	A/G	H	H	H	B	A	U	A	A	A	H	H	H	A	A	H	B	A	A	H	A	A	H	A	U	A	H	H	H	H	A	A	H	H	A	A	H	B	A	H	H	H	A	A	H	A
chr1_9996086_C_T	1	9996086	-	T/C	A	A	H	A	A	A	A	A	A	A	A	A	A	A	A	A	A	A	A	A	A	A	A	H	A	A	A	A	A	A	A	H	A	A	A	A	A	A	H	A	A	A	A	A	A
chr1_random_299123_A_G	1	299123	+	A/G	A	A	H	A	A	A	A	A	A	A	A	A	A	A	H	A	A	A	A	A	A	A	A	A	A	A	A	A	A	A	A	A	A	A	A	A	A	A	A	A	A	A	A	A	A
chr1_random_299660_A_G	1	299660	+	A/G	B	B	B	B	B	B	B	B	B	B	B	B	H	B	H	B	B	H	B	B	B	B	B	B	B	B	H	B	H	B	B	B	B	B	H	B	B	B	B	H	B	B	B	B	B
chr1_random_310365_A_C	1	310365	+	A/C	A	A	A	A	A	A	H	H	A	A	A	A	H	A	H	A	A	A	A	A	A	A	A	H	A	A	A	A	H	A	A	B	A	A	A	A	H	A	H	A	A	A	A	H	A
chr1_random_312051_A_G	1	312051	+	A/G	A	A	A	A	A	A	A	A	U	A	A	A	A	A	H	A	A	A	A	A	A	A	A	A	A	A	A	A	A	A	A	A	A	A	A	A	A	A	A	A	A	A	A	A	A
chr1_random_320168_A_G	1	320168	+	A/G	B	B	B	B	B	B	H	H	B	B	B	B	H	B	H	B	B	B	B	B	B	B	B	B	B	B	B	B	H	B	B	H	B	B	B	B	H	B	H	B	B	B	B	H	B
chr1_random_468874_C_T	1	468874	+	A/G	A	A	A	A	A	A	H	H	A	A	A	A	H	A	H	A	A	A	A	A	A	A	A	A	A	A	A	A	H	A	A	H	A	A	A	A	H	A	H	A	A	A	A	H	A
chr1_random_487744_C_T	1	487744	-	T/C	A	A	H	A	A	A	A	A	A	A	A	A	A	A	A	A	A	A	A	A	A	A	A	A	A	A	A	A	A	A	A	A	A	A	A	A	A	A	A	A	A	A	A	A	A
chr1_random_490188_A_G	1	490188	+	A/G	B	B	B	B	B	B	B	B	B	B	B	B	B	B	B	B	B	B	B	B	B	B	B	H	B	B	B	B	B	B	B	H	B	B	B	B	B	B	B	B	B	B	B	B	B
chr1_random_506200_C_T	1	506200	-	T/C	H	H	B	H	H	U	H	H	H	H	H	H	H	H	H	B	H	H	H	H	H	H	H	H	H	H	U	H	H	H	H	H	H	H	H	U	H	H	H	H	H	H	H	H	H
chr1_random_518920_A_G	1	518920	-	T/C	B	B	B	B	B	B	B	B	B	B	B	B	B	B	H	U	B	B	B	B	B	B	B	B	B	B	B	B	B	B	B	B	B	B	B	B	B	B	B	B	B	B	B	B	B
chr1_random_522206_A_C	1	522206	-	T/G	A	A	A	A	A	A	A	H	A	A	A	A	H	A	A	A	A	A	A	A	A	A	A	H	A	A	A	A	H	A	A	B	A	A	A	A	H	A	A	A	A	A	A	H	A
chr1_random_522794_C_T	1	522794	-	T/C	A	A	A	A	A	A	A	H	A	A	A	A	A	A	A	A	A	A	A	A	A	A	A	A	A	A	A	A	A	A	A	A	A	A	A	A	A	A	A	A	A	A	A	A	A
chr1_random_545810_C_T	1	545810	+	A/G	B	B	U	B	B	B	B	B	B	B	B	B	B	B	B	B	B	B	B	B	B	B	B	B	B	B	B	B	B	B	B	B	B	B	B	B	B	B	B	B	B	B	B	B	B
chr1_random_546617_A_G	1	546617	+	A/G	A	A	A	A	A	U	H	U	A	A	A	A	H	A	B	A	A	A	A	A	A	A	A	H	A	A	A	A	H	A	A	B	A	A	A	A	U	A	H	A	A	A	A	H	A
chr10_10007512_A_G	10	10007512	+	A/G	A	A	H	A	A	U	H	H	A	A	A	A	H	A	B	A	A	A	A	A	A	A	A	A	A	A	A	A	A	A	A	A	A	A	A	A	H	A	A	A	A	A	A	A	A
chr10_1001102_G_T	10	1001102	+	A/C	H	B	B	U	B	B	B	H	B	U	B	B	A	B	A	U	B	U	B	B	B	B	B	B	B	B	U	B	H	B	B	H	B	B	B	U	H	B	B	U	B	B	B	A	B
chr10_10024283_A_G	10	10024283	+	A/G	H	A	A	A	A	A	A	A	A	A	A	A	A	H	A	A	A	A	A	H	A	A	B	A	A	A	A	A	A	A	A	A	A	H	A	A	A	H	A	A	A	A	A	A	A
chr10_10097565_C_T	10	10097565	-	T/C	H	A	H	A	A	A	H	U	A	A	A	A	U	A	H	A	A	A	A	A	A	A	A	A	A	A	A	A	H	A	A	H	A	A	A	A	U	A	U	A	A	A	A	H	A
chr10_10112396_C_T	10	10112396	-	T/C	H	B	B	B	B	B	B	B	B	B	B	B	B	B	B	B	B	B	B	H	B	B	H	B	B	B	B	B	H	B	B	A	B	B	B	B	H	B	H	B	B	B	B	H	B
chr10_10153909_A_C	10	10153909	+	A/C	A	A	A	A	A	A	A	A	A	A	A	A	H	A	A	A	A	A	A	A	A	A	A	A	A	A	A	A	A	A	A	A	A	A	A	A	A	A	A	A	A	A	A	A	A
chr10_10173531_A_G	10	10173531	-	T/C	A	A	H	A	A	A	H	H	A	A	A	A	A	A	A	A	A	A	A	A	A	A	A	A	A	A	A	A	A	A	A	A	A	A	A	A	A	A	A	A	A	A	A	A	A
chr10_10225999_A_G	10	10225999	+	A/G	H	B	B	B	B	B	B	H	B	B	B	B	H	B	H	B	B	B	B	B	B	B	B	B	B	B	B	B	H	B	B	H	B	B	B	B	H	B	H	B	B	B	B	H	B
chr10_1038557_A_G	10	1038557	-	T/C	A	A	A	A	A	A	H	A	A	A	A	A	A	A	A	A	A	A	A	A	A	A	A	A	A	A	A	A	A	A	A	H	A	A	A	A	H	A	B	A	A	A	A	A	A
chr10_1040043_G_T	10	1040043	+	A/C	B	B	B	B	B	U	H	B	B	B	B	B	B	B	B	U	B	U	B	H	B	H	H	B	H	B	B	B	B	H	B	H	B	B	B	B	H	B	A	A	B	B	B	B	B
chr10_10477108_C_T	10	10477108	+	A/G	H	A	A	A	A	A	A	H	A	A	A	A	A	A	A	A	A	A	A	A	A	A	A	A	A	A	A	A	H	A	A	B	A	A	A	A	A	A	H	A	A	A	A	H	A
chr10_10477837_A_G	10	10477837	-	T/C	H	H	B	H	B	A	B	H	B	H	B	B	H	B	B	A	B	H	B	B	B	H	B	U	B	H	H	B	H	H	B	A	H	B	H	H	B	B	A	A	H	B	B	H	B
chr10_10497318_C_T	10	10497318	+	A/G	H	A	H	A	A	A	H	H	A	A	A	H	H	A	H	A	A	A	A	H	A	A	H	A	A	A	A	A	B	A	A	B	A	A	A	A	B	A	H	A	A	A	A	H	A
chr10_10528389_A_G	10	10528389	+	A/G	H	A	A	A	A	A	A	H	A	A	A	A	H	A	H	A	A	A	A	A	H	A	A	A	A	A	A	A	H	A	A	B	A	A	A	A	H	A	H	A	A	A	A	H	A
chr10_10532746_C_T	10	10532746	-	T/C	A	A	B	A	A	A	H	A	A	A	A	A	A	A	H	A	A	H	A	A	A	A	A	H	A	H	A	H	A	H	A	A	A	A	H	A	A	A	A	A	A	A	H	A	B
chr10_10559171_A_C	10	10559171	+	A/C	B	B	A	B	B	B	A	B	H	B	B	B	B	B	B	B	B	B	B	B	B	B	B	B	B	U	B	B	B	U	B	B	B	B	A	B	H	B	H	B	B	B	B	U	U
chr10_10642694_A_G	10	10642694	-	T/C	B	B	B	B	B	B	B	H	B	B	B	B	H	B	A	B	B	B	B	B	B	B	B	B	B	B	B	B	B	B	B	B	B	B	B	H	H	B	B	H	B	B	B	B	B
chr10_10645433_A_G	10	10645433	-	T/C	B	B	B	B	B	B	B	H	B	B	B	B	H	B	A	B	B	B	B	B	B	B	B	B	B	B	B	B	B	B	B	B	B	B	B	B	H	B	B	B	B	B	B	B	B
chr10_10690498_A_G	10	10690498	+	A/G	B	B	B	B	B	B	B	B	B	B	B	B	B	B	H	B	B	B	B	B	B	B	B	B	B	B	B	B	B	B	B	B	B	B	B	B	B	B	B	B	B	B	B	B	B
chr10_10692062_A_C	10	10692062	-	T/G	A	A	A	A	A	A	A	A	A	A	A	A	A	A	A	A	A	A	A	A	A	A	A	A	A	A	A	A	A	A	A	A	A	A	A	A	A	A	A	A	A	A	A	A	A
chr10_1069442_C_T	10	1069442	+	A/G	B	B	B	B	B	B	H	B	B	B	B	B	B	B	B	B	B	B	B	B	B	B	B	B	B	B	B	B	B	B	B	B	B	B	B	B	H	B	B	B	B	B	B	B	B
chr10_10755483_C_T	10	10755483	+	A/G	A	A	A	A	A	A	A	H	A	A	A	A	B	A	A	A	A	A	A	A	A	A	A	A	A	A	A	A	A	A	A	A	A	A	A	A	A	A	A	A	A	A	A	A	A
chr10_10784022_A_C	10	10784022	-	T/G	A	A	A	A	A	A	A	A	A	A	A	A	A	A	A	A	A	A	A	A	A	A	A	A	A	A	A	A	A	A	A	A	A	A	A	A	A	A	A	A	A	A	A	A	A
chr10_10861392_A_C	10	10861392	+	A/C	B	B	B	B	B	B	B	H	B	B	B	B	A	B	H	B	B	B	B	B	B	B	B	B	B	B	B	B	B	B	B	B	B	B	B	B	B	B	B	B	B	B	B	B	B
chr10_10865611_A_G	10	10865611	+	A/G	A	A	A	A	A	A	A	A	A	A	A	A	A	A	A	A	A	A	A	A	A	A	A	A	A	A	A	A	A	A	A	A	A	A	A	A	A	A	A	A	A	A	A	A	A
chr10_10946300_G_T	10	10946300	+	A/C	A	H	B	H	B	A	H	A	A	H	A	B	A	B	H	A	B	A	B	A	H	A	A	U	B	H	A	H	A	H	B	A	H	H	A	A	H	H	A	A	H	H	B	A	B
chr10_10947246_C_T	10	10947246	-	T/C	B	B	B	B	B	B	B	B	B	B	B	B	B	B	U	B	B	B	B	B	B	B	B	B	B	B	B	H	A	B	B	U	B	B	H	B	B	B	B	B	B	B	B	B	B
chr10_10985237_G_T	10	10985237	+	A/C	B	B	H	B	B	B	H	B	B	B	B	B	B	B	B	B	B	B	B	B	B	B	B	B	B	B	B	B	B	B	B	B	B	B	B	B	B	B	B	B	B	B	B	B	B
chr10_1104305_A_C	10	1104305	+	A/C	H	A	H	A	A	A	A	A	A	A	A	A	U	A	H	A	A	A	A	A	A	A	A	U	A	A	A	A	H	A	A	H	A	A	A	A	A	A	H	A	A	A	A	H	A
chr10_11051450_A_C	10	11051450	+	A/C	B	B	B	B	B	B	B	B	B	B	B	B	B	B	H	B	B	B	B	B	B	B	B	B	B	B	B	B	B	B	B	B	B	B	B	B	B	B	B	B	B	B	B	B	B
chr10_11052478_A_G	10	11052478	+	A/G	B	B	B	B	B	B	B	B	B	B	B	B	B	B	H	B	B	B	B	B	B	B	B	B	B	B	B	B	B	B	B	B	B	B	B	B	B	B	B	B	B	B	B	B	B
chr10_11068435_G_T	10	11068435	-	T/G	B	B	B	B	B	B	B	H	B	B	B	B	H	B	B	B	B	B	B	B	B	B	B	B	B	B	B	B	B	B	B	B	B	B	B	B	B	B	B	B	B	B	B	B	B
chr10_11097827_A_G	10	11097827	-	T/C	A	A	H	A	A	A	H	A	A	A	A	A	A	A	A	A	A	A	A	A	A	A	A	A	A	A	A	A	A	A	A	A	A	A	A	A	A	A	A	A	A	A	A	A	A
chr10_11139239_A_G	10	11139239	-	T/C	B	B	H	B	B	U	H	H	B	B	B	B	H	B	H	B	B	B	B	B	B	B	B	B	B	B	B	B	B	B	B	B	B	B	B	B	B	B	B	B	B	B	B	B	B
chr10_1120155_C_T	10	1120155	-	T/C	H	B	B	B	B	B	B	B	B	B	B	B	B	B	B	B	B	B	B	B	B	B	B	B	B	B	B	B	H	B	B	H	B	B	B	B	B	B	H	B	B	B	B	H	B
chr10_11208019_C_T	10	11208019	-	T/C	B	B	H	B	B	B	A	B	B	B	B	B	B	B	B	B	B	B	B	B	B	B	B	B	B	B	B	B	B	B	B	B	B	B	B	B	B	B	B	B	B	B	B	B	B
chr10_11244140_A_G	10	11244140	+	A/G	H	A	A	U	A	A	A	A	A	A	U	U	A	A	H	A	U	A	A	A	A	A	A	A	A	A	A	A	B	A	A	B	A	A	A	A	A	A	H	A	A	A	A	H	A
chr10_11249272_C_T	10	11249272	-	T/C	B	B	B	B	B	B	B	H	B	B	B	B	H	B	H	B	B	B	B	B	B	B	B	B	B	B	B	B	B	B	B	B	B	B	B	B	B	B	B	B	B	B	B	B	B
chr10_11297269_A_G	10	11297269	-	T/C	A	B	H	B	U	B	H	H	B	B	U	B	B	B	H	B	B	B	B	B	B	U	B	B	B	B	B	B	H	B	B	A	B	B	U	B	H	B	H	B	B	B	B	H	B
chr10_11297671_C_T	10	11297671	+	A/G	B	H	H	H	B	U	B	H	H	H	B	H	A	A	H	B	B	H	H	A	H	H	A	H	B	A	A	H	H	A	B	B	H	H	H	A	H	A	H	A	H	H	H	H	A
chr10_1135127_G_T	10	1135127	-	T/G	H	B	B	B	B	B	B	B	B	B	B	B	B	B	H	B	B	B	B	B	B	B	B	B	B	B	B	B	H	B	B	H	B	B	B	B	H	B	H	B	B	B	B	H	B
chr10_1136207_C_T	10	1136207	-	T/C	A	H	H	B	A	B	H	H	A	B	A	A	H	A	H	B	A	A	A	A	A	H	A	H	A	H	B	H	A	H	A	H	H	A	A	B	A	A	H	B	H	A	A	H	A
chr10_11410756_A_G	10	11410756	-	T/C	A	H	A	H	A	U	H	A	A	H	B	H	H	A	A	B	A	B	H	A	A	H	A	H	H	H	B	H	H	H	A	A	H	A	H	B	H	A	H	B	H	H	A	H	A
chr10_11412145_G_T	10	11412145	+	A/C	H	B	H	B	B	B	H	B	B	B	B	B	B	B	B	B	B	B	B	B	B	B	B	B	B	B	B	B	H	B	B	A	B	B	B	B	B	B	H	B	B	B	B	H	B
chr10_11424048_C_T	10	11424048	-	T/C	A	A	A	A	A	A	A	H	A	A	A	A	H	A	A	A	A	A	A	A	A	A	A	A	A	A	A	A	A	A	A	A	A	A	A	A	A	A	A	A	A	A	A	A	A
chr10_11533079_C_T	10	11533079	+	A/G	H	A	A	A	A	A	A	H	A	A	A	A	H	A	B	A	A	A	A	H	A	A	H	A	A	A	A	A	H	A	A	B	A	A	A	A	A	B	H	A	A	A	A	H	A
chr10_11554816_A_G	10	11554816	+	A/G	B	A	A	H	H	H	H	B	A	A	B	B	B	H	B	B	H	B	A	B	H	A	B	H	H	A	B	B	B	A	H	B	H	H	B	B	B	H	B	B	A	B	A	B	A
chr10_11559458_C_T	10	11559458	+	A/G	H	B	B	B	B	B	B	H	B	B	B	B	H	B	H	B	B	B	B	B	B	B	B	B	B	B	B	B	H	B	B	A	B	B	B	B	H	B	H	B	B	B	B	H	B
chr10_11571086_A_G	10	11571086	-	T/C	A	A	A	A	A	A	A	H	A	A	A	A	H	A	A	A	A	A	A	A	A	A	A	A	A	A	A	A	A	A	A	A	A	A	A	A	A	A	A	A	A	A	A	A	A
chr10_11742614_A_G	10	11742614	+	A/G	B	B	H	B	B	B	H	H	B	B	B	B	B	B	H	B	B	B	B	B	B	B	B	B	B	B	B	B	B	B	B	B	B	B	B	B	H	B	B	B	B	B	B	B	B
chr10_11744734_C_T	10	11744734	+	A/G	A	H	A	H	H	B	A	A	H	H	A	H	H	B	A	B	A	B	A	H	H	H	A	A	H	A	H	H	H	H	B	A	B	H	H	H	B	A	H	B	H	A	H	A	A
chr10_11765242_C_T	10	11765242	+	A/G	H	B	U	B	B	B	U	H	B	B	B	B	U	B	H	B	B	B	B	B	B	B	B	B	B	B	B	B	H	B	B	A	B	B	B	B	U	B	U	B	B	B	B	H	B
chr10_11784085_C_T	10	11784085	+	A/G	H	A	A	A	A	A	A	H	A	A	A	A	A	A	A	A	A	A	A	A	A	A	A	A	A	A	A	A	H	A	A	B	A	A	A	A	A	A	H	A	A	A	A	H	A
chr10_11791113_C_T	10	11791113	+	A/G	A	A	A	A	A	A	A	A	A	A	A	A	A	A	A	A	A	A	A	A	A	A	A	A	A	A	A	A	A	A	A	A	A	A	A	A	A	A	A	A	A	A	A	A	A
chr10_11814307_A_G	10	11814307	-	T/C	U	B	B	B	B	B	B	B	B	B	B	B	B	B	B	B	B	B	B	B	B	B	B	B	B	B	B	B	U	B	B	A	B	B	B	B	B	B	U	B	B	B	B	H	B
chr10_11843831_C_T	10	11843831	-	T/C	B	B	H	B	B	U	H	B	B	B	B	B	B	B	B	B	B	B	B	B	B	B	B	B	B	B	B	B	B	B	B	B	B	B	B	B	H	B	B	B	B	B	B	B	B
chr10_11859519_A_G	10	11859519	+	A/G	A	A	A	A	A	A	A	A	A	A	A	A	A	A	A	A	A	A	A	A	A	A	A	A	A	A	A	A	A	A	A	A	A	A	A	A	A	A	A	A	A	A	A	A	A
chr10_11876886_A_G	10	11876886	+	A/G	H	A	A	A	A	A	A	A	A	A	A	A	A	A	A	A	A	A	A	A	A	A	A	A	A	A	A	A	H	A	A	B	A	A	A	A	A	A	H	A	A	A	A	H	A
chr10_11908465_A_G	10	11908465	-	T/C	H	B	B	B	B	B	B	B	B	B	U	B	B	B	B	B	B	B	B	B	B	B	B	B	B	B	B	B	H	B	B	A	B	B	B	B	B	B	H	B	B	B	B	H	B
chr10_11970608_C_T	10	11970608	+	A/G	B	B	H	B	B	U	U	B	B	B	B	B	B	B	B	B	B	B	B	B	B	B	B	B	B	B	B	B	B	B	B	B	B	B	B	B	A	B	B	B	B	B	B	B	B
chr10_1197253_C_T	10	1197253	+	A/G	B	B	H	H	B	A	H	B	B	H	B	B	H	B	H	H	B	B	B	B	B	H	B	B	B	H	B	H	B	B	B	B	B	H	B	B	B	B	B	B	H	H	B	B	B
chr10_1197827_A_G	10	1197827	-	T/C	H	A	A	A	A	A	A	A	A	A	A	A	A	A	A	A	A	A	A	A	A	A	A	A	A	A	A	A	H	A	A	B	A	A	A	A	H	A	H	A	A	A	A	H	A
chr10_12022076_A_G	10	12022076	+	A/G	A	A	B	A	A	A	U	A	A	A	A	A	A	A	A	A	A	A	A	A	A	A	A	A	A	A	A	A	A	A	A	A	A	A	A	A	A	A	A	A	A	A	A	A	A
chr10_12045132_A_G	10	12045132	+	A/G	A	A	H	A	A	A	H	A	A	A	A	A	A	A	A	A	A	A	A	A	A	A	A	A	A	A	A	A	A	A	A	A	A	A	A	A	A	A	A	A	A	A	A	A	A
chr10_12144397_A_G	10	12144397	-	T/C	B	B	B	B	B	B	B	H	B	B	B	B	H	B	B	B	B	B	B	B	B	B	B	B	B	B	B	B	B	B	B	B	B	B	B	B	H	B	B	B	B	B	B	B	B
chr10_12175802_C_T	10	12175802	-	T/C	A	H	A	H	A	A	A	A	A	A	A	A	A	A	A	A	A	A	A	A	A	A	A	A	A	A	A	A	A	A	A	A	H	A	A	A	A	A	A	A	H	A	H	A	A
chr10_12195539_A_G	10	12195539	-	T/C	B	B	H	B	B	B	H	B	B	B	B	B	B	B	B	B	B	B	B	B	B	B	B	B	B	B	B	B	B	B	B	B	B	B	B	B	B	B	B	B	B	B	B	B	B
chr10_12271590_C_T	10	12271590	-	T/C	H	A	A	A	A	A	A	H	A	A	U	A	H	A	B	A	A	A	U	A	A	A	U	A	A	A	A	A	H	U	A	B	U	A	A	A	H	A	H	A	A	U	U	B	U
chr10_12291877_A_G	10	12291877	-	T/C	B	B	H	B	B	B	H	B	B	B	B	B	B	B	H	B	B	U	B	B	B	U	B	B	B	B	B	U	B	H	B	B	B	B	B	B	B	B	B	B	B	B	B	B	H
chr10_1231367_C_T	10	1231367	+	A/G	B	B	B	B	B	B	B	B	B	H	B	B	B	B	B	B	B	B	B	B	B	B	B	B	B	B	B	B	B	B	B	B	B	B	B	B	B	B	B	B	B	B	B	B	B
chr10_125104_A_G	10	125104	-	T/C	H	A	A	A	A	A	A	A	A	A	A	A	H	A	H	A	A	A	A	A	A	A	A	A	A	A	A	A	H	A	A	A	A	A	A	A	A	A	H	A	A	A	A	H	A
chr10_1262661_A_C	10	1262661	+	A/C	B	B	H	B	B	U	H	B	B	B	B	B	B	B	B	B	B	B	B	B	B	B	B	H	B	B	B	B	B	B	B	B	B	B	B	B	H	B	B	B	B	B	B	B	B
chr10_12726100_G_T	10	12726100	-	T/G	B	B	B	B	B	B	B	B	B	B	B	B	B	B	B	B	B	B	B	B	B	B	B	B	B	B	B	B	B	B	B	B	B	B	B	B	B	B	B	B	B	B	B	B	B
chr10_12746780_A_G	10	12746780	+	A/G	B	B	B	B	B	B	B	B	B	B	B	B	H	B	H	B	B	B	B	B	B	B	B	B	B	B	B	B	B	B	B	B	B	B	B	B	B	B	B	B	B	B	B	B	B
chr10_12763293_C_T	10	12763293	-	T/C	H	B	B	B	B	B	B	H	A	A	B	B	B	B	B	B	B	B	B	B	B	B	B	H	H	B	B	H	H	B	B	H	B	B	H	B	B	B	H	B	B	B	B	H	B
chr10_1277204_C_T	10	1277204	-	T/C	H	B	H	B	B	B	H	B	B	B	B	B	H	B	H	B	B	B	B	B	B	B	B	B	B	B	B	B	H	B	B	H	B	B	B	B	H	B	B	B	B	B	B	H	B
chr10_12837062_C_T	10	12837062	-	T/C	B	A	A	A	A	A	A	A	A	A	A	A	A	A	A	U	A	A	A	A	A	A	A	A	A	A	A	A	H	A	A	A	A	A	A	A	A	A	A	A	A	A	A	H	A
chr10_12870632_A_G	10	12870632	+	A/G	B	B	B	B	B	B	B	B	H	B	B	A	B	B	H	B	H	B	B	B	B	B	B	B	B	B	U	B	B	B	B	B	B	B	B	B	A	B	B	H	B	B	B	B	B
chr10_12881039_A_C	10	12881039	-	T/G	H	B	B	B	B	H	B	B	B	B	B	B	B	B	B	B	B	B	B	A	B	B	B	B	B	B	B	B	A	B	H	B	B	B	B	B	B	B	B	B	B	B	B	H	B
chr10_12929074_A_G	10	12929074	-	T/C	H	B	B	B	B	B	B	B	B	B	B	B	B	B	B	B	B	B	B	B	B	B	B	B	B	B	B	B	H	B	B	B	B	B	B	B	H	B	B	B	B	B	B	A	B
chr10_12936197_A_C	10	12936197	-	T/G	H	U	H	H	U	B	H	H	H	U	H	B	B	U	B	H	H	H	H	B	H	H	B	H	H	U	H	H	H	H	B	H	H	B	H	H	H	H	U	H	H	U	H	H	H
chr10_1294443_C_T	10	1294443	-	T/C	H	B	H	B	B	B	H	H	B	B	B	B	H	B	A	B	B	B	B	B	B	B	B	H	B	B	B	B	H	B	B	A	B	B	B	B	H	B	H	B	B	B	B	H	B
chr10_12967436_A_C	10	12967436	+	A/C	B	A	H	A	U	U	H	A	A	A	A	A	H	A	B	A	A	A	A	A	A	A	A	A	A	A	U	U	B	A	A	H	A	A	A	A	H	A	A	A	A	A	A	H	A
chr10_1327527_C_T	10	1327527	+	A/G	A	A	H	A	A	U	H	A	A	A	A	A	A	A	H	A	A	A	A	A	A	A	A	A	A	A	A	A	A	A	A	A	A	A	A	A	A	A	A	A	A	A	A	A	A
chr10_13475760_A_G	10	13475760	+	A/G	A	A	A	A	A	A	A	H	A	A	A	A	A	A	A	A	A	A	A	A	A	A	A	A	A	A	A	A	A	A	A	H	A	A	A	A	A	A	H	A	A	A	A	A	A
chr10_13534172_G_T	10	13534172	+	A/C	B	B	B	B	B	B	B	B	B	B	B	B	B	B	H	B	B	B	B	B	B	B	B	B	B	B	B	B	B	B	B	B	B	B	B	B	B	B	B	B	B	B	B	B	B
chr10_1353542_A_G	10	1353542	-	T/C	H	H	H	B	B	B	H	H	B	H	B	H	B	B	A	B	B	B	B	A	B	B	A	H	B	H	B	B	H	B	B	A	B	B	B	B	H	A	H	B	H	H	B	A	B
chr10_13545328_C_T	10	13545328	-	T/C	B	B	B	B	B	B	B	H	B	B	B	B	B	B	B	B	B	B	B	B	B	B	B	B	U	B	B	B	B	B	B	A	B	B	B	B	B	B	H	B	B	B	B	B	B
chr10_13563336_C_T	10	13563336	+	A/G	A	A	H	A	A	A	H	H	A	A	A	A	H	A	A	A	A	A	A	A	A	A	A	A	A	A	A	A	A	A	A	B	A	A	A	A	A	A	H	A	A	A	A	A	A
chr10_13565051_C_T	10	13565051	+	A/G	A	A	A	A	A	A	A	A	A	A	A	A	A	A	H	A	A	A	A	A	A	A	A	A	A	A	A	A	A	A	A	A	A	A	A	A	H	A	H	A	A	A	A	A	A
chr10_1358731_A_C	10	1358731	+	A/C	H	A	H	A	A	U	H	A	A	A	A	A	A	A	B	A	A	A	A	A	A	A	A	H	A	A	A	A	H	A	A	H	A	A	A	A	A	A	A	A	A	A	A	H	A
chr10_138539_A_C	10	138539	-	T/G	H	B	B	B	B	B	B	B	B	B	B	B	B	B	H	B	B	B	B	B	B	B	B	B	B	B	B	B	H	B	B	B	B	B	B	B	B	B	A	B	B	B	B	A	B
chr10_1393887_A_G	10	1393887	+	A/G	B	B	H	B	B	B	H	B	B	B	B	B	B	B	A	B	B	B	B	B	B	B	B	H	B	B	B	B	B	B	B	B	B	B	B	B	B	B	B	B	B	B	B	B	B
chr10_1421120_A_G	10	1421120	+	A/G	A	A	H	A	A	A	H	H	A	A	A	A	A	A	B	A	A	A	A	A	A	A	A	H	A	A	A	A	A	A	A	H	A	A	A	A	A	A	H	A	A	A	A	A	A
chr10_1430111_A_G	10	1430111	+	A/G	A	H	A	A	A	U	H	A	A	H	A	A	H	A	A	A	A	H	A	A	A	H	A	H	A	H	H	H	H	H	A	A	A	A	H	H	H	A	H	H	H	A	A	H	A
chr10_14391701_G_T	10	14391701	-	T/G	A	A	U	A	A	U	H	A	A	A	A	A	A	A	A	A	A	A	A	A	A	A	A	A	A	A	A	A	A	A	A	H	A	A	A	A	H	A	A	A	A	A	A	A	A
chr10_14395705_A_G	10	14395705	-	T/C	H	A	A	A	A	A	A	H	A	A	A	A	H	A	B	A	A	A	A	A	A	A	A	A	A	A	A	A	H	A	A	H	A	A	A	A	A	A	H	A	A	A	A	H	A
chr10_14443397_G_T	10	14443397	+	A/C	H	A	H	A	A	A	H	A	A	A	A	A	A	A	A	A	A	A	A	A	A	A	A	A	A	A	A	A	H	A	A	H	A	A	A	A	H	A	A	A	A	A	A	H	A
chr10_14457021_C_T	10	14457021	+	A/G	A	A	A	A	A	A	A	B	A	A	A	A	A	A	B	A	A	A	A	A	A	A	A	A	A	A	A	A	A	A	A	B	A	A	A	A	A	A	H	A	A	A	A	A	A
chr10_1454013_A_G	10	1454013	-	T/C	H	A	H	A	A	A	H	A	A	A	A	A	A	A	B	A	A	A	A	A	A	A	A	H	A	A	A	A	H	A	A	H	A	A	A	A	H	A	A	A	A	A	A	H	A
chr10_14727059_A_G	10	14727059	-	T/C	H	A	H	A	A	A	H	H	H	A	A	A	H	A	H	A	A	A	A	B	A	A	H	A	A	A	A	A	H	A	A	B	A	A	A	A	H	H	H	A	A	A	A	H	A
chr10_14761015_A_G	10	14761015	+	A/G	B	B	B	B	B	B	B	H	B	B	B	B	B	B	B	B	B	B	B	B	B	B	B	B	B	B	B	B	B	B	B	H	B	B	B	B	B	B	H	B	B	B	B	H	B
chr10_14790259_C_T	10	14790259	-	T/C	H	B	B	B	B	B	B	B	B	B	B	B	B	B	B	B	B	B	B	B	B	B	B	B	B	B	B	B	H	B	B	B	B	B	B	B	B	B	B	B	B	B	B	H	B
chr10_14805534_C_T	10	14805534	+	A/G	A	A	A	A	A	A	A	A	A	A	A	A	H	A	H	A	A	A	A	A	A	A	A	A	A	A	A	A	A	A	A	A	A	A	A	A	A	A	A	A	A	A	A	A	A
chr10_14814779_A_G	10	14814779	+	A/G	B	B	B	B	B	U	H	B	B	B	B	B	B	B	H	B	B	B	B	H	H	B	B	H	B	B	B	B	H	H	B	B	B	B	B	H	H	H	H	H	B	B	B	B	B
chr10_14925084_A_G	10	14925084	-	T/C	H	B	H	B	B	B	H	B	B	B	B	B	B	B	B	B	B	B	B	B	B	B	B	B	B	B	B	B	H	B	B	H	B	B	B	B	B	B	B	B	B	B	B	H	B
chr10_14953379_C_T	10	14953379	-	T/C	H	B	H	B	B	B	H	H	B	B	B	B	H	B	A	A	B	H	B	B	B	B	B	B	B	B	H	B	H	B	B	A	B	B	B	B	H	B	H	B	B	B	B	H	B
chr10_15022388_A_G	10	15022388	+	A/G	A	A	A	A	A	A	A	H	A	A	A	A	H	A	B	A	A	A	A	H	A	A	A	A	A	A	A	A	A	A	A	H	A	A	A	A	H	H	H	A	A	A	A	A	A
chr10_15028825_A_G	10	15028825	+	A/G	H	H	H	H	A	U	H	A	H	H	A	A	B	A	B	B	A	B	A	B	A	A	B	A	A	H	H	H	H	A	A	H	H	H	H	H	H	H	A	H	H	A	A	B	A
chr10_1505500_G_T	10	1505500	-	T/G	A	B	A	B	B	U	A	B	B	B	B	H	H	B	A	B	B	B	A	H	A	B	H	B	B	B	H	B	H	B	B	H	B	B	B	H	H	B	B	B	B	H	U	H	U
chr10_15075054_A_C	10	15075054	+	A/C	B	B	B	B	B	B	B	B	B	B	B	B	B	B	H	B	B	B	B	B	B	B	B	B	B	B	B	B	B	B	B	B	B	B	B	B	H	B	B	B	B	B	B	B	B
chr10_15121082_C_T	10	15121082	-	T/C	B	B	B	B	B	B	B	B	B	B	B	B	A	B	H	B	B	B	B	B	B	B	A	B	B	B	B	B	B	B	B	B	B	B	B	B	A	A	B	B	B	B	B	B	U
chr10_15149602_G_T	10	15149602	+	A/C	H	B	H	B	B	U	H	B	B	B	B	B	B	B	B	B	B	B	B	B	B	B	B	B	B	B	B	B	H	B	B	H	B	B	B	B	B	B	B	B	B	B	B	H	B
chr10_15151768_A_G	10	15151768	-	T/C	B	B	B	B	B	B	B	B	B	B	B	B	A	B	A	B	B	B	B	B	B	B	B	B	B	B	B	B	B	B	B	B	B	B	B	B	B	B	B	B	B	B	B	B	B
chr10_1516249_A_G	10	1516249	+	A/G	H	A	A	A	A	A	A	A	A	A	A	A	A	A	H	A	A	A	A	A	A	A	A	H	A	A	A	A	H	A	A	H	A	A	A	A	A	A	A	A	A	A	A	H	A
chr10_15193356_A_G	10	15193356	+	A/G	A	A	A	A	A	A	A	A	A	A	A	A	A	A	A	A	A	A	A	A	A	A	A	A	A	A	A	A	A	A	A	A	A	A	A	A	H	A	A	A	A	A	A	A	A
chr10_15201502_A_G	10	15201502	+	A/G	A	A	A	A	A	A	A	A	A	A	A	A	H	A	A	A	A	A	A	U	A	A	A	A	A	A	A	A	A	A	A	A	A	A	A	A	A	A	A	A	A	A	A	A	A
chr10_15228603_A_C	10	15228603	-	T/G	H	A	H	A	A	U	H	A	A	A	A	A	A	A	B	A	A	A	A	A	A	A	A	A	A	A	A	A	U	A	A	H	A	A	A	A	H	A	A	A	A	A	A	H	A
chr10_15263611_A_G	10	15263611	+	A/G	H	A	H	A	A	U	H	A	A	A	A	A	A	A	A	A	A	A	A	A	A	A	A	A	A	A	A	A	H	A	A	H	A	A	A	A	A	A	A	A	A	A	A	H	A
chr10_15286183_A_C	10	15286183	+	A/C	A	A	A	A	A	A	A	A	A	A	A	A	B	A	B	A	A	A	A	A	A	A	A	A	A	A	A	A	A	A	A	A	A	A	A	A	A	A	A	A	A	A	A	A	A
chr10_15435307_A_G	10	15435307	-	T/C	H	B	H	B	B	B	H	B	B	B	B	B	H	B	H	B	B	B	B	B	B	B	B	B	B	B	B	B	H	B	B	H	B	B	B	B	H	B	B	B	B	B	B	H	B
chr10_15437710_C_T	10	15437710	+	A/G	B	B	B	B	B	B	B	B	B	B	B	B	H	B	H	B	B	B	B	B	B	B	B	B	B	B	B	B	B	B	B	B	B	B	B	B	B	B	B	B	B	B	B	B	B
chr10_15447749_A_C	10	15447749	-	T/G	A	A	A	A	A	A	A	H	A	A	A	A	A	A	A	A	A	A	A	A	A	A	A	A	A	A	A	A	A	A	A	H	A	A	A	A	A	A	H	A	A	A	A	A	A
chr10_15520094_C_T	10	15520094	-	T/C	A	A	A	A	A	A	A	H	A	A	A	A	H	A	B	A	A	A	A	A	A	A	A	A	A	A	A	A	A	A	A	H	A	A	A	A	A	A	H	A	A	A	A	A	A
chr10_15521152_C_T	10	15521152	-	T/C	A	A	A	A	A	A	A	H	A	A	A	A	H	A	B	A	A	A	A	A	A	A	A	A	A	A	A	A	A	A	A	H	A	A	A	A	A	A	H	A	A	A	A	A	A
chr10_15546181_G_T	10	15546181	-	T/G	H	A	H	A	A	U	H	A	A	A	A	A	A	A	A	A	A	A	A	A	A	A	A	A	A	A	A	A	H	A	A	H	A	A	A	A	A	A	A	A	A	A	A	H	A
chr10_15563249_C_T	10	15563249	+	A/G	H	A	H	A	A	H	H	A	A	U	A	A	A	A	A	U	A	U	A	A	A	A	A	A	A	A	U	A	H	A	A	H	A	A	A	U	A	A	A	U	A	A	A	B	A
chr10_15570998_A_G	10	15570998	+	A/G	B	B	B	B	B	B	B	B	B	B	B	B	B	B	B	B	B	B	B	B	B	B	B	B	B	B	B	B	B	B	B	B	B	B	B	B	B	B	B	B	B	B	B	B	B
chr10_1581644_A_G	10	1581644	+	A/G	H	A	A	A	A	A	A	A	A	A	A	A	A	A	B	A	A	A	A	A	A	A	A	H	A	A	A	A	H	A	A	H	A	A	A	A	H	A	A	A	A	A	A	H	A
chr10_1589730_C_T	10	1589730	+	A/G	H	A	A	A	A	A	A	A	A	A	A	A	A	A	B	A	A	A	A	A	A	A	A	H	A	A	A	A	H	A	A	H	A	A	A	A	H	A	A	A	A	A	A	H	A
chr10_1616598_C_T	10	1616598	+	A/G	B	A	H	A	A	A	H	H	A	A	A	A	H	A	B	A	A	A	A	A	A	A	A	H	A	A	A	A	H	A	A	H	A	A	A	A	H	A	A	A	A	A	A	H	A
chr10_16416626_A_G	10	16416626	+	A/G	B	B	B	B	U	B	B	B	B	B	B	B	B	H	B	B	H	B	B	B	H	B	B	B	B	B	B	B	H	B	H	B	B	B	A	B	H	B	B	B	B	H	B	B	B
chr10_16418120_C_T	10	16418120	+	A/G	B	B	B	B	B	B	B	B	B	B	B	B	H	B	B	B	B	B	B	B	B	B	B	B	B	B	B	B	B	B	B	B	B	B	B	B	B	B	B	B	B	B	B	B	B
chr10_16419902_A_G	10	16419902	-	T/C	A	A	A	A	A	A	A	A	A	A	A	A	A	A	A	A	A	A	A	A	A	A	A	A	A	A	A	A	A	A	A	A	A	A	A	A	A	A	A	A	A	A	A	A	A
chr10_16430008_C_T	10	16430008	+	A/G	B	B	H	B	B	B	H	B	B	B	B	B	B	B	B	B	B	B	B	B	B	B	B	B	B	B	B	B	B	B	B	H	B	B	B	B	B	B	B	B	B	B	B	B	B
chr10_1643390_C_T	10	1643390	+	A/G	A	A	A	A	A	A	A	A	A	A	A	A	A	A	H	A	A	A	A	A	A	A	A	A	A	A	A	A	A	A	A	A	A	A	A	A	A	A	A	A	A	A	A	A	A
chr10_16445761_A_G	10	16445761	-	T/C	B	B	B	B	B	B	B	H	B	B	B	B	B	B	B	B	B	B	B	B	B	B	B	B	B	B	B	B	B	B	B	H	B	B	B	B	B	B	H	B	B	B	B	B	B
chr10_16530827_A_G	10	16530827	+	A/G	A	U	H	B	A	H	B	H	H	H	A	H	A	H	A	A	B	U	H	B	H	U	A	H	H	H	H	H	A	H	H	B	U	U	A	B	A	A	B	H	U	H	H	A	H
chr10_16539119_C_T	10	16539119	-	T/C	A	A	H	A	A	A	H	H	A	A	A	A	A	A	A	A	A	A	A	A	A	A	A	A	A	A	A	A	A	A	A	B	A	A	A	A	A	A	H	A	A	A	A	A	A
chr10_16569585_G_T	10	16569585	-	T/G	A	A	A	A	A	A	A	A	A	A	A	A	A	A	A	A	A	A	A	A	A	A	A	A	A	A	A	A	A	A	A	A	A	A	A	A	A	A	A	A	A	A	A	A	A
chr10_16591343_A_G	10	16591343	-	T/C	B	B	B	B	B	B	B	H	B	B	B	B	H	B	H	B	B	B	B	B	B	B	B	B	B	B	B	B	B	B	H	H	B	B	B	H	B	B	H	B	B	U	B	U	B
chr10_16607447_A_G	10	16607447	-	T/C	U	B	H	B	B	B	B	B	H	B	B	B	B	B	B	B	B	B	B	B	B	B	B	U	H	B	B	B	U	B	B	B	B	B	B	B	H	B	H	B	B	B	B	H	B
chr10_16609803_A_G	10	16609803	+	A/G	A	A	H	A	A	U	H	A	A	A	A	A	A	A	A	A	A	A	A	A	A	A	A	A	A	A	A	A	A	A	A	H	A	A	A	A	A	A	A	A	A	A	A	A	A
chr10_16637143_A_G	10	16637143	+	A/G	B	B	H	B	B	B	H	B	B	B	B	B	B	B	B	B	B	B	B	B	B	B	B	B	B	B	B	B	B	B	B	H	B	B	B	B	B	B	B	B	B	B	B	B	B
chr10_16637757_A_G	10	16637757	+	A/G	H	A	A	A	H	A	A	H	A	A	A	A	B	A	B	A	A	A	A	A	A	H	A	A	A	A	A	H	H	A	A	H	A	A	A	A	H	A	H	A	A	A	A	H	A
chr10_1665786_A_G	10	1665786	-	T/C	B	B	B	B	B	B	B	B	B	B	B	B	B	B	B	B	B	B	B	B	B	B	B	B	B	B	B	B	B	B	B	H	B	B	B	B	H	B	H	B	B	B	B	B	B
chr10_16720337_C_T	10	16720337	+	A/G	A	B	B	B	B	B	B	H	B	B	B	B	H	B	A	B	B	B	B	B	B	B	B	B	B	B	B	B	H	B	B	H	B	B	B	B	H	B	H	B	B	B	B	H	B
chr10_16720740_A_G	10	16720740	-	T/C	B	H	A	A	A	A	A	H	A	H	A	A	H	A	B	A	A	A	A	H	A	A	A	A	H	H	A	A	H	A	A	H	A	A	A	A	H	H	H	A	H	A	A	H	H
chr10_1674923_A_G	10	1674923	+	A/G	B	B	A	B	B	B	H	B	B	B	B	B	B	B	A	B	B	B	B	B	B	B	B	B	B	B	B	B	B	B	B	B	B	B	B	B	B	B	B	B	B	B	B	B	U
chr10_16834749_A_G	10	16834749	-	T/C	H	B	H	B	B	B	H	B	B	B	B	B	B	B	B	B	B	B	B	B	B	B	B	B	B	B	B	B	H	B	B	H	B	H	B	B	B	B	B	B	B	B	B	H	B
chr10_17018187_A_C	10	17018187	-	T/G	H	A	A	A	A	A	A	A	A	A	A	A	A	A	A	A	A	A	A	A	A	A	A	A	A	A	A	A	H	A	A	H	A	A	A	A	A	A	A	A	A	A	A	H	A
chr10_1711374_A_C	10	1711374	+	A/C	A	A	A	A	A	A	A	A	A	A	A	A	A	A	H	A	A	A	A	A	A	A	A	A	A	A	A	A	A	A	A	A	A	A	A	A	A	A	A	A	A	A	A	A	A
chr10_17147081_A_C	10	17147081	+	A/C	U	A	B	A	A	U	B	A	A	A	A	B	H	B	B	A	U	B	A	A	A	A	H	U	A	A	A	A	A	B	A	B	A	A	A	H	A	A	A	H	A	A	U	B	A
chr10_17201894_A_G	10	17201894	-	T/C	A	A	A	A	A	A	A	H	A	A	A	A	A	A	A	A	A	A	A	A	A	A	A	A	A	A	A	A	A	A	A	A	A	A	A	A	A	A	H	A	A	A	A	A	A
chr10_17219752_A_G	10	17219752	+	A/G	B	B	B	B	B	B	B	B	B	B	B	B	H	B	A	B	B	B	B	B	B	B	B	B	B	B	B	B	B	B	B	H	B	B	B	B	B	B	B	B	B	B	B	B	B
chr10_17243441_G_T	10	17243441	+	A/C	B	B	B	B	B	B	B	H	B	B	B	B	B	B	A	B	B	B	B	B	B	B	B	B	B	B	B	B	B	B	B	H	B	B	B	B	H	B	H	B	B	B	B	B	B
chr10_17265173_A_G	10	17265173	+	A/G	A	A	A	A	A	A	A	A	A	A	A	A	A	A	A	A	A	H	A	H	A	A	A	A	A	A	H	A	A	H	A	H	A	A	H	A	H	A	A	H	A	A	A	A	A
chr10_17281922_A_G	10	17281922	+	A/G	B	B	B	B	B	B	B	H	B	B	B	B	B	B	B	B	B	B	B	B	B	B	B	B	B	B	B	B	B	B	B	B	B	B	B	B	H	B	H	B	B	B	B	B	B
chr10_17307857_C_T	10	17307857	-	T/C	B	B	B	B	B	B	B	H	B	B	B	B	B	B	B	B	B	B	B	B	B	B	B	B	B	B	B	B	B	B	B	B	B	B	B	B	H	B	H	B	B	B	B	B	B
chr10_17318246_A_G	10	17318246	+	A/G	B	B	B	B	B	B	B	B	B	B	B	B	B	B	B	B	B	B	B	B	B	B	B	B	B	B	B	B	B	B	B	B	B	B	B	B	H	B	B	B	B	B	B	B	B
chr10_17403870_C_T	10	17403870	-	T/C	A	A	H	A	A	U	H	A	A	A	A	A	A	A	A	A	A	A	A	A	A	A	A	A	A	A	A	A	A	A	A	H	A	A	A	A	A	A	A	A	A	A	A	A	A
chr10_17432785_G_T	10	17432785	+	A/C	B	B	B	B	B	B	B	B	B	B	B	B	B	B	H	B	B	B	B	B	B	B	B	B	B	B	B	B	B	B	B	B	B	B	B	B	B	B	B	B	B	B	B	B	B
chr10_17435940_C_T	10	17435940	-	T/C	H	B	B	H	H	B	B	H	B	B	B	B	B	B	H	B	B	H	B	B	B	H	B	B	B	B	B	B	A	B	B	H	B	B	B	H	A	B	A	H	B	B	B	H	B
chr10_1748241_A_G	10	1748241	-	T/C	H	B	B	B	B	B	B	B	B	B	B	B	B	B	A	B	B	B	B	B	B	B	B	B	B	B	B	B	H	B	B	A	B	B	B	B	H	B	H	B	B	B	B	H	B
chr10_17516525_A_C	10	17516525	+	A/C	A	A	A	A	A	A	A	A	A	A	A	A	A	A	A	A	A	A	A	A	A	A	A	A	A	A	A	A	A	A	A	A	A	A	A	A	A	A	A	A	A	A	A	A	A
chr10_17532148_A_G	10	17532148	+	A/G	B	B	H	B	B	B	H	B	B	B	B	B	B	B	B	B	B	B	B	B	B	B	B	B	B	B	B	B	B	B	B	H	B	B	B	B	B	B	B	B	B	B	B	B	B
chr10_17561639_C_T	10	17561639	+	A/G	B	B	B	B	B	B	B	B	B	B	B	B	H	B	H	B	B	B	B	B	B	B	B	B	B	B	B	B	B	B	B	H	B	B	B	B	B	B	B	B	B	B	B	B	B
chr10_17575959_C_T	10	17575959	+	A/G	H	B	B	B	B	B	B	B	B	B	B	B	B	B	B	B	B	B	B	B	B	B	B	B	B	B	B	B	H	B	B	B	B	B	B	B	H	B	B	B	B	B	B	H	B
chr10_17692954_A_G	10	17692954	+	A/G	H	A	H	A	A	A	H	H	A	A	A	A	H	A	H	A	A	A	A	A	A	A	A	A	A	A	A	A	H	A	A	B	A	A	A	A	H	A	H	A	A	A	A	H	A
chr10_17722964_C_T	10	17722964	-	T/C	A	A	A	A	A	A	A	A	A	A	A	A	A	A	A	A	A	A	A	A	A	A	A	A	A	A	A	A	A	A	A	A	A	A	A	A	A	A	A	A	A	A	A	A	A
chr10_17723657_A_C	10	17723657	-	T/G	B	B	B	B	B	B	B	B	B	B	B	B	H	B	H	B	B	B	B	B	B	B	B	B	B	B	B	B	B	B	B	B	B	B	B	B	B	B	B	B	B	B	B	B	B
chr10_1777966_A_G	10	1777966	-	T/C	A	H	H	H	B	B	H	H	B	H	B	B	A	B	H	H	B	B	B	H	B	B	B	U	B	H	H	A	A	H	B	A	H	B	B	H	H	H	A	B	H	B	B	A	B
chr10_17787494_A_G	10	17787494	+	A/G	H	A	A	A	A	A	A	H	A	A	A	A	H	A	B	A	A	A	A	A	A	A	A	A	A	A	A	A	H	A	A	H	A	A	A	A	H	A	H	A	A	A	A	H	A
chr10_17794480_A_G	10	17794480	-	T/C	B	B	B	B	H	B	B	B	B	B	B	B	B	U	A	B	A	B	B	B	B	B	B	B	B	B	B	B	B	B	B	A	B	B	B	B	B	B	B	B	B	B	B	B	B
chr10_17880717_A_G	10	17880717	+	A/G	B	H	B	H	H	A	H	H	B	H	A	B	A	B	B	A	B	A	B	A	B	H	H	H	B	H	A	A	H	B	B	H	H	H	A	A	H	U	H	A	H	H	B	H	H
chr10_17897826_A_G	10	17897826	-	T/C	B	B	H	B	B	B	H	B	B	B	B	B	B	B	B	B	B	U	B	B	B	B	B	B	B	B	B	B	B	B	B	B	B	B	B	B	B	B	B	B	B	B	B	B	B
chr10_17945754_C_T	10	17945754	+	A/G	B	B	B	B	B	B	B	B	B	B	B	B	B	B	H	B	B	B	B	B	B	B	B	B	B	B	B	B	B	B	B	H	B	B	B	B	B	B	B	B	B	B	B	B	B
chr10_17962082_C_T	10	17962082	+	A/G	B	B	B	B	B	B	B	B	B	B	B	B	B	B	H	B	B	B	B	B	B	B	B	B	B	B	B	B	B	B	B	H	B	B	B	B	B	B	B	B	B	B	B	B	B
chr10_17990933_A_C	10	17990933	-	T/G	A	A	A	A	A	A	A	A	A	A	A	A	A	A	A	A	A	A	A	A	A	A	A	A	A	A	A	A	A	A	A	B	A	A	A	A	A	A	A	A	A	A	U	A	A
chr10_18044328_A_G	10	18044328	-	T/C	H	B	H	B	B	B	H	B	B	B	B	B	B	B	H	U	B	B	B	B	B	B	B	B	B	B	B	B	H	B	B	B	B	B	B	B	H	B	B	B	B	B	B	H	B
chr10_18050821_A_C	10	18050821	-	T/G	H	A	H	A	A	U	H	A	A	A	A	A	A	A	A	A	A	A	A	A	A	A	A	A	A	A	A	A	H	A	A	A	A	A	A	A	H	A	A	A	A	A	A	H	A
chr10_1806735_A_G	10	1806735	-	T/C	A	A	A	A	A	U	B	A	A	A	A	A	A	A	A	U	A	A	A	A	A	A	A	A	A	A	U	A	A	A	A	H	A	A	A	U	A	A	A	U	A	A	A	A	A
chr10_18079556_C_T	10	18079556	+	A/G	H	B	H	B	B	B	H	B	B	B	B	B	B	B	B	B	B	B	B	B	B	B	B	B	B	B	B	B	H	B	B	B	B	B	B	B	H	B	B	B	B	B	B	H	B
chr10_1809950_C_T	10	1809950	-	T/C	H	H	H	H	A	B	B	A	A	H	A	A	B	A	B	B	A	H	A	A	A	H	A	H	A	H	B	H	B	H	A	B	H	A	H	B	H	A	B	B	H	H	A	B	A
chr10_1812151_A_G	10	1812151	+	A/G	B	B	H	B	B	B	H	B	B	B	B	B	H	B	B	B	B	B	B	H	B	B	H	B	B	B	B	B	B	B	B	H	B	B	B	B	B	B	H	B	B	B	B	B	B
chr10_1836621_C_T	10	1836621	+	A/G	A	H	H	H	H	A	A	H	A	A	B	H	A	H	A	A	H	A	A	H	H	A	H	U	H	H	A	A	A	H	B	A	H	U	H	A	H	A	A	A	H	B	B	A	B
chr10_1871880_C_T	10	1871880	-	T/C	B	B	H	B	B	B	B	H	B	B	B	B	H	B	A	B	B	B	B	B	B	B	B	H	B	B	B	B	B	B	B	H	B	B	B	B	H	B	H	B	B	B	B	B	B
chr10_1889028_A_G	10	1889028	+	A/G	B	H	A	H	A	U	H	A	A	H	A	A	H	A	A	B	A	B	A	A	A	A	A	A	A	H	H	A	H	A	A	H	H	A	B	H	H	A	A	B	H	H	A	H	A
chr10_1900530_C_T	10	1900530	+	A/G	H	H	B	H	B	A	H	B	B	H	B	B	H	B	B	A	B	H	B	B	B	B	B	B	B	H	H	B	H	B	B	H	H	B	H	H	H	B	B	A	H	H	B	H	B
chr10_193770_A_G	10	193770	+	A/G	H	B	B	B	B	B	H	H	B	B	B	B	H	B	A	B	B	B	B	B	B	B	B	B	B	B	B	B	H	B	B	A	B	B	B	B	H	B	B	B	B	B	B	H	B
chr10_1940300_A_G	10	1940300	+	A/G	B	B	B	B	B	B	B	B	B	B	B	B	B	B	H	B	B	B	B	B	B	B	B	B	B	B	B	B	B	B	B	B	B	B	B	B	B	B	H	B	B	B	B	B	B
chr10_1989600_G_T	10	1989600	+	A/C	B	B	H	B	B	B	B	B	B	B	B	B	B	B	H	B	B	B	B	B	B	B	B	H	B	B	B	B	B	B	B	H	B	B	B	B	H	B	B	B	B	B	B	B	B
chr10_1998463_A_G	10	1998463	-	T/C	B	B	H	B	B	B	B	B	B	B	B	B	B	B	H	B	B	B	B	B	B	B	B	B	B	B	B	B	B	B	B	H	B	B	B	B	H	B	B	B	B	B	B	B	B
chr10_2044634_C_T	10	2044634	-	T/C	H	B	B	B	B	B	B	B	B	B	B	B	B	B	B	B	B	B	B	B	B	B	B	B	B	B	B	B	H	B	B	H	B	B	B	B	B	B	B	B	B	B	B	H	B
chr10_2061894_C_T	10	2061894	-	T/C	B	B	B	B	B	B	B	B	B	B	B	B	A	B	B	U	B	U	B	B	B	B	B	B	B	B	U	U	B	B	B	B	B	B	U	U	B	B	B	U	B	B	B	B	B
chr10_2095152_C_T	10	2095152	-	T/C	H	A	A	A	A	A	A	A	A	A	A	A	A	A	H	A	A	A	A	A	A	A	A	A	A	A	A	A	H	A	A	H	A	A	A	A	A	A	A	A	A	A	A	H	A
chr10_2126851_C_T	10	2126851	-	T/C	B	B	H	B	B	B	H	H	B	B	B	B	H	B	A	B	B	B	B	B	B	B	B	B	B	B	B	B	B	B	B	H	B	B	B	B	H	B	H	B	B	B	B	B	B
chr10_2127485_A_G	10	2127485	-	T/C	H	B	B	B	B	B	B	B	B	B	B	B	B	B	B	B	B	B	B	B	B	B	B	B	B	B	B	B	H	B	B	H	B	B	B	B	B	B	B	B	B	B	B	H	B
chr10_2131774_C_T	10	2131774	-	T/C	B	B	B	B	B	B	B	B	B	B	B	B	B	B	H	B	B	B	B	B	B	B	B	B	B	B	B	B	B	B	B	B	B	B	B	B	H	B	B	B	B	B	B	B	B
chr10_2146019_A_G	10	2146019	+	A/G	H	B	H	B	B	U	H	H	B	B	B	H	H	B	H	B	B	B	B	H	B	B	B	H	B	B	B	B	H	B	B	A	B	B	B	B	H	B	H	B	B	B	B	H	B
chr10_2330562_C_T	10	2330562	-	T/C	A	A	A	A	A	A	A	A	A	A	A	A	A	A	H	A	A	A	A	A	A	A	A	A	A	A	A	A	A	A	A	A	A	A	A	A	A	A	A	A	A	A	A	A	A
chr10_2361917_C_T	10	2361917	-	T/C	A	A	A	A	A	A	A	A	A	A	A	A	A	A	A	A	A	A	A	A	A	A	A	A	A	A	A	A	A	A	A	A	A	A	A	A	A	A	H	A	A	A	A	A	A
chr10_2382874_A_G	10	2382874	+	A/G	H	B	B	B	H	B	H	H	A	H	H	H	B	H	H	B	H	H	H	H	A	H	A	H	H	B	B	H	B	B	H	B	B	H	H	B	B	H	B	B	B	H	B	B	B
chr10_2435910_C_T	10	2435910	-	T/C	H	A	A	A	A	U	H	A	A	A	A	A	H	A	B	A	A	A	A	A	A	A	A	A	A	A	A	A	H	A	A	H	A	A	A	A	H	A	H	A	A	A	A	H	A
chr10_2446322_A_G	10	2446322	-	T/C	A	A	H	A	A	A	A	H	A	A	A	A	A	A	A	A	A	A	A	A	A	A	A	A	A	A	A	A	A	A	A	H	A	A	A	A	A	A	A	A	A	A	A	A	A
chr10_2475344_A_G	10	2475344	+	A/G	A	A	H	A	A	A	A	H	A	A	A	A	A	A	A	A	A	A	A	A	A	A	A	A	A	A	A	A	A	A	A	H	A	A	A	A	A	A	A	A	A	A	A	A	A
chr10_2509058_C_T	10	2509058	-	T/C	U	H	B	A	H	A	B	B	U	H	A	B	H	B	B	B	A	B	A	B	U	H	B	B	B	B	B	B	B	B	A	B	A	B	B	B	B	B	H	B	H	A	A	B	U
chr10_2513521_A_G	10	2513521	+	A/G	A	H	A	H	A	B	B	A	A	H	A	A	H	A	H	B	A	H	A	A	A	H	A	U	A	H	B	H	H	H	A	A	H	A	A	B	H	A	H	B	H	H	A	H	A
chr10_2541068_G_T	10	2541068	+	A/C	A	A	A	A	A	A	A	A	A	A	A	A	H	A	H	A	A	A	A	A	A	A	A	A	A	A	A	A	A	A	A	A	A	A	A	A	A	A	A	A	A	A	A	A	A
chr10_2571405_C_T	10	2571405	+	A/G	H	B	B	B	B	B	B	B	B	B	H	A	B	B	B	U	B	B	H	B	A	A	B	H	B	B	B	B	H	B	A	H	B	B	B	B	H	B	B	U	B	B	B	A	B
chr10_2590369_A_G	10	2590369	+	A/G	A	A	H	A	A	A	A	H	A	A	A	A	A	A	H	A	A	A	A	A	A	A	A	A	A	A	A	A	A	A	A	H	A	A	A	A	H	A	A	A	A	A	A	A	A
chr10_2606228_A_G	10	2606228	+	A/G	H	B	B	B	B	B	H	B	B	B	B	B	B	B	B	B	B	B	B	B	B	B	B	B	B	B	B	B	H	B	B	H	B	B	B	B	B	B	B	B	B	B	B	H	B
chr10_2637728_A_G	10	2637728	-	T/C	H	B	H	B	B	U	H	H	B	B	B	B	H	B	H	B	B	B	B	B	B	B	B	B	B	B	B	B	H	B	B	A	B	B	B	B	B	B	B	B	B	B	B	H	B
chr10_2665139_A_G	10	2665139	+	A/G	B	B	B	B	B	B	B	B	B	B	B	B	B	B	B	B	U	B	B	B	U	U	U	U	B	B	B	B	B	B	B	B	B	B	B	B	B	B	B	B	B	U	B	B	B
chr10_266633_C_T	10	266633	-	T/C	A	A	H	A	A	A	A	A	A	A	A	A	H	A	A	H	A	A	A	A	A	A	A	H	A	A	A	A	A	A	A	H	A	A	A	A	A	A	H	A	A	A	A	A	A
chr10_2671493_A_C	10	2671493	+	A/C	A	A	A	A	A	A	A	A	A	A	A	A	A	A	H	A	A	A	A	A	A	A	A	A	A	A	A	A	A	A	A	A	A	A	A	A	A	A	H	A	A	A	A	A	A
chr10_268859_C_T	10	268859	+	A/G	A	A	H	A	A	A	A	A	A	A	A	A	H	A	A	A	A	A	A	A	A	A	A	H	A	A	A	A	A	A	A	H	A	A	A	A	A	A	H	A	A	A	A	A	A
chr10_2730976_C_T	10	2730976	-	T/C	H	H	B	H	B	U	B	B	B	H	B	H	A	B	H	A	B	H	B	A	B	H	B	H	B	H	A	H	A	H	B	H	H	B	H	A	A	H	A	A	H	H	B	A	B
chr10_2743802_A_G	10	2743802	+	A/G	B	H	H	H	B	U	H	H	B	H	B	H	H	B	H	A	B	H	B	H	B	H	B	H	B	H	A	H	B	H	B	A	H	B	H	A	B	B	H	A	H	H	B	A	B
chr10_2773664_C_T	10	2773664	-	T/C	A	A	A	A	A	A	A	A	A	A	A	A	H	A	H	A	A	A	A	A	A	A	A	A	A	A	A	A	A	A	A	A	A	A	A	A	A	A	U	A	A	A	A	A	A
chr10_2796254_C_T	10	2796254	-	T/C	A	A	A	A	A	A	A	A	A	A	A	A	H	A	H	A	A	A	A	A	A	A	A	H	A	A	A	A	A	A	A	A	A	A	A	A	H	A	H	A	A	A	A	A	A
chr10_2808199_A_C	10	2808199	+	A/C	A	A	A	A	A	A	A	A	A	A	A	A	A	A	H	A	A	A	A	A	A	A	A	A	A	A	A	A	A	A	A	A	A	A	A	A	A	A	H	A	A	A	A	A	A
chr10_2860636_C_T	10	2860636	+	A/G	A	A	A	A	A	A	A	A	U	A	A	A	H	A	H	A	A	A	A	A	A	A	A	A	A	A	A	A	A	A	A	A	A	A	A	A	A	A	B	A	A	A	A	A	A
chr10_2892377_C_T	10	2892377	+	A/G	B	B	H	B	B	B	H	H	B	B	B	B	B	B	H	B	B	B	B	B	B	B	B	B	B	B	B	B	B	B	B	H	B	B	B	B	H	B	B	B	B	B	B	B	B
chr10_2924682_A_C	10	2924682	+	A/C	H	B	H	H	B	U	H	H	B	B	B	B	B	B	H	B	B	B	B	B	B	B	B	B	B	B	B	B	A	B	B	A	B	B	B	B	H	B	B	B	B	B	B	U	B
chr10_2956149_A_G	10	2956149	+	A/G	B	B	B	B	B	B	B	B	B	B	B	B	H	B	H	B	B	B	B	B	B	B	B	B	B	B	B	B	B	B	B	B	B	B	B	B	B	B	H	B	B	B	B	B	B
chr10_2974888_G_T	10	2974888	+	A/C	B	B	B	B	B	B	B	B	B	B	B	B	H	B	H	B	B	B	B	B	B	B	B	B	B	B	B	B	B	B	B	B	B	B	B	B	B	B	H	B	B	B	B	B	B
chr10_2988887_A_G	10	2988887	+	A/G	A	A	A	A	A	A	A	A	A	A	A	A	H	A	A	A	A	A	U	A	A	A	A	A	A	A	A	A	A	A	A	A	A	A	A	A	A	A	H	A	A	A	A	A	A
chr10_3019420_G_T	10	3019420	+	A/C	A	A	H	A	A	A	H	H	A	A	A	A	A	A	H	A	A	A	A	A	A	A	A	A	A	A	A	A	A	A	A	H	A	A	A	A	A	A	A	A	A	A	A	A	A
chr10_304933_A_G	10	304933	-	T/C	A	H	H	B	A	H	A	H	A	B	A	A	A	A	H	H	A	A	A	A	A	H	A	U	A	H	H	A	A	H	A	H	H	A	A	H	H	A	H	H	H	A	A	A	A
chr10_3052090_A_G	10	3052090	-	T/C	B	B	H	B	B	B	H	H	B	B	B	H	B	B	A	B	B	B	B	B	B	B	B	B	B	B	B	B	B	B	B	H	B	B	B	B	H	B	H	B	B	B	B	B	B
chr10_3053663_A_G	10	3053663	-	T/C	B	B	B	B	B	U	H	B	B	B	B	B	H	B	H	B	B	B	B	B	B	B	B	B	B	B	B	B	B	B	B	B	B	B	B	B	H	B	H	B	B	B	B	B	B
chr10_3075827_G_T	10	3075827	+	A/C	A	A	A	A	A	A	H	A	A	A	A	A	A	A	H	A	A	A	A	A	A	A	A	A	A	A	A	A	A	A	A	A	A	A	A	A	A	A	A	A	A	A	A	A	A
chr10_3117522_A_C	10	3117522	+	A/C	A	A	A	A	A	A	A	A	A	A	A	A	A	A	H	A	A	A	A	A	A	A	A	A	A	A	A	A	A	A	A	A	A	A	A	A	A	A	H	A	A	A	A	A	A
chr10_3128251_G_T	10	3128251	+	A/C	H	B	B	B	B	B	B	B	A	B	B	B	B	B	B	B	B	B	B	B	B	B	B	B	B	B	B	B	H	B	B	B	B	B	B	B	H	B	B	B	B	H	B	H	B
chr10_3129889_C_T	10	3129889	-	T/C	B	A	H	A	A	A	H	B	A	A	A	A	H	A	H	A	A	A	A	A	A	A	A	A	A	A	A	A	H	A	A	H	A	A	A	A	H	A	A	A	A	A	A	H	A
chr10_3149377_C_T	10	3149377	+	A/G	B	B	B	B	B	B	B	H	B	B	B	B	B	B	B	B	B	B	B	B	B	B	B	B	B	B	B	B	B	B	B	B	B	B	B	B	H	B	H	B	B	H	B	B	B
chr10_3182199_A_G	10	3182199	-	T/C	B	B	B	B	B	B	B	B	B	B	B	B	H	B	B	B	B	U	B	B	B	B	B	B	B	B	H	B	B	B	B	B	B	B	U	H	B	B	B	B	B	B	B	B	B
chr10_3211248_A_G	10	3211248	+	A/G	B	B	H	B	B	B	B	B	B	B	B	B	B	B	H	B	B	B	B	B	B	B	B	B	B	B	B	B	B	B	B	H	B	B	B	B	B	B	B	B	B	B	B	B	B
chr10_3212222_A_G	10	3212222	-	T/C	A	A	H	A	A	A	A	A	A	A	A	A	A	A	B	A	A	A	A	A	A	A	A	A	A	A	A	A	A	A	A	H	A	A	A	A	A	A	H	A	A	A	A	A	A
chr10_3242681_A_C	10	3242681	+	A/C	A	A	H	A	H	A	A	A	A	A	A	A	A	A	B	A	A	A	A	H	A	A	B	A	A	A	A	A	A	A	A	B	A	H	A	A	H	A	A	A	A	A	A	A	A
chr10_3272656_C_T	10	3272656	-	T/C	B	B	H	B	B	B	B	H	B	B	B	B	B	B	A	B	B	B	B	B	B	B	B	B	B	B	B	B	B	B	B	H	B	B	B	B	B	B	B	B	B	B	B	B	B
chr10_3311360_A_G	10	3311360	+	A/G	B	B	B	B	B	B	H	B	B	B	B	B	B	B	B	B	B	B	B	B	B	B	B	B	B	B	B	B	B	B	B	H	B	B	B	B	B	B	B	B	B	B	B	B	B
chr10_3340446_G_T	10	3340446	-	T/G	H	B	B	B	B	B	B	B	B	B	B	B	B	B	B	B	B	B	B	B	B	B	B	B	B	B	B	B	H	B	B	B	B	B	B	B	B	B	B	B	B	B	B	H	B
chr10_335252_G_T	10	335252	-	T/G	H	A	A	A	A	A	A	A	A	A	A	A	A	A	H	A	A	A	A	A	A	A	A	A	A	A	A	A	H	A	A	A	A	A	A	A	A	A	A	A	A	A	A	H	A
chr10_3364716_A_G	10	3364716	-	T/C	A	A	A	A	A	A	H	A	A	A	A	A	A	A	A	A	A	A	A	A	A	A	A	A	A	A	A	A	A	A	A	H	A	A	A	A	H	A	A	A	A	A	A	A	A
chr10_3369931_A_G	10	3369931	+	A/G	B	B	B	B	B	B	B	H	B	B	B	B	H	B	H	B	B	B	B	B	B	B	B	B	B	B	B	B	B	B	B	B	B	B	B	B	B	B	H	B	B	B	B	B	B
chr10_3405119_A_G	10	3405119	+	A/G	A	A	H	A	A	A	A	A	A	A	A	A	A	A	H	A	A	A	A	A	A	A	A	A	A	A	A	A	A	A	A	H	A	A	A	A	A	A	A	A	A	A	A	A	A
chr10_3422095_A_G	10	3422095	+	A/G	H	H	H	H	H	A	H	H	H	H	H	H	A	H	H	H	H	H	H	H	H	H	H	H	H	H	A	H	H	H	H	H	H	H	H	A	H	H	H	H	H	H	U	H	U
chr10_345360_C_T	10	345360	+	A/G	H	A	H	A	A	A	H	A	A	A	A	A	B	A	H	A	A	A	A	A	A	A	A	H	A	A	A	A	B	A	A	A	A	A	A	A	H	A	H	A	A	A	A	H	A
chr10_3512412_C_T	10	3512412	+	A/G	H	B	H	B	B	B	H	H	B	B	B	B	B	B	H	B	B	B	B	B	B	B	B	B	B	B	B	B	H	B	B	A	B	B	B	B	H	B	B	B	B	B	B	H	B
chr10_3539536_C_T	10	3539536	+	A/G	H	B	H	B	B	B	H	H	B	B	B	B	B	B	H	B	B	B	B	B	B	B	B	B	B	B	B	B	H	B	B	H	B	B	B	B	B	B	B	B	B	B	B	H	B
chr10_3565911_A_G	10	3565911	+	A/G	B	B	B	B	B	B	H	B	B	B	B	B	B	B	B	B	B	B	B	B	B	B	B	B	B	B	B	B	B	B	B	B	B	B	H	B	B	B	B	B	B	B	B	B	B
chr10_3594848_A_G	10	3594848	-	T/C	B	B	B	B	B	B	B	B	B	B	B	B	H	B	B	B	B	B	B	B	B	B	B	B	B	B	B	B	B	B	B	B	B	B	B	B	B	B	B	B	B	B	B	B	B
chr10_3627571_A_C	10	3627571	+	A/C	H	A	A	H	A	A	A	A	A	A	A	A	B	A	B	A	A	A	A	A	A	A	A	A	A	A	H	A	B	A	A	H	H	A	A	H	B	A	H	H	A	A	A	H	A
chr10_3657504_A_C	10	3657504	+	A/C	H	B	B	B	B	B	B	B	B	B	B	B	B	B	H	B	B	B	B	B	B	B	B	B	B	B	B	B	H	B	B	B	B	B	B	B	B	B	H	B	B	B	B	H	B
chr10_367201_A_G	10	367201	+	A/G	A	A	A	A	A	A	A	A	A	A	A	A	H	A	A	A	A	A	A	A	A	A	A	A	A	A	A	A	A	A	A	H	A	A	A	A	A	A	H	A	A	A	A	A	A
chr10_3675684_A_C	10	3675684	-	T/G	H	A	H	A	A	A	A	H	A	A	A	A	H	A	H	A	A	A	A	A	A	A	A	A	A	A	A	A	H	A	A	H	A	A	A	A	H	A	H	A	A	A	A	H	A
chr10_3722750_C_T	10	3722750	+	A/G	B	B	H	B	B	U	H	H	B	B	B	B	H	B	A	B	B	B	B	B	B	B	B	B	B	B	B	B	B	B	B	H	B	B	B	B	H	B	H	B	B	B	B	B	B
chr10_3756725_C_T	10	3756725	-	T/C	B	B	B	B	B	B	B	B	B	B	B	B	H	B	B	B	B	B	B	B	B	U	B	B	B	B	B	B	B	B	B	B	B	B	B	B	B	B	B	B	B	B	B	B	B
chr10_3781008_A_G	10	3781008	-	T/C	A	A	A	A	A	A	A	A	A	A	A	A	H	A	A	A	A	A	A	A	A	A	A	A	A	A	A	A	A	A	A	A	A	A	A	A	A	A	A	A	A	A	A	A	A
chr10_3787704_C_T	10	3787704	-	T/C	H	A	H	A	A	A	H	B	A	A	A	A	H	A	H	A	A	A	A	A	A	A	A	A	A	A	A	A	H	A	A	B	A	A	A	A	A	A	A	A	A	A	A	H	A
chr10_3813472_C_T	10	3813472	-	T/C	A	A	A	A	U	A	A	A	A	A	A	A	H	A	B	A	A	A	U	A	U	A	A	A	A	A	A	A	A	A	A	A	A	A	A	A	A	A	H	A	A	A	A	A	A
chr10_3854024_C_T	10	3854024	+	A/G	H	A	A	A	A	A	A	A	A	A	A	A	A	A	H	A	A	A	A	A	A	A	A	A	A	A	A	A	H	A	A	H	A	A	A	A	H	A	A	A	A	A	A	H	A
chr10_3883611_C_T	10	3883611	-	T/C	H	B	B	B	B	B	B	B	B	B	B	B	B	B	H	B	B	B	B	B	B	B	B	B	B	B	B	B	H	B	B	H	B	B	B	B	H	B	B	B	B	B	B	H	B
chr10_3895536_C_T	10	3895536	-	T/C	H	A	A	A	A	A	A	A	A	A	A	A	A	A	H	A	A	U	A	A	A	A	A	A	A	A	A	A	H	A	A	H	A	A	A	A	H	A	A	A	A	A	A	H	A
chr10_3950232_G_T	10	3950232	+	A/C	A	A	A	A	A	A	A	A	A	A	A	A	H	A	A	A	A	A	A	A	A	A	A	A	A	A	A	A	A	A	A	H	A	A	A	A	A	A	A	A	A	H	A	A	A
chr10_4026578_A_G	10	4026578	-	T/C	H	B	B	B	B	B	B	B	B	B	B	B	B	B	B	B	B	B	B	B	B	B	B	B	B	B	B	B	H	B	B	B	B	B	B	B	H	B	B	B	B	B	B	H	B
chr10_4037020_C_T	10	4037020	-	T/C	B	B	B	B	B	B	B	B	B	B	B	B	B	B	H	U	B	B	B	B	B	B	B	B	B	B	U	B	B	B	B	B	B	B	B	U	B	B	B	B	B	B	B	B	B
chr10_4121129_A_G	10	4121129	+	A/G	B	B	B	B	B	B	B	B	B	B	B	B	B	B	B	B	B	B	B	B	B	B	B	B	B	B	B	B	B	B	B	B	B	B	B	B	B	B	B	B	B	B	B	B	B
chr10_4232058_A_C	10	4232058	+	A/C	A	A	B	A	A	A	A	H	A	A	A	A	A	A	H	A	A	A	A	A	A	A	A	A	A	A	A	A	A	A	A	H	A	A	A	A	A	A	A	A	A	A	A	A	A
chr10_4240292_G_T	10	4240292	+	A/C	H	A	A	A	A	A	A	A	A	A	A	A	H	A	A	A	A	A	A	A	A	A	A	A	A	A	A	A	H	A	A	A	A	A	A	A	A	A	A	A	A	A	A	H	A
chr10_424856_C_T	10	424856	-	T/C	B	B	B	B	B	B	B	B	B	B	B	B	H	B	B	B	B	H	B	B	B	B	B	H	B	B	B	B	B	B	B	B	B	B	B	B	B	B	B	B	B	B	B	B	B
chr10_426579_A_G	10	426579	+	A/G	A	A	A	A	A	A	A	A	A	A	A	A	H	A	A	A	A	A	A	A	A	A	A	H	A	A	A	A	A	A	A	A	A	A	A	A	A	A	A	A	A	A	A	A	A
chr10_4480348_C_T	10	4480348	+	A/G	A	H	H	A	A	U	H	H	A	H	A	A	A	A	B	B	A	A	A	A	A	H	A	H	A	H	B	H	A	H	A	H	A	A	A	B	H	A	H	H	H	A	A	A	A
chr10_4494943_C_T	10	4494943	-	T/C	A	A	H	A	A	U	H	H	A	A	A	A	H	A	B	A	A	A	A	A	A	A	A	A	A	A	A	A	A	A	A	H	A	A	A	A	H	A	A	A	A	A	A	A	A
chr10_4496668_C_T	10	4496668	+	A/G	A	A	H	A	A	U	H	H	A	A	A	A	H	A	B	A	A	A	A	A	A	A	A	A	A	A	A	A	A	A	A	H	A	A	A	A	H	A	H	A	A	A	A	A	A
chr10_4528943_C_T	10	4528943	+	A/G	A	A	H	A	A	U	H	H	A	A	A	A	H	A	H	A	A	A	A	A	A	A	A	A	A	A	A	A	A	A	A	H	A	A	A	A	H	A	A	A	A	A	A	A	A
chr10_4529333_A_G	10	4529333	-	T/C	B	B	H	B	B	U	H	A	B	B	B	B	A	B	A	B	B	B	B	B	B	B	B	B	B	B	B	B	B	B	B	H	B	B	B	B	B	B	B	B	B	B	B	B	B
chr10_4554068_A_G	10	4554068	+	A/G	H	B	B	B	B	B	B	B	B	B	B	B	B	B	H	B	B	B	B	B	B	B	B	B	B	B	B	B	H	B	B	H	B	B	B	B	B	B	H	B	B	B	B	H	B
chr10_4578499_G_T	10	4578499	+	A/C	B	B	H	B	B	B	H	H	B	B	B	B	H	B	H	B	B	B	B	B	B	B	B	B	B	B	B	B	B	B	B	H	B	B	B	B	H	B	B	B	B	B	B	B	B
chr10_4609600_A_G	10	4609600	+	A/G	B	B	B	B	B	B	B	B	B	B	B	B	H	B	B	B	B	B	B	B	B	B	B	B	B	B	B	B	B	B	B	B	B	B	B	B	B	B	B	B	B	B	B	B	B
chr10_4618778_A_G	10	4618778	-	T/C	B	B	B	B	B	B	B	B	U	B	U	B	H	B	B	B	B	B	U	B	U	B	B	B	B	B	B	B	B	B	B	B	B	B	B	B	B	B	B	B	B	B	B	B	B
chr10_462198_A_C	10	462198	-	T/G	H	A	B	A	A	A	A	A	A	U	A	A	H	A	H	A	A	A	A	A	A	A	A	H	A	A	A	A	H	A	A	H	A	A	A	A	A	A	H	A	A	A	A	H	A
chr10_4646126_A_C	10	4646126	+	A/C	H	B	B	B	H	U	H	B	U	B	B	H	B	H	B	B	H	B	H	H	B	B	H	B	A	B	B	H	H	B	B	H	B	H	A	B	H	B	B	B	B	B	B	H	B
chr10_4676045_C_T	10	4676045	-	T/C	A	A	H	A	A	A	A	H	A	A	A	A	A	A	H	A	A	A	A	A	A	A	A	A	A	A	A	A	A	A	A	H	A	A	A	A	A	A	H	A	A	A	A	A	A
chr10_4682746_C_T	10	4682746	-	T/C	A	A	H	A	A	A	A	H	A	A	A	A	A	A	H	A	A	A	A	A	A	A	A	A	A	A	A	A	A	A	A	H	A	A	A	A	A	A	H	A	A	A	A	A	A
chr10_4716067_C_T	10	4716067	-	T/C	B	B	A	B	B	U	H	H	B	B	B	B	H	B	A	B	B	B	B	B	B	B	B	B	B	B	B	B	B	B	B	H	B	B	B	B	B	H	H	B	B	B	B	B	B
chr10_4743330_C_T	10	4743330	-	T/C	A	A	A	A	A	A	A	A	A	A	A	A	A	A	A	A	A	A	A	A	A	A	A	A	A	A	A	A	A	A	A	H	A	A	A	A	H	A	A	A	A	A	A	A	A
chr10_4749055_A_G	10	4749055	+	A/G	A	A	A	A	A	A	A	A	A	A	A	A	A	A	A	A	A	A	A	A	A	A	A	A	A	A	U	A	A	A	A	H	A	A	A	U	H	A	A	A	A	A	A	A	A
chr10_4778848_C_T	10	4778848	+	A/G	H	B	B	B	B	B	B	B	B	B	B	B	H	B	B	B	B	B	B	B	B	B	B	B	B	B	B	B	H	B	B	B	B	B	B	B	B	B	B	B	B	H	B	H	B
chr10_4780849_A_G	10	4780849	-	T/C	H	B	B	B	B	B	B	B	B	B	B	B	B	B	B	B	B	B	B	B	B	B	B	B	B	B	B	B	H	B	B	B	B	B	B	B	B	B	B	B	B	B	B	H	B
chr10_4832746_G_T	10	4832746	-	T/G	B	B	H	B	B	B	B	H	B	B	B	B	H	B	H	B	B	B	B	B	B	B	B	B	B	B	B	B	B	B	B	H	B	B	B	B	B	B	B	B	B	B	B	B	B
chr10_4844940_A_G	10	4844940	+	A/G	B	B	H	B	B	B	B	H	B	B	B	B	H	B	H	B	B	B	B	B	B	B	B	B	B	B	B	B	B	B	B	H	B	B	B	B	B	B	B	B	B	B	B	B	B
chr10_4876135_C_T	10	4876135	-	T/C	B	B	H	B	B	B	B	H	B	B	B	B	B	B	H	B	B	B	B	B	B	B	B	B	B	B	B	B	B	B	B	H	B	B	B	B	B	B	B	B	B	B	B	B	B
chr10_489975_A_G	10	489975	-	T/C	B	B	B	B	B	B	B	B	B	B	B	B	B	B	B	B	B	B	B	B	B	B	B	B	B	B	B	B	B	B	B	B	B	B	B	B	B	B	B	H	B	B	B	B	B
chr10_4910704_A_G	10	4910704	+	A/G	B	B	H	B	B	B	B	H	B	B	B	B	B	B	H	B	B	B	B	B	B	B	B	B	B	B	B	B	B	B	B	H	B	B	B	B	H	B	B	B	B	B	B	B	B
chr10_495152_A_G	10	495152	+	A/G	A	A	A	A	A	A	H	A	A	A	A	A	A	A	A	A	A	A	A	A	A	A	A	H	A	A	A	A	A	A	A	A	A	A	A	A	H	A	A	A	A	A	A	A	A
chr10_4970395_C_T	10	4970395	-	T/C	B	B	H	B	B	B	B	H	B	B	B	H	B	B	A	B	B	B	B	B	B	B	B	B	B	B	B	B	B	B	B	H	B	B	B	B	H	B	H	B	B	H	B	B	B
chr10_5001002_A_G	10	5001002	-	T/C	A	A	A	A	A	A	H	A	A	A	A	A	H	A	A	A	A	A	A	A	A	A	A	A	A	A	A	A	A	A	A	H	A	A	A	A	A	A	B	A	A	A	A	A	A
chr10_5033489_A_G	10	5033489	+	A/G	H	B	B	B	B	U	H	B	B	B	B	B	B	B	B	B	B	B	B	B	B	B	B	B	B	B	B	B	H	B	B	B	B	B	B	B	B	B	B	B	B	B	B	H	B
chr10_5060619_C_T	10	5060619	-	T/C	A	H	H	H	A	U	H	H	A	H	A	A	H	A	H	B	A	H	A	A	A	H	A	U	A	H	H	H	H	H	A	A	H	A	A	H	A	H	B	H	H	H	A	H	A
chr10_5070085_A_C	10	5070085	-	T/G	A	H	A	A	A	A	A	A	A	H	A	A	A	A	U	H	A	A	A	A	A	A	A	A	A	H	A	A	A	A	A	A	A	A	A	A	A	A	A	A	H	A	A	H	A
chr10_5097896_C_T	10	5097896	+	A/G	A	A	H	A	A	U	A	H	A	A	A	A	A	A	H	A	A	A	A	A	A	A	A	A	A	A	B	A	A	A	A	H	A	A	A	B	U	A	B	B	A	A	A	A	A
chr10_5115392_C_T	10	5115392	+	A/G	B	B	B	H	B	U	B	B	B	B	B	B	H	B	B	H	B	B	B	U	B	H	U	H	B	B	A	H	B	H	B	B	B	B	B	A	B	B	H	A	B	B	B	B	B
chr10_5115610_A_G	10	5115610	+	A/G	B	B	B	B	B	B	B	B	B	B	B	B	B	B	B	B	B	B	B	B	B	B	B	B	B	B	B	B	B	B	B	B	B	B	B	B	B	B	H	B	B	B	B	B	B
chr10_5199136_G_T	10	5199136	-	T/G	H	A	A	A	A	A	H	A	A	A	A	A	H	A	A	A	A	A	A	A	A	A	A	A	A	A	A	A	H	A	U	A	A	A	A	A	A	A	A	A	A	A	A	H	A
chr10_5225229_A_G	10	5225229	+	A/G	H	H	H	H	A	B	H	H	A	H	A	A	H	H	H	B	H	B	A	A	A	H	A	H	A	H	B	H	B	H	A	H	H	A	H	B	B	A	B	B	H	B	A	B	A
[truncated: 12,182 more rows]
[truncated: 21 more columns]
